# Supplementary material
Source: ML conference proceedings conference paper supplement (https://openreview.net/forum?id=C5Ihi4bVQt)
Supplement: supplementary_material [file 有触发词数据集.xlsx]

## Sheet: 有触发词数据集
ID	是否提交审判委员会讨论(Judicial_committee)	审判程序(Trial_procedure)	是否存在上诉(Appeal)	是否存在抗诉(Procuratorate_appeal)	是否自诉案件(Private_prosecution)	案号(Case_number)	被告人数量(Defendant_number)	被告人1.姓名(Defendant_name)	被告人1.出生年月日(Defendant_birth)	被告人1.刑事责任能力(Responsibility_capacity)	被告人1.性别(Defendant_gender)	被告人1.年龄(Defendant_age)	被告人1.是否累犯(Recidivist)	被告人1.被告人是否有前科(Criminal_record)	被告人1.民族(Defendant_ethnicity)	被告人1.被告人是否年满75周岁(Defendant_75)	被告人1.是否特别累犯(Special_recidivist)	被告人1.职业（粗）(Defendant_occupation)	被告人1.被告人是否不满18岁(Defendant_under_18)	被告人1.职业（细）(Detailed_defendant_occupation)	被告人1.户籍地(Defendant_household_registration)	被告人1.出生地(Defendant_birthplace)	被告人1.住所地(Defendant_domicile)	被告人1.国籍(Defendant_nationality)	被告人1.教育水平(Defendant_education)	被告人1.逮捕时间(Arrest_date)	被告人1.起诉时间(Prosecution_date)	被告人1.适用刑事强制措施(Compulsory_measure)	被告人1.矛盾类型(Dispute_type)	被告人1.是否申请回避(Recusal_request)	被告人1.是否决定回避(Recusal_decision)	被告人1.是否申请非法证据排除(Excluding_evidence_request)	被告人1.是否存在排除非法证据的情形(Excluding_evidence_decision)	被告人1.是否存在庭前会议(Pretrial_conference)	被告人1.辩护人1姓名(Defender_name1)	被告人1.辩护人2姓名(Defender_name2)	被告人1.辩护人1是否法援(Legal_aid1)	被告人1.辩护人2是否法援(Legal_aid2)	被告人1.辩护人1所在机构(Defender_agency1)	被告人1.辩护人2所在机构(Defender_agency2)	被告人1.是否留置(Custody)	被告人1.是否反诉(Counterclaim)	被告人1.是否附带民事诉讼(Civil_action)	被告人1.是否发回重审(Remand_for_retrial)	被告人1.是否改判(Judgement_modified)	被告人1.是否维持原判(Judgement_upheld)	被告人1.是否认罪(Plead_guilty)	被告人1.是否悔罪(Repentance)	被告人1.是否认罚(Punishment_acceptance)
00001_徐进存寻衅滋事一审刑事判决书	1				0	（2018）冀1125刑初380号	1	徐进存	1965-11-15	完全刑事责任能力	1	54	0	0	汉族		0	其他		其他	安平县	河北省安平县	安平县	中国	初中	2018-05-25	2018-11-27	拘留 逮捕	其他存在明确被害人的纠纷	0					孙莉	董凯			河北俱时律师事务所律师。	河北俱时律师事务所律师。	0	0	0
00003_解梦祥、葛文斌交通肇事、窝藏、包庇一审刑事判决书					0	（2018）冀0635刑初182号	3	解梦祥	1992-09-27	完全刑事责任能力	1	26			汉族			务农		务农	河北省高阳县		高阳县	中国	初中	2018-07-25	2018-11-05	取保候审 拘留 逮捕	其他存在明确被害人的纠纷						李雪				河北旭天律师事务所		0	0	0					1
00004_陈×诈骗罪一审刑事判决书		简易			0	（2014）朝刑初字第2448号	1	陈X	1980-03-08	完全刑事责任能力	0	34	0	0												2014-06-13	2014-08-12	逮捕 拘留	其他存在明确被害人的纠纷						李晓辉				内蒙古义源律师事务所		0	0	0
00005_胡朝阳开设赌场一审刑事判决书		简易			0	（2018）粤0507刑初456号	1	胡朝阳	1989-07-25	完全刑事责任能力	1	29	0	0	汉族		0	无业		无业	湖南省衡南县		湖南省衡南县	中国	初中	2018-02-10	2018-08-01	逮捕 拘留	不存在明确被害人的纠纷						宋伟国	许春雨			广东潮之荣律师事务所	广东潮之荣律师事务所	0	0	0
00006_王连生、李云德票据诈骗、合同诈骗一审刑事判决书			1		0	（2017）津0117刑初112号	3	王连生	1966-01-17	完全刑事责任能力	1	51			汉族			无业		无业			天津市红桥区		初中	2015-11-03	2016-04-08	逮捕 拘留	其他存在明确被害人的纠纷						赵建华	许媛媛			天津金宜舰律师事务所	天津金宜舰律师事务所	0	0	0	1
00007_李某甲盗窃罪一审刑事判决书					0	（2014）娄星刑初字第254号	1	李某甲		完全刑事责任能力						0			1							2014-03-16	2014-05-30	逮捕 拘留 取保候审	不存在明确被害人的纠纷												0	0	0
00008_张磊走私、贩卖、运输、制造毒品罪一审刑事判决书		简易			0	（2018）辽0102刑初803号	1	张磊	1985-10-29	完全刑事责任能力	1	33	1	1	汉族		0	无业		无业	辽宁省沈阳市	辽宁省沈阳市		中国	初中	2018-06-20	2018-09-05	逮捕 拘留	不存在明确被害人的纠纷												0	0	0
00010_丁某、张某等犯盗窃罪肖某犯掩饰、隐瞒犯罪所得罪一审刑事判决书					0	（2016）苏0982刑初163号	4	丁某					0	0												2016-02-04	2016-04-29	逮捕 拘留	其他存在明确被害人的纠纷			1	0								0	0	0				1
00011_吕鑫盗窃一审刑事判决书			1		0	（2019）川1304刑初147号	1	吕鑫	1989-12-22	完全刑事责任能力	1	30	1	1	汉族						四川省苍溪县	四川省广元市苍溪县		中国	初中	2018-12-13	2019-03-11	拘留 逮捕	其他存在明确被害人的纠纷						赵勇				四川鑫中云律师事务所		0	0	0	1
00012_韩飞、张军4ren侵犯公民个人信息一审刑事判决书		普通			0	（2017）皖0321刑初80号	4	韩飞	1985-10-11	完全刑事责任能力	1	32			汉族			务工		务工		河南省商丘市永城市	河南省商丘市永城市		高等专科学校	2016-09-19	2017-02-06	拘留 逮捕	其他存在明确被害人的纠纷						左增连				安徽皖成律师事务所		0	0	0
00013_杨蕾诈骗一审刑事判决书					0	（2017）沪02刑初6号	1	杨蕾	1972-03-28	完全刑事责任能力	0	45			汉族			其他		其他	上海市	上海市杨浦区	上海市浦东新区	中国	高等专科学校				其他存在明确被害人的纠纷						章进				上海盈科律师事务所		0	0	0
00015_尹某强奸罪一审刑事判决书		普通			0	（2018）内0526刑初426号	1	尹某	1980-03-14	完全刑事责任能力	1	38			汉族	0		无业	0	无业		吉林省四平市			初中	2018-02-27	2018-09-20	逮捕	其他存在明确被害人的纠纷						宫品晶		0		内蒙古匡维律师事务所		0	0	0
00016_董志刚职务侵占、挪用资金一审刑事判决书					0	（2017）浙0212刑初380号	1	董志刚	1972-07-11	完全刑事责任能力	1	45			汉族			其他		其他		浙江省象山县	宁波市鄞州区		大学本科	2017-05-22	2017-04-11	取保候审 拘留	其他存在明确被害人的纠纷						邓旭东	陆琳			浙江合创律师事务所	浙江合创律师事务所	0	0	0
00017_向某某走私、贩卖、运输、制造毒品一审刑事判决书					0	（2018）沪0114刑初1796号	1	向某某	1988-02-08	完全刑事责任能力	0	30			汉族								上海市杨浦区	中国			2018-11-09		不存在明确被害人的纠纷						王通宾				上海市大众律师事务所		0	0	0						1
00018_张志朋、李勇盗窃罪一审刑事判决书					0	（2016）晋0423刑初102号	2	张志朋	1989-10-07	完全刑事责任能力	1	28			汉族			无业		无业			山西省襄垣县		小学	2016-01-13	2016-08-03	拘留 逮捕	不存在明确被害人的纠纷						马鹏荣				山西理冠律师事务所		0	0	0
00019_刘素霞故意伤害一审刑事判决书	1	普通			0	（2018）豫1623刑初408号	1	刘素霞	1973-03-08	完全刑事责任能力	0	45		0	汉族			其他		其他	河南省商水县		河南省商水县	中国	初中	2018-05-08	2018-07-04	逮捕	邻里矛盾						赴建				河南豫龙律师事务所		0	0	1
00020_岩书腊走私、贩卖、运输、制造毒品一审刑事判决书					0	（2016）云28刑初137号	1	岩书腊	1985-07-08	完全刑事责任能力	1	31	0	0	布朗族			务农		务农	云南省勐海县		云南省勐海县	中国	小学	2015-10-13	2016-04-08	逮捕 拘留	不存在明确被害人的纠纷						崔庆礼				云南法泽律师事务所		0	0	0				1
00021_5ren （2018）陕0924刑初65号被告人钟某成、刘某刚、卢某发犯盗窃罪、被告人费某军、张某爱犯掩饰、隐瞒犯罪所得罪一案刑事判决书					0	（2018）陕0924刑初65号	5	钟某某	1985-06-08	完全刑事责任能力	1	33	0	0	汉族			务农		务农			陕西省安康市紫阳县			2018-07-10	2018-11-16	拘留 逮捕	其他存在明确被害人的纠纷						戴某某				陕西某律师事务所		0	0	0				1	1
00022_钱洋抢劫罪一审刑事判决书					0	（2018）甘0902刑初272号	1	钱洋			1															2018-03-20	2018-05-21	逮捕 拘留	其他存在明确被害人的纠纷						吴佛寿				酒泉阳关律师事务所		0	0	0				1
00023_陈巍晶犯制作、复制、出版、贩卖淫秽物品牟利罪、侵犯著作权罪一审刑事判决书		简易			0	（2015）新刑初字第0320号	1	陈巍晶					0	1				其他		其他						2015-06-19	2015-08-27	逮捕 拘留	不存在明确被害人的纠纷						周鹰				江苏三诚律师事务所		0	0	0				1
00025_被告人刘某某贩卖毒品一案刑事判决书		简易			0	刑事判决书 （2016）湘0181刑初1001号	1	刘某佳	1983-10-12	完全刑事责任能力	1	33										湖南省浏阳市				2016-08-17	2016-11-01	逮捕 拘留	不存在明确被害人的纠纷												0	0	0
00027_王钢、张咏盗窃一审刑事判决书					0	（2014）石大刑初字第49号	2	王钢	1970-01-04	完全刑事责任能力	1	44	1	1	汉族			其他		其他		宁夏回族自治区平罗县	宁夏回族自治区平罗县		普通高级中学	2013-08-30	2014-02-10	拘留 逮捕	其他存在明确被害人的纠纷												0	0	0
00028_卢文杨盗窃罪刑事判决书			1		0	（2009）南刑少终字第3号	1	卢文杨（张宝）	1977-06-25	完全刑事责任能力	1	32	0	0												2008-09-11		逮捕 拘留 取保候审	不存在明确被害人的纠纷						黄建				河南梅溪律师事务所		0	0	0		1
00030_熊某、马某某、夏某、王某4ren寻衅滋事一审刑事判决书		简易			0	（2017）湘0302刑初31号	4	熊某	1984-02-23	完全刑事责任能力	1	33			汉族			其他		其他	湖南省湘潭市雨湖区			中国	大学本科	2016-11-07	2017-02-20	拘留 逮捕	其他存在明确被害人的纠纷												0	0	0
00031_李志芹诈骗罪二审刑事判决书			1		0	（2013）东中法刑二终字第227号	1	李志芹			1															2012-11-01		拘留 逮捕	其他存在明确被害人的纠纷						陈敬汉				广东科德（东莞）律师事务所		0	0	0		1	1
00032_祁向明虚假出资、抽逃出资罪，祁向明虚开增值税专用发票、用于骗取出口退税、抵扣税款发票罪一审刑事判决书					0	（2012）杭萧刑初字第1340号	1	祁向明					1	1												2011-05-25	2012-07-06	拘留 逮捕							朱国发				浙江钱江潮律师事务所		0	0	0
00034_江西省现代路桥工程总公司、刘某甲单位受贿、对单位行贿、受贿二审刑事判决书			1	1	0	（2015）饶中刑二终字第18号	2	刘某甲										其他		其他						2014-01-29		监视居住 逮捕 取保候审							余晓春	曾毅			江西瀚中春律师事务所	江西瀚中春律师事务所	0	0	0		1
00035_高某甲、王某甲等3ren盗窃罪一审刑事判决书					0	（2014）临刑初字第106号	3	高某甲																		2013-11-20	2014-02-25	拘留 逮捕	其他存在明确被害人的纠纷												0	0	0				1
00036_李剑盗窃罪一审刑事判决书					0	（2019）桂0103刑初293号	1	李剑	1991-06-26	完全刑事责任能力	1	29	1	1	壮族		0	无业		无业	广西壮族自治区河池市南丹县			中国	高等专科学校	2019-01-08	2019-04-26	逮捕 取保候审 拘留	其他存在明确被害人的纠纷												0	0	0				1
00038_李志昇开设赌场一审刑事判决书					0	刑事判决书 （2016）赣0502刑初461号	1	李志昇	1989-04-17	完全刑事责任能力	1	28	0	0	汉族			无业		无业		湖南省溆浦县	湖北省武汉市硚口区	中国	普通高级中学	2016-04-29	2016-12-20	逮捕 拘留	不存在明确被害人的纠纷						陈禾平				江西三江合律师事务所		0	0	0
00040_被告人纪振华故意伤害一案一审刑事判决书					0	（2015）耀刑初字第00039号	1	纪某某		完全刑事责任能力	1				汉族										初中	2015-03-24	2015-06-24	逮捕 拘留	其他存在明确被害人的纠纷												0	0	0				0	0
00041_赵某乙、赵某甲等盗窃罪，王某乙、张某丙掩饰、隐瞒犯罪所得、犯罪所得收益罪二审刑事判决书			1		0	（2013）唐刑终字第169号	1	赵某甲	1991-11-03	完全刑事责任能力	1	22			汉族			务农		务农						2012-04-27		拘留 逮捕							曹凤鸣				河北万春律师事务所		0	0	0		1
00042_李旭一审刑事判决书					0	（2017）云71刑初192号	1	李旭	1995-04-05	完全刑事责任能力	1	22	1	1	汉族			无业		无业		贵州省遵义市仁怀市			小学	2017-08-25	2017-11-30	逮捕 拘留	不存在明确被害人的纠纷						孔睿		1		云南兴津律师事务所		0	0	0
00043_冯某某、董某某盗窃、掩饰、隐瞒犯罪所得、犯罪所得收益一审刑事判决书					0	（2018）粤1226刑初1号	2	冯某某	1986-05-13	完全刑事责任能力	1	32	1	1	汉族						广东省德庆县			中国		2017-11-21		拘留 逮捕	其他存在明确被害人的纠纷						林锦永		1		广东创致律师事务所		0	0	0
00044_汤某某非法吸收公众存款一审刑事判决书					0	（2017）鄂0112刑初530号	1	汤某某		完全刑事责任能力																2017-07-28	2017-09-21	取保候审 拘留 逮捕	不存在明确被害人的纠纷						余传泉				湖北东吴弘泰律师事务所		0	0	0
00045_孙朝阳走私、贩卖、运输、制造毒品一审刑事判决书		简易			0	（2017）津0116刑初20037号	1	孙朝阳（大狼）	1980-09-19	完全刑事责任能力	1	37	1	1												2016-07-08	2016-12-24	逮捕 拘留	不存在明确被害人的纠纷												0	0	0
00046_朱标栋犯非法经营罪一审刑事判决书					0	（2017）琼02刑初4号	1	朱标栋	1997-05-20	完全刑事责任能力	1	20	0	0	汉族			其他		其他					普通高级中学	2016-08-19	2017-01-20	拘留 逮捕	不存在明确被害人的纠纷						陈正伟				海南唐海律师事务所		0	0	0				1	1
00047_刘有保犯故意伤害罪刑事判决书					0	（2015）临刑初字第69号	1	刘某某					0	0												2015-07-31	2015-03-15	逮捕 取保候审	其他存在明确被害人的纠纷						张帆				山西临水律师事务所		0	0	1
00048_李某2猥亵儿童一审刑事判决书		简易			0	（2019）沪0115刑初1164号	1	李某2	1945-05-26	完全刑事责任能力	1	74			汉族						安徽省			中国			2019-03-15		其他存在明确被害人的纠纷						瞿孝荣		1		上海国年律师事务所		0	0	0
00050_俞天信、王清新3人盗窃一审刑事判决书		简易			0	（2017）皖1102刑初47号	3	俞天信	1966-03-05	完全刑事责任能力	1	51			汉族			务农		务农	安徽省芜湖市南陵县	安徽省芜湖市南陵县	安徽省滁州市定远县	中国	小学	2016-10-12	2017-03-13	拘留 逮捕							王飞				安徽奇胜律师事务所		0	0	0
00051_被告人刘忠合同诈骗罪一审刑事判决书			1		0	（2015）翠屏刑初字第600号	1	刘忠	1963-05-25	完全刑事责任能力	1	53											四川省成都市青羊区			2013-08-10	2014-04-21	拘留 逮捕	其他存在明确被害人的纠纷												0	0	0	1
00052_黄廷刚、曾凡银5人重大劳动安全事故一审刑事判决书					0	（2018）鄂0525刑初67号	5	黄廷刚	1969-12-30	完全刑事责任能力	1	49			汉族			其他		其他	重庆市万州区		湖北省宜昌市远安县	中国	初中	2017-11-22	2018-07-30	拘留 逮捕	其他存在明确被害人的纠纷						冯愿妮	杨先波			湖北三峡律师事务所	湖北沮城律师事务所	0	0	0				1
00053_被告人韩东贪污罪一审刑事判决书	1	普通			0	（2016）鲁1722刑初290号	1	韩东	1966-11-20	完全刑事责任能力	1	51	0	1	汉族							山东省德州市乐陵市	山东省济南市		硕士研究生	2015-10-15	2016-09-12	拘留 逮捕	不存在明确被害人的纠纷						苑强	石兴跃			山东京鲁律师事务所	山东君诚仁和律师事务所	0	0	0
00055_吴海龙、王朱明2人保险诈骗罪一审刑事判决书					0	（2015）堆刑初字第37号	2	吴海龙	1977-09-15	完全刑事责任能力	1	38	0	0	汉族			务工		务工		四川省遂宁市	西藏自治区拉萨市城关区		小学	2015-07-20	2015-10-15	拘留 逮捕													0	0	0					1
00056_罗青危险驾驶罪一审刑事判决书		简易			0	（2019）陕0328刑初4号	1	罗青	1992-03-02	完全刑事责任能力	1	26	1	1	汉族	0		务农	0	务农		陕西省陇县	陇县		初中	2017-02-15	2019-01-28	拘留 取保候审 取保候审	其他存在明确被害人的纠纷												0	0	0
00057_李某某危险驾驶一审刑事判决书		速裁			0	（2018）豫0105刑初168号	1	李某某	1990-02-16	完全刑事责任能力	1	28			汉族			无业		无业		河南省睢县	河南省睢县		初中	2018-01-25	2018-01-23	拘留 取保候审 逮捕	其他存在明确被害人的纠纷						李新凯				河南路德律师事务所		0	0	0
00058_栗某某盗窃案一审刑事判决书					0	（2013）安少刑初字第00099号	1	栗某某	1990-03-01	完全刑事责任能力	1	23			汉族	0			1			河南省安阳县					2013-05-23		其他存在明确被害人的纠纷												0	0	0
00059_卢某犯容留他人吸毒罪一审刑事判决书		简易			0	（2016）湘0111刑初794号	1	卢某										无业		无业			河南省济源市			2016-06-30	2016-11-09	拘留 逮捕	不存在明确被害人的纠纷												0	0	0
00060_谭晋彪受贿罪一审刑事判决书					0	（2017）琼9701刑初108号	1	谭晋彪	1983-12-10	完全刑事责任能力	1	34			汉族			其他		其他	海南省			中国	中专（包括职业高中，中等专业学校，技工学校）	2017-08-25	2017-11-24	拘留 逮捕	不存在明确被害人的纠纷						符定福				海南为先律师事务所		0	0	0
00061_高翠玲、陈某故意伤害罪二审刑事判决书			1		0	（2018）川08刑终145号	1	高翠玲	1969-12-08	完全刑事责任能力	0	50			汉族			务农		务农		四川省广元市青川县	四川省广元市青川县		小学	2012-12-06		拘留 逮捕	其他存在明确被害人的纠纷						何恩乾				四川天使明月律师事务所		0	0	1		1	1
00062_张文斌故意杀人、故意伤害二审刑事判决书			1		0	（2016）赣刑终76号	1	张文斌	1989-07-05	完全刑事责任能力	1	27			汉族			务工		务工	江西省萍乡市	江西省	江西省萍乡市	中国	中专（包括职业高中，中等专业学校，技工学校）	2014-06-23		拘留 逮捕	其他存在明确被害人的纠纷						冯树敏		1		江西朗秋律师事务所		0	0	0		1	1	1
00063_夏某某寻衅滋事一审刑事判决书		简易			0	（2015）松刑初字第601号	1	夏某某																			2015-04-23		其他存在明确被害人的纠纷						颜美星				上海闰德律师事务所		0	0	0				1
00064_李某、宋某盗窃罪，武某掩饰、隐瞒犯罪所得、犯罪所得收益罪4ren一审刑事判决书					0	（2012）馆刑初字第69号	4	李某					0	1				务农		务农						2012-07-10		拘留 逮捕													0	0	0				1
00065_余洪如盗窃一审刑事判决书					0	（2018）沪0151刑初261号	1	余洪如	1976-03-18	完全刑事责任能力	1	42	0	0	汉族						安徽省阜阳市		浙江省金华市义乌市	中国			2018-10-17								孙琦				上海市尚未律师事务所		0	0	0
00066_邓忠秀非法行医一审刑事判决书		简易			0	（2016）粤2072刑初2134号	1	邓忠秀	1973-09-10	完全刑事责任能力	0	43	0	0	汉族			务农		务农	中山市	云南省腾冲市		中国	高等专科学校	2016-08-06	2016-11-08	拘留 逮捕	不存在明确被害人的纠纷						李伟光	肖铭			广东南鹏展法律师事务所	广东南鹏展法律师事务所	0	0	0					1
00067_张志刚、孙伟寻衅滋事一审刑事判决书					0	（2016）豫0108刑初261号	2	张志刚	1992-07-08	完全刑事责任能力	1	25			汉族			无业		无业		河南省驻马店市西平县	河南省驻马店市西平县		初中	2016-09-01	2016-12-12	拘留 逮捕	其他存在明确被害人的纠纷						杨广甫	王玉			河南绿城律师事务所	河南绿城律师事务所	0	0	0
00068_陈某甲、陈某乙等盗窃罪，李某掩饰、隐瞒犯罪所得、犯罪所得收益罪一审刑事判决书					0	（2015）泗刑初字第9号	3	陈某甲		完全刑事责任能力			0	0				务农		务农						2014-06-21	2015-01-07	逮捕 拘留							马新华		1		泗水县法律援助中心		0	0	0				1
00069_陈某甲虚开增值税专用发票罪一审刑事判决书					0	（2015）繁刑初字第00314号	1	陈某甲			1				汉族								芜湖市三山区		中专（包括职业高中，中等专业学校，技工学校）	2015-08-20	2015-12-23	监视居住													0	0	0				1	1
00070_于某甲等4人盗窃、掩饰、隐瞒犯罪所得罪一审刑事判决书			1		0	（2015）海刑重初字第1号	4	于某甲																		2012-12-27	2013-09-26	拘留 逮捕	其他存在明确被害人的纠纷												0	0	0	1
00071_00149杜某某强奸案一审刑事判决书					0	（2015）灞刑初字第00149号	1	杜某某			1																2015-06-12		其他存在明确被害人的纠纷						郭晓颖		1		郭晓颖		0	0	0
00072_何志华、易建强、汤西安犯诈骗罪一审刑事判决书		普通			0	（2013）鄂江汉刑初字第00675号	3	何志华		完全刑事责任能力	1		1	1			0										2013-09-04	取保候审 逮捕	其他存在明确被害人的纠纷												0	0	0
00073_黄某甲等盗窃罪一审刑事判决书		普通			0	（2015）济阳刑初字第97号	4	黄某甲	1975-01-14	完全刑事责任能力	1	40	0	1	汉族		0					山东省济阳县	济阳县		初中		2015-05-08	拘留 逮捕	其他存在明确被害人的纠纷												0	0	0
00074_李某甲犯寻衅滋事罪、开设赌场罪一审刑事判决书					0	（2015）台椒刑初字第763号	1	李某甲										务农		农民								拘留	其他存在明确被害人的纠纷 不存在明确被害人的纠纷						陈徐红				浙江星海律师事务所		0	0	0
00075_王振亮、王其东、王怀金、谢路奇盗窃、掩饰隐瞒犯罪所得罪一审刑事判决书					0	（2017）鲁1482刑初93号	4	王振亮			1				汉族						山东省齐河县	山东省齐河县	山东省齐河县	中国		2017-05-19	2017-10-31	拘留 逮捕	其他存在明确被害人的纠纷						潘长城				山东君城律师事务所		0	0	0
00076_杨萌、吕永帅非法经营一审刑事判决书					0	（2017）豫1303刑初717号	5	杨萌	1978-02-02	完全刑事责任能力	1	41	0	1	汉族		0						河南省舞阳县		初中	2017-01-06	2017-08-04	拘留 逮捕	不存在明确被害人的纠纷						李杏杰	闫振伟			河南大法律师事务所	河南船旗律师事务所	0	0	0
00077_王英平强奸罪一审刑事判决书		简易转普通			0	2018）浙0783刑初1018号	1	王英平	1996-09-14	2	1	24			汉族			务农		农民		黔西县	黔西县		小学	2018-08-08	2018-09-13	拘留 逮捕	其他存在明确被害人的纠纷						蒋瑶		1		浙江无双律师事务所		0	0	0
00078_吴根雄重婚、诈骗一审刑事判决书					0	（2015）肇端法刑初字第103号	1	吴根雄			1		0	1	汉族		0				广东省封开县			中国	初中	2014-07-17	2015-01-19	拘留 逮捕	其他存在明确被害人的纠纷						戴伟瑜				广东继海律师事务所		0	0	0
00080_欧阳某章盗窃罪刑事判决书					0	（2016）湘0381刑初235号	1	欧阳某某	1971-10-05	完全刑事责任能力	1	45			汉族			务农		农民	湖南省安化县			中国	小学	2016-09-05	2016-11-11	拘留 逮捕	其他存在明确被害人的纠纷												0	0	0
00081_李静挪用资金一审刑事判决书					0	（2013）辰刑初字第0579号	1	李静																			2013-11-26		其他存在明确被害人的纠纷						吴东玲				山东中苑律师事务所		0	0	0
00082_陈志林非法制造、买卖、运输、邮寄、储存枪支、弹药、爆炸物一审刑事判决书					0	（2017）皖0825刑初186号	1	陈志林	1988-05-15	完全刑事责任能力	1	29	0	0	汉族		0	务工		服装加工	安徽省太湖县		安徽省太湖县	中国	普通高级中学		2017-09-01	取保候审	不存在明确被害人的纠纷						徐群星				安徽唐功彬律师事务所		0	0	0
00083_闫海亮、ＸＸＸ等诈骗罪一审刑事判决书					0	（2017）皖0825刑初186号	3	闫海亮			1				汉族			无业		无业	辽宁省康平县			中国	高等专科学校	2017-02-22	2017-08-14	拘留 逮捕	其他存在明确被害人的纠纷												0	0	0
00084_侯增元、孙时学盗窃一审刑事判决书					0	（2017）鲁0783刑初209号	5	侯增元	1980-03-17	完全刑事责任能力	1	37	1	1	汉族		0	务农		农民		山东省潍坊市寒亭区	山东省潍坊市寒亭区		文盲	2016-12-20	2017-03-21	拘留 逮捕	其他存在明确被害人的纠纷												0	0	0
00085_赵某某盗窃、黄某掩饰、隐瞒犯罪所得一审刑事判决书					0	（2013）临罗刑二初字第12号	2	赵某某			1				汉族											2013-03-01	2013-09-16	拘留 逮捕	其他存在明确被害人的纠纷						焦炜				山东正之源律师事务所律师		0	0	0				1
00086_被告人阿旺嘎旦职务侵占一审刑事判决书					0	（2016）藏2221刑初58号	1	阿旺嘎旦	1949-05-10		1	67			藏族			其他		山南市乃东区结莎居委会主任		西藏自治区山南市乃东区	西藏自治区山南市乃东区		小学	2016-08-01	2016-08-25	拘留 逮捕 取保候审	不存在明确被害人的纠纷												0	0	0
00087_梁某某盗窃一案的一审的刑事判决书					0	（2016）皖1321刑初251号	1	梁某某	1960-05-01		1	56	0	1	汉族		0	务农		农民		安徽省宿州市萧县			小学		2016-11-07		其他存在明确被害人的纠纷						杜正立				安徽梨苑律师事务所		0	0	0
00088_梁伟忠、洪汉华非法制造、买卖、运输、邮寄、储存枪支、弹药、爆炸物、非法持有、私藏枪支、弹药、走私、贩卖、运输、制造毒品、容留他人吸毒一审刑事判决书					0	（2014）中一法刑一初字第80号	4	梁伟忠	1968-12-25	完全刑事责任能力	1	46	1	1	汉族		0	无业		无业	中山市石岐区	广东省中山市		中国	初中	2013-06-06	2013-12-24	拘留 逮捕	不存在明确被害人的纠纷												0	0	0
00089_覃伟贩卖毒品罪一审刑事判决书					0	（2017）渝0103刑初1720号	1	覃伟	1971-12-19	完全刑事责任能力	1	49	1	1	汉族		0	无业		无业	重庆市渝中区	重庆市渝中区		中国	普通高级中学	2017-11-02	2017-11-27	拘留 逮捕	不存在明确被害人的纠纷												0	0	0
00090_（2017）湘11刑终262号 被告人滕某明、唐某平、胡某荣、吴某春、张某平犯滥用职权罪、被告单位东安绿源早熟蜜梨农民专业合作社犯单位行贿罪一案二审刑事判决书			1		1	（2017）湘11刑终262号	6	滕某明	1966-09-02	完全刑事责任能力	1	51			汉族			其他		农业综合开发办公室原主任		湖南省东安县	东安县		大学本科			取保候审	不存在明确被害人的纠纷												0	0	0				1
00092_章某某走私、贩卖、运输、制造毒品一审刑事判决书		简易			0	（2018）沪0113刑初218号	1	章某某	1963-02-24	完全刑事责任能力	1	55			汉族								上海市宝山区				2018-01-29		不存在明确被害人的纠纷												0	0	0
00093_郑某、陈鹏程故意伤害罪一审刑事判决书		普通			0	（2018）闽0322刑初282号	1	陈鹏程	1984-08-10	完全刑事责任能力	1	30			汉族			务农		务农		福建省仙游县	福建省仙游县		初中	2017-07-27	2018-04-12	拘留 逮捕	其他存在明确被害人的纠纷												0	0	0				1
00094_倪秀聪强奸罪一审刑事判决书		普通			0	（2017）浙0783刑初1006号	1	倪秀聪	1987-06-14	完全刑事责任能力	1	30			汉族			务农		务农		贵州省威宁彝族回族苗族自治县	威宁彝族回族苗族自治县		文盲	2017-07-19	2017-09-24	逮捕	其他存在明确被害人的纠纷												0	0	0
00095_张均强、冯恩重窃取、收买、非法提供信用卡信息、掩饰、隐瞒犯罪所得、犯罪所得收益、伪造公司、企业、事业单位、人民团体印章一审刑事判决书					0	（2018）豫1221刑初461号	6	张均强	1971-11-03	完全刑事责任能力	1	47			汉族			务农		务农	山东省菏泽市牡丹区		山东省菏泽市牡丹区	中国	初中	2018-05-30	2018-11-14	逮捕 拘留	不存在明确被害人的纠纷												0	0	0
00096_杨X诈骗案一审刑事判决书					0	（2014）绿刑初字第43号	1	杨X	1983-07-03	完全刑事责任能力	1	31			哈尼族			务农		务农	云南省绿春县			中国	中专（包括职业高中，中等专业学校，技工学校）		2014-06-09	监视居住	不存在明确被害人的纠纷												0	0	0
00097_勾某某、时广胜犯盗窃罪一审刑事判决书					0	（2018）辽0411刑初81号	2	勾某某	1983-06-10	完全刑事责任能力	1	35	0	1	汉族		0	无业		无业			辽宁省抚顺市东洲区		初中	2017-09-08	2018-03-12	拘留 逮捕	其他存在明确被害人的纠纷												0	0	0
00098_冯康锐、冯熠等贪污罪一审刑事判决书					0	（2014）浙温刑初字第66号	5	冯康锐		完全刑事责任能力								其他		浙江中盛实业投资公司总经理、温州中瑞房地产公司总经理、温州中辰实业投资有限公司董事长						2013-05-10	2014-04-04	拘留 逮捕 监视居住	不存在明确被害人的纠纷						苏德栋	谢作坚	0	0	国浩律师（北京）事务所	浙江海昌律师事务所	0	0	0
00099_王海勇、王某甲犯盗窃罪黄某犯掩饰、隐瞒犯罪所得、犯罪所得收益罪一审刑事判决书		普通			0	（2015）东刑初字第1436号	3	王海勇					1	1			0	务农		务农						2015-05-14	2015-10-14	拘留 逮捕	不存在明确被害人的纠纷						徐航		1		浙江乌元律师事务所		0	0	0
00100_陈志焕等非法经营罪一审刑事判决书					0	（2015）鄂老河口刑初字第00155号	4	陈志焕			1		0	0			0									2015-01-05	2015-10-10		不存在明确被害人的纠纷						李国权	李国权	1	0	河南省新野县法律援助中心律师	湖北宏义律师事务所律师	0	0	0				1	1
00101_张涛侵犯公民个人信息罪一审刑事判决书					0	（2019）桂0302刑初71号	1	张涛	1989-12-13	完全刑事责任能力	1	30			汉族			其他		桂林某公司工程部项目经理	广西壮族自治区贺州市八步区	广西壮族自治区贺州市	桂林市七星区	中国	高等专科学校	2018-07-14		逮捕 逮捕	不存在明确被害人的纠纷						吴雪峰		0		广西作一律师事务所律师		0	0	0
00102_陈忠政盗窃、诈骗、陈国雄盗窃、合同诈骗、贩卖毒品、林某甲掩饰、隐瞒犯罪所得一审刑事判决书					0	（2014）仙刑初字第347号	3	陈忠政			1		1	1			0						福建省莆田市仙游县			2013-10-01	2014-05-15		其他存在明确被害人的纠纷												0	0	0				1
00103_刘淑佳、庄妙和盗窃、非法经营一审刑事判决书		简易			0	（2017）粤0491刑初120号	3	刘淑佳	1995-08-23	完全刑事责任能力	1	62			汉族						广东省汕头市潮南区			中国	初中	2017-05-26		拘留 逮捕	其他存在明确被害人的纠纷 不存在明确被害人的纠纷						杨艺		0		广东瀛凯邦律师事务所		0	0	0
00105_许虎成盗窃一审刑事判决书					0	00105_许虎成盗窃一审刑事判决书	1	许某某	1970-02-27	完全刑事责任能力	1	46			朝鲜族			无业		无业	吉林省和龙市		吉林省延吉市	中国	文盲	2016-04-29	2016-07-25	拘留 逮捕	其他存在明确被害人的纠纷												0	0	0				1
00107_刘代卫故意杀人二审刑事判决书			1		1	（2018）鄂28刑终21号	1	刘代卫	1986-12-16	完全刑事责任能力	1	32			土家族			务农		务农	恩施市	湖北省恩施土家族苗族自治州恩施市	恩施市	中国	初中	2016-12-23		拘留 逮捕	其他存在明确被害人的纠纷												0	0	0
00108_李某贪污罪再审刑事判决书			1		1	（2014）浙金刑再终字第1号	1	李某										其他		原系义乌市江东街道九联村旧村改造办公室出纳						2008-10-29			不存在明确被害人的纠纷												0	0	0		1	0
00109_焦×等侵犯著作权罪二审刑事判决书				1	0	（2014）一中刑终字第1175号	2	高×	1970-12-25	完全刑事责任能力	1	43														2012-10-26		拘留 逮捕 取保候审	其他存在明确被害人的纠纷												0	0	0				1	1
00110_钟某某、朱某某盗窃一审刑事判决书					0	（2016）鄂0116刑初224号	2	钟某某																		2015-12-09	2016-04-26	拘留 逮捕	其他存在明确被害人的纠纷												0	0	0
00111_程金栋、王建华犯盗窃罪一审刑事判决书					0	（2016）鲁1202刑初118号	2	程某某		完全刑事责任能力			1	1			0	其他		个体						2015-07-10			其他存在明确被害人的纠纷												0	0	0
00112_郭国安走私、贩卖、运输、制造毒品一审刑事判决书		43357			0	（2018）沪0106刑初989号	1	郭国安	1962-08-09	完全刑事责任能力	1	56	0	1	汉族		0				上海市宝山区		上海市宝山区	中国			2018-09-03		不存在明确被害人的纠纷												0	0	0
00113_徐某某走私、贩卖、运输、制造毒品一审刑事判决书		简易			0	（2018）沪0110刑初705号	1	徐某某					0	1			0												不存在明确被害人的纠纷												0	0	0				1		1
00114_周凡、唐明武、李东犯诈骗罪一审刑事判决书					0	（2017）川0725刑初48号	3	周凡	1984-06-07	完全刑事责任能力	1	33	1	1	汉族		0	务农		务农	湖北省仙桃市			中国	普通高级中学	2016-11-22	2017-03-29	逮捕 拘留	其他存在明确被害人的纠纷						赵兴甲	王富昌	1	1	四川经义律师事务所律师	四川经义律师事务所律师	0	0	0
00115_文某、陈某甲盗窃一审刑事判决书					0	（2015）中二法刑二初字第840号	3	文某			1				土家族			务农		务农	贵州省德江县	贵州省德江县		中国	初中	2015-07-09	2015-12-01	拘留 逮捕	其他存在明确被害人的纠纷												0	0	0
00116_阮廷山盗窃、故意毁坏财物一审刑事判决书					0	（2016）粤0783刑初412号	1	阮廷山	1974-10-16	完全刑事责任能力	1	42	1	1	壮族		0	务农		务农		广西壮族自治区田东县	广西壮族自治区田东县		初中	2016-06-29	2016-09-22		其他存在明确被害人的纠纷 其他存在明确被害人的纠纷												0	0	0
00117_许建强制猥亵强一审刑事判决书		普通			0	（2016）甘0982刑初143号	1	许建	1984-11-22	完全刑事责任能力	1	32											甘肃省酒泉市敦煌市												魏强		0		甘肃飞天律师事务所		0	0	0
00118_郭宽泽、吴永祥故意伤害罪一审刑事判决书		简易转普通			0	（2016）苏0583刑初1728号	2	郭宽泽	1969-05-04	完全刑事责任能力	1	47			汉族			其他		公司员工			河南省灵宝市		初中	2016-06-08	2016-10-13		其他存在明确被害人的纠纷						王团结		0		北京惠诚（昆山）律师事务所		0	0	0
00119_张子保、张冠军开设赌场一审刑事判决书					0	（2016）皖1602刑初247号	5	张子保	1977-10-04	完全刑事责任能力	1	39			汉族			无业		无业	亳州市谯城区	安徽省亳州市谯城区	亳州市谯城区	中国	初中		2016-03-28	取保候审	不存在明确被害人的纠纷												0	0	0
00120_王冠宇等非国家工作人员受贿罪一审刑事判决书					0	（2014）海刑初字第1635号	2	王冠宇	1977-05-08	完全刑事责任能力	1	37														2014-08-07	2014-07-11	取保候审 逮捕	不存在明确被害人的纠纷						李朝晖	陈广宇	0	0	北京德恒律师事务所	北京市君泽君律师事务所	0	0	0
00121_王子光、王桂涛盗窃一审刑事判决书					0	（2017）鲁1791刑初19号	2	王子光	1977-06-08	完全刑事责任能力	1	40	0	1	汉族		0	无业		无业		安徽省阜阳市颍州区	阜阳市颍州区		初中	2016-09-07	2017-01-13	拘留 逮捕	其他存在明确被害人的纠纷						胡文博		0		山东晟韵律师事务所		0	0	0				1
00122_唐伟军、刘华国盗窃、掩饰、隐瞒犯罪所得、犯罪所得收益一审刑事判决书		普通			0	（2017）赣0203刑初68号	3	唐伟军	1989-10-16	完全刑事责任能力	1	28	1	1	汉族		0	无业		无业	广东省连州市	广东省连州市	江西省景德镇市	中国	小学以下	2016-09-08	2017-03-08	拘留 逮捕	其他存在明确被害人的纠纷 不存在明确被害人的纠纷												0	0	0				1
00123_张某甲盗窃罪一审刑事判决书					0	（2014）辛刑初字第228号	1	张某甲										无业		无业						2014-06-30		逮捕	其他存在明确被害人的纠纷						王旭亮		1		辛集市法律援助中心		0	0	0				1
00124_马战勇故意伤害、故意毁坏财物一审刑事判决书					0	（2016）豫1081刑初708号	1	马战勇	1975-03-08	完全刑事责任能力	1	42			汉族			务农		务农	河南省开封市尉氏县		尉氏县	中国	小学	2016-05-25	2016-12-08		其他存在明确被害人的纠纷												0	0	0
00125_张保军盗窃一审刑事判决书		简易			0	（2018）豫1325刑初27号	1	张保军	1974-11-18	完全刑事责任能力	1	34	0	1	汉族		0				河南省南阳市淅川县		淅川县	中国	小学	2017-10-20	2018-01-05	拘留 逮捕	其他存在明确被害人的纠纷												0	0	0
00126_被告人董某甲犯盗窃罪二审刑事判决书			1		1	（2014）商刑终字第67号	1	董某甲	1978-06-06	完全刑事责任能力	1	36			汉族			务农		务农					文盲	2014-01-04		拘留 逮捕	其他存在明确被害人的纠纷						王红兵		1		商丘市法律援助中心		0	0	0
00127_潘友梯重婚罪一审刑事判决书					0	（2019）浙0327刑初541号	1	潘友梯	1982-03-13	完全刑事责任能力	1	37			汉族			务工		务工		浙江省苍南县	苍南县		小学		2019-05-22		其他存在明确被害人的纠纷												0	0	0
00128_邓立军交通肇事一审刑事判决书					0	（2015）绿刑初字第272号	2	邓立军	1976-03-12	完全刑事责任能力	1	41			汉族						吉林省农安县		吉林省农安县	中国	初中	2015-06-17		逮捕 拘留	其他存在明确被害人的纠纷						王志超	李伟	0	0	吉林衡丰律师事务所	吉林衡丰律师事务所	0	0	0
00129_刘某某、朱某某、张某某三人假冒注册商标一审刑事判决书					0	（2011）莲刑初字第00510号	3	刘XX			1															2010-12-31		拘留 逮捕	不存在明确被害人的纠纷												0	0	0				1
00130_柯某、王某等犯盗窃罪吕某犯掩饰、隐瞒犯罪所得、犯罪所得收益罪一审刑事判决书		简易转普通			0	（2017）鄂0204刑初72号	4	柯某					0	1			0									2016-08-13		拘留 逮捕	其他存在明确被害人的纠纷												0	0	0
00131_孔令威、吴雄等盗窃罪一审刑事判决书					0	（2011）夏刑初字第102号	4	孔令威										无业		无业						2011-01-25	2011-05-25	拘留 逮捕	其他存在明确被害人的纠纷												0	0	0				1
00132_苏新虎非法买卖枪支案一审刑事判决书					0	（2015）绥刑初字第102号	1	苏新虎	1976-06-23	完全刑事责任能力	1	41														2014-09-01	2014-11-12														0	0	0				1
00134_叶志敏寻衅滋事一审刑事判决书					0	（2017）浙1082刑初656号	1	叶志敏	1984-12-18	完全刑事责任能力	1	33	0	1	汉族		0	务农		务农		浙江省临海市	浙江省临海市		初中	2017-01-11	2017-07-06	拘留 逮捕	其他存在明确被害人的纠纷												0	0	0
00135_梁文明故意杀人罪一审刑事判决书					0	（2018）桂0330刑初138号	1	梁文明	1983-09-17	完全刑事责任能力	1	35			汉族			务工		务工	广西壮族自治区桂林市平乐县		广西壮族自治区桂林市平乐县	中国	初中	2018-02-13	2018-09-26	拘留 逮捕	其他存在明确被害人的纠纷						莫宪德		0		广西正宪律师事务所		0	0	0
00137_丁宁、高文武盗窃、诈骗一审刑事判决书					0	（2016）冀0392刑初41号	2	丁宁	1985-02-28	完全刑事责任能力	1	31			满族										初中	2016-06-12	2016-11-24								周少标		0		河北群言律师事务所		0	0	0				1
00138_罗宁、李祥生非法吸收公众存款二审刑事判决书			1		1	（2017）豫05刑终159号	4	罗宁	1986-05-24	完全刑事责任能力	0	31			汉族											2014-10-31		拘留 逮捕	不存在明确被害人的纠纷						常灵芝		0		河南界醒律师事务所		0	0	0
00139_宋某某妨害公务罪一审一审公诉案件适用普通程序刑事判决书					0	（2017）粤0305刑初761号	1	宋某某																		2017-03-08	2017-05-31	拘留 逮捕	其他存在明确被害人的纠纷						谭征		0		广东卓建律师事务所		0	0	0
00140_毛文朗盗窃、合同诈骗，被告人庄杉杉、王子威、黄晓中盗窃一审刑事判决书					0	（2013）港刑初字第260号	4	毛文朗	1983-03-05	完全刑事责任能力	1	30			汉族			无业		无业	福建省闽清县		福建省闽清县	中国	初中	2013-02-05	2013-10-03	拘留 逮捕	其他存在明确被害人的纠纷						张倩雯		0		福建泉中律师事务所		0	0	0
00141_陈儒武盗窃罪一审刑事判决书		普通			0	（2017）琼9003刑初167号	1	陈儒武	1987-11-16	完全刑事责任能力	1	30			汉族			无业		无业		海南省儋州市	儋州市		初中	2017-01-11	2017-04-06	逮捕 拘留	其他存在明确被害人的纠纷												0	0	0				1
00142_吴俊辉、吴志坚走私、贩卖、运输、制造毒品一审刑事判决书					0	（2015）穗中法刑一初字第190号	2	吴俊辉	1976-06-08	完全刑事责任能力	1	39	1	1	汉族		0				广东省佛山市禅城区		广州市越秀区	中国	初中	2014-09-12	2015-05-18	逮捕 拘留	不存在明确被害人的纠纷						丁一元	张巧婷			北京市盈科（广州）律师事务所	北京市盈科（广州）律师事务所	0	0	0
00143_杨桂海强奸一审刑事判决书					0	（2016）皖1225刑初396号	1	杨桂海	1971-08-07	完全刑事责任能力	1	45			汉族			务农		务农		安徽省阜南县	安徽省阜南县		文盲	2016-09-08	2016-12-01	逮捕 拘留	其他存在明确被害人的纠纷						吕俊良	胡兴贵			安徽洪淮律师事务所	安徽洪淮律师事务所	0	0	0
00144_周美清走私、贩卖、运输、制造毒品罪一审刑事判决书		普通			0	（2018）苏0611刑初287号	1	周美清	1970-02-12	完全刑事责任能力	1	48	0	1				无业		无业			江西省修水县			2018-09-03	2018-11-27	逮捕 拘留	不存在明确被害人的纠纷						曹永				北京市炜衡（南通）律师事务所		0	0	0				1		1
00145_曾某犯故意伤害罪一审刑事判决书					0	（2015）东二法刑初字第86号	1	曾某			0		0	0	汉族			无业		无业	广东省五华县		五华县	中国	初中		2014-12-24	取保候审	其他存在明确被害人的纠纷						董全胜				广东尚智和律师事务所		0	0	0
00146_被告人易某某盗窃案一审刑事判决书					0	（2017）湘0602刑初148号	1	易某某	1975-08-04	完全刑事责任能力	1	42			汉族			无业		无业		湖南省岳阳县			初中	2017-01-04	2017-03-27	逮捕 拘留							周勇				湖南惠风律师事务所		0	0	0				1
00147_普忠瑞放火案二审刑事判决书					0	玉中环刑初字第1号	1	普某甲			1															2014-05-28	2015-02-03	逮捕 拘留	其他存在明确被害人的纠纷						郭爱琼				云南李世敏律师事务所		0	0	0
00148_岳喜春诈骗一审刑事判决书		简易转普通			0	（2019）京0113刑初305号	1	岳喜春	1981-02-01	完全刑事责任能力	1	38	1	1	汉族			无业		无业	山东省聊城市冠县	山东省冠县		中国	小学	2018-12-01	2019-03-29	逮捕 拘留	其他存在明确被害人的纠纷						李慧霞		1		北京智勇律师事务所		0	0	0				1	1
00150_李波犯盗窃罪一审刑事判决书		简易转普通			0	（2016）川0923刑初120号	1	李波	1992-04-08	完全刑事责任能力	1	24	1	1	汉族										初中	2016-04-08	2016-08-12	逮捕 拘留	其他存在明确被害人的纠纷												0	0	0
00151_何永新贩卖毒品罪一审刑事判决书		简易			0	（2017）渝0103刑初350号	1	何永新	1993-09-15	完全刑事责任能力	1	24	1	1	汉族		0	无业		无业			重庆市南川区		初中	2017-01-20	2017-04-05	逮捕 拘留	不存在明确被害人的纠纷												0	0	0
00152_何某某贪污、受贿、交通肇事二审刑事判决书		普通		1	0	（2016）粤01刑终1284号	1	何某某	1969-11-18	完全刑事责任能力	1	47			汉族			其他		办公室主任	广州市番禺区	广东省广州市		中国	高等专科学校	2013-09-13		拘留 逮捕 取保候审	其他存在明确被害人的纠纷												0	0	0
00153_徐某、朱某甲、朱某乙盗窃一审刑事判决书					0	（2014）鄱刑初字第198号	3	徐某										务农		务农						2014-10-16	2014-12-01	拘留 取保候审 拘留 逮捕	其他存在明确被害人的纠纷												0	0	0
00154_被告人刘某某贩卖毒品一案一审刑事判决书		简易			0	2017）辽0106刑初520号	1	刘某某			1				满族			无业		无业		辽宁省西丰县	辽宁省西丰县		初中	2017-08-04	2017-08-02	逮捕 取保候审	不存在明确被害人的纠纷						赵航				辽宁同泽律师事务所		0	0	0					1
00155_宁美元、卢辉交通肇事一审刑事判决书					0	（2017）桂1122刑初112号	2	宁美元			1				汉族			务农		务农	广西壮族自治区浦北县	广西壮族自治区浦北县	钟山县	中国	小学	2017-04-25	2017-06-02	逮捕 取保候审 拘留	其他存在明确被害人的纠纷												0	0	0
00157_王某1、昌剑飞盗窃、掩饰、隐瞒犯罪所得、犯罪所得收益一审刑事判决书		普通			0	（2015）泰刑初字第112号	2	王某1	1998-10-20		1	17			汉族			无业		无业		江西省泰和县	江西省泰和县		初中	2015-06-26	2015-09-14	逮捕 拘留	其他存在明确被害人的纠纷						肖莉		1		泰和县法律援助中心		0	0	0
00158_肖某某、李某甲盗窃一审刑事判决书					0	（2015）清佛法刑初字第145号	3	肖某某			1		1	1	汉族		0	务农		务农			广东省佛冈县		小学	2015-09-25	2015-12-04	逮捕 拘留	其他存在明确被害人的纠纷												0	0	0
00159_纪兵贩卖毒品一审刑事判决书		简易			0	（2018）辽0213刑初173号	1	纪兵	1968-02-04	完全刑事责任能力	1	50	0	1									大连市金州区				2018-03-30		不存在明确被害人的纠纷												0	0	0
00160_胥明岗走私、贩卖、运输、制造毒品一审刑事判决书					0	（2015）石刑初字第80号	1	胥明岗	1989-06-12		1	26			汉族						重庆市垫江县		重庆市垫江县	中国	初中	2015-04-17	2015-07-10	逮捕 拘留	不存在明确被害人的纠纷						王平				云南入世律师事务所		0	0	0				1
00161_江某某走私、贩卖、运输、制造毒品一审刑事判决书		简易			0	（2017）鄂0112刑初274号	1	江某某		完全刑事责任能力																2017-02-24	2017-05-16	逮捕 拘留	不存在明确被害人的纠纷												0	0	0
00162_吴清龙强迫卖淫罪一审刑事判决书					0	（2015）江恩法刑初字第6号	1	吴清龙	1986-03-31	完全刑事责任能力	1	29	0	0	汉族			无业		无业					初中	2014-08-10	2014-12-23	逮捕 拘留	其他存在明确被害人的纠纷						黎沛虹				广东顺龙律师事务所		0	0	0				1
00164_吕改玲、张建国盗窃再审刑事判决书		普通	1		0	（2018）豫0322刑再1号	2	吕改玲	1972-03-19	完全刑事责任能力	0	46			汉族			务农		务农			河南省新安县		普通高级中学										赵晨光				河南凯仁律师事务所		0	0	0
00165_贵州黔江医疗器械有限公司、邹金根行贿一审刑事判决书					0	（2017）黔2326刑初17号	2	邹金根	1966-05-15	完全刑事责任能力	1	51			汉族			其他		其他	江西省南昌市进贤县		贵州省贵阳市南明区	中国	初中	2017-11-16	2017-01-18	拘留 取保候审 逮捕	不存在明确被害人的纠纷						邹帮慧	王子旋			贵州权衡律师事务所	贵州权衡律师事务所	0	0	0
00166_何月强盗窃罪一审刑事判决书（2）					0	（2015）铜官刑初字第00035号	1	何月强	1980-06-02	完全刑事责任能力	1	35			汉族						湖南省常德市汉寿县	湖南省汉寿县		中国		2014-12-30	2015-03-04	拘留 逮捕	其他存在明确被害人的纠纷						丁辰		1		铜陵市铜官山区法律援助中心		0	0	0
00167_冯沃安挪用资金、职务侵占、合同诈骗一审刑事判决书					0	（2017）粤2071刑初768号	1	冯沃安	1987-11-15	完全刑事责任能力	1	30			汉族			其他		其他	江门市新会区	广东省江门市		中国	大学本科	2016-07-05	2017-04-05	逮捕 拘留	其他存在明确被害人的纠纷						区健辉	何文慧			广东弘新君睿律师事务所	广东弘新君睿律师事务所	0	0	0
00168_陈新国寻衅滋事罪一审刑事判决书		普通			0	（2015）深宝法刑初字第5092号	1	陈某某	1966-10-27	完全刑事责任能力	1	49			汉族										初中	2015-11-06	2015-12-10	拘留 逮捕	其他存在明确被害人的纠纷												0	0	0
00169_常亮强奸罪一审刑事判决书					0	（2017）吉0322刑初357号	1	常亮	1992-02-26	完全刑事责任能力	1	25			汉族			务农		务农	梨树县	吉林省梨树县	梨树县	中国	小学	2017-07-24	2017-10-13	拘留 逮捕	其他存在明确被害人的纠纷						姜立国				吉林姜立国律师事务所		0	0	0
00170_王太典、颜东斌走私、贩卖、运输、制造毒品一审刑事判决书		简易			0	（2017）闽0102刑初40号	2	王太典	1993-04-04	完全刑事责任能力	1	24	1	1	汉族		0	无业		无业			福建省连江县		初中	2016-11-01	2017-01-10	拘留 逮捕	不存在明确被害人的纠纷												0	0	0
00171_贾振江诈骗一审刑事判决书					0	（2019）赣1024刑初96号	1	贾振江	1957-02-02	完全刑事责任能力	1	62			满族			务农		务农	河北省承德市围场满族蒙古族自治县		天津市武清区	中国	初中	2018-02-07	2019-08-28	取保候审 逮捕 拘留	不存在明确被害人的纠纷												0	0	0
00172_徐某、沈某甲等拒不执行判决、裁定罪，徐某挪用资金罪一审刑事判决书					0	（2014）湖吴刑初字第1494号	3	徐某															浙江省湖州市				2014-12-11								徐学民	费耀，			浙江本佳律师事务所	浙江本佳律师事务所	0	0	0
00173_姚井华、胡世友交通肇事一审刑事判决书					0	（2014）韶武法刑初字第153号	2	姚井华																		2014-05-19	2014-08-19	拘留 逮捕	其他存在明确被害人的纠纷												0	0	0
00174_韦宁波、黎丽非法经营罪一审刑事判决书					0	（2017）桂0105刑初33号	2	韦宁波	1970-12-01	完全刑事责任能力	1	47			壮族			无业		无业			南宁市		大学本科	2016-05-21	2016-12-26	拘留 逮捕	不存在明确被害人的纠纷						韦晨玉				广西祥泰律师事务所		0	0	0				1
00175_向佼、罗凤抢劫一审刑事判决书					0	（2018）粤2071刑初1130号	2	向佼	1990-04-13	完全刑事责任能力	1	28	1	1	汉族			务农		务农					小学	2017-10-24	2018-05-10	逮捕 拘留	其他存在明确被害人的纠纷						彭清华		1		广东盈进律师事务所		0	0	0
00176_李某某故意伤害案一审刑事判决书		普通			0	（2015）青刑初字第196号	1	李某某																			2015-03-30														0	0	0
00177_萧健为亲友非法牟利、曹永泉销售假冒注册商标的商品一审刑事判决书					0	（2018）湘0408刑初150号	2	萧健	1972-12-20		0	46			汉族										硕士研究生		2018-06-19	拘留 取保候审 监视居住	不存在明确被害人的纠纷						刘敏	刘艳			湖南君杰律师事务所	湖南君杰律师事务所	0	0	0				1
00178_刘国元、邵建强合同诈骗二审刑事判决书					0	（2018）粤刑终1392号	2	刘国元	1964-02-24		1	54			汉族			其他		其他	广东省清远市清城区		广东省广州市番禺区	中国	初中	2017-02-24		逮捕 拘留	不存在明确被害人的纠纷						陈珠娜				广东盛世律师事务所		0	0	0
00179_范月秋、王文博聚众斗殴罪一审刑事判决书		简易			0	（2019）浙0522刑初308号	2	范月秋	1989-05-14		1		1	1	汉族		0								小学	2019-03-06	2019-06-12	逮捕 拘留	不存在明确被害人的纠纷						何彩萍	许青叶	1	1	浙江兴长律师事务所	浙江兴长律师事务所	0	0	0				1
00181_胡绍武盗窃一审刑事判决书		简易			0	（2016）云2924刑初266号	1	胡绍武	1984-07-25		1	32			汉族			务农		务农					初中	2016-06-15	2016-11-28	逮捕 拘留	其他存在明确被害人的纠纷												0	0	0				1
00182_邓亮与线某某某非法吸收公众存款罪一审刑事判决书					0	（2014）深罗法刑二初字第147号	2	邓某			1				汉族										硕士研究生	2013-12-04	2014-04-04	逮捕 拘留	其他存在明确被害人的纠纷						魏志敏	朱斌			广东国晖律师事务所	北京市盈科（深圳）律师事务所	0	0	0
00183_李某1、曹某1等盗窃罪一审刑事判决书		普通			0	（2019）甘0723刑初19号	2	李某1					0	0	汉族			其他		其他	金塔县	甘肃省酒泉市金塔县	酒泉市	中国	高等专科学校	2018-11-15	2019-02-01	逮捕 拘留	其他存在明确被害人的纠纷												0	0	0				1
00184_香港永信企业有限公司、吴世民等犯走私普通货物、物品罪一审刑事判决书					0	（2015）常刑二初字第9号	4	吴世民	1961-11-06	完全刑事责任能力	1	54			汉族			其他		其他					高等专科学校	2015-02-15	2015-10-27	逮捕 拘留	不存在明确被害人的纠纷						宋丽萍	刘畅			江苏振和律师事务所	江苏振和律师事务所	0	0	0
00185_陈建禹抢劫罪一审刑事判决书					0	（2018）浙0303刑初649号	1	陈建禹	1971-07-12	完全刑事责任能力	1	47	1	1	汉族			无业		无业					文盲	2017-10-21	2018-06-25	逮捕 拘留	其他存在明确被害人的纠纷						张海啸				浙江东瓯律师事务所		0	0	0
00186_罗进凯、李志斌掩饰、隐瞒犯罪所得、犯罪所得收益、盗窃一审刑事判决书					0	（2017）粤0224刑初119号	2	罗进凯	1985-10-13		1	32			汉族			其他		其他					初中	2017-07-07	2017-09-22	逮捕 拘留	不存在明确被害人的纠纷						朱伟强		1		仁化县法律援助处		0	0	0
00188_王广胜交通肇事一审刑事判决书		简易			0	（2017）皖1822刑初92号	1	王广胜	1969-02-14		1				汉族			其他		其他	安徽省广德县		安徽省广德县	中国	小学		2017-05-02	取保候审 逮捕 拘留	其他存在明确被害人的纠纷												0	0	0				1
00189_李永明、石玲妨害作证、宋敏伪证一案一审刑事判决书					0	（2011）禹刑初字第24号	3	李永明	1962-10-16		1	49														2010-12-09	2011-02-01	逮捕 拘留	不存在明确被害人的纠纷						辩护人崔海杰				河南龙文律师事务所		0	0	0
00190_彭某某非法经营罪一审刑事判决书		简易			0	（2015）云法刑初字第00336号	1	彭某某	1981-04-26	完全刑事责任能力	1	34			汉族			无业		无业	重庆市万州区		重庆市云阳县	中国	初中		2015-10-21	拘留 取保候审	不存在明确被害人的纠纷												0	0	0
00191_余泽妨害公务一审刑事判决书					0	（2018）鄂0204刑初97号	1	余泽	1991-07-26	完全刑事责任能力	1	27			汉族			无业		无业					小学	2017-08-30		逮捕 拘留	其他存在明确被害人的纠纷						孙重阳	金丽莎			湖北人本律师事务所	湖北人本律师事务所	0	0	0
00192_李某骗取贷款、票据承兑、金融票证罪一审刑事判决书					0	（2013）鄂汉南刑初字第00109号	1	李某										其他		其他						2013-03-07	2013-11-25	拘留 逮捕	不存在明确被害人的纠纷						王桂荣	罗文静			湖北金翅律师事务所	湖北金翅律师事务所	0	0	0				1
00193_何志军犯走私、贩卖、运输、制造毒品罪二审刑事判决书					0	（2015）泰中刑终字第00125号	1	何志军																		2014-12-04		逮捕 拘留	不存在明确被害人的纠纷						周光华	韩建成			湖北乾兴律师事务所	江苏奕俊律师事务所	0	0	0
00194_佟永刚等盗窃罪一审刑事判决书					0	（2013）一中刑初字第3101号	2	佟永刚	1975-03-08	完全刑事责任能力	1	38	1	1			0									2013-04-11	2013-07-02	逮捕 拘留	其他存在明确被害人的纠纷												0	0	0				1
00195_岳某某犯抽逃出资罪一审刑事判决书					0	（2013）大刑初字第48号	1	岳某某		完全刑事责任能力			0	1				务农		务农						2013-05-16	2013-07-29	逮捕 拘留	不存在明确被害人的纠纷												0	0	0				1
00196_代剑受贿罪、滥用职权罪一审刑事判决书		普通			0	（2015）九法刑初字第01586号	1	代剑	1963-11-21		1	52			苗族										高等专科学校	2014-12-05	2015-11-23	逮捕 拘留	不存在明确被害人的纠纷						罗明果				重庆向前律师事务所		0	0	0
00197_梁梓俊交通肇事一审刑事判决书					0	（2017）粤2071刑初706号	1	梁梓俊	1993-04-19		1	24			汉族			务工		务工	中山市			中国	大学本科	2017-01-14	2017-03-28	拘留 逮捕	其他存在明确被害人的纠纷						林文清				广东香山律师事务所		0	0	0
00199_沈海朝、彭登变掩饰、隐瞒犯罪所得、犯罪所得收益、盗窃一审刑事判决书		普通			0	（2017）粤0891刑初194号	3	沈海朝	1992-06-06		1	25			汉族			务农		务农		广东省湛江市	广东省湛江市		普通高级中学	2017-01-26	2017-06-27	逮捕 拘留	不存在明确被害人的纠纷						沈远鹊				广东国邦律师事务所		0	0	0
00200_朱某甲、孙某犯侮辱罪一审刑事判决书					1	（2015）睢刑自初字第5号	2	朱某甲										务农		务农															王进				江苏开承律师事务所		0	0	0
00201_冉淑慧故意杀人罪一审刑事判决书					0	（2018）渝03刑初3号	1	冉淑慧	1973-05-14		0	45									丰都县	重庆市丰都县	丰都县	中国		2017-11-16	2018-05-31	逮捕 拘留	家庭纠纷						刘晓东				重庆东龙律师事务所		0	0	0
00202_陆国华盗窃一审刑事判决书		普通			0	（2017）粤1303刑初616号	1	陆国华	1992-05-29	完全刑事责任能力	1	25			汉族										初中	2017-09-18	2017-10-18								人赖建鑫				广东鹏港律师事务所		0	0	0				1
00203_陈倩诈骗一审刑事判决书					0	（2018）黔0422刑初155号	1	陈倩	1981-12-13		0	37			汉族			无业		无业		贵州省安顺市西秀区			中专（包括职业高中，中等专业学校，技工学校）	2016-07-18	2018-09-21	取保候审 逮捕 拘留	其他存在明确被害人的纠纷						田刚	陈俊宇			贵州诺义律师事务所	贵州诺义律师事务所	0	0	0
00204_王吉柱诈骗罪二审刑事判决书					0	（2015）二中刑终字第1029号	1	王吉柱	1965-11-05		1															2015-01-20		逮捕	其他存在明确被害人的纠纷												0	0	0
00205_田某危险驾驶罪刑事判决书					0	（2018）湘0381刑初302号	1	田某	1980-08-17	完全刑事责任能力	1				汉族										初中		2018-08-10	取保候审	不存在明确被害人的纠纷												0	0	0				1
00206_冯云、赵志刚容留他人吸毒一审刑事判决书					0	（2017）赣0203刑初355号	2	冯云	1993-08-24	完全刑事责任能力	1	24			汉族			其他		其他	江西省景德镇市浮梁县			中国	初中	2017-05-05	2017-11-14	逮捕 拘留	不存在明确被害人的纠纷												0	0	0				1
00207_刘中喜、李亚飞虚开增值税专用发票、用于骗取出口退税、抵扣税款发票一审刑事判决书					0	（2019）豫0902刑初75号	3	刘中喜	1964-05-27		1	55			汉族			无业		无业					普通高级中学										范亚菲				河南英搏律师事务所		0	0	0
00208_阎成江非法种植毒品原植物一审刑事判决书					0	（2014）涿刑初字第34号	1	阎成江	1965-05-11	完全刑事责任能力	1	49			汉族			务农		务农	河北省张家口市赤城县			中国	初中	2017-08-11	2014-01-05	逮捕 取保候审 拘留	不存在明确被害人的纠纷												0	0	0
00209_胡某某诈骗、对非国家工作人员行贿一审刑事判决书					0	（2018）冀0702刑初16号	1	胡某某	1980-04-13	完全刑事责任能力	1	38			汉族										普通高级中学	2017-05-17	2018-01-17	逮捕 取保候审 拘留	不存在明确被害人的纠纷						王华	马兆娣			河北经华律师事务所	河北经华律师事务所	0	0	0				1
00210_张永军虚开增值税专用发票、用于骗取出口退税、抵扣税款发票二审刑事判决书			1		0	（2017）冀01刑终334号	1	张永军	1964-09-17		1	53			汉族						河北省三河市		北京市通州区	中国		2015-06-17		逮捕 拘留	不存在明确被害人的纠纷						孙伏龙	刘磊			北京大成（石家庄）律师事务所	北京大成（石家庄）律师事务所	0	0	0
00212_张积云受贿罪等一审刑事判决书					0	（2014）民刑初字第15号	1	张积云	1965-04-26	完全刑事责任能力	1	49			汉族			其他		场长/经理/人大代表		甘肃省山丹县			硕士研究生	2013-08-03	2014-01-04	拘留 逮捕	不存在明确被害人的纠纷						张海	裴延君			甘肃正峰律师事务所	甘肃中天律师事务所	0	0	0
00213_隋渝华、郑祖文、廖小军、张衡平、吴启周犯重大劳动安全事故罪和不报、谎报安全事故罪及张宗华犯不报、谎报安全事故罪一案一审刑事判决书					0	（2018）湘1225刑初75号	6	隋渝华	1943-09-12	完全刑事责任能力	0	76			汉族	1		其他	0	董事长		重庆市江北区			高等专科学校		2018-05-02	取保候审	其他存在明确被害人的纠纷						谢华				湖南正发律师事务所		0	0	0				1	1
00214_王立平诈骗罪一审刑事判决书					0	（2017）吉0781刑初138号	1	王立平	1972-08-03	完全刑事责任能力	1	45	0	0	汉族			务农		务农	扶余市	吉林省扶余市	扶余市	中国	小学	2016-09-21	2017-04-17	拘留 逮捕	其他存在明确被害人的纠纷												0	0	0				1
00215_郑某容留他人吸毒一审刑事判决书		简易			0	刑事判决书 （2016）豫0122刑初75号	1	郑某	1993-10-06	完全刑事责任能力	1	23														2015-11-21	2016-03-01	拘留 逮捕	不存在明确被害人的纠纷												0	0	0
00216_夏泽鹏犯容留他人吸毒罪、非法持有毒品罪等一审刑事判决书		简易			0	（2016）湘0111刑初898号	1	夏泽鹏					1	1				务农		务农		湖南省安化县	湖南省安化县			2016-08-18	2016-12-13	拘留 逮捕	不存在明确被害人的纠纷												0	0	0
00218_易某贩卖毒品一审刑事判决书					0	（2018）沪0116刑初446号	1	易某	1982-09-17	完全刑事责任能力	1	36	0	0	汉族						黄浦区		浦东新区	中国			2018-04-13		不存在明确被害人的纠纷						金某某	朱某某			上海某某律师事务所	上海某某律师事务所	0	0	0
00219_单位上海创馨化妆品有限公司、崔2等走私普通货物、物品一审刑事判决书					0	（2018）沪03刑初6号	4	上海创馨化妆品有限公司															上海市奉浦工业综合开发区				2017-12-25		不存在明确被害人的纠纷						徐郭飞	盛晨			北京大成（上海）律师事务所	北京大成（上海）律师事务所	0	0	0
00220_492唐永兴诈骗罪二审刑事判决书			1		0	（2017）苏09刑终492号	1	唐永兴	1976-02-06	完全刑事责任能力	1	42	0	1	汉族			其他		个体经营	盐城市大丰区		盐城市大丰区	中国	初中	2016-12-27		拘留 逮捕	其他存在明确被害人的纠纷			1	0		赵梁				北京盈科（上海）律师事务所		0	0	0		1	0
00221_王峰敲诈勒索一审刑事判决书					0	（2018）黑0184刑初564号	1	王峰	1964-03-27	完全刑事责任能力	1	54			汉族			无业		无业		黑龙江省五常市	黑龙江省五常市		初中	2018-11-23	2018-12-05	拘留 逮捕	其他存在明确被害人的纠纷						张红				黑龙江恒辰律师事务所		0	0	0
00222_田某某生产、销售有毒、有害食品案一审刑事判决书					0	（2015）濮刑初字第13号	1	田某某			1		0	0													2014-12-22	取保候审	不存在明确被害人的纠纷												0	0	0
00223_周晓波走私、贩卖、运输、制造毒品一审刑事判决书					0	（2018）云04刑初191号	1	周晓波	1975-10-14	完全刑事责任能力	1	43	0	0	侗族			务农		务农		贵州省天柱县	贵州省天柱县		初中	2018-04-11	2018-07-19	拘留 逮捕	不存在明确被害人的纠纷			1	0		王芳				云南识骏律师事务所		0	0	0
00224_486冯艳辉盗窃罪一审刑事判决书		简易			0	（2018）苏1282刑初486号	1	冯艳辉	1990-05-12	完全刑事责任能力	1	28			汉族			务工		务工	郸城县	河南省郸城县	靖江市	中国			2018-09-03	拘留 取保候审	其他存在明确被害人的纠纷						卢昱				江苏硕扬律师事务所		0	0	0
00225_牟泽祯生产、销售不符合安全标准的食品罪一审刑事判决书					0	（2016）吉2403刑初323号	4	牟某某														吉林省敦化市	吉林省敦化市				2016-09-27	监视居住	不存在明确被害人的纠纷												0	0	0
00226_李伟、程默涛诈骗一审刑事判决书		普通			0	（2019）黑0604刑初189号	7	李伟	1978-08-16	完全刑事责任能力	1	41			汉族			其他		经营公司			黑龙江省大庆市萨尔图区		初中	2018-12-19	2019-06-11	拘留 逮捕	其他存在明确被害人的纠纷						肖本春				辽宁坤诚律师事务所		0	0	0
00227_张某犯伪造、变造、买卖国家机关公文、证件、印章罪一审刑事判决书			1		0	（2017）辽1421刑初27号	1	张某																		2016-08-04		拘留 取保候审 监视居住 拘留 逮捕	其他存在明确被害人的纠纷												0	0	0	1	1	0
00228_江瑞莲犯诈骗罪一审刑事判决书					0	（2014）屯刑初字第00109号	1	江瑞莲	1952-06-17	完全刑事责任能力	0	62						其他		个体工商户		安徽省歙县	安徽省黄山市屯溪区		小学	2013-09-27	2014-05-26	拘留 逮捕	其他存在明确被害人的纠纷						朱有志				安徽经盾律师事务所		0	0	0				1
00229_林茜茜诈骗罪，林茜茜盗窃罪一审刑事判决书					0	（2014）温瓯刑初字第211号	1	林茜茜			0															2013-09-14	2014-01-24	拘留 逮捕	其他存在明确被害人的纠纷						吉峰						0	0	0
00230_被告人马汝想犯诈骗罪、招摇撞骗罪一审刑事判决书		普通			0	梅丰法刑初字第159号	1	马汝想		完全刑事责任能力	1				汉族			务工		务工	广东省丰顺县		广东省丰顺县	中国	小学	2015-07-02	2015-10-19	拘留 逮捕	其他存在明确被害人的纠纷 家庭纠纷						何绍基	高旭彤			广东粤顺律师事务所	广东粤顺律师事务所	0	0	0
00231_罗善华贪污、受贿二审刑事判决书			1		0	（2016）赣09刑终125号	1	罗善华	1957-12-12	完全刑事责任能力	0	59			汉族			其他		扶贫办主任、党组书记		江西省万载县	万载县		高等专科学校	2010/9/20#2015/7/29	2016/0/0	拘留 逮捕 取保候审 逮捕	不存在明确被害人的纠纷						易惠新	彭平生			江西华晟律师事务所	江西华晟律师事务所	0	0	0		0	0
00232_陈少君走私、贩卖、运输、制造毒品罪一审刑事判决书		简易			0	（2018）闽0102刑初423号	1	陈少君	1994-07-12	完全刑事责任能力	1	24	1	1	汉族			无业		无业			福建省福州市仓山区		初中	2018-05-23	2018-06-14	拘留 逮捕	不存在明确被害人的纠纷												0	0	0
00233_王璐安拒不执行判决、裁定罪一审刑事判决书		普通			0	（2019）浙1003刑初196号	1	王璐安	1993-08-14	完全刑事责任能力	0	26			汉族			务农		务农		浙江省台州市	台州市黄岩区		小学		2019-04-08	拘留 取保候审	不存在明确被害人的纠纷												0	0	0				1	1
00234_田某某、常某某贷款诈骗一审刑事判决书					0	（2018）豫1481刑初480号	2	田某某	1998-02-09	完全刑事责任能力	1	20			汉族			无业		无业	河南省永城市	河南省永城市	永城市	中国	初中	2018-03-02	2018-05-21	拘留 逮捕	其他存在明确被害人的纠纷												0	0	0				1
00235_李晓诺诈骗一审刑事判决书					0	（2017）京01刑初21号	1	李晓诺	1984-01-29		1	33	1	1							甘肃省秦安县	甘肃省秦安县	北京市朝阳区	中国	初中	2016-08-17	2017-01-05	逮捕	其他存在明确被害人的纠纷						孙颖	田雨鑫			北京百朗律师事务所	北京百朗律师事务所	0	0	0
00236_被告人张某某、祝某某玩忽职守一案一审刑事判决书					0	（2014）宛龙刑初字第605号	2	张某某	1967-12-06	完全刑事责任能力	1	47	0	0													2014-10-29		不存在明确被害人的纠纷						景建超	郭小歌			宛龙律师事务所	宛龙律师事务所	0	0	0
00237_夏益锋强奸一审刑事判决书		普通			0	（2018）湘0104刑初466号	1	夏益锋	1987-07-03	完全刑事责任能力	1	31			汉族			无业		无业		湖南省益阳市	湖南省益阳市赫山区		初中	2017-09-15	2018-05-18	拘留 逮捕	其他存在明确被害人的纠纷												0	0	0
00238_郭某妨害公务一审刑事判决书					0	（2019）豫1403刑初101号	1	郭某	1986-03-02	完全刑事责任能力	0	33	0	0	汉族			无业		无业	夏邑县	河南省夏邑县	商丘市睢阳区	中国	普通高级中学		2019-01-28	拘留 取保候审	其他存在明确被害人的纠纷						焦言言		1		河南永秀律师事务所		0	0	0				1
00239_郑某诈骗罪一审刑事判决书					0	（2014）信刑初字第55号	1	郑某			1		0	0	汉族			其他		经商					高等专科学校	2014-01-23	2016-11-06	拘留 逮捕	其他存在明确被害人的纠纷						田某某				河南英泰律师事务所		0	0	0
00240_杨某某、陈某组织、领导传销活动一审刑事判决书					0	（2014）汕金法刑初字第183号	2	杨某某	1972-09-22	完全刑事责任能力	1	42			汉族								汕头市金平区		初中	2013-09-17	2014-04-08	拘留 逮捕 监视居住	不存在明确被害人的纠纷												0	0	0					1
00241_李双连容留他人吸毒罪一审刑事判决书		简易			0	（2017）渝0242刑初165号	1	李双连	1998-03-29	完全刑事责任能力	1	19											酉阳县			2017-09-05	2017-08-18	取保候审 逮捕	不存在明确被害人的纠纷												0	0	0
00242_王海华一审刑事判决书		速裁			0	（2019）湘0121刑初917号	1	王海华	1976-01-17	完全刑事责任能力	1	43			汉族			务工		务工		湖南省安化县	湖南省安化县		初中		2019/0/0	拘留	不存在明确被害人的纠纷												0	0	0
00243_王浩、段莎虚开发票一审刑事判决书					0	（2017）川1503刑初196号	8	王浩	1982-10-27	完全刑事责任能力	1	35	0	0	汉族						四川省成都市崇州市	四川省崇州市	四川省成都市崇州市	中国	中专（包括职业高中，中等专业学校，技工学校）	2017/4/14#2018/7/8	2017-12-11	逮捕 取保候审 逮捕 拘留	其他存在明确被害人的纠纷						余春霞				四川甲海律师事务所律师		0	0	0
00244_被告人何小茜走私、贩卖、运输、制造毒品罪一审刑事判决书		简易			0	（2016）苏0104刑初985号	1	何小茜	1963-08-01	完全刑事责任能力	0	53			汉族			无业		无业		江苏省南京市	南京市秦淮区		初中	2016-09-20	2016-11-28	拘留 逮捕	不存在明确被害人的纠纷												0	0	0				1
00245_刘文才贩卖毒品罪一审刑事判决书		简易			0	（2017）渝0103刑初587号	1	刘文才	1971-09-03	完全刑事责任能力	1	46	1	1	汉族			无业		无业		重庆市潼南区	重庆市潼南区		初中	2017-04-07	2017-05-24	拘留 逮捕	不存在明确被害人的纠纷												0	0	0
00246_严玉合同诈骗一审刑事判决书		普通			0	（2016）京0113刑初985号	1	严玉	1982-09-01	完全刑事责任能力	1	36			汉族			无业		无业		安徽省桐城市	安徽省桐城市	中国	高等专科学校	2016-03-29	2016-11-24	拘留 逮捕	其他存在明确被害人的纠纷												0	0	0
00247_喻某、唐某1非法生产制毒物品一审刑事判决书					0	（2018）川1403刑初5号	11	喻某	1966-11-27	完全刑事责任能力	1	52	0	1	汉族						四川省资阳市乐至县	四川省乐至县	成都市金牛区	中国	初中	2017-05-24	2018-01-02	逮捕 拘留	不存在明确被害人的纠纷						郑岚	何桃			北京颐合中鸿（成都）律师事务所	四川元绪律师事务所	0	0	0				1
00248_廖志文强奸、非法拘禁一审刑事判决书		普通			0	（2018）湘0124刑初433号	1	廖志文	1989-11-16	完全刑事责任能力	1	29			汉族								湖南省		中专（包括职业高中，中等专业学校，技工学校）	2018-04-12	2018-07-13	拘留 逮捕	其他存在明确被害人的纠纷						傅巍巍				湖南联合天成律师事务所		0	0	0				1
00249_陈文标诈骗一审刑事判决书					0	（2016）粤2071刑初1536号	1	陈文标	1958-12-25	完全刑事责任能力	1	58			汉族			无业		无业	中山市石岐区	广东省中山市		中国	普通高级中学	2015-12-15	2016-07-22	拘留 逮捕	其他存在明确被害人的纠纷												0	0	0
00250_王喆、张燕春诈骗一审刑事判决书					0	（2016）京02刑初74号	2	王喆	1982-04-10	完全刑事责任能力	1	34										北京市	北京市西城区		普通高级中学	2015-08-19	2016/0/0	逮捕	其他存在明确被害人的纠纷						王秀全		1		北京济和律师事务所		0	0	0
00281_昆山市健桥金属材料有限公司、潘启宝虚开增值税专用发票、用于骗取出口退税、抵扣税款发票罪一审刑事判决书		普通			0	（2017）苏0583刑初27号	2	潘启宝	1975-08-28	完全刑事责任能力	1	42	0	0	汉族		0	务工		有限公司法定代表人及实际经营负责人			福建省南平市建阳区			2016-04-27	2017-01-05	拘留 逮捕	不存在明确被害人的纠纷						王依	陈焕青			王依	陈焕青	0	0	0				1
00282_王震故意伤害一审刑事判决书		普通			0	（2019）粤0114刑初698号	1	王震	1986-07-16	完全刑事责任能力	1	33			汉族						河南省信阳市息县			中国	初中	2018-07-27		拘留 逮捕	其他存在明确被害人的纠纷						吴燕玲				广东创盟律师事务所		0	0	0				1
00283_李志文赌博一审刑事判决书					0	（2017）豫0603刑初200号	1	李志文	1988-03-24	完全刑事责任能力	1	29			汉族						河南省鹤壁市山城区		河南省鹤壁市山城区	中国	初中	2017-05-26	2017-08-17	拘留 逮捕	不存在明确被害人的纠纷												0	0	0				1
00284_应彤诈骗一审刑事判决书					0	（2019）豫1303刑初377号	1	应彤		完全刑事责任能力	0	43			汉族			无业		无业	陕西省西安市高陵区		甘肃省兰州市城关区	中国	高等专科学校	2018-11-10	2019-04-01	拘留 逮捕	其他存在明确被害人的纠纷												0	0	0
00285_周红宾放火一审刑事判决书					0	（2016）豫1324刑初388号	1	周红宾	1987-02-15	完全刑事责任能力	1	29			汉族			无业		无业	河南省淅川县		河南省淅川县	中国	文盲	2016-06-01	2016-08-11	拘留 逮捕	其他存在明确被害人的纠纷						梁海龙				河南宛平律师事务所		0	0	0
00286_远向鹏诈骗一审刑事判决书					0	（2017）京0101刑初637号	1	远向鹏	1986-06-24	完全刑事责任能力	1	31														2017-06-01	2017-10-19	逮捕	其他存在明确被害人的纠纷						孙胜				北京市科华律师事务所		0	0	0					0
00287_张士军诈骗罪一审刑事判决书					0	（2014）睢刑初字第426号	1	张士军					1	1				无业		无业						2013-12-04	2014-08-07	拘留 逮捕	其他存在明确被害人的纠纷												0	0	0				1
00288_蒋某某诈骗一审刑事判决书					0	（2017）桂0302刑初102号	1	蒋某某			1																2017-07-12	拘留 逮捕	其他存在明确被害人的纠纷				0		唐建军	易林晖			广西立横律师事务所	广西立横律师事务所	0	0	0				1
00289_陈成清走私、贩卖、运输、制造毒品一审刑事判决书		简易			0	（2018）闽0102刑初341号	1	陈成清	1985-08-25	完全刑事责任能力	1	33	1	1	汉族			无业		无业			福建省古田县		小学	2018-03-27		拘留 逮捕	不存在明确被害人的纠纷						陈峰	郑文华			福建国富律师事务所	福建国富律师事务所	0	0	0
00290_项国友诈骗一审刑事判决书		简易转普通			0	（2017）浙0105刑初636号	1	项国友	1969-09-07	完全刑事责任能力	1	49			汉族			无业		无业	湖北省武穴市			中国	小学	2017-10-20	2017-12-21	拘留 逮捕	其他存在明确被害人的纠纷						卞飞				浙江新台州（杭州）律师事务所		0	0	0
00291_沈经远非法经营二审刑事判决书			1	1	0	（2019）赣01刑终89号	1	沈经远	1977-04-20	完全刑事责任能力	1	42			汉族						湖南省岳阳市湘阴县			中国	初中	2018-09-10		拘留 取保候审 逮捕	其他存在明确被害人的纠纷						徐骥	钟超逸			江西豫章律师事务所	江西豫章律师事务所	0	0	0		0	1
00292_戴某某、陈某某犯贪污罪一审刑事判决书		普通			0	（2015）安刑初字167号	2	戴某某			1				汉族			务农		务农	四川省安县			中国	中专（包括职业高中，中等专业学校，技工学校）		2015-11-17		不存在明确被害人的纠纷	0					周波				四川道融民舟律师事务所		0	0	0
00293_庄艺祥走私、贩卖、运输、制造毒品一审刑事判决书		简易			0	（2017）鄂0116刑初336号	1	庄艺祥	1992-12-07	完全刑事责任能力	1	25			汉族			务工		务工	福建省平和县		福建省厦门市湖里区	中国	小学	2017-03-16	2017-05-18	拘留 逮捕	不存在明确被害人的纠纷						罗海红				湖北天泓律师事务所		0	0	0				1
00294_韦少启猥亵儿童二审刑事判决书				1	0	（2017）桂02刑终152号	1	韦少启	1957-02-26	完全刑事责任能力	1	60			壮族			其他		小学教师	柳州市鱼峰区		柳州市	中国	中专（包括职业高中，中等专业学校，技工学校）	2016-04-23		拘留 逮捕	其他存在明确被害人的纠纷						黎明智	余桂兰			广西广天一律师事务所	广西君行律师事务所	0	0	0		1	0
00295_金熳燃诈骗罪一审刑事判决书		普通			0	辽0202刑初227号	1	金熳燃	1981-09-18	完全刑事责任能力	1	35											辽宁省大连市			2016-02-01	2016-07-28	拘留 监视居住 逮捕	其他存在明确被害人的纠纷						于强				辽宁悦泰律师事务所		0	0	0				1
00296_刘铁亮、门小爱诈骗二审刑事判决书	1		1	1	0	（2018）冀11刑终348号	2	刘铁亮	1973-07-21	完全刑事责任能力	1	45			汉族			务农		务农		河北省涞水县	河北省涞水县		初中	2015-08-14		拘留 逮捕	其他存在明确被害人的纠纷						樊少杰				河北宾鸿律师事务所		0	0	0		1	0
00297_闫全会故意杀人一审刑事判决书			1		0	（2016）冀09刑初27号	1	闫全会	1958-07-09	完全刑事责任能力	1	58			汉族			务农		务农	河北省河间市		河北省河间市	中国	初中	2013-11-19	2014-11-05	拘留 拘留	家庭纠纷						韩文辉	李先生			北京伦辉律师事务所	河北京南律师事务所	0	0	0	1
00298_刘万有诉尤丽娜一案刑事判决书			1		1	（2014）前刑重初字第1号	2	王xx	1965-05-29	完全刑事责任能力	1	49			汉族			其他		干部			吉林省前郭尔罗斯蒙古族自治县				2013-08-13		其他存在明确被害人的纠纷						王XX甲				吉林XX律师事务所		0	0	1	1
00299_徐某某故意伤害二审刑事判决书			1		0	（2018）鲁02刑终179号	1	徐某某																		2017-08-25		拘留 取保候审 逮捕 取保候审	家庭纠纷						郑伟				山东道安律师事务所		0	0	0		1	0	1	1
00300_葛存梅犯集资诈骗罪一审刑事判决书					0	（2014）通中刑二初字第00015号	1	葛存梅		完全刑事责任能力																2014-01-25	2014-11-21	拘留 逮捕	其他存在明确被害人的纠纷						单敏	王伟战	1	1	南通市法律援助中心	江苏启星律师事务所	0	0	0				1	0
00301_被告人裴东信盗窃一案一审刑事判决书		简易			0	（2015）濮刑初字第323号	1	裴东信	1969-08-16	完全刑事责任能力	1	46	1	1	汉族										文盲	2015-07-18	2015-09-02	拘留 逮捕	其他存在明确被害人的纠纷												0	0	0
00302_陈朝阳故意伤害案一审刑事判决书					0	（2015）莆刑初字第48号	1	陈朝阳	1996-04-19	完全刑事责任能力	1	19			汉族						莆田市涵江区	福建省莆田市		中国	初中	2015-03-13	2018-08-14	拘留 逮捕	其他存在明确被害人的纠纷						曾建峰				福建众益律师事务所		0	0	0
00303_苏拉且强奸一审刑事判决书		简易			0	（2018）川3437刑初82号	1	苏拉且	1998-08-01	完全刑事责任能力	1	20	0	0	彝族			务农		务农			四川省雷波县		初中	2018-05-25	2018-08-23	拘留 逮捕	其他存在明确被害人的纠纷						朱国忠				四川德古律师事务所		0	0	0				1
00304_高树春、杨庆春等重大责任事故罪二审刑事判决书			1		0	（2017）冀02刑终914号	4	高树春	1972-10-25	完全刑事责任能力	1	46			汉族			务工		项目经理	河北省唐山市		河北省唐山市	中国	初中			拘留 取保候审 监视居住 取保候审	其他存在明确被害人的纠纷						赵雪刚				河北观峦律师事务所		0	0	0		1	0
00305_陈仕勇与林亚德、黄某某敲诈勒索罪2016刑初504一审刑事判决书					0	（2016）粤0106刑初504号	3	陈仕勇					1	1							广东省化州市	广东省化州市		中国		2015-10-17	2016-03-21	拘留 逮捕	其他存在明确被害人的纠纷						林志雄	郭志杰			广东正大方略律师事务所	广东正大方略律师事务所	0	0	0				1
00306_杨某利用影响力受贿罪，杨某介绍贿赂罪一审刑事判决书	1		1	1	0	（2015）鄂广水刑初字第00124号	1	杨某																		2015-07-15	2013-11-25	拘留 逮捕 取保候审	不存在明确被害人的纠纷						严本道						0	0	0	1
00307_龚军走私、贩卖、运输、制造毒品罪一审刑事判决书		简易			0	（2017）湘0111刑初1191号	1	龚军	1976-06-19	完全刑事责任能力	1	42	1	1	汉族			务农		务农		湖南省双峰县	湖南省双峰县		普通高级中学	2017-09-22	2017-12-23	拘留 逮捕	不存在明确被害人的纠纷												0	0	0
00308_王德钊诈骗罪一审刑事判决书		简易			0	（2019）闽0427刑初184号	1	王德钊	2000-01-29	完全刑事责任能力		19			汉族	0		其他	1	学生	山东省章丘市			中国	高等专科学校	2018-11-28	2019-06-19	拘留 逮捕	其他存在明确被害人的纠纷						陈文				山东全正律师事务所		0	0	0				1
00309_李康华交通肇事一审刑事判决书					0	（2017）粤0904刑初15号	1	李康华	1971-10-12	完全刑事责任能力	1	46			汉族						广东省吴川市		广东省吴川市	中国	普通高级中学	2016-01-29	2017-01-03	拘留 取保候审 拘留 逮捕 取保候审	其他存在明确被害人的纠纷						刘德新	梁菲菲			广东海法律师事务所		0	0	0					1
00310_张伟走私、贩卖、运输、制造毒品一审刑事判决书		简易			0	（2016）津0116刑初20751号	1	张伟	1984-11-17	完全刑事责任能力	1	32										天津市塘沽区				2016-09-02	2016-12-01	拘留 逮捕	不存在明确被害人的纠纷												0	0	0
00311_庄银辉、陈钦洪故意伤害、故意毁坏财物、寻衅滋事一审刑事判决书					0	（2018）粤0513刑初482号	4	庄银辉	1981-05-07	完全刑事责任能力	1	37			汉族			其他		居委会副主任兼治保主任		广东省汕头市	广东省汕头市潮阳区		高等专科学校	2018-05-17	2018-08-09	拘留 逮捕	其他存在明确被害人的纠纷						黄金山	纪树华			广东铭扬律师事务所	广东铭扬律师事务所	0	0	0				1
00312_王承等非法吸收公众存款罪一审刑事判决书					0	（2016）吉0104刑初1040号	4	王承		完全刑事责任能力								其他		有限公司负责人	北京市海淀区		北京市海淀区	中国		2016-02-26		拘留 逮捕	其他存在明确被害人的纠纷						郭浩				吉林衡丰律师事务所		0	0	0				1	1
00313_岩刀龙运输毒品案一审刑事判决书					0	（2018）云23刑初103号	1	岩刀龙	1987-01-13	完全刑事责任能力	1	32	0	0	佤族			务农		务农	云南省西盟佤族自治县		西盟佤族自治县	中国	初中	2018-04-27	2018-09-11	拘留 逮捕	不存在明确被害人的纠纷						宋继荣		1		云南群合律师事务所		0	0	0				1	1
00314_朴晶薇、武艳丽掩饰、隐瞒犯罪所得、犯罪所得收益一审刑事判决书		简易			0	（2017）黑0104刑初765号	2	朴晶薇	1980-06-04	完全刑事责任能力	0	37			朝鲜族			其他		手机店店主		黑龙江省哈尔滨市	黑龙江省哈尔滨市香坊区		高等专科学校	2017-01-20	2017-12-22	拘留 逮捕 取保候审	不存在明确被害人的纠纷						于会泳				黑龙江闻名律师事务所		0	0	0				1
00315_赵红涛、王盼盼故意杀人、聚众斗殴、非法持有、私藏枪支、弹药、窝藏、包庇一审刑事判决书					0	（2018）豫08刑初6号	7	赵红涛	1988-11-06	完全刑事责任能力	1	30	0	0	汉族			无业		无业			河南省焦作市		中专（包括职业高中，中等专业学校，技工学校）	2017-08-07	2018-02-11	拘留 逮捕	其他存在明确被害人的纠纷						赵柱	梁红军			河南好谦律师事务所	河南纳圣律师事务所	0	0	0
00316_熊万平强奸一审刑事判决书					0	（2018）川1523刑初28号	1	熊万平	1988-05-04	完全刑事责任能力	1	30			汉族			务农		务农		四川省江安县			初中	2017-09-26	2018-02-12	拘留 逮捕	其他存在明确被害人的纠纷												0	0	0
00317_何海军故意伤害一审刑事判决书		速裁转普通			0	（2018）京0113刑初167号	1	何海军	1976-10-19	完全刑事责任能力	1	42	1	1	汉族			无业		无业		北京市顺义区	北京市顺义区		小学以下	2017-12-29	2018-01-31	拘留 逮捕	其他存在明确被害人的纠纷						闫丽群		1		北京朗空律师事务所		0	0	0				1
00318_张某某危险驾驶罪一审刑事判决书		速裁			0	（2017）鲁0105刑初130号	1	张某某			1												山东省济南市天桥区																		0	0	0
00319_徐某某盗窃一审刑事判决书		简易			0	（2019）沪0117刑初267号	1	徐某某	1976-10-08	完全刑事责任能力	0	43			汉族						江西省上饶市			中国			2019-02-21		其他存在明确被害人的纠纷						颜美星		1		上海昌鑫律师事务所		0	0	0				1
00320_李佩、谈某犯诈骗罪一审刑事判决书					0	（2015）灵刑初字第00231号	2	李佩	1983-05-10	完全刑事责任能力	1	32			汉族			务农		务农		安徽省灵璧县	安徽省灵璧县			2015-02-17	2015/5/7#2015/7/14	拘留 逮捕	其他存在明确被害人的纠纷												0	0	0
00321_莫焕晶放火罪、盗窃罪一审刑事判决书					0	（2017）浙01刑初121号	1	莫焕晶	1983-07-28	完全刑事责任能力	0	35			汉族			无业		住家保姆	广东省东莞市			中国	普通高级中学	2017-07-01	2017-08-21	拘留 逮捕	其他存在明确被害人的纠纷					1	王晓辉	徐晓明			浙江金道律师事务所	北京东卫（杭州）律师事务所	0	0	0
00322_张全厂抢劫一审刑事判决书					0	（2017）粤51刑初6号	1	张全厂	1986-01-19	完全刑事责任能力	1	31											河南省淮阳县			2016-10-20	2017-01-22	拘留 逮捕	其他存在明确被害人的纠纷												0	0	0
00323_高明生、新平彝族傣族自治县科学技术协会单位受贿二审刑事判决书			1	1	0	（2018）云04刑终34号	3	高明生	1965-02-18	完全刑事责任能力	1	53			汉族			其他		科协主席			云南省新平彝族傣族自治县		硕士研究生			拘留 取保候审	不存在明确被害人的纠纷						李双能				云南红塔律师事务所		0	0	0		1	0
00324_被告人张士强运输毒品一案刑事判决书					0	（2015）大中刑初字第69号	1	张士强	1984-09-13	完全刑事责任能力		31									山东省邹平县		山东省邹平县	中国	初中	2015-01-28	2015-07-16	拘留 逮捕	不存在明确被害人的纠纷						邵迟愚		1		云南富达律师事务所		0	0	0				1
00325_张勇军交通肇事一审刑事判决书			1		0	（2017）皖1225刑初306号	1	张勇军	1991-12-28	完全刑事责任能力	1	27	0	0	汉族							安徽省阜南县	安徽省阜南县		初中	2017-05-23	2017-07-21	拘留 逮捕	其他存在明确被害人的纠纷						程登豹				安徽洪淮律师事务所		0	0	0	1				1
00326_孔某某强奸罪一审刑事判决书					0	（2018）内0525刑初258号	1	孔令权	1947-09-15	完全刑事责任能力	1	71			汉族			务农		务农	内蒙古自治区通辽市奈曼旗		内蒙古自治区通辽市奈曼旗	中国	小学		2018-08-17	监视居住 取保候审	其他存在明确被害人的纠纷						刘国华		1		奈曼旗法律援助中心		0	0	0
00327_郑胜美贩卖毒品一审刑事判决书		简易			0	（2016）渝0106刑初1444号	1	郑胜美			0		1	1												2016-09-30	2016-11-22	拘留 逮捕	不存在明确被害人的纠纷												0	0	0
00328_吴生民挪用公款、受贿案一审刑事判决书		普通			0	（2015）长刑初字第00056号	1	吴生民			1							其他		法庭庭长									其他存在明确被害人的纠纷 不存在明确被害人的纠纷						常贵武	戚保亮			河南万翔律师事务所	河南万翔律师事务所	0	0	0
00329_田素龙危险驾驶一审刑事判决书		简易			0	（2019）沪0112刑初43号	1	田素龙	1972-05-05	完全刑事责任能力	1	47			汉族						山东省单县			中国			2019-01-09														0	0	0
00330_吴殿选、丰社立挪用公款罪一案一审刑事判决书					0	（2013）龙刑初字第44号	2	吴殿选			1															2013-08-31	2013-05-02	拘留 逮捕	其他存在明确被害人的纠纷			1	0		朱明勇				北京市中关律师事务所		0	0	0
00331_陈锐斌诈骗罪一审刑事判决书					0	（2015）潮安法刑初字第756号	1	陈锐斌	1988-11-15	完全刑事责任能力	1	28			汉族			无业		无业	广东省汕头市金平区		广东省汕头市金平区	中国	小学	2015-06-19	2015-12-09	拘留 逮捕							林忠生	张秋松			广东众大律师事务所	广东众大律师事务所	0	0	0				1
00332_蒋甫顺等人受贿一案二审刑事判决书			1		0	（2013）桂市刑二终字第126号	3	上诉人																											王宏卫				广西桂山律师事务所		0	0	0		1	0
00333_魏列荣故意伤害一审刑事判决书					0	（2017）粤52刑初85号	1	魏列荣	1945-02-18	完全刑事责任能力	1	73	0	0	汉族			无业		无业	广东省揭阳市		广东省揭阳市榕城区	中国	小学	2017-05-04	2017-11-22	拘留 逮捕	其他存在明确被害人的纠纷						许杰华	黄惠堎			广东榕江律师事务所	广东榕江律师事务所	0	0	0					1
00334_杨某走私、贩卖、运输、制造毒品一审刑事判决书		普通			0	（2017）鲁0211刑初915号	1	杨某	1966-02-04	完全刑事责任能力	1	51	1	1	汉族			无业		无业			山东省青岛市市南区			2017-04-06	2017-07-12	拘留 逮捕	不存在明确被害人的纠纷												0	0	0				1
00335_被告人韩某贩卖毒品一案一审刑事判决书		简易			0	（2016）陕0103刑初542号	1	韩某		完全刑事责任能力	1		1	1												2016-07-12	2016-10-14	拘留 逮捕	不存在明确被害人的纠纷												0	0	0				1
00336_陈伟发故意杀人一审刑事判决书					0	（2018）闽06刑初38号	1	陈伟发	1969-12-28	完全刑事责任能力	1	49			汉族			务农		务农		福建省长泰县	福建省长泰县			2018-01-12	2018-07-02	拘留 逮捕	其他存在明确被害人的纠纷						薛贵滨	许雅萍			福建九鼎律师事务所	福建九鼎律师事务所	0	0	1
00337_曾海涵非法经营二审刑事判决书			1		0	（2015）韶中法刑二终字第55号	1	曾海涵	1978-05-17	完全刑事责任能力		39										江西省赣州市	江西省赣州市章贡区		大学本科	2013-02-01		拘留 逮捕 取保候审							游北灵	吴新标			广东众同信律师事务所	广东国智律师事务所	0	0	0	1	1	0
00338_何某、左某非法持有、私藏枪支、弹药、故意伤害二审刑事判决书			1		0	（2016）黔01刑终1033号	2	何某	1987-07-16	完全刑事责任能力	1	29			汉族			其他		其他		贵州省黔南布依族苗族自治州龙里县	贵州省黔南布依族苗族自治州		初中	2016-04-07		拘留 逮捕	其他存在明确被害人的纠纷												0	0	0		1	0
00339_被告人李某某贩卖毒品一案一审刑事判决书		简易			0	（2017）辽0106刑初667号	1	李某某	1986-12-12	完全刑事责任能力	1	31			汉族			无业		无业	辽宁省沈阳市铁西区			中国	小学	2017-08-04		拘留 逮捕	不存在明确被害人的纠纷												0	0	0
00340_李亮、鲁帮庆虚开发票一审刑事判决书		简易			0	（2017）浙0603刑初651号	4	李亮	1985-02-28	完全刑事责任能力	1	32			汉族			其他		居民			上海市杨浦区		中专（包括职业高中，中等专业学校，技工学校）	2017-09-11	2017-08-28	拘留 取保候审 逮捕	不存在明确被害人的纠纷						李剑瑜	王世其			上海豪珈律师事务所	上海申拓律师事务所	0	0	0				1
00341_朱华清走私、贩卖、运输、制造毒品罪一审刑事判决书		简易			0	（2017）苏0509刑初600号	1	朱华清	1976-12-20	完全刑事责任能力	1	41	0	1	汉族			无业		无业			江苏省沭阳县		小学	2017-05-07	2017-04-27	取保候审 逮捕	不存在明确被害人的纠纷												0	0	0
00342_重庆蓉泰塑料有限公司刘建设拒不执行判决、裁定罪一审刑事判决书					0	（2017）渝0117刑初117号	2	刘建设	1960-05-27	完全刑事责任能力	1	57			汉族			其他		公司法定代表人		四川省岳池县	重庆市九龙坡区		初中		2017-03-08	拘留 取保候审	不存在明确被害人的纠纷						赵志春				重庆美翎律师事务所		0	0	0					1
00343_苏才故意杀人二审刑事判决书	1			1	0	（2017）粤刑终1644号	1	苏才	1975-06-15	完全刑事责任能力	1	43						其他		客运司机		广东省化州市	广东省化州市		初中	2016-10-26		拘留 监视居住 逮捕	其他存在明确被害人的纠纷						杨文良		1		广东文业律师事务所		0	0	0		1	0
00344_李奎犯故意杀人罪一审刑事判决书					0	（2015）浙杭刑初字第140号	1	李奎																		2015-05-08	2015-08-25	拘留 逮捕	其他存在明确被害人的纠纷						林洪春						0	0	0
00345_谢作旭抢劫罪一审刑事判决书					0	（2015）浙温刑初字第189号	1	谢作旭	1985-01-21	完全刑事责任能力	1	30			汉族			务农		务农		浙江省乐清市	浙江省乐清市		普通高级中学	2015-07-24	2015-11-02	拘留 逮捕	其他存在明确被害人的纠纷						缪长希				北京大成（温州）律师事务所		0	0	0
00346_温某2、温某3、温某1等故意伤害罪一审刑事判决书					0	（2017）闽08刑初59号	1	詹权光	1985-11-07	完全刑事责任能力	1	33			汉族			无业		无业	广东省饶平县	广东省饶平县	福建省龙岩市新罗区	中国	初中	2017-09-02	2017-12-01	拘留 逮捕	其他存在明确被害人的纠纷						施丽仙		1		福建诺佳律师事务所		0	0	1				1
00347_吴顺波走私、贩卖、运输、制造毒品一审刑事判决书					0	（2017）黔2631刑初242号	1	吴顺波	1997-10-23	完全刑事责任能力	1	20			侗族						贵州省黎平县			中国	初中	2017-07-20	2017-10-19	拘留 逮捕	不存在明确被害人的纠纷												0	0	0				1
00348_张某、施莉等抢劫罪一审刑事判决书					0	（2014）鄂硚口刑初字第00006号	5	张某										无业		无业						2013-09-17	2013-12-23	拘留 逮捕	其他存在明确被害人的纠纷						段明				湖北鼎君律师事务所		0	0	0				1
00349_庄某某,林某某,刘某某,杨某某,黄某某非法经营罪案刑事判决书					0	（2015）深罗法刑二初字第241号	5	庄某某					1	1												2015-03-20	2015-08-26	拘留 逮捕	不存在明确被害人的纠纷						刘朝晖				广东联睿律师事务所		0	0	0
00350_沈某某犯交通肇事罪一审刑事判决书					0	（2016）闽0626刑初87号	1	沈某某										无业		无业						2016-06-02	2016-07-28	拘留 逮捕	其他存在明确被害人的纠纷												0	0	1
00351_王正国诈骗一审刑事判决书					0	（2016）吉0503刑初64号	1	王正国			1				汉族			无业		无业	北京市丰台区		北京市丰台区	中国		2016-03-22	2016-06-16	拘留 逮捕	其他存在明确被害人的纠纷						张雪峰				北京京师律师事务所		0	0	0
00352_林克福强奸一审刑事判决书					0	2016）浙0327刑初1520号	1	林克福	1986-05-01	完全刑事责任能力	1	30			汉族			无业		无业			苍南县		初中	2016-08-12	2016-11-21	拘留 逮捕	其他存在明确被害人的纠纷						庄益探				浙江正昌律师事务所		0	0	0
00353_胡发来故意杀人、危险驾驶一审刑事判决书					0	（2016）闽08刑初47号	1	胡发来	1974-12-22	完全刑事责任能力	1	43	0	0	汉族			务工		务工	武平县	福建省武平县		中国		2016-06-24	2016-10-08	取保候审 拘留 逮捕	不存在明确被害人的纠纷						李秉强		1		福建金磊律师事务所		0	0	0				1
00354_向浩等集资诈骗一审刑事判决书					0	（2018）京01刑初72号	2	向浩	1975-09-20	完全刑事责任能力	1	43			土家族	0		其他	0	有限公司市场总监	湖北省恩施市	湖北省恩施市		中国	初中	2017-10-18	2018-07-03	逮捕	其他存在明确被害人的纠纷						张富强				河北崇州律师事务所		0	0	0
00355_黄某1、黄某2诈骗一审刑事判决书			1		0	（2017）川1602刑初313号	3	黄某1	1993-03-18	完全刑事责任能力	0	24			汉族			无业		无业	四川省广安市邻水县		四川省广安市邻水县	中国	初中	2017-07-31	2017-10-31	取保候审 逮捕 取保候审	其他存在明确被害人的纠纷												0	0	0					1
00356_龙某某、沈德鑫非法制造、买卖、运输、邮寄、储存枪支、弹药、爆炸物二审刑事判决书					0	（2018）黔01刑终294号	2	龙某某	1989-12-23	完全刑事责任能力	1	29	0	0	布依族			务工		务工	贵州省贵阳市南明区			中国	初中	2017-09-30		拘留 逮捕	不存在明确被害人的纠纷												0	0	0		1		1
00357_曹兴阳盗窃一审刑事判决书		普通			0	（2017）湘0304刑初123号	1	曹兴阳	1988-11-10	完全刑事责任能力	1	29			汉族			无业		无业	湖北省荆门市		湖北省荆门市	中国	小学	2017-03-31	2017-04-20	拘留 逮捕	其他存在明确被害人的纠纷						刘恋		1		湖南人和人（湘潭）律师事务所		0	0	0				1
00358_苏好汉受贿、挪用公款一审刑事判决书					0	（2016）皖1322刑初477号	1	苏好汉	1974-07-20	完全刑事责任能力	1	43			汉族			其他		党工委副书记、纪检书记		宿州市埇桥区			高等专科学校		2016-11-10	拘留 逮捕 取保候审	不存在明确被害人的纠纷						王景懿	颜婕			安徽君光律师事务所	辩护人	0	0	0
00359_尹燕林交通肇事一审刑事判决书		普通			0	（2018）赣0830刑初213号	1	尹燕林	1958-04-08	完全刑事责任能力	1	60	0	0	汉族			务工		务工		江西省永新县	永新县		普通高级中学	2018/4/16#2018/12/6	2018-12-06	拘留 逮捕 取保候审 逮捕	其他存在明确被害人的纠纷												0	0	0
00360_梁广锋、梁杰故意伤害、走私、贩卖、运输、制造毒品、非法持有、私藏枪支、弹药、妨害公务一审刑事判决书					0	（2015）云中法刑一初字第26号	3	梁广锋	1987-12-18	完全刑事责任能力	1	28			汉族			无业		无业		广东省广州市	广州市白云区		小学	2014-11-14	2015-07-29	拘留 逮捕	其他存在明确被害人的纠纷						朱建文				广东刚毅律师事务所		0	0	0
00361_资和生故意杀人罪一审刑事判决书					0	（2016）云03刑初18号	1	资和生	1976-04-28	完全刑事责任能力	1	40			汉族							云南省曲靖市麒麟区	云南省曲靖市麒麟区		初中	2015-09-24	2016-01-29	拘留 逮捕	其他存在明确被害人的纠纷						朱朝光				云南天志律师事务所		0	0	0				1
00362_何某某、马某甲、马某乙开设赌场案一审刑事判决书		普通			0	（2014）西刑初字第219号	3	何某某			1															2014-05-16	2014-08-28	拘留 逮捕	不存在明确被害人的纠纷						喻银根				河南龙城律师事务所		0	0	0
00363_苏华波交通肇事一审刑事判决书					0	（2016）粤1521刑初263号	1	苏华波	1972-05-06	完全刑事责任能力	1	45			汉族			其他		其他	广东省海丰县		海丰县	中国		2016-05-05	2016-08-01	拘留 逮捕	其他存在明确被害人的纠纷 不存在明确被害人的纠纷												0	0	0					1
00364_林某3、林某4交通肇事二审刑事判决书			1		0	（2018）闽01刑终873号	1	陈伟伟	1990-06-01	完全刑事责任能力	1	28			汉族			其他		其他	平潭县	福建省平潭县	平潭县	中国	高等专科学校	2018-03-06		拘留 逮捕	其他存在明确被害人的纠纷						欧存华	欧和伟			福建中亚海天律师事务所	福建中亚海天律师事务所	0	0	1		1	0
00365_任某交通肇事罪一审刑事判决书		简易			0	（2014）深龙法刑初字第1901号	1	任某	1985-07-17	完全刑事责任能力	1	29			汉族						四川省			中国	初中	2013-12-20	2014-07-04	拘留 逮捕	其他存在明确被害人的纠纷						刘某				广东某律师事务所		0	0	0
00366_林某1、严琪故意伤害罪一审刑事判决书		普通			0	（2019）浙1102刑初700号	1	严琪	1982-02-28	完全刑事责任能力	1	37		1	汉族							浙江省景宁畲族自治县	浙江省景宁畲族自治县		小学	2019-08-29	2019-12-02	拘留 逮捕	其他存在明确被害人的纠纷						金志勇		1		丽水市莲都区法律援助中心		0	0	1
00367_董利鸿危险驾驶一审刑事判决书					0	（2018）鲁1083刑初50号	1	董利鸿	1968-04-10	完全刑事责任能力	1	50			汉族			无业		无业	天津市河北区	天津市河北区	山东省乳山市	中国	高等专科学校	2018-03-12	2018-01-22	取保候审 逮捕													0	0	0
00368_谭维文、熊黎合同诈骗一审刑事判决书					0	（2016）鄂01刑初106号	4	谭维文	1985-10-18	完全刑事责任能力	1	32			汉族			其他		公司副总经理		湖北省建始县	湖北省恩施市		大学本科	2015-04-24	2016-05-16	拘留 逮捕	其他存在明确被害人的纠纷						陆海	董德政			北京金台律师事务所	北京金台律师事务所	0	0	0
00369_周拥军抢夺一审刑事判决书					0	（2017）渝0152刑初119号	1	周拥军	1974-08-12	完全刑事责任能力	1	43		1	汉族								重庆市潼南区			2017-03-02	2017-04-19	拘留 逮捕	其他存在明确被害人的纠纷												0	0	0
00370_张某交通肇事一审刑事判决书		普通			0	（2015）珠金法刑初字第68号	1	张某			1				汉族						贵州省贵阳市南明区		广东省珠海市	中国	初中	2014-05-30	2015-01-12	拘留 逮捕	其他存在明确被害人的纠纷			1			文学军				广东海鸥律师事务所		0	0	0
00371_19刑初132号屈景辉交通肇事罪一审刑事判决书		简易			0	（2019）闽0526刑初132号	1	屈景辉	1954-09-25	完全刑事责任能力	1	65			汉族			务工		务工	重庆市江津区	重庆市江津区	福建省永春县	中国	初中	2019-05-27	2019-04-25	拘留 取保候审 逮捕	其他存在明确被害人的纠纷												0	0	0				1
00372_濮阳市正凰投资有限公司濮阳县分公司、北京正凰投资基金管理有限责任公司非法吸收公众存款再审刑事判决书	1				0	（2016）豫0928刑再1号	5	濮阳市正凰投资有限公司濮阳县分公司															濮阳县						其他存在明确被害人的纠纷												0	0	0		0	1
00373_蔡某、林某抢劫、强奸再审刑事判决书					0	（2018）粤0512刑再1号	2	蔡某	1990-11-21	完全刑事责任能力	1	28			汉族								汕头市潮阳区		初中	2012-04-28		拘留 逮捕	其他存在明确被害人的纠纷						郑金才				汕头市濠江区公职律师事务所		0	0	0		1		1
00374_周军盗窃罪刑事判决书					0	（2017）渝0108刑再3、4号	1	周军	1976-01-01	完全刑事责任能力	1	42	1	1	汉族			务农		务农			重庆市		初中				其他存在明确被害人的纠纷												0	0	0
00375_罗华林以危险方法危害公共安全、寻衅滋事二审刑事判决书			1		0	（2019）粤刑终277号	1	罗华林	1997-01-08	完全刑事责任能力	1	22			汉族						广东省湛江市廉江市	广东省廉江市		中国	初中	2017-09-27		拘留 逮捕							梁楚海	姚兴苗			广东博格律师事务所	广东博格律师事务所	0	0	0		1		1	1
00376_林某故意伤害二审刑事判决书			1		0	（2018）粤09刑终359号	1	林某	1959-12-23	完全刑事责任能力	1	59			汉族								广东省化州市		普通高级中学	2016/3/22#2017/9/26		拘留 逮捕 逮捕	邻里矛盾						张帆				广东汇俊律师事务所		0	0	0		1
00377_屈景辉交通肇事罪二审刑事判决书			1		0	（2019）闽05刑终1068号	1	屈景辉	1954-09-25	完全刑事责任能力	1	65			汉族			务工		务工	重庆市江津区	重庆市江津区	福建省泉州市永春县	中国	初中	2019-05-27		拘留 取保候审 逮捕	其他存在明确被害人的纠纷												0	0	0			1		1
00378_黄道俊、项秀丽非法吸收公众存款罪一审刑事判决书	1	普通			0	（2017）浙0302刑初323号	2	黄道俊	1964-04-16	完全刑事责任能力	1	54			汉族			其他		经商		温州市	温州市鹿城区		普通高级中学	2016-06-14	2017-03-17	拘留 逮捕	其他存在明确被害人的纠纷						金克明	黄荣强			浙江金克明律师事务所	浙江金克明律师事务所	0	0	0
00379_卓某走私、贩卖、运输、制造毒品罪，卓某非法买卖制毒物品罪一审刑事判决书					0	（2013）深宝法刑初字第3105号	1	卓某																		2013-05-17	2013-10-09	拘留 逮捕	不存在明确被害人的纠纷						黄宗汉				广东德纳律师事务所		0	0	0
00380_苏州福纳科技股份有限公司、范小天单位行贿一案一审刑事判决书	1				0	（2016）皖0405刑初69号	2	苏州福纳文化科技股份有限公司															江苏省苏州市昆山市				2016-06-16		不存在明确被害人的纠纷						芮敏				江苏益和律师事务所		0	0	0
00381_朱贤恩犯强奸罪一审刑事判决书		简易			0	（2010）甬象刑初字第516号	1	朱贤恩	1980-09-26	完全刑事责任能力	1	30			汉族			务农		务农		浙江省象山县	象山县		初中	2010-07-22	2010-10-23	拘留 逮捕	其他存在明确被害人的纠纷						周奇嵩				浙江素豪律师事务所		0	0	0
00382_郝小光集资诈骗罪一审刑事判决书					0	（2017）冀0203刑初297号	1	郝小光	1980-01-19	完全刑事责任能力	1	37	0	1	汉族			其他		超市负责人	河北省唐山市	河北省唐山市	河北省唐山市	中国	初中	2017-02-17	2017-10-30	拘留 逮捕	其他存在明确被害人的纠纷						高辉	王世杰			河北福航律师事务所	河北鸿翔律师事务所	0	0	0
00383_徐鑫奎放火罪一审刑事判决书					0	（2018）浙0624刑初358号	1	徐鑫奎	1952-02-18	完全刑事责任能力	1	65	0	0	汉族			务农		务农	新昌县	浙江省新昌县	新昌县	中国	小学	2018-04-09	2018-09-14	拘留 逮捕	其他存在明确被害人的纠纷						丁晓锋				浙江泽大（新昌）律师事务所		0	0	0				1
00384_冯建森、张小娟合同诈骗一审刑事判决书		普通			0	（2018）豫0526刑初195号	2	冯建森	1985-12-10	完全刑事责任能力	1	33			汉族			务农		务农	河南省滑县		滑县	中国	初中	2017-08-30	2017/0/0#2018/0/0	拘留 逮捕	其他存在明确被害人的纠纷						李冬				河南鼎维律师事务所		0	0	0
00385_林某平交通肇事一审刑事判决书					0	（2017）粤5202刑初543号	1	林某平	1994-12-01	完全刑事责任能力	1	24	0	0	汉族						广东省揭阳市		揭阳市	中国	初中	2017-06-23	2017-10-09	拘留 逮捕	其他存在明确被害人的纠纷						许洁伟	杨灯煜			广东冠法律师事务所	广东冠法律师事务所	0	0	1				1
00386_杜智军、吴发有走私、贩卖、运输、制造毒品一审刑事判决书					0	（2018）云09刑初186号	3	杜智军	1979-02-09	完全刑事责任能力	1	39	1	1	汉族			无业		无业			四川省乐山市市中区		初中	2017-06-23	2018-03-22	拘留 逮捕	不存在明确被害人的纠纷						王莲峰				镇康县法律援助中心		0	0	0
00388_阿五十四盗窃一审刑事判决书		简易			0	格刑初字第117号	1	阿五十四	1979-11-14	完全刑事责任能力	1	35	1	1	藏族											2014-02-28	2014-05-27	拘留 逮捕	其他存在明确被害人的纠纷												0	0	0
00389_景爱民犯故意杀人罪、非法持有枪支罪一案刑事判决书			1		0	（2017）晋08刑初24号	1	景爱民	1979-06-18	完全刑事责任能力	1	38			汉族			务农		务农						2013-12-31		拘留 逮捕	其他存在明确被害人的纠纷						朱帅	郭娜			山西弘韬律师事务所	山西弘韬律师事务所	0	0	1
00390_周余强职务侵占罪再审刑事判决书	1		1	1	0	（2014）泰中刑再初字第0001号	1	周余强	1966-07-12	完全刑事责任能力	1	48			汉族			其他		公司经理	江苏省泰州市姜堰区			中国		2006-03-01	2010-05-04	拘留 逮捕							耿延	栾云根			江苏诺法律师事务所	江苏诺法律师事务所	0	0	0		1
00391_郭某清犯贩卖毒品罪刑事判决书		简易			0	（2017）粤0303刑初1881号	1	郭某清					1	1													2017/0/0														0	0	0				1		1
00392_陈爱红诈骗罪一审刑事判决书		简易			0	（2017）青0103刑初359号	1	陈爱红	1982-06-25	完全刑事责任能力	0	35			汉族			无业		无业	青海省西宁市	青海省门源回族自治县	青海省西宁市	中国	初中	2017-06-21	2017-10-24	拘留 逮捕	其他存在明确被害人的纠纷												0	0	0				1
00393_福州市鼓楼区琴台娱乐城、彭某1、熊某等故意伤害罪二审刑事判决书			1		0	（2019）闽刑终87号	1	池信干	1975-07-11	完全刑事责任能力	1	44			汉族			其他		夜总会保安	福建省顺昌县	福建省闽侯县	福建省福州市鼓楼区	中国	初中	2017-08-08		拘留 逮捕	其他存在明确被害人的纠纷												0	0	1		1
00394_李磊走私、贩卖、运输、制造毒品一审刑事判决书		简易			0	（2017）鄂0116刑初210号	1	李磊	1986-02-26	完全刑事责任能力	1	31			汉族			无业		无业			武汉市黄陂区		初中	2017-01-19	2017/0/0	拘留 逮捕	不存在明确被害人的纠纷												0	0	0				1
00395_姚彪故意伤害一审刑事判决书					0	（2018）皖01刑初43号	1	姚彪	1992-07-10	完全刑事责任能力	1	36			汉族						安徽省界首市	安徽省界首市	安徽省合肥市庐阳区	中国	初中	2018-03-27	2018-07-11	拘留 逮捕	家庭纠纷						张如谦				安徽协利律师事务所		0	0	1				1	1
00396_罗华林以危险方法危害公共安全、寻衅滋事一审刑事判决书					0	（2018）粤08刑初37号	1	罗华林	1997-01-08	完全刑事责任能力	1	21			汉族							广东省廉江市	廉江市		初中	2017-09-27	2018-03-26	拘留 逮捕	其他存在明确被害人的纠纷						陈卫华		1		广东民怡律师事务所		0	0	0
00397_林博霖、林约贝克故意伤害、寻衅滋事、非法持有、私藏枪支、弹药一审刑事判决书					0	（2017）粤0515刑初188号	3	林博霖			1		1	1	汉族			无业		无业	广东省汕头市澄海区	广东省汕头市澄海区		中国	小学	2016-07-04	2017-03-03	拘留 逮捕	其他存在明确被害人的纠纷						许锦荣	洪佳盛			广东广伦律师事务所	广东广伦律师事务所	0	0	0				1
00398_张某某等五人盗窃罪一审刑事判决书		简易			0	（2016）陕0825刑初305号	4	张某甲			1				汉族			务农		务农					小学	2016-08-03	2016-12-20	拘留 逮捕	其他存在明确被害人的纠纷												0	0	0				1	1
00399_被告人贺四妹非法经营罪一审刑事判决书		简易			0	（2017）湘8603刑初17号	1	贺四妹	1972-09-11	完全刑事责任能力	0	45			汉族			无业		无业		湖南省洪江市	怀化市鹤城区		初中	2017-06-20	2017-07-24	拘留 逮捕 取保候审	不存在明确被害人的纠纷												0	0	0					1
00400_原审被告人夏盗窃一案再审刑事广海判决书刑事判决书				1	0	（2015）齐刑抗字第3号	1	夏广海	1989-12-18	完全刑事责任能力	1	26	1	1	汉族			无业		无业					小学	2014-02-11		拘留 逮捕													0	0	0
00401_焦某1、焦某2开设赌场一审刑事判决书					0	（2018）粤1202刑初5号	7	焦某1	1976-08-15	完全刑事责任能力	1	42			汉族						广东省肇庆市高要区		肇庆市端州区	中国	初中	2017-10-19	2017-12-26	拘留 逮捕	不存在明确被害人的纠纷						李谦	吕雯雯			广东天量律师事务所	广东天量律师事务所	0	0	0				1
00402_石保贵、蒋松涛、龙志华、胡某某组织、领导传销活动案一审刑事判决书					0	（2017）湘0726刑初13号	4	石保贵	1980-03-11	完全刑事责任能力	1	38			汉族										普通高级中学	2016-06-22	2017-02-06	拘留 逮捕							姚军				湖南天门律师事务所		0	0	0
00403_张某走私、贩卖、运输、制造毒品一审刑事判决书		简易			0	（2018）沪0106刑初1147号	1	张某	1964-10-22	完全刑事责任能力	1	54			汉族						天津市		上海市	中国			2018-10-08		不存在明确被害人的纠纷						周菁华		1		上海市光明律师事务所		0	0	0
00404_伍锡阳非法持有、私藏枪支、弹药罪二审刑事判决书			1		0	（2019）湘04刑终17号	1	伍锡阳	1971-12-29	完全刑事责任能力	1	48			汉族			务农		务农		湖南省祁东县	祁东县		小学	2018-11-09		拘留 取保候审 逮捕	不存在明确被害人的纠纷												0	0	0		1		1	1
00405_邱熠妨害公务罪一审刑事判决书					0	（2019）闽0802刑初432号	1	邱熠	1987-11-03	完全刑事责任能力	1	32	0	1	汉族			无业		无业	龙岩市新罗区	福建省龙岩市新罗区		中国	初中	2019-03-15	2019-05-31	拘留 逮捕	其他存在明确被害人的纠纷						陈文慧				福建力涵律师事务所		0	0	0				1
00406_刘某某危险驾驶一审刑事判决书		简易			0	（2014）清刑初字第80号	1	刘某某	1981-10-03	完全刑事责任能力	1	33			汉族			无业		无业					初中		2014-12-03	取保候审	不存在明确被害人的纠纷												0	0	0				1	1
00407_王某某非法占有农用地一审刑事判决书					0	（2015）黄刑初字第170号	1	王某某	1960-09-20	完全刑事责任能力	1	56			汉族			其他		公司法定代表人	山东省青岛市黄岛区	山东省青岛市黄岛区	山东省青岛市黄岛区	中国	普通高级中学	2014-05-30	2014-12-25	拘留 逮捕	不存在明确被害人的纠纷						孙文峰				河南正乾坤律师事务所		0	0	0
00408_536周新军危险驾驶罪一审刑事判决书		简易			0	（2019）苏0282刑初536号	1	周新军	1977-01-05	完全刑事责任能力	1	42			汉族			无业		无业	宜兴市		宜兴市	中国	高等专科学校		2019-05-13	取保候审	不存在明确被害人的纠纷												0	0	0				1		1
00409_王青犯交通肇事罪一审刑事判决书					0	（2016）鲁0285刑初338号	1	王青	1972-02-12	完全刑事责任能力	1	44						务农		务农		山东省莱西市				2016-03-11	2016-06-06	拘留 逮捕	其他存在明确被害人的纠纷						于坚夫				山东昌阳律师事务所		0	0	0					1
00410_陈昌碧、吴贵华诈骗再审刑事判决书			1		0	（2016）黔01刑再终4号	4	陈昌碧	1965-05-18	完全刑事责任能力	0	52			汉族			务农		务农		贵州省贵阳市	贵州省贵阳市		文盲	2015-03-24		拘留 逮捕	其他存在明确被害人的纠纷												0	0	0		1
00411_张建民故意伤害一审刑事判决书		简易转普通			0	（2018）京0113刑初1009号	1	张建民	1967-02-28	完全刑事责任能力	1	52			汉族			务农		务农	内蒙古自治区锡林郭勒盟多伦县	内蒙古自治区多伦县		中国	小学	2019-02-14	2018-11-12	拘留 取保候审 逮捕	其他存在明确被害人的纠纷						孙德华				北京市青天律师事务所		0	0	0
00412_陈浩祾非法持有、私藏枪支、弹药一审刑事判决书		简易转普通			0	（2014）浦刑初字第3006号	1	陈浩祾																			2014-06-27		不存在明确被害人的纠纷						方亮	顾積伟			上海汇茂律师事务所	上海福一律师事务所	0	0	0
00413_刘凤韶非国家工作人员受贿、非法转让、倒卖土地使用权、受贿一审刑事判决书					0	（2014）中一法刑二初字第677号	1	刘凤韶	1970-10-30	完全刑事责任能力	1	45			汉族			其他		村民委员会主任	中山市	广东省中山市		中国	初中	2014-01-28	2014-10-09	拘留 逮捕							黄夏				广东金丰华律师事务所		0	0	0
00414_陈立祥、汤克前等开设赌场罪一审刑事判决书					0	（2014）蚌山刑初字第00244号	21	陈立祥	1970-11-20	完全刑事责任能力	1	44	1	1	汉族			无业		无业	蚌埠市蚌山区	安徽省蚌埠市	蚌埠市	中国		2014-01-29	2014-08-21	逮捕 拘留	不存在明确被害人的纠纷						沈宇				安徽淮河律师事务所		0	0	0				1
00415_陈某宗开设赌场一审刑事判决书					0	（2015）潮平法刑初字第159号	1	陈某宗	1958-07-22	完全刑事责任能力	1	57														2015-06-12	2015-09-11	拘留 逮捕	不存在明确被害人的纠纷												0	0	0				1
00417_江某某走私、贩卖、运输、制造毒品罪一审刑事判决书		简易			0	（2016）渝0107刑初1579号	1	江某某			1				汉族			务农		务农					高等专科学校	2016-11-11	2016-12-01	拘留 逮捕	不存在明确被害人的纠纷												0	0	0
00418_赵某某危险驾驶罪一审刑事判决书		简易			0	（2013）黄刑初字第582号	1	赵某某										无业		无业							2013-04-23	拘留	不存在明确被害人的纠纷												0	0	0				1
00420_周X骗一审刑事判决书					0	（2016）津0104刑初499号	1	周X	1982-12-29	完全刑事责任能力	1	34			汉族			其他		公司员工	天津市红桥区	天津市	天津市北辰区	中国	小学		2016-09-23	取保候审	其他存在明确被害人的纠纷						姚金锁				天津津凡诚律师事务所		0	0	0				1	1
00421_林某某开设赌场罪一审刑事判决书					0	（2017）辽0124刑初86号	21	林某某			1																2017-03-30		不存在明确被害人的纠纷						张某				辽宁某某律师事务所		0	0	0				1	1
00422_何绍干赌博一审刑事判决书					0	（2016）桂0125刑初64号	1	何绍干	1951-07-06	完全刑事责任能力	1	67			壮族			其他		个体户		广西壮族自治区上林县	广西壮族自治区上林县		初中	2015-12-16	2016-03-03	拘留 逮捕													0	0	0
00423_沈世罗、汪小华组织卖淫罪一审刑事判决书		简易			0	（2016）皖0522刑初169号	4	沈世罗	1972-04-16	完全刑事责任能力	1	44			汉族			其他		个体经营		浙江省瑞安市	浙江省瑞安市			2016-04-15	2016-08-09	逮捕 拘留	不存在明确被害人的纠纷						王鑫				安徽明博律师事务所		0	0	0				1
00424_边某犯盗窃罪一审刑事判决书		简易			0	（2015）杭江刑初字第752号	1	边某										无业		无业						2015-06-19	2015-08-10	逮捕 拘留	其他存在明确被害人的纠纷						杨继红		1		浙江良驹律师事务所		0	0	0				1
00425_苑振伟、孔腾飞等盗窃罪，苑振伟、孔腾飞等抢劫罪等一审刑事判决书					0	（2014）景刑初字第284号	6	苑振伟					0	1												2014-05-06	2014-11-03	逮捕 拘留	其他存在明确被害人的纠纷												0	0	0
00426_李学荣滥伐林木、赌博一审刑事判决书					0	（2018）粤0281刑初70号	1	李学荣	1978-06-10	完全刑事责任能力	1	40	1	1	汉族		0	其他		无固定职业	乐昌市		乐昌市	中国		2017-12-20	2018-04-27	逮捕 拘留	不存在明确被害人的纠纷						易芳		1		乐昌市法律援助处		0	0	0
00427_598丁一江危险驾驶罪一审刑事判决书		简易			0	（2019）苏0282刑初598号	1	丁一江	1973-07-10	完全刑事责任能力	1	46			汉族			其他		企业职工	宜兴市		宜兴市	中国		2019-06-13	2019-06-03	逮捕 拘留	不存在明确被害人的纠纷												0	0	0				1
00429_吴俊艺强奸一审刑事判决书		简易转普通			0	（2017）闽0582刑初2921号	1	吴俊艺	1989-08-01	完全刑事责任能力	1	29			汉族			务工		务工		福建省漳浦县	漳浦县		初中	2017-10-24	2018-10-24	逮捕 取保候审 拘留	其他存在明确被害人的纠纷						张军伟	苏汇通			福建君伟律师事务所	福建君伟律师事务所	0	0	0
00430_被告人赵庭军犯贪污罪一案的刑事判决书					0	（2013）江宁刑二初字第320号	1	赵庭军	1973-01-23	完全刑事责任能力	1	41			汉族			其他		街道农业服务中心主任		江苏省南京市			大学本科		2013-09-22	取保候审							周锦荣	陈静			江苏上元律师事务所	江苏上元律师事务所	0	0	0				1
00431_李镇国赌博罪一审刑事判决书		简易			0	（2019）闽0603刑初66号	1	李镇国	1980-09-10	完全刑事责任能力	1	39			汉族			其他		经商	福建省诏安县		福建省漳州市龙文区	中国	初中		2019-03-06	取保候审 监视居住 取保候审 拘留	不存在明确被害人的纠纷												0	0	0					1
00432_孙志斌强奸一审刑事判决书		简易			0	（2017）桂0203刑初505号	1	孙志斌	1988-03-27	完全刑事责任能力	1	29	1	1	汉族		0	其他		无固定职业	广西壮族自治区桂林市永福县	广西壮族自治区桂林市	广西壮族自治区柳州市鱼峰区	中国	中专（包括职业高中，中等专业学校，技工学校）	2017-07-13	2017-09-18	逮捕 拘留	其他存在明确被害人的纠纷						柯官宝				广西辩维律师事务所		0	0	0
00433_王春建、赵政故意伤害一审刑事判决书		简易			0	（2018）鲁1602刑初521号	2	王春建	1991-09-19	完全刑事责任能力	1	27			汉族			其他		个体经营	滨州市沾化区		滨州市经济技术开发区	中国	初中		2018-11-14	取保候审 拘留	其他存在明确被害人的纠纷												0	0	0
00435_汪军、李顺贪污罪一审刑事判决书		普通			0	（2019）皖1881刑初162号	2	汪军	1976-09-15	完全刑事责任能力	1	43			汉族			其他		派出所民警	宣城市宣州区		宣城市宣州区	中国	大学本科	2019-06-13	2019-07-05	逮捕 拘留	不存在明确被害人的纠纷						储有雷				安徽今昔律师事务所		1	0	0				1	1
00436_王某某开设赌场一审刑事判决书					0	（2015）蒙刑初字第00007号	5	王某某	1988-08-27	完全刑事责任能力	1	27			汉族			务农		务农					普通高级中学	2014-04-17	2014-12-16	逮捕 拘留	不存在明确被害人的纠纷						赵亮				北京策略律师事务所		0	0	0
00437_被告人刘光贵、邹龙清、刘文明、何吕犯开设赌场罪一审刑事判决书					0	（2016）湘1322刑初473号	4	刘光贵	1981-08-26	完全刑事责任能力	1	37			汉族			务农		务农		湖南省新化县	新化县		小学	2015/12/19#2018/3/5	2016-12-02	逮捕 取保候审 逮捕 拘留	不存在明确被害人的纠纷						陆序丰				湖南振瀚律师事务所		0	0	0
00438_陈祖明犯交通肇事罪一审刑事判决书		简易			0	（2015）园刑初字第0157号	1	陈祖明	1976-04-27	完全刑事责任能力	1	40	0	1								福建省莆田市				2016-04-06	2016-05-26	拘留 逮捕	其他存在明确被害人的纠纷						蒋存励	赵勇			江苏智择律师事务所	江苏智择律师事务所	0	0	0
00439_诉吴海勇组织他人偷越国(边)境罪一案一审刑事判决书					0	（2017）沪01刑初114号	1	吴海勇	1974-02-20	完全刑事责任能力	1	44			汉族						浙江省青田县	浙江省青田县		中国	大学本科	2017-04-07	2017-11-27	逮捕 拘留							杨德强				上海瀛泰律师事务所律师		0	0	0
00440_黄开伦贩卖毒品罪一审刑事判决书		简易			0	（2016）渝0103刑初1804号	1	黄开伦	1963-07-15	完全刑事责任能力	1	53	1	1	汉族		1	无业		无业		重庆市渝中区	重庆市江北区		普通高级中学	2016-11-28	2016-11-24	逮捕 监视居住	不存在明确被害人的纠纷												0	0	0
00441_郝晓明危险驾驶罪一审刑事判决书		简易			0	（2017）内0102刑初320号	1	郝晓明										其他		无固定职业	呼和浩特市	内蒙古自治区呼和浩特市		中国	中专（包括职业高中，中等专业学校，技工学校）		2017-09-07	取保候审	不存在明确被害人的纠纷												0	0	0
00442_刘某某危险驾驶罪一审刑事判决书		简易			0	（2015）锦江刑初字第126号	1	刘某某																			2015-01-19		不存在明确被害人的纠纷												0	0	0
00443_679刘某某危险驾驶罪一审刑事判决书		简易			0	（2018）苏1324刑初679号	1	刘某某	1967-11-26	完全刑事责任能力	1	51			汉族			其他		其他			山东省安丘市			2018-12-28	2018-12-20	取保候审 逮捕	不存在明确被害人的纠纷												0	0	0
00444_王强、林濠等人开设赌场一审刑事判决书		普通			0	（2018）川1302刑初175号	13	王强	1992-01-16	完全刑事责任能力	1	26			汉族								四川省南充市高坪区		初中	2018-04-25	2018-03-26	拘留 取保候审 逮捕	不存在明确被害人的纠纷												0	0	0				1
00445_程某某、徐某某赌博一审刑事判决书					0	（2018）鄂0204刑初202号	3	程某某																		2018-01-11		拘留 逮捕	不存在明确被害人的纠纷						徐默				湖北易圣律师事务所		0	0	0
00446_谢晓明等非法吸收公众存款罪一案刑事判决书					0	（2015）湘0302刑初461号	3	谢晓明	1968-08-26	完全刑事责任能力	1	50			汉族						湖南省湘潭市岳塘区			中国	大学本科	2015-05-22	2015-12-07	拘留 逮捕	其他存在明确被害人的纠纷						刘朝阳				湖南惟明律师事务所		0	0	0					1
00447_周某犯走私、贩卖、运输、制造毒品罪一审刑事判决书		简易			0	（2016）粤0303刑初2209号	1	周某																				拘留 逮捕	不存在明确被害人的纠纷												0	0	0
00448_被告人冯某甲盗窃案一审刑事判决书					0	（2015）正刑初字第28号	1	冯某甲	1988-01-18	完全刑事责任能力	1	27	1	1	汉族		0						河北省正定县		普通高级中学	2014-12-03	2015-01-15	拘留 逮捕	其他存在明确被害人的纠纷												0	0	0
00449_周伟国贩卖毒品一审刑事判决书		简易			0	（2018）沪0106刑初418号	1	周伟国	1960-02-18	完全刑事责任能力	1	58			汉族								上海市普陀区				2018-04-12		不存在明确被害人的纠纷												0	0	0
00450_周某拒不支付劳动报酬罪再审刑事判决书	1		0	0	0	（2019）晋0502刑再初1号	1	周某	1985-10-03	完全刑事责任能力	1	34			汉族						重庆市巫溪县			中国	小学				其他存在明确被害人的纠纷						郭某		1		晋城市城区法律援助中心		0	0	0	0	1
00451_张文仁行贿一审刑事判决书					0	（2017）皖0323刑初392号	1	张文仁	1974-08-16	完全刑事责任能力		44	0	0	汉族			其他		有限公司蚌埠地区经理	江苏省连云港市开发区		江苏省连云港市海州区	中国	高等专科学校	2016-02-06	2017-12-06	监视居住 拘留 逮捕 取保候审	不存在明确被害人的纠纷						刘传香				江苏天哲律师事务所		0	0	0
00452_刘进福、徐楠等开设赌场罪华小林开设赌场罪、诈骗罪一审刑事判决书		普通			0	（2017）苏0281刑初901号	7	刘进福	1969-09-14	完全刑事责任能力	1	48			汉族			其他		个体经营布料店	江阴市			中国	初中	2017-07-11	2017-05-04	取保候审 逮捕	不存在明确被害人的纠纷						于晴				江苏高广律师事务所		0	0	0
00453_冯蔚霞赌博罪一审刑事判决书		简易			0	（2019）闽0823刑初65号	1	冯蔚霞	1976-09-05		0	43			汉族			无业		无业	福建省上杭县		福建省上杭县	中国	初中		2019-01-24	取保候审	不存在明确被害人的纠纷												0	0	0				1		1
00454_被告人李先春犯滥用职权罪一审刑事判决书					0	（2016）湘0202刑初316号	1	李先春	1965-01-15		1	52															2016-12-13		不存在明确被害人的纠纷						李雨鹏				江苏正鹏律师事务所		0	0	0
00455_颜植毅、黄吉兴等非法经营罪、诈骗罪梁锦辉非法经营罪二审刑事判决书			1	1	0	（2017）浙01刑终599号	4	颜植毅	1975-03-16	完全刑事责任能力	1	42			汉族			无业		无业	安溪县			中国	高等专科学校	2016-05-26		逮捕 拘留	其他存在明确被害人的纠纷						黄扬冰	王洪辉			北京中银（福州）律师事务所	北京中银（福州）律师事务所	0	0	0
00456_陈某、柯某甲等寻衅滋事罪，陈亮故意伤害罪一审刑事判决书					0	（2014）铜刑初字第00020号	3	陈某甲	1983-09-11	完全刑事责任能力	1	31			汉族			无业		无业	铜陵县	铜陵县	铜陵县	中国		2012/12/26#2013/12/30	2014-01-16	拘留 取保候审 拘留 逮捕 取保候审 逮捕	其他存在明确被害人的纠纷						史万全				安徽智全律师事务所		0	0	0
00457_李政猥亵儿童一审刑事判决书		简易			0	（2019）沪0105刑初283号	1	李政	1984-08-31	完全刑事责任能力	1	45	1	1	汉族		0				上海市黄浦区		上海市普陀区	中国											李云		1		上海友禾律师事务所		0	0	0				1		1
00458_李某1、李寿保赌博一审刑事判决书					0	（2017）粤1581刑初146号	10	李某1	1966-08-29	完全刑事责任能力	1	51			汉族								广东省陆丰市		初中	2017-01-13	2017-04-19	逮捕 拘留	不存在明确被害人的纠纷						黄进亮				广东沁森律师事务所		0	0	0				1
00459_王义新非法狩猎罪一审刑事判决书					0	（2018）鄂0981刑初183号	1	王义新	1965-11-27	完全刑事责任能力	1	53			汉族			务农		务农			应城市		初中		2018-08-15	取保候审	不存在明确被害人的纠纷												0	0	0
00460_蔡某危险驾驶罪，蔡某妨害作证罪一审刑事判决书					0	（2014）绍诸刑初字第20号	1	蔡某																			2013-12-24	取保候审	不存在明确被害人的纠纷												0	0	0
00461_于某、赵某、刘某等开设赌场一审刑事判决书					0	（2017）吉0183刑初45号	4	于某			1				汉族			无业		无业	长春市双阳区		长春市双阳区	中国	初中	2016-12-08	2017-01-17	拘留 逮捕	不存在明确被害人的纠纷						张某				吉林华信律师事务所		0	0	0				1
00462_冯贵葛、冯小路等开设赌场罪二审刑事判决书			1	0	0	（2017）鄂09刑终292号	12	侯帅豪	1986-03-13	完全刑事责任能力	1	31			汉族			无业		无业	河南省平顶山市郏县	河南省平顶山市郏县	河南省许昌市襄城县	中国	普通高级中学	2016-09-30		逮捕 拘留	不存在明确被害人的纠纷												0	0	0	0	1	0	1	1
00463_何某某合同诈骗一审刑事判决书					0	（2017）沪0117刑初1993号	1	何某某	1962-12-19	完全刑事责任能力	1	56			汉族						上海市徐汇区			中国			2017-11-29								陈德子		1		上海凯中律师事务所		0	0	0
00464_刘某开设赌场一审刑事判决书					0	（2017）粤1781刑初166号	1	刘某			1		1	1	汉族		0	务农		务农	广东省阳春市	广东省阳春市	广东省阳春市	中国	初中	2017-07-05	2017-06-27	逮捕 取保候审	不存在明确被害人的纠纷												0	0	0
00465_王某甲寻衅滋事一审刑事判决书					0	（2015）青法刑初字第28号	1	王某甲	1980-04-26	完全刑事责任能力	1	35			汉族			其他		无固定职业			黑龙江省青冈县		初中	2014-06-27	2015-01-30	逮捕 拘留													0	0	0				1
00466_长垣县人民法院 刑事判决书 （2014）长刑初字第170号			1	0	0	（2014）长刑初字第170号	1	檀某某	1979-08-22	完全刑事责任能力	1	35			汉族			务农		务农					小学	2013-08-02	2014-01-16	拘留 逮捕	不存在明确被害人的纠纷						王清芳				河南瑞源律师事务所		0	0	0	0	1	0
00467_钟万光钟爵儒徐运林非国家工作人员受贿罪一审刑事判决书		普通			0	（2016）粤0306刑初7895号	3	钟万光	1969-07-10	完全刑事责任能力	1	58			汉族			其他		股份合作公司副董事长			深圳市宝安区		初中	2016-07-07		拘留 逮捕	不存在明确被害人的纠纷						杜舒寒	王双飞			广东中熙律师事务所	广东中熙律师事务所	0	0	0
00468_刘齐平赌博罪一审刑事判决书			1	0	0	（2018）鄂1083刑初77号	1	刘齐平	1991-05-31	完全刑事责任能力	1	28			汉族			无业		无业			洪湖市		初中	2017-06-02	2017-10-27	拘留 逮捕	不存在明确被害人的纠纷						王际伟				湖北园林律师事务所		0	0	0
00469_何喊生犯合同诈骗罪一审刑事判决书					0	（2014）井刑初字第00147号	1	何喊生	1960-05-28	完全刑事责任能力		54														2014-06-06	2014-12-08	拘留 逮捕	其他存在明确被害人的纠纷						刘博				河北冀华律师事务所		0	0	0
00470_陆某、梁某某容留他人吸毒一审刑事判决书		简易			0	（2018）粤1226刑初47号	2	陆某	1982-02-10	完全刑事责任能力	1	36			汉族						广东省德庆县			中国	初中	2018-03-05		拘留 逮捕	不存在明确被害人的纠纷						瞿洪群		1		广东创致律师事务所		0	0	0
00471_阿卜杜某甲、厉秀村等开设赌场罪一审刑事判决书					0	（2014）温永刑初字第683号	9	阿卜杜某甲																		2014-02-20	2014-06-11	逮捕 拘留	不存在明确被害人的纠纷						周耀斌		1		浙江中辛律师事务所		0	0	0
00472_王军国犯抢劫罪、盗窃罪等何再强、胡其彬等犯抢劫罪、寻衅滋事罪狄大超、郭肖等犯抢劫罪向绍慧犯盗窃罪再审刑事判决书			0	1	0	（2014）嘉桐刑抗再字第1号	9	向绍慧					0					无业		无业						2013-10-25		取保候审 逮捕 拘留	其他存在明确被害人的纠纷						范云海				浙江国毅律师事务所		0	0	0		1	0
00473_袁秀飞强奸罪一审刑事判决书		简易			0	（2017）浙0206刑初836号	1	袁秀飞	1999-03-31	完全刑事责任能力	1	18			汉族			务工		务工						2017-09-25	2017-12-11	拘留 逮捕	其他存在明确被害人的纠纷												0	0	0
00474_李某甲、李某已开设赌场二审刑事判决书			1		0	（2017）赣03刑终112号	3	李某甲	1987-06-12	完全刑事责任能力	1	30			汉族			无业		无业	江西省			中国	初中	2016-12-28		拘留 逮捕 取保候审	不存在明确被害人的纠纷												0	0	0		1
00475_王某污染环境一审刑事判决书		简易			0	（2018）鲁1121刑初172号	1	王某	1987-06-06	完全刑事责任能力	1	31			汉族			务农		务农	山东省临沂市河东区	山东省临沂市河东区		中国	初中		2018-07-27	拘留 取保候审	不存在明确被害人的纠纷						王西刚	郑苹	1	1	山东阳尔律师事务所	山东阳尔律师事务所	0	0	0				1
00476_万书红挪用资金一审刑事判决书					0	（2018）粤2072刑初986号	1	万书红	1974-01-01	完全刑事责任能力	1	44			汉族			其他		有限公司区域经理	南昌市进贤县			中国	初中	2017-09-09	2018-05-17	逮捕 拘留	其他存在明确被害人的纠纷						汤剑华				广东科业律师事务所		0	0	0				1
00477_黄某某开设赌场一审刑事判决书					0	（2018）赣0921刑初57号	1	黄某某	1989-07-04	完全刑事责任能力	1	29	1	1	汉族		0	无业		无业			奉新县		初中	2017-11-03	2018-04-12	拘留 取保候审 拘留 逮捕							金小喜	冷新明			江西康拓律师事务所	江西康拓律师事务所	0	0	0
00478_蔡建兴开设赌场一审刑事判决书		普通			0	（2018）闽0583刑初1024号	1	蔡建兴	1968-05-07	完全刑事责任能力	1	50			汉族			务工		务工		福建省晋江市	晋江市		小学	2018-04-11	2018-07-23	拘留 逮捕	不存在明确被害人的纠纷						卢文默	卢萍萍			福建文默律师事务所	福建文默律师事务所	0	0	0
00480_神州伟智（天津）科技有限公司、韩军侵犯公民个人信息一审刑事判决书		简易			0	（2019）鲁0321刑初41号	3	神州伟智（天津）科技有限公司																			2019-01-23		不存在明确被害人的纠纷												0	0	0
00481_白云龙走私、贩卖、运输、制造毒品罪一审刑事判决书		简易			0	（2017）辽0105刑初356号	1	白云龙	1988-04-28	完全刑事责任能力	1	29			汉族			无业		无业			沈阳市和平区		中专（包括职业高中，中等专业学校，技工学校）	2017-07-12	2017-07-07	逮捕 取保候审	不存在明确被害人的纠纷												0	0	0
00482_李某走私、贩卖、运输、制造毒品一审刑事判决书		简易			0	（2016）鄂0116刑初643号	1	李某																		2016-09-20	2016-11-17	逮捕 拘留	不存在明确被害人的纠纷												0	0	0
00483_常振雷、薛红涛开设赌场一审刑事判决书					0	（2017）豫1326刑初4号	4	常振雷	1985-06-19	完全刑事责任能力	1	32			汉族			无业		无业			河南省汝阳县		初中	2016-09-21		逮捕 拘留	不存在明确被害人的纠纷												0	0	0
00484_张某甲、张某乙开设赌场一案一审刑事判决书					0	（2016）黑0903刑初85号	2	张某甲	1984-03-13	完全刑事责任能力	1	32			汉族			无业		无业	四川省广安市			中国	初中		2016-06-06	拘留 逮捕 取保候审 逮捕	不存在明确被害人的纠纷												0	0	0
00485_董宝海走私、贩卖、运输、制造毒品罪一审刑事判决书		简易			0	（2016）鲁0105刑初478号	1	董宝海			1		1	1			0						济南市历城区			2016-07-26	2016-11-09	逮捕 拘留	不存在明确被害人的纠纷												0	0	0
00486_陈某2、陈某3开设赌场一审刑事判决书					0	（2019）粤1223刑初43号	6	陈某2	1984-10-13	完全刑事责任能力	1	35			汉族								广东省		初中	2018-11-25	2019-03-22	拘留 逮捕	不存在明确被害人的纠纷						胡海丽		1		广东鼎都律师事务所		0	0	0
00487_被告人赖俊超引诱幼女卖淫一案一审刑事判决书					0	（2014）汀刑初字第27号	1	赖俊超	1991-04-24	完全刑事责任能力	1	23			汉族							福建省长汀县	福建省长汀县			2013-06-14	2014-01-21	拘留 逮捕	其他存在明确被害人的纠纷						辩护人				福建融成律师事务所		0	0	0				0
00488_黄子杰重婚一审刑事判决书		普通			0	（2015）清阳法刑初字第194号	1	黄子杰			1				汉族								广东省广州市海珠区				2015-12-18		不存在明确被害人的纠纷						邓超军				广东义法律师事务所		0	0	0
00489_周海华、伍卫红开设赌场一审刑事判决书					0	（2016）粤1882刑初37号	18	周海华			1		0	0	汉族								连州市		普通高级中学	2015-12-25	2016-04-08	逮捕 拘留	不存在明确被害人的纠纷												0	0	0				1
00490_李五阳职务侵占罪一审刑事判决书		简易			0	（2019）闽0582刑初110号	1	李五阳	1964-07-17	完全刑事责任能力	1	55			汉族			其他		有限公司管理人员			晋江市		初中	2018-05-17	2019-01-03	拘留 逮捕	不存在明确被害人的纠纷												0	0	0
00492_马某祥故意伤害罪一审刑事判决书		普通			0	（2018）苏0891刑初126号	1	马某祥	1987-10-09	减轻刑事责任能力	1	31			彝族			无业		无业		云南省金平苗族瑶族傣族自治县	云南省红河哈尼族彝族自治州金平苗族瑶族傣族自治县		小学	2018-07-16	2018-06-25	拘留 取保候审 逮捕	其他存在明确被害人的纠纷						田若尘				江苏腾泽律师事务所		0	0	0
00493_王洪光受贿一审刑事判决书					0	（2017）京0101刑初248号	1	王洪光	1962-11-12	完全刑事责任能力	1	55						其他		最高人民法院民一庭审判长（正处级）	北京市海淀区	山东省诸城市	北京市海淀区	中国	硕士研究生	2016-07-29	2017-03-30	拘留 逮捕	不存在明确被害人的纠纷						张国文				北京市中同律师事务所		0	0	0					1
00494_刘适才盗窃案一审刑事判决书		简易			0	（2014）桐刑初字第00149号	1	刘适才	1958-09-22	完全刑事责任能力	1	56														2014-05-16	2014-06-17	拘留 逮捕	其他存在明确被害人的纠纷												0	0	0				1	1
00495_方向红组织领导传销活动一审刑事判决书					0	（2017）湘0304刑初19号	1	方向红	1971-05-18	完全刑事责任能力	0	46			汉族			无业		无业	湘潭县		湘潭市岳塘区	中国		2016-08-26	2017-01-20	拘留 逮捕	不存在明确被害人的纠纷						杨希				湖南潭州律师事务所		0	0	0
00496_米某某非法持有毒品一审刑事判决书		简易			0	（2018）沪0106刑初1061号	1	米某某	1980-05-15	完全刑事责任能力	1	38	1	1	维吾尔族		0				新疆维吾尔自治区乌鲁木齐市			中国			2018-09-11		不存在明确被害人的纠纷												0	0	0
00497_王春林、王加青开设赌场一审刑事判决书					0	2018）皖0225刑初129号	4	王春林	1986-01-19	完全刑事责任能力	1	32		1	汉族			无业		无业		安徽省无为县	安徽省无为县		初中	2017-09-07	2018-04-11	拘留 逮捕	不存在明确被害人的纠纷						武道平				安徽有为律师事务所		0	0	0				1
00498_陈某1抢夺、妨害公务一审刑事判决书					0	（2018）粤09刑初65号	1	陈某1	1976-01-17	完全刑事责任能力	1	43	1	1	汉族						广东省高州市			中国	文盲	2018-02-14	2018-10-25	拘留 逮捕	其他存在明确被害人的纠纷						吴燕平		1		茂名市公职律师事务所		0	0	1				1
00499_陈太然敲诈勒索一审刑事判决书					0	（2016）浙0481刑初3号	1	陈太然	1984-07-10	完全刑事责任能力	1	32			汉族			务农		务农	江苏省宿迁市		江苏省宿迁市宿城区	中国	初中	2015-08-31	2016-01-05	拘留 逮捕	其他存在明确被害人的纠纷						徐新建				浙江潮乡律师事务所		0	0	0
00500_任永忠危险驾驶罪一审刑事判决书					0	（2018）内0105刑初491号	1	任永忠	1961-04-24	完全刑事责任能力	1	58			蒙古族			其他		内蒙古自治区认证中心工作人员			呼和浩特市		高等专科学校			取保候审	其他存在明确被害人的纠纷												0	0	0				1
00501_刘贞坚犯受贿罪一审刑事判决书					0	（2014）潍刑二初字第19号	1	刘贞坚										其他		原系中共菏泽市委常委、统战部部长						2013-12-18	2014-11-12	拘留 逮捕	不存在明确被害人的纠纷						李金元	宋卫国			山东求是和信律师事务所	山东舜翔律师事务所	0	0	0				1	1
00502_陈玉生职务侵占一审刑事判决书					0	（2018）赣0730刑初190号	1	陈玉生	1965-01-02	完全刑事责任能力	1	53			汉族			其他		宁都县长胜镇黄岗村原村委会主任	江西省赣州市宁都县		宁都县	中国	普通高级中学	2018-02-28	2018-06-28	拘留 逮捕	其他存在明确被害人的纠纷						邓三保				江西翠微律师事务所		0	0	0
00503_周潮兴行贿一审刑事判决书					0	（2018）粤20刑初47号	1	周潮兴	1971-01-10	完全刑事责任能力	1	47			汉族			其他		中山市实毅建筑工程有限公司法定代表人	广东省中山市			中国	初中	2017-09-28	2018-04-09	拘留 监视居住 逮捕	不存在明确被害人的纠纷						张强	杨升松			广东铭致律师事务所	广东铭致律师事务所	0	0	0
00504_容康社滥用职权、受贿一审刑事判决书					0	刑事判决书 （2017）桂09刑初27号	1	容康社	1959-11-10	完全刑事责任能力	1	58			壮族			其他		案发前任南宁市政协党组副书记（副厅级）		广西壮族自治区宁明县	南宁市		硕士研究生	2016-11-25	2017-04-30	拘留 逮捕						1	彭荣汉	潘祖贵			广西桂三力律师事务所	广西创想律师事务所	0	0	0				1	1
00505_被告人陈建飞强奸罪一审刑事判决书					0	（2016）闽0881刑再1号	4	陈建飞	1991-10-01	完全刑事责任能力	1	25	0		汉族			无业		无业		漳平市	漳平市		初中	2010-11-12		拘留 逮捕	其他存在明确被害人的纠纷												0	0	0				1
00506_被告人徐庆与田元刚聚众斗殴罪一审刑事判决书		简易			0	（2017）苏0104刑初1179号	2	田元刚	1986-05-26	完全刑事责任能力	1	32			汉族			无业		无业	江苏省邳州市	江苏省邳州市	南京市	中国	初中	2017-04-22	2017-12-29	拘留 逮捕	其他存在明确被害人的纠纷						夏如斌				江苏维世德律师事务所		0	0	0
00507_郭皓凌走私毒品罪一审刑事判决书					0	（2015）榕刑初字第33号	1	郭皓凌	1990-10-23	完全刑事责任能力	1	25			汉族			无业		无业	福建省福清市	福建省福清市	福建省福清市	中国	中专（包括职业高中，中等专业学校，技工学校）	2014-10-23	2015-01-23	拘留 逮捕	不存在明确被害人的纠纷						魏太清	鲍夏莹			北京大成（福州）律师事务所	北京大成（福州）律师事务所	0	0	0
00508_程海松强奸罪一审刑事判决书		普通			0	（2015）杭萧刑初字第33号	1	程海松	1976-10-12	完全刑事责任能力	0	39			汉族			务农		务农	阳新县	湖北省阳新县		中国	小学	2014-09-12	2014-12-23	拘留 逮捕	其他存在明确被害人的纠纷						周国刚		1		杭州市萧山区法律援助中心		0	0	0				1
00509_王家平强奸一审刑事判决书		简易			0	（2017）云0324刑初203号	1	王家平	1981-09-11	完全刑事责任能力	1	36			彝族			务农		务农		云南省罗平县	罗平县		文盲	2017-03-17	2017-06-09	拘留 逮捕													0	0	0				1
00510_王风山受贿、行贿二审刑事判决书			1		0	（2018）冀05刑终100号	1	王风山	1962-05-08	完全刑事责任能力	1	56			汉族			其他		2010年至2017年3月任邢台县城乡建设局公产房产管理处副处长兼任邢台县通达房地产开发公司法人代表		河北省邢台县	邢台市桥东区		普通高级中学	2017-04-21		监视居住 拘留 逮捕	不存在明确被害人的纠纷						陈益民				河北盛德律师事务所		0	0	0
00511_摄东升、赵正刚侵犯著作权一审刑事判决书		普通			0	（2017）鄂1123刑初2号	7	摄东升	1979-04-15	完全刑事责任能力	1	38			汉族			务工		务工	山西省宁武县		广东省深圳市宝安区	中国	中专（包括职业高中，中等专业学校，技工学校）	2015-11-20	2016-12-09	拘留 逮捕 取保候审	不存在明确被害人的纠纷						方锋				湖北神宇律师事务所		0	0	0
00512_陈洪山强奸一审刑事判决书					0	（2016）吉0183刑初66号	1	陈洪山														吉林省德惠市	吉林省德惠市			2015-11-03	2016-01-04														0	0	0
00513_被告人王某某滥伐林木案一审刑事判决书		简易			0	（2014）贵刑初字第00261号	1	王某某	1961-10-10	完全刑事责任能力	1	53			汉族			务农		务农	池州市贵池区		池州市贵池区	中国	初中		2014-08-20	取保候审	不存在明确被害人的纠纷												0	0	0
00514_杨明辉受贿一审刑事判决书					0	（2018）云3122刑初84号	1	杨明辉	1977-02-13	完全刑事责任能力	1	41			汉族			其他		原梁河县公安局副局长		云南省梁河县	云南省梁河县		大学本科	2018-06-11	2018-07-27	逮捕	不存在明确被害人的纠纷						段亚元，				云南立建律师事务所		1	0	0				1	1
00515_曾某某受贿一审刑事判决书					0	（2019）赣0702刑初466号	1	曾某某	1971-04-13	完全刑事责任能力	1	48									江西省赣州市章贡区	江西省赣州市章贡区		中国		2019-07-10	2019-08-02	拘留 逮捕	不存在明确被害人的纠纷						廖美兴	曾钦艳			江西创兴律师事务所	江西创兴律师事务所	1	0	0
00517_梁正军受贿一审刑事判决书					0	（2018）云03刑初91号	1	梁正军	1962-02-17	完全刑事责任能力	1	56			汉族			其他		其他	云南省大理白族自治州大理市		云南省昆明市西山区	中国	硕士研究生	2018-04-28	2018-07-30	逮捕	不存在明确被害人的纠纷						韩友谊	顾光晗			北京大成律师事务所	北京大成（昆明）律师事务所	1	0	0					1
00518_赵君伟开设赌场罪速裁程序刑事判决书		速裁			0	（2017）京0118刑初8号	1	赵君伟	1987-06-28	完全刑事责任能力	1	30	1	1												2016-11-18		监视居住 取保候审 拘留 逮捕	不存在明确被害人的纠纷												0	0	0
00519_杭州世纪联线网络技术有限公司、上海翱宏网络科技有限公司等侵犯著作权罪一审刑事判决书					0	（2011）杭滨刑初字第145号	4	杭州世纪联线网络技术有限公司																			2011-09-01		不存在明确被害人的纠纷												0	0	0
00520_叶福明危险驾驶罪一审刑事判决书		简易			0	（2019）闽0625刑初47号	1	叶福明	1988-10-11	完全刑事责任能力	1	31			汉族			务工		务工	福建省长泰县		福建省长泰县	中国	初中		2019-02-13	取保候审	不存在明确被害人的纠纷												0	0	0				1	1
00521_许招盈徇私枉法、行贿一审刑事判决书					0	（2018）粤0811刑初134号	1	许招盈	1972-01-29	完全刑事责任能力	1	46			汉族			其他		其他			湛江市		大学本科	2018-05-14	2018-08-02	逮捕	不存在明确被害人的纠纷						钟佩娟	陈经纲			广东省海东律师事务所	广东省海东律师事务所律师	1	0	0					1
00522_胡梓实受贿、行贿一审刑事判决书					0	（2016）粤19刑初117号	1	胡梓实	1957-01-12	完全刑事责任能力	1	60			汉族			其他		原广州广日集团有限公司副总经理兼投资发展部部长			广东省广州市天河区		大学本科	2015-02-15	2016-04-14	拘留 逮捕	不存在明确被害人的纠纷						赵立柱	杨峰			广东莞信律师事务所	广东莞信律师事务所	0	0	0
00523_被告人罗某某贩卖毒品罪一审刑事判决书		简易			0	（2016）湘0105刑初622号	1	罗某某	1965-05-13	完全刑事责任能力	0	51			汉族			无业		无业	重庆市沙坪坝区	重庆市		中国	初中	2016-09-01	2016-12-02	拘留 逮捕	不存在明确被害人的纠纷												0	0	0
00524_康某某故意伤害一审刑事判决书					0	（2018）晋1123刑初25号	1	康某某	1981-08-12	完全刑事责任能力	1	37			汉族						山西省吕梁市兴县			中国	初中	2017-10-26		拘留 逮捕	其他存在明确被害人的纠纷						白峰晓				山西三晋（晋中）律师事务所		0	0	0				1
00525_何宗志受贿罪一审刑事判决书					0	（2017）川09刑初41号	1	何宗志	1955-11-11	完全刑事责任能力	1	63			汉族			其他		原四川省公安厅交通警察总队党委书记、总队长（四川省公安厅交通管理局党委书记、局长）		四川省南江县	四川省成都市锦江区		大学本科	2017-04-10	2017-12-14	拘留 逮捕	不存在明确被害人的纠纷						何长升	韩昌			四川润方律师事务所	四川润方律师事务所	0	0	0				1
00526_王扎如色走私、贩卖、运输、制造毒品罪一审刑事判决书					0	（2018）陕01刑初189号	1	王扎如色	1975-05-23	完全刑事责任能力	1	43			彝族			务农		务农					文盲	2017-07-26	2018-08-29	拘留 逮捕	不存在明确被害人的纠纷						笪祖明	王扎某某			陕西智晖律师事务所		0	0	0
00527_被告人李某、曹某受贿罪一审刑事判决书					0	（2016）湘1028刑初68号	2	李某			1				汉族			其他		党委书记、局长、督察长，副处级	湖南省桂阳县			中国	大学本科	2015-09-30	2016-08-10	逮捕 拘留	不存在明确被害人的纠纷						唐升家	邓召飞			湖南民浩律师事务所	湖南民浩律师事务所	0	0	0
00528_李晓斌强奸一审刑事判决书					0	（2018）云0829刑初12号	1	李晓斌	1987-08-25	完全刑事责任能力	1	31			哈尼族			务工		务工	云南省墨江哈尼族自治县			中国	高等专科学校	2017-09-29	2018-02-01	拘留 逮捕	其他存在明确被害人的纠纷						吴宏波				云南五木律师事务所		0	0	0				1
00529_龚国平涉受贿罪一案刑事判决书					0	（2014）钦刑二初字第5号	1	龚国平																					不存在明确被害人的纠纷						张向民	黄永金			广西政大律师事务所	广西政大律师事务所	0	0	0					1
00530_赵旭等故意伤害案一审刑事判决书			1		0	（2010）洛刑一初字第17号	6	赵旭	1985-04-16	完全刑事责任能力	1	25																	其他存在明确被害人的纠纷						姚晖	赵报			河南金晖律师事务所律师。		0	0	0	1
00531_包某、杨某滥用职权、单位行贿、受贿、贪污一审刑事判决书		普通			0	（2016）桂0722刑初13号	2	包某	1960-09-12	完全刑事责任能力	0	56			蒙古族			其他		原系钦州市公共汽车公司经理、法定代表人（1997年6月9日至2014年12月30日），国企干部	吉林省	吉林省	广西壮族自治区钦州市钦南区	中国	中专（包括职业高中，中等专业学校，技工学校）	2015-05-15	2016-01-11	监视居住 逮捕	不存在明确被害人的纠纷						唐云				广西海湾律师事务所		0	0	0
00532_黄志伟受贿一审刑事判决书					0	（2015）黔毕中刑初字第206号	1	黄志伟	1963-11-16	完全刑事责任能力	1	53			汉族			其他		其他	贵州省贵阳市云岩区		贵阳市	中国	硕士研究生	2015-08-03	2015-11-20	拘留 逮捕	不存在明确被害人的纠纷						李红英				贵州衡一律师事务所律师		0	0	0				1	1
00533_蒋超、曾涛、黄X、蒋瑶、郭云祥犯盗窃罪刑事判决书					0	（2011）芦法刑初字第8号	5	蒋超	1989-09-11	完全刑事责任能力	1	22			汉族			无业		无业		湖南省			初中	2010-11-16	2010-12-23	逮捕	其他存在明确被害人的纠纷												0	0	0
00534_龚延林、余四平受贿、行贿一审刑事判决书					0	（2018）湘0681刑初339号	3	龚延林	1963-03-02	完全刑事责任能力	1	56			汉族			其他		原任岳阳市国土资源局岳阳楼区分局副主任科员		湖南省岳阳县	岳阳市岳阳楼区		高等专科学校	2018-05-03	2018-12-05	监视居住 逮捕	不存在明确被害人的纠纷						龚畅华				湖南忠民律师事务所		0	0	0
00535_任明皓利用影响力受贿、受贿、行贿一审刑事判决书					0	（2015）郊刑初字第113号	1	任明皓	1956-09-12	完全刑事责任能力	1	60			汉族			其他		中国储备粮黑龙江收储经销有限公司董事长		黑龙江省哈尔滨市	黑龙江省哈尔滨市南岗区		大学本科	2015-02-09		拘留 监视居住 拘留 逮捕	不存在明确被害人的纠纷						孙炜	冷德武			北京大成（哈尔滨）律师事务所	北京大成（哈尔滨）律师事务所	0	0	0
00536_陈建周受贿、非国家工作人员受贿一审刑事判决书					0	（2018）粤1972刑初2404号	1	陈建周	1966-01-17	完全刑事责任能力	1	53			汉族			其他		原系东莞市虎门镇南面社区党工委书记	广东省东莞市		东莞市	中国	高等专科学校	2018-09-28	2018-10-18	逮捕							唐凌攀	邓进威			广东迎君律师事务所	广东迎君律师事务所	1	0	0					0
00537_张伯平走私、贩卖、运输、制造毒品罪一审刑事判决书					0	（2016）粤0306刑初2679号	1	张某	1978-09-25	完全刑事责任能力	1	38			汉族						广东省茂名市		茂名市化州市	中国	小学	2016-02-26		拘留 逮捕	不存在明确被害人的纠纷						林海秋				广东宝源律师事务所		0	0	0
00538_蒋某某组织、领导、参加黑社会性质组织一审刑事判决书					0	（2017）豫1423刑初306号	1	蒋某某	1976-12-12	完全刑事责任能力	1	41			汉族			务农		务农			河南省永城市		初中	2017-02-09		逮捕	不存在明确被害人的纠纷												0	0	0				1	1
00539_于红玉故意伤害一审刑事判决书					0	（2017）冀0681刑初79号	1	于红玉	1981-07-07	完全刑事责任能力	1	36			汉族						河北省沧州市任丘市		河北省涿州市	中国	大学本科	2016-08-29	2017-03-22	拘留 逮捕 取保候审	其他存在明确被害人的纠纷						田劼	冯红			北京葆涵律师事务所	北京葆涵律师事务所	0	0	0
00540_廖某生、梁某波非国家工作人员受贿一审刑事判决书					0	（2017）桂0722刑初198号	4	廖某生	1989-01-13	完全刑事责任能力	1	28			壮族			其他		京东商城-家电事业部-京东家电专卖店广西地区原经理岗	广西壮族自治区上思县	广西壮族自治区上思县	广西壮族自治区南宁市江南区	中国	普通高级中学	2017-03-29	2017-08-23	拘留 逮捕	其他存在明确被害人的纠纷						朱恩平	黄淑宾			广西精一律师事务所	广西精一律师事务所	0	0	0
00541_农振合、韦小花等人盗窃案一审刑事判决书		普通			0	（2014）北刑初字第309号	5	农振合			1															2014-04-12	2014-10-28	拘留 逮捕	其他存在明确被害人的纠纷												0	0	0				0	0
00542_吴金宁受贿罪一审刑事判决书					0	（2017）粤53刑初27号	1	吴金宁	1963-03-29	完全刑事责任能力	1	55			汉族			其他		捕前任广东省佛山市司法局局长	佛山市禅城区		佛山市禅城区	中国	高等专科学校	2016-07-27	2017-06-01	拘留 逮捕	不存在明确被害人的纠纷						严伟良	陈育炽			广东翔浩律师事务所	广东法制盛邦律师事务所	0	0	0				1	1
00544_岩依罗走私、贩卖、运输、制造毒品刑事判决书					0	（2017）云刑核35586145号	1	岩依罗	1984-03-20	完全刑事责任能力	1	33			傣族			务农		务农	云南省勐海县		勐海县	中国	文盲	2016-05-28		拘留 取保候审 拘留 逮捕	不存在明确被害人的纠纷						字美军		1		云南典卫律师事务所		0	0	0
00545_赵某辉受贿二审刑事判决书			1		0	（2017）粤09刑终219号	1	赵某辉	1980-10-11	完全刑事责任能力	1	38			汉族			其他		在茂名市电白区城市综某管理局工作（2014年9月担任党组成某、副局长）期间		广东省茂名市电白区			大学本科				不存在明确被害人的纠纷						杨小红	罗丹梅			广东海法律师事务所	广东海法律师事务所	0	0	0				1	1
00546_刘振锋行贿罪一审刑事判决书					0	（2019）桂1002刑初68号	1	刘振锋	1972-05-18	完全刑事责任能力	1	47			汉族			其他		个体	广西壮族自治区南宁市	广西壮族自治区玉林市	广西壮族自治区南宁市青秀区	中国	高等专科学校	2019-01-04	2019-02-21	拘留 逮捕	不存在明确被害人的纠纷						谢冬梅				广西阳泰律师事务所		1	0	0				1
00547_段永利、黄敬忠、何佳章等贪污罪一审刑事判决书					0	（2016）闽06刑初12号	4	段永利	1963-11-18	完全刑事责任能力	1	55			汉族			其他		原任福建七建集团有限公司董事长、法定代表人		河南省淇县	福建省漳州市芗城区		大学本科	2015-05-15	2016-04-06	拘留 逮捕	不存在明确被害人的纠纷						周红	柯松江			福建南州律师事务所	国浩律师（福州）事务所	0	0	0
00548_周某甲犯赌博罪一审刑事判决书		简易			0	（2016）苏0509刑初495号	1	周某甲										其他		经商							2016-03-30	取保候审	不存在明确被害人的纠纷												0	0	0
00549_薛超、刘某贩卖毒品罪一审刑事判决书		简易			0	（2014）李刑初字第81号	2	薛超			0				汉族			其他		系青岛市李沧区书院路薇薇新娘员工	青岛市市北区	山东省青岛市		中国	普通高级中学	2013-06-20	2014-01-02	拘留 逮捕	不存在明确被害人的纠纷						王恩民				山东琴岛律师事务所		0	0	0				1
00550_陆钦华受贿、滥用职权一审刑事判决书					0	（2015）防市刑二初字第30号	1	陆钦华			1															2014-09-05	2015-05-20	拘留 逮捕	不存在明确被害人的纠纷						唐云				广西海湾律师事务所		0	0	0				1
00551_孙某某强奸罪一审刑事判决书					0	（2018）内0525刑初359号	1	孙亚彬	1983-07-12	完全刑事责任能力	1	35			汉族			务农		务农	内蒙古自治区通辽市奈曼旗		奈曼旗	中国	初中	2018-08-08	2018-11-14	拘留 逮捕	其他存在明确被害人的纠纷						张伟				内蒙古义源律师事务所		0	0	0
00552_陈望清一审刑事判决书		速裁			0	（2019）鄂0117刑初82号	1	陈望清	1971-07-21	完全刑事责任能力	1	48			汉族			无业		无业		武汉市新洲区	武汉市新洲区		初中			拘留 取保候审	不存在明确被害人的纠纷												0	0	0				1		1
00553_程远新、于永明贪污、受贿一审刑事判决书					0	（2017）黑1282刑初240号	3	程远新	1963-06-03	完全刑事责任能力	1	55			汉族			其他		原肇东市供销合作联合社主任、党委书记			黑龙江省肇东市		高等专科学校	2017-04-28	2017-09-18	拘留 逮捕	不存在明确被害人的纠纷						项世和				黑龙江华宇律师事务所		0	0	0					1
00554_王某某危险驾驶案一审刑事判决书		简易			0	（2015）清刑初字第00032号	1	王某某	1977-12-03	完全刑事责任能力	1	38			汉族			无业		无业		内蒙古自治区清水河县	内蒙古自治区呼和浩特市玉泉区		文盲		2015-06-03	取保候审	其他存在明确被害人的纠纷												0	0	0				1	1
00555_朱某、刀某走私、贩卖、运输、制造毒品罪一审刑事判决书					0	（2018）粤0306刑初714号	2	朱某			1				哈尼族						云南省红河哈尼族彝族自治州		红河哈尼族彝族自治州元阳县	中国	小学	2017-09-29	2018-01-16	拘留 逮捕	不存在明确被害人的纠纷												0	0	0				1	1
00556_陈某某危险驾驶一审刑事判决书		简易			0	（2017）豫0781刑初369号	1	陈某某			1																2017-12-04	取保候审	不存在明确被害人的纠纷												0	0	0
00557_529沈某甲危险驾驶罪一审刑事判决书		简易			0	（2019）苏0282刑初529号	1	被告人										务工		务工						2019-05-20	2019-05-08	取保候审 逮捕	不存在明确被害人的纠纷												0	0	0				1		1
00558_李明轩等合同诈骗一审刑事判决书					0	（2012）郑刑一初字第94号	2	李明轩	1974-02-23	完全刑事责任能力	1	38			汉族											2012-02-11	2012-07-19	拘留 逮捕	其他存在明确被害人的纠纷						关喆	张同喜			河南信心律师事务所	河南世鼎律师事务所	0	0	0
00559_黄文波行贿罪2016刑初221一审刑事判决书					0	（2016）粤01刑初221号	1	黄某甲														广东省龙川县	广东省惠州市惠城区				2016-04-20	取保候审	不存在明确被害人的纠纷												0	0	0				1
00560_胡志国受贿一审刑事判决书					0	（2018）湘01刑初39号	1	胡志国	1962-02-05	完全刑事责任能力	1	56			汉族			其他		原任长沙市公安局党委委员、经济犯罪侦查支队支队长（副县级）		湖南省湘乡市	长沙市雨花区		高等专科学校	2018-04-18		逮捕	不存在明确被害人的纠纷						马峻				湖南三湘律师事务所		1	0	0				1
00574_朱国安危险驾驶一审刑事判决书		简易			0	（2017）豫1503刑初253号	1	朱国安	1987-06-01	完全刑事责任能力	1	30			汉族			务农		务农		河南省信阳市	河南省信阳市平桥区		普通高级中学		2017-05-23	拘留 监视居住	不存在明确被害人的纠纷												0	0	0				1
00591_汤浩、刘凡盗窃一审刑事判决书					0	（2018）湘0408刑初26号	2	汤浩	1991-09-29	完全刑事责任能力	1	27			汉族			无业		无业					初中	2017-09-21	2018-01-19	拘留 逮捕 取保候审	其他存在明确被害人的纠纷												0	0	0
00592_邱建恒受贿一审刑事判决书					0	（2018）粤1821刑初183号	1	邱建恒	1969-04-17	完全刑事责任能力	1	49	0	0	汉族			其他		其他	广州市海珠区		佛冈县	中国	高等专科学校	2018-03-30	2018-09-20	逮捕	不存在明确被害人的纠纷						李庆波				广东民诚众信律师事务所		0	0	0				1
00593_叶江南故意伤害一审刑事判决书			1	0	0	（2017）桂0981刑初282号	1	叶江南	1990-01-18	完全刑事责任能力	1	27			汉族			务农		务农			广西壮族自治区北流市		初中	2016-11-24		拘留 逮捕	其他存在明确被害人的纠纷												0	0	0	1
00594_覃巍强徇私枉法罪一审刑事判决书					0	（2019）桂0981刑初435号	1	覃巍强	1972-11-21	完全刑事责任能力	1	47			汉族			其他		其他	广西壮族自治区容县		广西壮族自治区容县	中国	大学本科	2019-09-18	2019-11-18	拘留 逮捕	不存在明确被害人的纠纷						江喜才	覃思斯			广西峤山绣水律师事务所	广西峤山绣水律师事务所	0	0	0				1	1	1
00595_高军德敲诈勒索罪一审刑事判决书		普通			0	（2018）浙0482刑初895号	1	高军德	1982-11-11	完全刑事责任能力	1	36	1	1	汉族			其他		其他	浙江省嘉兴市南湖区	宁夏回族自治区海原县		中国	小学	2018-07-12	2018-12-01	拘留 逮捕	其他存在明确被害人的纠纷						朱勤明				浙江泽大（平湖）律师事务所		0	0	0				1
00596_吴坚庭盗窃一审刑事判决书					0	（2014）江蓬法刑初字第68号	1	吴某庭	1986-03-05	完全刑事责任能力	1	27	1	1	汉族							广东省恩平市				2013-10-01	2013-12-14	拘传 拘留 逮捕	其他存在明确被害人的纠纷												0	0	0				1
00597_乔占全、王磊盗窃一审刑事判决书		普通			0	（2017）津0104刑初25号	2	乔某某	1977-07-07	完全刑事责任能力	1	40	1	1	汉族			无业		无业		河北省任丘市	河北省任丘市		初中	2016-04-20	2016-12-28	拘留 逮捕	其他存在明确被害人的纠纷						苏东红				天津亚泽律师事务所		0	0	0
00598_巴彦淖尔市临河区人民检察院指控原审被告人王力军犯非法经营罪一案再审刑事判决书			0	0	0	（2017）内08刑再1号	1	王力军	1970-09-13	完全刑事责任能力	1	47			汉族			务农		务农		内蒙古自治区巴彦淖尔市临河区	内蒙古自治区巴彦淖尔市临河区		初中				不存在明确被害人的纠纷												0	0	0			0
00599_向磊以危险方法危害公共安全案一审刑事判决书					0	（2016）鄂0527刑初164号	1	向磊	1988-07-24	完全刑事责任能力	1	27	1	1												2016-06-08	2016-11-23	拘留 逮捕	不存在明确被害人的纠纷						杜开春				湖北楚天剑律师事务所		0	0	0
00600_王荣根盗窃一审刑事判决书					0	（2017）晋0728刑初137号	1	王荣根			1		1	1	汉族						山西省平遥县			中国		2017-07-14	2017-09-25	拘留 逮捕	其他存在明确被害人的纠纷												0	0	0
00601_蔡营、段娟娟、袁华伟等走私、贩卖、运输、制造毒品罪一审刑事判决书		普通			0	（2015）杭拱刑初字第590号	6	段娟娟	1984-06-10	完全刑事责任能力	0	32	0	1	汉族			务农		务农	安徽省涡阳县			中国	初中	2014-11-28	2015-08-09	拘留 逮捕	不存在明确被害人的纠纷						梅锴		1		浙江三道律师事务所		0	0	0
00602_田月霞寻衅滋事一审刑事判决书					0	（2018）粤2071刑初1554号	1	田月霞	1976-11-15		0				汉族			其他		其他	广东省中山市	广东省中山市		中国	高等专科学校		2018-07-04	取保候审	其他存在明确被害人的纠纷						梁蕴姿				广东邦仁律师事务所		0	0	0
00604_简某非法狩猎一审刑事判决书					0	2018）豫1527刑初259号	1	简某	1965-10-01	完全刑事责任能力	1	53	0		汉族			务农		务农	河南省淮滨县		河南省淮滨县	中国			2018-08-20	取保候审	不存在明确被害人的纠纷						郑启龙				河南正声律师事务所		0	0	0				1	1
00605_张会康、殷汝亮抢劫一审刑事判决书					0	（2015）文刑初字第182号	2	张会康		完全刑事责任能力											云南省文山市		云南省文山市	中国		2015-03-18	2015-06-15	拘留 逮捕	其他存在明确被害人的纠纷												0	0	0				1
00606_谭启扬、邝国华走私、贩卖、运输、制造毒品、非法制造、买卖、运输、邮寄、储存枪支、弹药、爆炸物一审刑事判决书					0	（2015）穗中法刑一初字第307号	4	谭启扬	1970-10-16	完全刑事责任能力	1	46			汉族						广州市白云区	广东省广州市		中国	小学	2014-12-19	2015-09-06	拘留 逮捕	不存在明确被害人的纠纷						王伟深				广东纬韬律师事务所		0	0	0
00607_万XX行贿一审刑事判决书		简易			0	（2017）津0102刑初445号	1	万XX			0				汉族			其他		其他	北京市	北京市	北京市顺义区	中国	大学本科	2016-11-14	2017-10-24	拘留 逮捕	不存在明确被害人的纠纷						马兵	王安妮			马兵，	张盈律师事务所	0	0	0				1
00608_郭书雅走私、贩卖、运输、制造毒品、非法持有毒品一审刑事判决书					0	（2018）粤01刑初39号	1	郭书雅	1991-06-20	完全刑事责任能力	0	26			汉族						浙江省温州市鹿城区		广东省广州市花都区	中国	小学	2017-08-18	2018-01-21	拘留 逮捕	不存在明确被害人的纠纷						朱海波	谭维红			广东智洋律师事务所	广东穗华律师事务所	0	0	0
00609_马某猥亵儿童罪一审刑事判决书		简易			0	（2018）浙0110刑初1066号	1	马某	1962-11-10	完全刑事责任能力	1	56			汉族			其他		其他			河南省邓州市		初中	2018-08-07	2018-10-29	拘留 逮捕	其他存在明确被害人的纠纷						朱晓纯		1		浙江诺力亚律师事务所		0	0	0				1
00610_陈某、陈某、陈某走私、贩卖、运输、制造毒品罪，容留他人吸毒罪一审刑事判决书					0	（2014）穗越法刑初字第1189号	3	陈某甲	1985-06-10	完全刑事责任能力	1	29			汉族						广东省汕尾市	广东省汕尾市	广东省广州市越秀区	中国	小学	2014-07-15	2014-09-03	拘留 逮捕	不存在明确被害人的纠纷						陈平				广东同益律师事务所		0	0	0
00611_王某甲强奸罪二审刑事判决书			1		0	（2014）郑刑二终字第82号	1	王某甲		完全刑事责任能力	1	40			汉族											2013-05-28		逮捕	其他存在明确被害人的纠纷						殷仁运				河南国基律师事务所		0	0	0		1	0
00612_傅茂清等贩卖、制造毒品二审刑事判决书			1		0	（2013）川刑终字第531号	5	曾忠勇	1958-05-05	完全刑事责任能力	1	55			汉族											2011-05-19		拘留 逮捕	不存在明确被害人的纠纷						巫江				四川英特信联合律师事务所		0	0	0		1	0
00613_吕文新、姚三乃非法经营罪一审刑事判决书					0	（2015）佛顺法刑初字第1567号	2	吕某新																		2014-08-11	2015-05-12	拘留 逮捕	不存在明确被害人的纠纷						宋歌	夏杏媚			广东派力律师事务所	广东派力律师事务所	0	0	0
00614_侯某走私、贩卖、运输、制造毒品一审刑事判决书		简易			0	（2016）粤0114刑初1376号	1	侯某															贵州省铜仁市玉屏侗族自治县			2016-03-28	2016-09-08	拘留 逮捕	不存在明确被害人的纠纷												0	0	0
00615_严某某组织、领导传销活动一审刑事判决书		简易			0	（2018）鄂0112刑初591号	1	严某某					0													2018-07-13	2018-10-11	逮捕 拘留	不存在明确被害人的纠纷						肖小勇				湖北得伟君尚律师事务所		0	0	0				1
00617_被告人赵士华、王丁力、薛平、侯克军贩卖毒品、被告人任东侠、张影贩卖毒品罪、容留他人吸毒案一审刑事判决书					0	（2015）淮刑初字第00031号	6	赵士华	1978-12-28	完全刑事责任能力	1	38			汉族			无业		无业		安徽省濉溪县	安徽省淮北市烈山区		普通高级中学	2015-04-24	2015-11-23	拘留 逮捕	不存在明确被害人的纠纷						杨超				安徽胜方律师事务所		0	0	0
00618_许晓峰危险驾驶一审刑事判决书		速裁			0	（2018）豫0184刑初551号	1	许晓峰	1992-10-23	完全刑事责任能力	1	25	0		汉族			务农		务农			河南省商城县		初中		2018-06-06	拘留 取保候审	不存在明确被害人的纠纷												0	0	0
00619_李庆财、陈庆裕走私、贩卖、运输、制造毒品一审刑事判决书					0	（2015）厦刑初字第133号	3	李庆财	1972-10-20	完全刑事责任能力	1	43			汉族			无业		无业	福建省长汀县		福建省厦门市同安区	中国	初中	2015-03-13	2015-09-21	拘留 逮捕	不存在明确被害人的纠纷						张军	卢江雄			福建汇丰联盟律师事务所	福建汇丰联盟律师事务所	0	0	0
00620_袁辉犯走私、贩卖、运输、制造毒品罪、容留他人吸毒罪等占宏斌、董克锋等犯走私、贩卖、运输、制造毒品罪、流氓罪一审刑事判决书					0	（2016）鄂02刑初15号	7	袁辉										其他		其他						2015-07-24	2016-05-10	逮捕 拘留	不存在明确被害人的纠纷						柯汉英				湖北群力律师事务所		0	0	0
00621_吴广战盗窃一审刑事判决书					0	（2017）豫0926刑初446号	1	吴广战	1988-08-06	完全刑事责任能力	1	29			汉族			无业		无业	山东省济宁市邹城市			中国	小学	2017-09-30	2017-12-15	拘留 逮捕	其他存在明确被害人的纠纷						杜正飞				山东锦心源律师事务所		0	0	0
00622_2291周斌强奸罪一审刑事判决书		简易转普通			0	（2017）苏0583刑初2291号	1	周斌	1988-01-04	完全刑事责任能力	1	30	1	1	汉族			其他		其他			江苏省昆山市		中专（包括职业高中，中等专业学校，技工学校）	2017-06-22	2017-12-04	拘留 逮捕	其他存在明确被害人的纠纷												0	0	0
00623_朱文军、陈学平走私、贩卖、运输、制造毒品罪一审刑事判决书					0	（2018）渝01刑初45号	2	朱文军			1															2018-02-06	2018-04-25	拘留 逮捕	不存在明确被害人的纠纷						谭友成		1		重庆市法律援助中心		0	0	0
00624_罗婷婷、王华一审刑事判决书					0	（2014）惠中法刑一初字第64号	5	罗婷婷	1984-09-12	完全刑事责任能力	0	30			汉族						湖南省南县			中国	高等专科学校	2013-08-13	2014-04-28	拘留 逮捕	不存在明确被害人的纠纷						欧阳俊胜	熊仲民			广东人为律师事务所	广东人为律师事务所	0	0	0
00625_邹乾明非法持有毒品审判监督刑事判决书					0	（2018）沪0115刑再2号	1	邹乾明	1945-12-05	完全刑事责任能力	1	72			汉族						上海市虹口区			中国			2017-05-04		不存在明确被害人的纠纷						曹敏欢		1		上海石天律师事务所		0	0	0		1	1
00626_周明伟犯走私、贩卖、运输、制造毒品罪一审刑事判决书		简易			0	（2016）渝0102刑初708号	1	周明伟	1973-11-03	完全刑事责任能力	1	32	1	1	汉族			无业		无业		重庆市涪陵区	重庆市涪陵区		初中	2016-11-11	2016-12-01	拘留 逮捕	不存在明确被害人的纠纷												0	0	0
00628_王传商、周贤林等走私、贩卖、运输、制造毒品罪一审刑事判决书					0	（2017）琼01刑初104号	4	王传商	1980-08-15	完全刑事责任能力	1	37			汉族			无业		无业	海口市		海南省海口市	中国	初中	2016-12-13	2017-09-01	拘留 逮捕	不存在明确被害人的纠纷						王海山	黄译萱			海南嘉勋律师事务所	海南嘉勋律师事务所	0	0	0				1
00629_陶良三、卓开明走私、贩卖、运输、制造毒品、非法持有、私藏枪支、弹药二审刑事判决书			1	1	0	（2016）川刑终232号	3	陶良三	1972-01-05	完全刑事责任能力	1	44	1	1	汉族			务农		务农	四川省金堂县	四川省金堂县		中国	小学	2015-04-02		拘留 逮捕	不存在明确被害人的纠纷						张冬				北京炜衡（成都）律师事务所		0	0	0		1	1
00630_柏荣非法制造、买卖、运输、邮寄、储存枪支、弹药、爆炸物、走私、贩卖、运输、制造毒品一审刑事判决书					0	（2017）粤1972刑初1127号	1	柏荣																		2017-04-29	2017-06-01	拘留 逮捕	不存在明确被害人的纠纷						舒荣				广东莞融律师事务所		0	0	0
00631_王伟走私、贩卖、运输、制造毒品罪、非法持有、私藏枪支、弹药罪二审刑事判决书			1		0	（2017）湘刑终104号	1	王伟	1979-10-31	完全刑事责任能力	1	38		1	汉族			无业		无业		湖南省新宁县	新宁县		初中	2013-07-02		拘留 逮捕	不存在明确被害人的纠纷 不存在明确被害人的纠纷						罗春根				湖南红雨律师事务所		0	0	0	0	1	1		1
00632_解某犯侵犯著作权罪一审刑事判决书		普通			0	（2015）新知刑初字第0008号	1	解某																			2015-11-04	取保候审	其他存在明确被害人的纠纷												0	0	0
00633_张忠平、张忠元诈骗一审刑事判决书					0	（2017）吉0112刑初11号	2	张忠平	1963-04-07	完全刑事责任能力	1	54		1	汉族			无业		无业			吉林省长春市双阳区		初中	2016-07-25	2017-01-05	拘留 取保候审 拘留 逮捕	其他存在明确被害人的纠纷						王晓光				吉林王晓光律师事务所		0	0	0
00634_郑文源犯走私、贩卖、运输、制造毒品罪、非法持有、私藏枪支、弹药罪徐崔雄、袁芬犯走私、贩卖、运输、制造毒品罪一审刑事判决书					0	（2014）扬刑二初字第0007号	3	郑文源																		2014-04-18	2014-08-22	拘留 逮捕	不存在明确被害人的纠纷 不存在明确被害人的纠纷						邵长胜				江苏衡鼎律师事务所		0	0	0					1
00635_翁某重婚二审刑事判决书			1		0	（2016）赣11刑终39号	1	翁某																		2015-10-22		拘留 逮捕	其他存在明确被害人的纠纷												0	0	0	0	1	0	1
00636_何远振、师磊犯生产、销售假药罪一审刑事判决书					0	（2015）浙台刑二初字第25号	2	何远振										其他		有限公司中药部负责人						2014-12-31	2015-12-15	拘留 逮捕	其他存在明确被害人的纠纷						万敏				浙江剑正律师事务所		0	0	0
00637_郑永廷犯假冒注册商标罪一审刑事判决书					0	（2015）宿中知刑初字第0003号	1	郑永廷																		2014/5/9#2015/6/12	2015-03-17	拘留 逮捕 取保候审 逮捕	其他存在明确被害人的纠纷						李忠安				江苏力胜律师事务所		0	0	0
00638_高飞、王宏天贩卖毒品、戴耀午非法持有毒品一审刑事判决书			1	0	0	（2013）朝刑再重字第1号	3	高飞			1										长春市宽城区			中国		2007-12-27	2008-07-07	拘留 逮捕	不存在明确被害人的纠纷						李广军	刘影			吉林宇中人律师事务所	吉林宇中人律师事务所	0	0	0		1
00639_赖小志、向定兵走私、贩卖、运输、制造毒品一审刑事判决书					0	（2015）成刑初字第168号	5	赖小志	1975-09-05	完全刑事责任能力	1	41	1	1	汉族		0	务农		务农	成都市青白江区			中国	初中	2014-09-11		拘留 逮捕	不存在明确被害人的纠纷						姚林				四川天则律师事务所		0	0	0
00640_樊红燕走私、贩卖、运输、制造毒品一审刑事判决书		普通			0	（2019）赣0826刑初27号	1	樊红燕	1974-01-25	完全刑事责任能力	0	45	1	1	汉族		0	无业		无业	河南省漯河市临颍县	河南省临颍县	吉州区	中国	初中	2018-08-10	2019-01-22	取保候审 拘留 逮捕	不存在明确被害人的纠纷												0	0	0
00641_邓成贵强奸罪一审刑事判决书		简易			0	（2019）闽0582刑初2778号	1	邓成贵	1994-07-05	完全刑事责任能力	1	25			汉族			务工		务工		云南省镇雄县	镇雄县		小学	2019-08-02	2019-10-28	拘留 逮捕	其他存在明确被害人的纠纷												0	0	0
00642_朱某某故意毁坏财物罪一审刑事判决书		简易			0	（2017）宁0122刑初175号	1	朱某某	1990-05-09	完全刑事责任能力	1	27		1	汉族						宁夏回族自治区中宁县		宁夏回族自治区贺兰县	中国	初中	2017-06-15	2017-07-17	拘留 逮捕	其他存在明确被害人的纠纷						王晓蕾	刘启			北京市中银（银川）律师事务所	北京市中银（银川）律师事务所	0	0	0
00643_徐公长故意伤害一审刑事判决书		普通			0	（2017）豫1627刑初206号	1	徐公长	1968-11-15	完全刑事责任能力	1	49			汉族			务农		务农			河南省太康县		初中	2017-01-21		拘留 逮捕	其他存在明确被害人的纠纷						董伦涛				河南豫太律师事务所		0	0	1
00644_李翔危险驾驶一审刑事判决书		普通			0	（2019）豫0305刑初291号	1	李翔	1992-01-27	完全刑事责任能力	1	27	0	0	汉族								河南省洛阳市涧西区		大学本科		2019-05-29	拘留 取保候审	其他存在明确被害人的纠纷												0	0	0				1		1
00645_黄阿针、赵宗樸、李钟林等非法经营罪一审刑事判决书		普通			0	（2017）浙0381刑初1947号	5	黄阿针	1980-01-20	完全刑事责任能力	0	38			汉族			务工		务工	福建省云霄县	福建省云霄县		中国	小学	2017-06-28	2017-11-17	拘留 逮捕	其他存在明确被害人的纠纷						张康祥				浙江玉海律师事务所		0	0	0				1
00646_被告人许某某滥用职权、被告人孔某某玩忽职守罪一案一审刑事判决书					0	（2013）睢刑初字第183号	2	许某某	1969-09-12	完全刑事责任能力	1	44			汉族			其他		农技站副站长		河南省睢县			大学本科		2013-10-25	拘留 取保候审	其他存在明确被害人的纠纷												0	0	0				1	1	1
00647_朱军强奸一审刑事判决书					0	（2013）甬宁刑初字第451号	1	朱军	1984-05-06	完全刑事责任能力	1	29			汉族			务农		务农		安徽省涡阳县	安徽省涡阳县		初中	2013-04-24	2013-08-07	拘留 逮捕	其他存在明确被害人的纠纷						金国进				浙江跃龙律师事务所		0	0	0
00648_何卫兵犯故意伤害罪一审刑事判决书					0	（2015）眉刑初字第26号	1	何卫兵	1971-04-17	完全刑事责任能力	1	44			汉族						四川省洪雅县			中国	初中	2015-04-03	2015-10-19	拘留 逮捕	其他存在明确被害人的纠纷												0	0	0
00649_罗某非法占用农用地罪一审刑事判决书					0	（2017）鄂1083刑初120号	1	罗某										务农		务农							2017-07-13	拘留 取保候审	不存在明确被害人的纠纷												0	0	0					1
00650_李某某故意杀人一审刑事判决书		普通			0	（2015）汕濠法刑初字第126号	1	李某某	1988-05-15	完全刑事责任能力	0	27			汉族										小学	2015-04-11	2015-09-15	拘留 逮捕	其他存在明确被害人的纠纷												0	0	0				1	1
00651_李某某污染环境一审刑事判决书					0	（2018）冀0929刑初44号	1	李某某	1986-08-01	完全刑事责任能力	1	32			汉族			务农		务农	河北省保定市蠡县			中国	小学	2017-12-28	2018-02-05	拘留 逮捕	不存在明确被害人的纠纷												0	0	0
00652_林辉、陈红清故意杀人、强奸一审刑事判决书					0	（2015）岩刑初字第38号	2	林辉	1976-04-08	完全刑事责任能力	1	41			汉族			其他		有限责任公司职工		福建省福州市	福建省福州市仓山区		初中	2015-05-01	2015-11-16	拘留 逮捕	其他存在明确被害人的纠纷 其他存在明确被害人的纠纷						林宇	陈光儒			福建远东大成律师事务所	福建耀远律师事务所	0	0	1					1
00653_被告人张一非法吸收公众存款纠纷一案一审刑事判决书					0	（2016）晋0728刑初148号	1	张一			1				汉族						山西省平遥县			中国		2016-09-13	2016-11-25	拘留 逮捕	不存在明确被害人的纠纷						郭晓东				山西晋陶律师事务所		0	0	0				1
00654_谢虎侵犯公民个人信息一审刑事判决书					0	（2018）闽0802刑初159号	1	谢虎	1989-08-03	完全刑事责任能力	1	29			汉族			务农		务农	龙岩市新罗区	龙岩市新罗区		中国	初中	2017-11-23	2018-03-05	拘留 逮捕	其他存在明确被害人的纠纷						卢坤				福建天岩律师事务所		0	0	0
00701_严井平、汤慧民开设赌场、故意伤害、非法拘禁、寻衅滋事一审刑事判决书		普通			0	（2018）赣0881刑初56号	12	严井平	1986-09-25	完全刑事责任能力	1	33	1	1	汉族							江西省井岗山市			初中	2018-05-10	2018-10-08	逮捕 取保候审 拘留	不存在明确被害人的纠纷#其他存在明确被害人的纠纷						袁宁辉	肖满芬			江西文星律师事务所	江西文星律师事务所	0	0	0				1
00703_杨义勇抢劫一审刑事判决书					0	（2015）大刑初字第220号	1	杨义勇	1981-09-10	完全刑事责任能力	1	34		1	汉族			务农		务农		云南省巍山县	云南省巍山县		初中	2015-04-28	2015-07-17	拘留 逮捕	其他存在明确被害人的纠纷												0	0	0					1
00704_马泽森马泽武等强迫交易罪一审刑事判决书		普通			0	（2018）渝0107刑初1120号	5	马泽森	1990-12-24	完全刑事责任能力	1	28			汉族			无业		无业		广东省汕头市			初中	2014-05-25	2018-09-19	拘留 逮捕	其他存在明确被害人的纠纷						饶嘉陵	张大妙			重庆百众律师事务所	重庆百众律师事务所	0	0	0
00705_李正华合同诈骗罪一审刑事判决书					0	（2019）藏05刑初3号	1	李正华	1970-07-13	完全刑事责任能力	1	49	0	0	汉族		0	其他		有限公司法定代表人	四川省成都市新津县			中国	普通高级中学	2018-06-29	2019-03-07	拘留 逮捕	其他存在明确被害人的纠纷						李武玲	郭振楠			西藏法鉴律师事务所	西藏法鉴律师事务所	0	0	0				0	0
00706_包头市青山区人民检察院与李某污染环境罪一审刑事判决书					0	（2018）内0204刑初519号	1	李某	1985-02-12	完全刑事责任能力	1	33	0	0	汉族		0	其他		经营塑料颗粒厂	河北省邯郸市魏县			中国	小学	2018-09-06	2018-11-13	拘留 逮捕	不存在明确被害人的纠纷						刘博		1		包头市青山区法律援助中心		0	0	0
00707_和福军故意杀人、非法持有、私藏枪支、弹药、盗窃二审刑事判决书			1		0	（2017）云07刑终72号	1	和福军	1977-09-13	完全刑事责任能力	1				纳西族			务农		务农	云南省玉龙县人			中国	小学	2016-10-18		拘留 取保候审 拘留 逮捕	其他存在明确被害人的纠纷												0	0	0		1	0
00708_夏威、徐冬故意伤害、寻衅滋事一审刑事判决书					0	（2017）皖10刑初8号	5	夏威	1988-08-12	完全刑事责任能力	1	30	1	1	汉族			无业		无业	安徽省黄山市屯溪区		屯溪区	中国	初中	2016-11-30	2017-07-10	拘留 逮捕	其他存在明确被害人的纠纷						程东风				安徽雄风律师事务所		0	0	0
00709_蒋美凤虚开增值税专用发票、用于骗取出口退税、抵扣税款发票一审刑事判决书					0	（2018）沪0118刑初1012号	1	蒋某某										其他		经营公司							2018-08-22														0	0	0
00710_任奎犯强奸罪一审刑事判决书					0	（2018）陕0422刑初112号	1	任奎			1															2018-08-13	2018-10-18	拘留 逮捕	其他存在明确被害人的纠纷												0	0	0				1
00712_任施波交通肇事二审刑事判决书			1		0	（2018）冀10刑终39号	1	任施波	1984-09-24	完全刑事责任能力	1	34			汉族			其他		个体	河北省霸州市			中国	小学	2017-08-24		拘留 逮捕	其他存在明确被害人的纠纷												0	0	0		1	0
00714_盛某甲、盛某乙等寻衅滋事罪一审刑事判决书		普通			0	（2014）杭余刑初字第370号	5	盛某甲																		2014-01-18	2014-03-20	拘留 逮捕	其他存在明确被害人的纠纷												0	0	0				1
00715_魏海平、黄润平故意杀人、组织、领导、参加黑社会性质组织、聚众斗殴、故意伤害、故意毁坏财物、寻衅滋事一审刑事判决书					0	（2016）粤13刑初127号	4	魏海平	1971-07-01	完全刑事责任能力	1	47			汉族						广东省惠州市博罗县			中国	小学	2015-07-24		拘留 逮捕	其他存在明确被害人的纠纷						李世勇		1		广东人为律师事务所		0	0	0
00716_李某某一审刑事判决书		速裁			0	（2019）粤0106刑初596号	1	李某某	1997-09-09	完全刑事责任能力	1	22			汉族						广东省普宁市	广东省普宁市		中国	初中	2019-03-07		逮捕 逮捕	其他存在明确被害人的纠纷												0	0	0
00717_尹荣迅故意伤害一审刑事判决书					0	（2016）云03刑初113号	1	尹荣迅	1987-04-26	完全刑事责任能力	1	29			汉族			其他		教师	云南省富源县		富源县	中国	大学本科	2016-02-06	2016-08-16	拘留 逮捕	其他存在明确被害人的纠纷						庄福东				云南知志律师事务所		0	0	1
00718_郁某危险驾驶一审刑事判决书		简易			0	（2014）黄浦刑初字第532号	1	郁某																			2014-05-26		不存在明确被害人的纠纷												0	0	0				1
00719_骆明君、骆兴红诈骗罪一审刑事判决书		简易			0	（2016）浙0782刑初2796号	2	骆明君	1966-02-23	完全刑事责任能力	1	50		1	汉族							浙江省义乌市	浙江省义乌市		小学		2016-11-04	拘留 取保候审	其他存在明确被害人的纠纷												0	0	0
00720_只金铎非法持有枪支、非法运输、储存爆炸物二审刑事判决书			1		0	（2014）喀中刑终字第214号	1	只金铎																					其他存在明确被害人的纠纷						王先平	长春			新疆驼铃律师事务所	新疆卓慧律师事务所	0	0	0		1	0
00721_程某聚众斗殴罪一审刑事判决书					0	（2015）灵刑初字第00194号	1	程某	1995-04-15	完全刑事责任能力	1	20			汉族			务农		务农		安徽省灵璧县	灵璧县			2015-02-11	2015-04-21	拘留 逮捕	其他存在明确被害人的纠纷						宋颖				安徽杨夫胜律师事务所		0	0	0
00722_张某、唐某等寻衅滋事罪陈有寻衅滋事罪、危险驾驶罪一审刑事判决书					0	（2018）皖1021刑初95号	8	张旺宝	1981-01-10	完全刑事责任能力	1	37			汉族			无业		无业	祁门县	安徽省祁门县	安徽省黄山市屯溪区	中国	初中	2017-12-06	2018-06-26	逮捕 拘留	其他存在明确被害人的纠纷						吴元华		1		安徽久安律师事务所		0	0	0				1
00723_被告人程剑、刘玉国、郑忠华、吴宝宝、杨某等聚众斗殴罪、非法持有枪支、容留他人吸毒一审刑事判决书		普通			0	（2014）雨刑初字第152号	11	程剑	1990-09-01	完全刑事责任能力	1	24		1	汉族											2014-04-11	2014-11-24	拘留 逮捕	其他存在明确被害人的纠纷						李伟根	王小虹			江苏和忠律师事务所	江苏和忠律师事务所	0	0	0
00724_冶某甲、马某甲、冶某乙、马某某寻衅滋事案二审刑事判决书					0	（2017）青02刑终63号	4	马某某	1993-11-14	完全刑事责任能力	1	24			回族			无业		无业		青海省民和回族土族自治县	民和回族土族自治县		普通高级中学	2017-03-15		拘留 取保候审 逮捕	其他存在明确被害人的纠纷						卢祎辰	巩志强			青海齐光律师事务所	青海齐光律师事务所	0	0	0		0	1
00725_戴某、方某等犯寻衅滋事罪、盗窃罪等一审刑事判决书		普通			0	（2016）浙0503刑初148号	5	戴某																		2015-12-25		拘留 逮捕	其他存在明确被害人的纠纷												0	0	0
00726_王兴彬赌博罪、聚众斗殴罪田二蒙、李伟等聚众斗殴罪一审刑事判决书					0	（2018）苏1282刑初491号	10	王兴彬	1979-10-29	完全刑事责任能力	1	40						无业		无业			靖江市			2019-04-25	2018-09-04	逮捕 取保候审	不存在明确被害人的纠纷						赵杞				江苏谦尊律师事务所		0	0	0				1
00727_滕志故意伤害罪左学良、李君等寻衅滋事罪一审刑事判决书					0	（2017）湘12刑初7号	6	滕志	1994-09-09	完全刑事责任能力	1	23			苗族			务农		务农					初中	2016-04-27	2017-02-06	拘留 逮捕	其他存在明确被害人的纠纷						向宽贵				湖南锦怀律师事务所		0	0	0
00728_林群辉故意毁坏财物罪一审刑事判决书					0	（2018）闽0582刑初1672号	1	林群辉	1989-11-07	完全刑事责任能力	1	29			汉族			务工		务工	晋江市		晋江市	中国	初中		2018-07-04	取保候审	其他存在明确被害人的纠纷						李文质	黄晓明			福建麒顺律师事务所	福建麒顺律师事务所	0	0	0				1	1
00729_刘某某寻衅滋事罪一审刑事判决书		普通			0	（2014）万法刑初字第00955号	1	刘某某			1				汉族			无业		无业					初中	2014-04-04	2014-08-22	拘留 逮捕	其他存在明确被害人的纠纷												0	0	0
00731_余国超、于纪凯故意杀人一审刑事判决书					0	（2017）浙01刑初46号	3	余国超	1987-05-08	完全刑事责任能力	1	30			汉族			无业		无业	霍邱县			中国	初中	2016-06-29	2017-03-22	拘留 逮捕	其他存在明确被害人的纠纷						徐建民				浙江星韵律师事务所		0	0	1
00732_冯智皓犯贪污罪、挪用公款罪等二审刑事判决书			1		0	（2015）苏刑二终字第00019号	1	冯智皓										其他		主任、有限公司总经理、有限责任公司经理						2012-12-23		监视居住 逮捕	其他存在明确被害人的纠纷						鲁民	方磊			江苏世纪同仁律师事务所	江苏世纪同仁律师事务所	0	0	0
00733_王某对非国家工作人员行贿一审刑事判决书					0	（2015）佛顺法刑初字第4454号	1	王某	1984-01-06	完全刑事责任能力	1	32		1	汉族			无业		无业	广东省惠来县			中国	普通高级中学	2014/8/16#2016/1/15	2015-12-09	拘留 逮捕 取保候审 逮捕	不存在明确被害人的纠纷						姚娅妮	马状立			广东力创律师事务所	广东木铎律师事务所	0	0	0
00734_陈伟照、曾庆桃非法持有毒品一审刑事判决书		普通			0	（2017）粤1203刑初76号	3	陈伟照	1970-11-04	完全刑事责任能力	1	47		1	汉族			无业		无业			广东省肇庆市高要区		小学	2017-06-02	2017-09-12	拘留 逮捕	不存在明确被害人的纠纷												0	0	0
00735_曹某、唐某、曾某串通投标罪再审刑事判决书					0	（2016）湘0302刑再字1号	3	曹某																			2015-12-25	取保候审 取保候审	不存在明确被害人的纠纷						彭新武				湖南惟明律师事务所		0	0	0			1	1	1
00736_侯金辉故意杀人一审刑事判决书					0	（2018）京02刑初100号	1	侯金辉	1973-05-03	减轻刑事责任能力	1	45			汉族				0		北京市大兴区			中国		2018-05-29	2018-08-24	逮捕	家庭纠纷						侯兵彦		1		北京市东元律师事务所		0	0	1				1
00737_黄定华故意伤害罪一审刑事判决书					0	（2013）浙绍刑初字第118号	1	黄定华																		2013-05-06	2013-12-06	拘留 逮捕	其他存在明确被害人的纠纷						刘晋辉						0	0	0
00738_区结华、邓文武组织、领导传销活动二审刑事判决书			1		0	（2018）粤06刑终345号	2	区结华	1977-08-07	完全刑事责任能力	0	41			汉族			其他		有限公司法定代表人、股东	广东省佛山市高明区			中国	初中	2017-08-24		拘留 逮捕	不存在明确被害人的纠纷						李志玲				广东共明律师事务所		0	0	0		1	1
00739_杜朝集非法持有毒品一审刑事判决书					0	（2017）云31刑初23号	1	杜朝集	1985-09-07	完全刑事责任能力	1	32	1	1	汉族			务农		务农	云南省盈江县		云南省盈江县	中国	小学	2015-06-08	2017-02-23	拘留 取保候审 拘留 逮捕	不存在明确被害人的纠纷						杨文昌		1		云南清诚律师事务所		0	0	0
00740_被告人何某某犯交通肇事罪一审刑事判决书	1				0	（2015）射洪刑初字第45号	1	何某某	1960-12-07	完全刑事责任能力	1	56			汉族			其他		驾驶员	四川省西充县			中国	初中		2015-01-20	拘留 取保候审	其他存在明确被害人的纠纷												0	1	0					1
00741_被告人庞某犯销售有毒、有害食品罪一审刑事判决书					0	（2018）苏0116刑初181号	1	庞某	1951-12-08	完全刑事责任能力	1	67		1	汉族			无业		无业			江苏省南京市六合区		初中	2018-07-04	2018-03-09	取保候审 逮捕	不存在明确被害人的纠纷												0	0	0
00742_付某滥用职权、逃税、行贿、虚开发票一审刑事判决书		普通			0	（2017）冀1128刑初1号	1	付某			1																		不存在明确被害人的纠纷												0	0	0
00743_卢卫东组织他人偷越国（边）境二审刑事判决书				1	0	（2018）云25刑终276号	1	卢卫东	1970-10-20	完全刑事责任能力	1	48			汉族						建水县		河口县	中国	小学	2018-03-26		拘留 逮捕 取保候审	不存在明确被害人的纠纷												0	0	0		1	0	1	1
00744_杨茂富故意伤害一审刑事判决书					0	（2017）粤13刑初44号	1	杨茂富	1988-08-24	完全刑事责任能力	1	29			汉族						江西省吉安市吉安县			中国	初中	2016-08-16	2017-04-06	拘留 逮捕	其他存在明确被害人的纠纷						何广辉				广东定稳顺律师事务所		0	0	0
00745_陈财、陈宝山非法制造、买卖、运输、邮寄、储存枪支、弹药、爆炸物、非法持有、私藏枪支、弹药二审刑事判决书			1		0	（2019）湘10刑终183号	4	陈财	1993-09-28	完全刑事责任能力	1	26			汉族			无业		无业	湖北省武汉市黄陂区		湖北省武汉市黄陂区	中国	小学	2017-10-13		拘留 逮捕	不存在明确被害人的纠纷						刘阳				湖南锐鹏律师事务所		0	0	0
00746_陈某某危险物品肇事罪一审刑事判决书					0	（2015）浉刑一初字第155号	1	陈某某			1																2015-04-03	拘留 取保候审	其他存在明确被害人的纠纷						陈建川				河南银辉律师事务所		0	0	0				1	1
00747_崔艳强、崔艳冬虚开增值税专用发票、用于骗取出口退税、抵扣税款发票一审刑事判决书					0	（2016）冀0982刑初79号	3	崔艳强	1985-10-06	完全刑事责任能力	1	32			汉族			务农		务农		河北省任丘市			初中	2015-05-07	2016-01-17	拘留 逮捕	其他存在明确被害人的纠纷						王永富				河北海岳（任丘）律师事务所		0	0	0
00748_牛奔抢夺罪一审刑事判决书		简易			0	（2018）浙0106刑初364号	1	牛奔	1992-01-11	完全刑事责任能力	1	26			汉族						河南省温县			中国		2018-06-13	2018-06-07	拘留 取保候审 逮捕	其他存在明确被害人的纠纷												0	0	0				1		1
00749_尤国军危险驾驶罪一审刑事判决书		简易			0	（2016）内0102刑初165号	1	尤某某	1954-03-14	完全刑事责任能力	1	62			汉族						呼和浩特市新城区			中国	小学		2016-04-25	拘留 取保候审	不存在明确被害人的纠纷												0	0	0
00750_被告人苗敏敏危险驾驶罪一审刑事判决书		速裁			0	（2018）陕0102刑初457号	1	苗某某	1986-08-10	完全刑事责任能力	0	32			汉族			无业		无业	陕西省西安市临潼区		西安市临潼区	中国			2018-10-08	拘留	不存在明确被害人的纠纷						代宝慧		1		陕西致易衡律师事务所		0	0	0				1		1
00751_傅剑威、刘艺等犯组织、领导、参加黑社会性质组织罪、抢劫罪等二审刑事判决书			1		0	（2014）湘高法刑一终字第241号	26	傅剑威										无业		无业						2010-09-09		逮捕 拘留	其他存在明确被害人的纠纷						杨章保	蔡文卓			北京市德恒（长沙）律师事务所	湖南毓秀律师事务所	0	0	0
00752_宋金才交通肇事罪一审刑事判决书		普通			0	（2016）浙0482刑初146号	1	宋金才	1951-06-01	完全刑事责任能力	1	65			汉族			无业		无业	浙江省平湖市	浙江省平湖市		中国	小学	2016-01-04	2016-02-16	拘留 逮捕	其他存在明确被害人的纠纷												0	0	1
00753_被告人李存刚等二十三人聚众斗殴罪一案一审刑事判决书		普通			0	（2016）云0402刑初165号	21	李某某	1971-06-09	完全刑事责任能力	1	45			汉族										初中	2015-08-21	2016-04-14	逮捕 拘留	其他存在明确被害人的纠纷						胡和				云南世博律师事务所		0	0	0
00754_张某某等故意伤害罪一审刑事判决书					0	（2017）鲁01刑初33号	4	张某某	1979-02-08	完全刑事责任能力	1	38			汉族			无业		无业		山东省济南市	山东省济南市		初中	2016-09-13	2017-06-16	拘留 逮捕	其他存在明确被害人的纠纷												0	0	0
00755_麦某某犯故意伤害罪一审刑事判决书		简易			0	（2011）阿刑初字第05号	1	麦某某			1		0	0												2011-03-11	2011-06-02	拘留 逮捕	其他存在明确被害人的纠纷												0	0	0				1	1
00756_何某某危险驾驶一审刑事判决书		简易			0	（2015）浦刑初字第307号	1	何某某																			2015-01-04		不存在明确被害人的纠纷												0	0	0
00757_被告人殷剑锋抢劫罪一审刑事判决书					0	（2017）苏0118刑初136号	1	殷剑锋	1986-08-03	完全刑事责任能力	1	31	1	1	汉族							江苏省南京市	南京市高淳区			2016-12-20	2017-05-17	拘留 逮捕	其他存在明确被害人的纠纷												0	0	0
00758_冼桂业非法持有、私藏枪支、弹药二审刑事判决书			1		0	（2016）桂04刑终148号	1	冼桂业	1952-07-15	完全刑事责任能力	1	64			汉族			务农		务农		广西壮族自治区苍梧县	苍梧县		普通高级中学	2016-04-13		拘留 取保候审 逮捕	不存在明确被害人的纠纷						林灿				广西皓元律师事务所		0	0	0				1
00759_代守志挪用资金一审刑事判决书					0	（2016）川1423刑初36号	1	代守志	1977-07-20	完全刑事责任能力	1	39											成都市温江区			2014-11-28	2015-03-05	拘留 逮捕	其他存在明确被害人的纠纷						周崇新				四川洪运律师事务所		0	0	0	1
00760_李绪智、杨国庆等十一人聚众斗殴一审刑事判决书					0	（2014）眉刑初字第00011号	11	李绪智			1			1												2013-09-23		拘留 逮捕	不存在明确被害人的纠纷												0	0	0
00761_左会芳一审刑事判决书		普通			1	（2017）豫0928刑初899号	1	左会芳	1990-04-01	完全刑事责任能力	0	28			汉族			务农		务农					小学	2017-12-09	2017-10-18	逮捕													0	0	0					1
00762_郑某某盗窃一审刑事判决书					0	（2015）北刑初字第202号	1	郑某某					1	1				无业		无业						2015-10-28	2015-12-24	拘留 逮捕	其他存在明确被害人的纠纷												0	0	0
00763_涂志强犯故意杀人罪一审刑事判决书					0	（2015）浙杭刑初字第74号	1	涂志强					1	1												2014-12-31	2015-04-27	拘留 逮捕	其他存在明确被害人的纠纷						孙国民						0	0	0
00764_单位上海好锦包装材料有限公司、丁某某虚开增值税专用发票、用于骗取出口退税、抵扣税款发票一审刑事判决书		简易			0	（2015）浦刑初字第2087号	2	上海好锦包装材料有限公司																			2015-05-14														0	0	0
00765_陈欢、唐某1等赌博罪、寻衅滋事罪一审刑事判决书					0	（2018）湘0422刑初269号	3	陈欢	1993-08-28	完全刑事责任能力	1	25			汉族			无业		无业	湖南省衡阳市石鼓区		湖南省衡阳市石鼓区	中国	初中	2018-05-31	2018-10-09	拘留 逮捕							肖锴				湖南君杰律师事务所		0	0	0				1
00766_刘宝刚故意伤害一审刑事判决书					0	（2017）津0110刑初416号	1	刘宝刚	1960-09-13	完全刑事责任能力	1	57			汉族			其他		退休职工	天津市河西区		天津市东丽区	中国	高等专科学校	2017-11-22	2017-05-09	取保候审 逮捕	其他存在明确被害人的纠纷						褚桂民				天津锐尚律师事务所		0	0	1
00767_680刘某危险驾驶罪一审刑事判决书		简易			0	（2018）苏1324刑初680号	1	刘某	1994-02-04	完全刑事责任能力	1	24			汉族			无业		无业			泗洪县				2018-12-20	取保候审	不存在明确被害人的纠纷												0	0	0					1
00768_李日丰、李炳文非法采矿罪一审刑事判决书					0	（2018）琼01刑初30号	2	李日丰	1960-02-07	完全刑事责任能力	1	58			汉族			务农		务农	海南省澄迈县		海南省澄迈县	中国	小学	2017-08-09	2018-02-07	拘留 逮捕	不存在明确被害人的纠纷						王川广				海南金裕律师事务所		0	0	0				1	1
00769_魏某某职务侵占一审刑事判决书					0	（2018）豫1723刑初615号	1	魏某某		完全刑事责任能力	1				汉族			无业		无业					初中	2018-05-26	2018-09-17	拘留 逮捕	其他存在明确被害人的纠纷						杨广运				河南日月星律师事务所		0	0	0				1	1
00771_胡某甲犯妨害作证罪、赌博罪王某犯帮助毁灭、伪造证据罪、赌博罪一审刑事判决书-核对					0	（2015）衢江刑初字第547号	2	胡某甲										其他		经商						2015-04-30	2015-11-27	拘留 逮捕	不存在明确被害人的纠纷						刘超英				浙江虎山律师事务所		0	0	0
00772_蔡镇赏、吴剑沛故意杀人、非法持有、私藏枪支、弹药、故意伤害一审刑事判决书-核对					0	（2018）粤15刑初25号	2	蔡镇赏	1992-08-06	完全刑事责任能力	1	26			汉族			无业		无业	广东省陆丰市			中国	初中	2017-06-30	2018-01-18	拘留 逮捕	其他存在明确被害人的纠纷 不存在明确被害人的纠纷						刘木阶		1		汕尾市公职律师事务所		0	0	0
00773_冯志深非法制造、买卖、运输、邮寄、储存枪支、弹药、爆炸物一审刑事判决书-核对		简易			0	（2018）粤1821刑初255号	1	冯志深	1975-05-12	完全刑事责任能力	1	43	1	1	汉族		0				广东省佛冈县		广东省佛冈县	中国	普通高级中学	2018-11-02	2018-12-12	拘留 逮捕	不存在明确被害人的纠纷						夏林		1		广东德磊律师事务所		0	0	0
00774_岳彩民、赵建民故意伤害、窝藏、包庇一审刑事判决书-核对					0	（2013）宝刑初字第41号	10	岳彩民	1953-01-27	完全刑事责任能力	1	60			汉族							河南省灵宝市	河南省灵宝市		文盲	2012/8/8#2013/8/5	2013-04-11	逮捕 取保候审 逮捕 拘留	其他存在明确被害人的纠纷						陆咏歌	庄海博			金博大律师事务所	河南炳东律师事务所	0	0	0
00775_张桂梅容留他人吸毒一审刑事判决书-核对		简易			0	（2017）津0116刑初20001号	1	张桂梅	1974-01-14	完全刑事责任能力	0	43										辽宁省				2016-09-30	2016-12-24	拘留 逮捕	不存在明确被害人的纠纷												0	0	0				1
00777_被告人冶某1等四人寻衅滋事一案一审刑事判决书-核对		普通			0	（2016）青0222刑初28号	4	冶某1	1991-05-23	完全刑事责任能力	1	26			回族			务农		务农		青海省民和回族土族自治县			小学	2015-09-06	2016-03-07	逮捕	其他存在明确被害人的纠纷						潘明德				青海爱明律师事务所		0	0	0
00778_罗玉强、曹光进走私、贩卖、运输、制造毒品一审刑事判决书-核对					0	（2015）保中刑初字第17号	4	罗玉强	1987-04-26	完全刑事责任能力	1	28			彝族			务农		务农		云南省耿马傣族佤族自治县	耿马县		小学	2014-06-06	2014-12-23	拘留 逮捕	不存在明确被害人的纠纷						单振宁	赵建明			云南山海律师事务所	云南山海律师事务所	0	0	0					1
00779_郑徽明、林振利非法经营一审刑事判决书-核对					0	（2017）闽0181刑初769号	4	郑徽明	1965-01-08	完全刑事责任能力	1	52			汉族			无业		无业		福建省福清市	福建省福清市		初中	2016-08-26	2017-05-27	拘留 逮捕	不存在明确被害人的纠纷						游志兵				福建远东大成律师事务所		0	0	0				1
00780_张某、徐某某故意伤害罪刑事判决书-核对					0	（2013）普刑初字第94号	2	张某	1992/0/0	完全刑事责任能力	1	21			汉族			其他		学生			贵州省		普通高级中学	2013-02-01	2013-09-09	拘留 取保候审 拘留 逮捕	其他存在明确被害人的纠纷						刘某						0	0	0
00781_龚建坤诈骗一审刑事判决书-核对					0	（2018）京0105刑初1484号	1	龚建坤	1956-04-20	完全刑事责任能力	1	63			汉族						河北省承德市			中国	高等专科学校	2017-11-16	2018-07-11	拘留 逮捕	其他存在明确被害人的纠纷						于洪伟				北京乾成律师事务所		0	0	0
00782_陈焕光非法经营、生产、销售伪劣产品一审刑事判决书-核对					0	（2017）豫15刑初25号	1	陈焕光	1963-05-28	完全刑事责任能力	1	54	0	0	汉族			其他		个体工商户	福建省厦门市湖里区		福建省厦门市	中国	普通高级中学	2017-10-13	2017-08-07	拘留 逮捕	不存在明确被害人的纠纷						余海鹰				河南银辉律师事务所		0	0	0				1
00783_杨新民、雷媚、马江龙、刘羊均、刘雷介绍卖淫罪、被告人张志宏犯嫖宿幼女罪一审刑事判决书-核对					0	（2013）临刑初字第00437号	6	杨新民	1965-02-02	完全刑事责任能力	1	49			汉族			务工		金属鎂厂职工					初中	2013-08-24	2013-12-23	取保候审 拘留 逮捕	其他存在明确被害人的纠纷						熊学军				陕西渭临律师事务所		0	0	0
00784_姚某危险驾驶一审刑事判决书-核对		普通			0	（2017）浙0683刑初437号	1	姚某	1984-01-01	完全刑事责任能力	1	33			汉族								浙江省嵊州市		大学本科		2017-07-28	取保候审	不存在明确被害人的纠纷			1	0		李鸣杰	娄啸枫			浙江海州律师事务所	浙江海州律师事务所	0	0	0
00785_林某、张某等抢劫罪一审刑事判决书-核对					0	（2014）同刑初字第712号	3	林某	1994-11-08	完全刑事责任能力	1	20															2014-12-03		其他存在明确被害人的纠纷						周双古				福建大易律师事务所		0	0	0				1
00786_黄兵犯强奸、敲诈勒索罪一审刑事判决书-核对					0	（2018）湘3127刑初9号	1	黄兵	1982-11-01	完全刑事责任能力	1	36			汉族						湖南省永顺县			中国	小学	2017-05-10	2018-01-15	拘留 逮捕	其他存在明确被害人的纠纷						彭方略				湖南三页律师事务所		0	0	0
00787_肖硕奎等13人非法拘禁等罪一审刑事判决书					0	（2017）湘1382刑初544号	13	肖硕奎							汉族			务农		务农					初中	2017-02-18	2017-11-02	逮捕 拘留	其他存在明确被害人的纠纷						葛蔓红	刘峰			湖南湘和律师事务所	湖南宇能律师事务所	0	0	0
00788_陈某危险驾驶罪一审刑事判决书-核对					0	（2014）新刑初字第212号	1	陈某	1975-11-21	完全刑事责任能力	1	39			汉族			无业		无业					普通高级中学		2014-05-07	取保候审	其他存在明确被害人的纠纷												0	0	0				1
00789_龚卫东贩卖毒品罪一审刑事判决书-核对		简易			0	（2016）渝0103刑初1538号	1	龚卫东	1965-12-01	完全刑事责任能力	1	51			汉族			无业		无业		重庆市沙坪坝区	重庆市沙坪坝区		初中	2016-09-19	2016-10-17	拘留 逮捕	不存在明确被害人的纠纷												0	0	0
00790_刘某某挪用资金一审刑事判决书-核对		普通			0	（2015）鄂东西湖刑初字第00458号	1	刘某某										其他		有限公司法定代表人、董事长						2015-11-09	2015-10-29	取保候审 逮捕	其他存在明确被害人的纠纷						马小兵				北京盈科（武汉）律师事务所		0	0	0
00792_附带民事公益诉讼被告闵圣泉一审刑事判决书-核对		普通			0	（2018）苏1203刑初73号	1	闵圣泉	1957-09-16	完全刑事责任能力	1	61			汉族			其他		个体经营			泰州市高港区		小学		2018-06-04		不存在明确被害人的纠纷												0	0	0
00793_毛迪荣故意杀人罪，俞乐、徐海挺等聚众斗殴罪等一审刑事判决书					0	（2014）浙舟刑初字第10号	13	毛迪荣					1	1			0	其他		个体			岱山县			2013-07-12	2014-05-12	逮捕 拘留	其他存在明确被害人的纠纷						王焦山				浙江蓬星律师事务所		0	0	0
00794_李某交通肇事罪一审刑事判决书-核对					0	（2016）鄂1083刑初239号	1	李某										务农		务农						2016-12-02	2016-12-02	取保候审 逮捕 取保候审	其他存在明确被害人的纠纷												0	0	1					1
00795_许超走私、贩卖、运输、制造毒品一审刑事判决书-核对		简易			0	（2016）鄂0192刑初586号	1	许超	1988-12-13	完全刑事责任能力	1	28			汉族			无业		无业		湖北省武汉市	武汉市东湖新技术开发区		初中	2016-09-21	2016-12-16	拘留 逮捕	不存在明确被害人的纠纷												0	0	0				1
00796_刘某、王某等聚众斗殴罪一审刑事判决书-核对		普通			0	（2017）苏0311刑初523号	17	刘某	1987-07-31	完全刑事责任能力	1	31			汉族			其他		有限公司区域负责人	四川省内江市市中区		四川省成都市武侯区	中国	高等专科学校	2017-06-09	2017-12-21	逮捕 拘留	其他存在明确被害人的纠纷						孙汝辉	马瑜鸿			江苏金合律师事务所	江苏金合律师事务所	0	0	0
00797_王某犯诈骗罪一审刑事判决书-核对					0	（2015）泰海刑初字第180号	1	王某																		2015-09-11	2015-06-25	拘留 取保候审 逮捕	其他存在明确被害人的纠纷						缪江云				江苏海信律师事务所		0	0	0				0
00798_毛运波、王金涛等故意伤害一审刑事判决书-核对					0	（2013）沪二中刑初字第78号	3	毛运波																					其他存在明确被害人的纠纷						叶竹影		1		上海市华夏律师事务所		0	0	0
00799_刘新志、赵某甲等犯聚众斗殴罪陆应美、温某等犯聚众斗殴罪、赌博罪杨晓翔、方军等犯聚众斗殴罪、寻衅滋事罪胡朝建、杨某乙犯赌博罪宋某犯寻衅滋事罪刘某甲犯窝藏、包庇罪一审刑事判决书		普通			0	（2013）杭余刑初字第1173号	26	刘某乙					1	1			0									2013-07-20	2013-10-28	逮捕 拘留	其他存在明确被害人的纠纷						严丽华				浙江格至律师事务所		0	0	0
00800_王某某信用卡诈骗一审刑事判决书-核对					0	（2019）津0103刑初203号	1	王某某	1984-04-26	完全刑事责任能力	1	35			汉族			无业		无业	天津市南开区	天津市	天津市北辰区	中国	中专（包括职业高中，中等专业学校，技工学校）		2019-04-08	拘留 取保候审	其他存在明确被害人的纠纷						杨顺国				天津万钧律师事务所		0	0	0
00801_吴某某犯非法持有枪支、弹药罪一案刑事判决书-核对			1		0	（2011）深中法刑一终字第592号	1	吴某某			1																		不存在明确被害人的纠纷						马某平						0	0	0		1	0	1	1
00802_药珠犯非法持有枪支罪二审刑事判决书-核对			1		0	（2017）川33刑终7号	1	药珠	1976-03-08	完全刑事责任能力	1	41														2016-12-28		拘留 逮捕	不存在明确被害人的纠纷												0	0	0		1	0
00803_董某某交通肇事案一审刑事判决书-核对					0	（2015）后刑初字第237号	1	董某某	1972-05-24	完全刑事责任能力	1	43			汉族			务农		务农					初中		2015-11-12	取保候审	家庭纠纷												0	0	0
00804_万建云信用卡诈骗一审刑事判决书-核对					0	（2015）南刑初字第338号	1	万某某	1978-10-16	完全刑事责任能力	1	37										江西省南昌县				2015-07-28	2015-07-28	拘留 取保候审 逮捕	其他存在明确被害人的纠纷						万里鹏	叶苏			江西红阳光律师事务所	江西红阳光律师事务所	0	0	0
00805_陈吉合同诈骗罪一审刑事判决书-核对		简易			0	（2014）东刑初字第01140号	1	陈吉	1984-01-20	完全刑事责任能力	1	30	1	1			0									2014-08-01	2014-10-21	逮捕	其他存在明确被害人的纠纷												0	0	0				1
00806_乔耀丽非法吸收公众存款二审刑事判决书-核对					0	（2017）豫16刑终348号	1	乔耀丽	1964-03-18	完全刑事责任能力	0	53			汉族								周口市川汇区		高等专科学校	2015-11-17		拘留 逮捕	其他存在明确被害人的纠纷						彭琛				河南卓源律师事务所		0	0	0		1	0	1
00807_朱某申某李某邹某盗窃罪一审刑事判决书-核对		普通			0	（2017）粤0306刑初1827号	4	朱某	1987-12-05	完全刑事责任能力	1	30	0	0	汉族			其他		集团员工	安徽省安庆市怀宁县		怀宁县	中国	中专（包括职业高中，中等专业学校，技工学校）	2016-12-23		拘留 逮捕	其他存在明确被害人的纠纷												0	0	0				1	1
00808_温永泉故意伤害一审刑事判决书-核对					0	（2016）冀0404刑初68号	1	温永泉	1983-07-14	完全刑事责任能力	1	33			汉族			无业		无业		河北省武安市	武安市		初中	2016-03-23		拘留 逮捕	其他存在明确被害人的纠纷												0	0	1
00809_戴虹诈骗罪，戴虹非法经营罪一审刑事判决书-核对					0	（2013）崇刑二初字第163号	1	戴虹										其他		有限公司股东						2012-12-13	2013-08-09	拘留 监视居住 逮捕	其他存在明确被害人的纠纷						宋炜				江苏神阙律师事务所		0	0	0
00810_张玉坤、郑军民开设赌场一审刑事判决书-核对		普通			0	（2017）皖1204刑初62号	2	张玉坤	1961-03-20	完全刑事责任能力	1	56			汉族			无业		无业		安徽省阜南县	阜阳市颍州区		初中		2017-03-01	取保候审	不存在明确被害人的纠纷												0	0	0
00811_李有福合同诈骗一审刑事判决书-核对					0	（2016）豫0581刑初122号	1	李有福	1965-10-17	完全刑事责任能力	1	51			汉族						山西省太原市杏花岭区	河南省林州市	山西省太原市	中国	初中	2015-07-31	2016-03-29	拘留 取保候审 拘留 逮捕	其他存在明确被害人的纠纷						任合生	路铠铭			河南新天河律师事务所	河南新天河律师事务所	0	0	0
00812_陈国轮贩卖毒品罪一审刑事判决书-核对		简易			0	（2017）渝0103刑初702号	1	陈国轮	1964-10-25	完全刑事责任能力	1	53		1	汉族			无业		无业			重庆市渝中区		初中	2017-05-12	2017-06-12	拘留 逮捕	不存在明确被害人的纠纷												0	0	0
00813_二审刑事判决书-核对				1	0	（2016）鲁08刑终35号	2	张某										务农		务农						2015-01-29		拘留 逮捕	不存在明确被害人的纠纷												0	0	0		0	1	1
00814_周某职务侵占一审刑事判决书-核对		简易			0	（2018）沪0113刑初668号	1	周某	1981-09-16	完全刑事责任能力	1	37			汉族			其他		后勤			上海市嘉定区				2018-04-13		其他存在明确被害人的纠纷						杨新峰				上海英恒律师事务所		0	0	0
00815_刘军交通肇事一审刑事判决书-核对					0	（2017）津0118刑初348号	1	刘军	1973-12-15	完全刑事责任能力	1	44			汉族			务农		务农	安徽省阜阳市颍东区	安徽省阜阳市	天津市滨海新区	中国	小学	2016-12-16	2017-05-15	拘留 逮捕	其他存在明确被害人的纠纷						陈庆南	戴玮玮			天津惟孜律师事务所	天津惟孜律师事务所	0	0	0
00816_张某甲、倪某等赌博罪一审刑事判决书					0	（2013）嘉善刑初字第269号	8	张某甲																		2012-12-21	2013-04-03	逮捕 拘留	不存在明确被害人的纠纷						万灵龙						0	0	0
00817_胡峰、李某某合同诈骗、诈骗、非法制造、买卖、运输、邮寄、储存枪支、弹药、爆炸物、非法持有、私藏枪支、弹药一审刑事判决书-核对					0	（2018）冀0121刑初20号	4	胡峰	1974-09-13	完全刑事责任能力	1	44			汉族						河北省石家庄市新乐市		石家庄市正定县	中国	初中	2017-07-28	2018-03-21	拘留 监视居住 拘留 逮捕	其他存在明确被害人的纠纷 不存在明确被害人的纠纷						杜杰锋				河北百创律师事务所		0	0	0				1	1
00818_李某文盗窃、非法持有、私藏枪支、弹药一审刑事判决书-核对		普通			0	（2017）赣0922刑初110号	1	李某文	1982-12-23	完全刑事责任能力	1	35			汉族			务农		务农	万载县		万载县	中国	中专（包括职业高中，中等专业学校，技工学校）	2017-02-11	2017-06-09	拘留 逮捕	其他存在明确被害人的纠纷 不存在明确被害人的纠纷												0	0	0
00819_司某某受贿罪一审刑事判决书-核对		简易			0	（2019）皖0802刑初120号	1	司某某	1976-11-03	完全刑事责任能力	1	43			汉族			无业		教导员	安徽省宿松县		安徽省宿松县	中国	高等专科学校	2019-08-01	2019-09-02	拘留 逮捕	不存在明确被害人的纠纷						黄松林				安徽皖松律师事务所		1	0	0				1		1
00820_罗毅强奸罪一审刑事判决书-核对		简易			0	（2018）川1129刑初19号	1	罗毅			1		1	1	汉族		0	务农		务农			沐川县		小学	2018-01-09	2018-04-03	拘留 逮捕	其他存在明确被害人的纠纷												0	0	0
00821_梁忭走私、贩卖、运输、制造毒品罪一审刑事判决书-核对		简易			0	（2019）浙1181刑初17号	1	梁忭	1997-10-17	完全刑事责任能力	0	22	1	1	壮族		0				广西壮族自治区南宁市邕宁区	广西壮族自治区南宁市邕宁区	湖南省长沙市雨花区	中国	初中	2018-12-05	2019-02-01	拘留 逮捕	不存在明确被害人的纠纷												0	0	0				1		1
00822_桑某甲犯非法私藏枪支、弹药罪一审刑事判决书-核对					0	（2010）阿刑初字第03号	1	桑某甲			1																2010-01-21	拘留 取保候审	不存在明确被害人的纠纷												0	0	0					1
00823_李新林贪污、受贿一审刑事判决书-核对		普通			0	（2019）赣0302刑初324号	1	李新林	1978-04-20	完全刑事责任能力	1	41			汉族			其他		监察大队大队长	江西省上栗县	江西省	萍乡	中国	高等专科学校	2019-06-21		拘留 逮捕	不存在明确被害人的纠纷						姚喻				江西赣天律师事务所		1	0	0
00824_（2016）289张某1寻衅滋事案一审刑事判决书-核对					0	（2016）辽0211刑初289号	1	张某1			1															2015-11-20	2016-04-13	拘留 逮捕	其他存在明确被害人的纠纷						康波				辽宁杰仕孚律师事务所		0	0	0				1
00825_刘某强奸二审刑事判决书-核对			1		0	（2014）酒刑一终字第89号	1	刘某	1989-12-13	完全刑事责任能力	1	25			汉族			其他		个体工商户					普通高级中学	2014-07-16		拘留 逮捕	其他存在明确被害人的纠纷						崔刚				甘肃政剑律师事务所		0	0	0		1	0
00826_被告人张波非法携带枪支危及公共安全罪一案刑事判决书					0	（2013）临刑初字第78号	1	张某					1	1			0										2013-09-06		其他存在明确被害人的纠纷												0	0	0
00827_孔凡安走私、贩卖、运输、制造毒品一审刑事判决书		速裁转普通			0	（2018）浙0104刑初98号	1	孔凡安	1975-01-01	完全刑事责任能力	1	43	1	1	汉族		0				浙江省杭州市萧山区	浙江省杭州市		中国	初中	2017-11-23	2018-01-23	拘留 逮捕	不存在明确被害人的纠纷						吕健		1		浙江九恒律师事务所		0	0	0				1
00828_沈丹、张作林组织、领导传销活动二审刑事判决书			1		0	（2017）浙01刑终463号	2	沈丹	1989-09-09	完全刑事责任能力	0	28			汉族			无业		无业	宁都县			中国	高等专科学校	2016-04-15		拘留 逮捕	不存在明确被害人的纠纷						温辉	何雪连			江西创兴律师事务所	江西创兴律师事务所	0	0	0		0	1
00829_杨仕清走私、贩卖、运输、制造毒品、非法持有、私藏枪支、弹药一审刑事判决书					0	（2017）粤52刑初47号	1	杨仕清	1979-08-03	完全刑事责任能力	1	38			汉族						广东省惠来县		惠来县	中国	小学	2016-12-15	2017-06-26	拘留 逮捕	不存在明确被害人的纠纷						黄洌丰		1		广东泰源律师事务所		0	0	0				0	0
00830_曲太忠等非法制造、买卖、运输、邮寄、储存枪支、弹药、爆炸物罪一审刑事判决书		简易转普通			0	（2014）顺刑初字第234号	2	杨友立	1979-11-14	完全刑事责任能力	1	35														2013-12-05	2014-03-06	拘留 逮捕	不存在明确被害人的纠纷						刘卫东				北京市冠衡律师事务所		0	0	0
00831_诉刘娇非法吸收公众存款罪一案一审刑事判决书					0	（2018）沪01刑初45号	1	刘娇	1982-05-28	完全刑事责任能力	1	36			汉族			其他		区域顾问	辽宁省抚顺市东洲区	辽宁省抚顺市	辽宁省抚顺市	中国	大学本科	2018-02-13	2018-05-14	拘留 逮捕	不存在明确被害人的纠纷						聂斌	郑欣欣			辽宁行仁律师事务所	辽宁行仁律师事务所	0	0	0
00832_雷加伟、高俊伟贪污一审刑事判决书					0	（2014）绥中法刑二初字第9号	2	雷加伟																				拘留 逮捕	不存在明确被害人的纠纷						马继东				黑龙江继东律师事务所		0	0	0				1	1
00833_郭某明、李某诈骗一审刑事判决书					0	刑事判决书 （2015）东刑初字第29号	2	郭某明					1	1				无业		无业						2014-12-23	2015-05-11	拘留 逮捕	其他存在明确被害人的纠纷						黄国生				广西兰盛律师事务所		0	0	0
00834_邵英俊、陶恩波敲诈勒索罪一审刑事判决书					0	（2018）浙1002刑初751号	2	邵英俊	1988-04-01	完全刑事责任能力	1	30			汉族			其他		经商	台州市椒江区	浙江省台州市	台州市椒江区	中国	中专（包括职业高中，中等专业学校，技工学校）	2018-04-28		拘留 逮捕	其他存在明确被害人的纠纷						李达淼				浙江海贸律师事务所		0	0	0				1
00835_李永刚一审刑事判决书-核对		简易			0	（2018）粤0303刑初796号	1	李永刚	1986-11-27	完全刑事责任能力	1	32	1	1	汉族						广东省深圳市龙岗区			中国	中专（包括职业高中，中等专业学校，技工学校）	2018-01-26		拘留 逮捕	不存在明确被害人的纠纷						张正友				广东诚公律师事务所		0	0	0
00836_李东楷等13人走私武器、弹药等一案刑事判决书			1		0	（2013）桂刑经终字第20号	13	李东楷	1978-10-07	完全刑事责任能力	1	36			汉族			其他		个体户		浙江省东阳市			大学本科	2012-06-15		逮捕 拘留	不存在明确被害人的纠纷						赵春林	吕海聂			广西秋合律师事务所	广西创想律师事务所	0	0	0		1	0
00837_向某故意伤害罪一审刑事判决书-核对		普通			0	（2017）苏0582刑初734号	1	向某	1964-01-09	完全刑事责任能力	1	53		1	汉族			无业		无业		江苏省张家港市	张家港市		初中	2017-08-11	2017-06-28	取保候审 逮捕	其他存在明确被害人的纠纷						张振荣		1		江苏润众律师事务所		0	0	0				0	0
00838_孙诗圣强奸罪一审刑事判决书-核对		简易			0	（2018）川1025刑初334号	1	孙诗圣	1997-02-12	完全刑事责任能力	1	21			汉族			务农		务农		四川省资中县	四川省资中县		初中	2018-09-25	2018-10-25	拘留 逮捕	其他存在明确被害人的纠纷												0	0	0
00839_赵金孟、董志黎非法制造、买卖、运输、邮寄、储存枪支、弹药、爆炸物一审刑事判决书					0	（2017）粤0115刑初476号	6	赵金孟	1992-11-08	完全刑事责任能力	1	26			汉族			其他		公司职员	河北省廊坊市	河北省廊坊市	河北省廊坊市广阳区	中国	中专（包括职业高中，中等专业学校，技工学校）	2017-06-23	2017-08-22	拘留 逮捕	不存在明确被害人的纠纷						黄夏文				广东百健律师事务所		0	0	0
00840_张某富、张某忠贪污二审刑事判决书			1	1	0	（2018）豫07刑终360号	2	张某富	1956-09-05	完全刑事责任能力	1	62			汉族			其他		供销社主任			新乡市		普通高级中学	2015-11-10		拘留 逮捕 取保候审	其他存在明确被害人的纠纷						吴红亮				贵州宏强律师事务所		0	0	0		1	0
00841_段某甲非法制造、买卖、运输、邮寄、储存枪支、弹药、爆炸物罪一审刑事判决书					0	（2016）新2324刑初136号	1	段某甲	1964-01-05	完全刑事责任能力	1	52			汉族			务农		务农		甘肃省武威市			初中	2016-11-15	2016-09-01	拘留 取保候审 逮捕	不存在明确被害人的纠纷												0	0	0
00842_林某通、谢某坤非法制造、买卖、运输、邮寄、储存枪支、弹药、爆炸物一审刑事判决书					0	（2017）粤03刑初739号	3	林某通			1		1	1			0									2017-06-22	2017-09-01	拘留 逮捕	不存在明确被害人的纠纷						邱某丰				广东xx律师事务所		0	0	0				1		1
00843_侯希安故意杀人一审刑事判决书					0	（2018）京01刑初91号	1	侯希安	1963-03-21	完全刑事责任能力	1	55			汉族			务农		务农	山东省滨州市沾化县	山东省沾化县		中国	初中	2018-10-01	2018-08-15	逮捕	家庭纠纷						赵阿媛	孙晓洋	1	1	北京市鑫泰洋律师事务所	北京市鑫泰洋律师事务所	0	0	0
00844_刘某、甄某非法制造、买卖、运输、邮寄、储存枪支、弹药、爆炸物一审刑事判决书－核对		普通			0	（2014）佛城法刑初字第953号	2	刘某			1				汉族			其他		个体			广东省广州市越秀区		普通高级中学	2014-09-10	2014-12-04	拘留 逮捕	不存在明确被害人的纠纷			1	0		周玉忠	潘卫平	0	0	北京市盈科（广州）律师事务所	北京市盈科（广州）律师事务所	0	0	0
00845_张雄、张成走私、贩卖、运输、制造毒品、非法制造、买卖、运输、邮寄、储存枪支、弹药、爆炸物、非法持有、私藏枪支、弹药一审刑事判决书－核对					0	（2014）鄂武汉中刑初字第00148号-1	3	张雄										无业		无业						2013-12-25	2014-09-05	拘留 逮捕	不存在明确被害人的纠纷						曾轩		0		湖北德伟君尚律师事务所		0	0	0
00846_杨丽华、王明杰职务侵占一审刑事判决书－核对					0	（2014）宝刑初字第381号	2	杨丽华																			2014-02-27		其他存在明确被害人的纠纷						瞿楠		0		上海市亚太长城律师事务所		0	0	0
00848_孙振雨盗窃一审刑事判决书-核对		简易			0	（2018）沪0101刑初974号	1	孙振雨	1992-12-08	完全刑事责任能力	1	26			汉族														其他存在明确被害人的纠纷						蔡茸茸	王家斌			上海市李国机律师事务所	上海市李国机律师事务所	0	0	0
00849_被告人曹某某盗窃一案一审刑事判决书-核对					0	（2016）豫1702刑初435号	1	曹某某	1970-12-07	完全刑事责任能力	0	46		1				无业		无业			驻马店市驿城区		初中	2016-06-08	2016-08-12	拘留 逮捕	其他存在明确被害人的纠纷												0	0	0				1
00850_陈某某非法持有、私藏枪支、弹药一审刑事判决书－核对					0	（2017）闽0181刑初291号	1	陈某某	1975-07-29	完全刑事责任能力	1	42			汉族	0		无业	0	无业			福建省福州市福清市		初中	2016-12-28	2017-02-16	拘留 逮捕	不存在明确被害人的纠纷						周伟督		0		福建建联律师事务所		0	0	0
00851_郑少川犯组织卖淫罪一审刑事判决书－核对					0	（2014）长刑初字第558号	1	郑少川	1978-05-21	完全刑事责任能力	1	36			汉族	0		其他	0	经商		福建省长乐市	长乐市		小学	2014-01-27	2014-09-30	拘留 逮捕	不存在明确被害人的纠纷						游金德		0		福建闽航律师事务所		0	0	0
00852_何金城、李金华走私、贩卖、运输、制造毒品一审刑事判决书－核对			1		0	（2017）粤19刑初258号	2	何金城	1979-03-28	完全刑事责任能力	1	38			汉族	0			0		四川省南部县			中国	普通高级中学	2014-11-17		拘留 逮捕	不存在明确被害人的纠纷												0	0	0	1
00853_邹时旺非法制造、买卖、运输、邮寄、储存枪支、弹药、爆炸物、非法持有、私藏枪支、弹药一审刑事判决书－核对					0	（2018）粤1972刑初770号	1	邹时旺																		2017-08-29	2018-04-03	拘留 逮捕	不存在明确被害人的纠纷						李新宜	邹忠庆	0	0	广东臻善律师事务所	广东臻善律师事务所	0	0	0
00854_徐州市云龙区人民检察院诉被告人刘某某非法制造、买卖、运输、邮寄、储存枪支、弹药、爆炸物罪一审刑事判决书－核对					0	（2018）苏0303刑初360号	1	刘某某			1				汉族			无业		无业			山东省烟台市栖霞市		中专（包括职业高中，中等专业学校，技工学校）	2018-08-07	2018-07-16	拘留 取保候审 逮捕	不存在明确被害人的纠纷			1	0		林维钢	卢方舟	0	0	浙江泽大律师事务所	浙江泽大律师事务所	0	0	0				1	1
00855_林某某非法制造、买卖、运输、邮寄、储存枪支、弹药、爆炸物二审刑事判决书－核对			1	0	0	（2016）粤15刑终71号	1	林某某	1976-01-20	完全刑事责任能力	1	40			汉族	0		无业	0	无业	广东省陆丰市		广东省陆丰市	中国	小学	2015-09-30		拘留 逮捕	不存在明确被害人的纠纷												0	0	0		1	1	1
00856_丁振坤非法持有枪支案一审刑事判决书-核对					0	（2014）渝刑初字第00292号	1	丁振坤	1971-05-24	完全刑事责任能力	1	43	1	1												2014-07-18	2014-09-19	拘留 逮捕	不存在明确被害人的纠纷						刘国华				江西至开律师事务所		0	0	0				1
00857_刘志兴故意伤害一审刑事判决书					0	（2017）津0114刑初631号	1	刘志兴	1980-03-05	完全刑事责任能力	1	37	0	0	汉族	0		务农	0	务农		天津市武清区	天津市武清区		初中	2017-08-17	2017-09-28	拘留 逮捕	其他存在明确被害人的纠纷						孙玉伟		0		天津法政牛津（北京）律师事务所		0	0	1
00858_霍昶亨一审刑事判决书		简易			0	（2018）京0105刑初512号	1	霍昶亨	1986-09-20	完全刑事责任能力	1	32			汉族	0		无业	0	无业		甘肃省天水市			初中	2017-11-22	2018-02-26	拘留 逮捕	不存在明确被害人的纠纷												0	0	0				1
00859_蔡辉豪、柯发新、沈文概等寻衅滋事罪一审刑事判决书		普通			0	（2018）闽0583刑初1886号	4	蔡辉豪	1995-05-26	完全刑事责任能力	1	23			汉族	0		务工	0	务工		福建省南安市	南安市		初中	2018-05-17	2018-12-17	拘留 逮捕							张桦木	陈华欣	0	0	建泉南律师事务所	福建泉南律师事务所	0	0	0
00860_郭世利危险驾驶罪一审刑事判决书-核对		简易			0	（2018）浙0502刑初169号	1	郭世利	1976-03-16	完全刑事责任能力	1	42			汉族						山东省潍坊市		山东省潍坊市奎文区	中国	硕士研究生		2018-02-23	取保候审	不存在明确被害人的纠纷												0	0	0				1
00861_李立军走私、贩卖、运输、制造毒品一审刑事判决书-核对		普通			0	（2019）津0116刑初60014号	1	李立军	1968-12-05	完全刑事责任能力	1	51			汉族			其他		公司项目经理	辽宁省抚顺市东洲区		天津市滨海新区	中国	初中	2018-06-27	2019-01-07	拘留 逮捕	不存在明确被害人的纠纷						王剑冰				天津勤达律师事务所		0	0	0				1		1
00862_西合白故意杀人、非法持有枪支一审刑事判决书					0	（2017）川32刑初5号	1	西合白	1959-06-11	完全刑事责任能力	1	58			藏族	0			0		甘肃省甘南藏族自治州玛曲县		甘肃省甘南藏族自治州玛曲县	中国	文盲	2016-10-12	2017-03-22	逮捕	其他存在明确被害人的纠纷						俄热	毕树泉	0	0	四川岷源律师事务所	四川维州律师事务所	0	0	0
00863_(2017)吉0303刑初11号被告人王某甲抢夺罪一审刑事判决书					0	（2017）吉0303刑初11号	1	王某甲					0	0							吉林省四平市		四平市	中国		2016-11-29	2017-01-11	拘留 逮捕	其他存在明确被害人的纠纷						王桂玥		0		吉林公捷律师事务所		0	0	0				1	1
00864_李成福强奸罪一审刑事判决书		普通			0	（2015）深宝法刑初字第2262号	1	李某													云南省红河哈尼族彝族自治州绿春县			中国		2015-02-13	2015-06-06	拘留 逮捕	其他存在明确被害人的纠纷						王振华		0		律师事务所		0	0	0
00865_姚春萍、张荣、谭光文贪污罪一审刑事判决书			1		0	（2017）桂09刑初47号	3	张荣	1960-11-04	完全刑事责任能力	1	57			汉族	0		其他	0	公司经理，公司改制领导小组组长		广西壮族自治区贵港市	陆川县		大学本科	2014-05-16		拘留 逮捕	其他存在明确被害人的纠纷						赵海平		0		广西绮鸣律师事务所		0	0	0	1
00866_陈某某非法制造枪支案二审刑事判决书			1		0	（2016）云23刑终64号	1	陈某某	1970-06-21	完全刑事责任能力	1	46	0	1		0			0				云南省楚雄市			2015-11-11		拘留 逮捕	不存在明确被害人的纠纷												0	0	0		1	0
00867_被告人张海洋合同诈骗一案刑事判决书					0	（2014）海南一中刑初字第41号	2	三亚博越实业有限公司																			2014-04-22		其他存在明确被害人的纠纷						陶虹		0		海南惠海律师事务所		0	0	0
00868_赵某甲、王某、李某甲、赵某乙徇私枉法罪、马某滥用职权罪一审刑事判决书	1				0	（2014）相刑初字第00190号	5	赵某甲	1974-06-19	完全刑事责任能力	1	40			汉族	0			0			安徽省濉溪县	安徽省淮北市相山区			2014-01-09	2014-04-22	拘留 逮捕	不存在明确被害人的纠纷						赵玉宏	赵志恒	0	0	安徽北方之光律师事务所	安徽北方之光律师事务所	0	0	0
00869_默罕默德·萨克里走私珍贵动物、珍贵动物制品一审刑事判决书			1		0	（2017）粤01刑初38号	1	默罕默德·萨克里（MOHAMEDSHOKRYEBRAHIMKHALIL）	1975-12-20	完全刑事责任能力	1	42				0			0				埃及	阿拉伯埃及共和国		2015-12-04	2016-07-05	拘留 逮捕	不存在明确被害人的纠纷			1	1		徐军		0		广东金桥百信律师事务所		0	0	0	1
00870_金益华引诱、容留、介绍卖淫罪一审刑事判决书					0	（2013）甬北刑初字第180号	1	金益华																		2012-12-11	2013-05-02	拘留 逮捕	不存在明确被害人的纠纷			1	0		徐德林		0		浙江金汉律师事务所		0	0	0
00871_陈兵峰强奸罪一审刑事判决书-核对					0	（2017）浙0902刑初369号	1	陈兵峰	1986-12-01	完全刑事责任能力	1	31			汉族			其他		其他		浙江省舟山市	舟山市定海区		初中	2017-11-22	2017-10-23	拘留 取保候审 逮捕	其他存在明确被害人的纠纷												0	0	0
00872_林某非法制造、买卖、运输、邮寄、储存枪支、弹药、爆炸物一审刑事判决书-核对					0	（2016）粤1581刑初6号	1	林某			1				汉族			无业		无业	广东省陆丰市		广东省陆丰市	中国	小学	2015-09-30	2015-12-11	拘留 逮捕	不存在明确被害人的纠纷												0	0	0				1
00873_李随心走私、贩卖、运输、制造毒品一审刑事判决书-核对					0	（2015）孟刑初字第00085号	1	李随心	1967-12-11	完全刑事责任能力	1	48			汉族			务农		务农						2014-12-12	2015-03-25	拘留 逮捕	不存在明确被害人的纠纷												0	0	0
00874_临洮县人民检察院诉佟财峰李岩王国栋王建忠非法制造、买卖、邮寄枪支罪非法制造、买卖枪支罪非法制造、储存枪支罪一审刑事判决书	1				0	（2018）甘1124刑初203号	4	佟某	1981-09-10	完全刑事责任能力	1	37			满族	0			0			吉林省长春市南关区	吉林省长春市朝阳区		高等专科学校	2017-11-28	2018/6/12#2019/2/27	拘留 逮捕	不存在明确被害人的纠纷			1	1		海世杰		0		临夏宁定律师事务所		0	0	0
00875_匡某犯放火罪一审刑事判决书-核对					0	（2015）温龙刑初字第705号	1	匡某					0	0				务工		务工						2015-07-09	2015-08-28	拘留 逮捕	其他存在明确被害人的纠纷						陈根凤		1		浙江联英律师事务所		0	0	0
00876_何泽非法持有、私藏枪支、弹药刑事判决书-核对		简易转普通			0	（2016）渝0111刑初418号	1	何泽	1986-02-21	完全刑事责任能力	1	30			汉族			无业		无业	重庆市大足区		重庆市大足区	中国	小学	2016-04-30	2016-10-10	拘留 逮捕	不存在明确被害人的纠纷						马军	李敬邻			重庆杰义律师事务所	重庆杰义律师事务所	0	0	0
00877_被告人周某某贩卖毒品案一审刑事判决书-核对		简易			0	（2014）金刑初字第1075号	1	周某某			0																2014-10-29		不存在明确被害人的纠纷												0	0	0
00878_田念盗窃罪一审刑事判决书-核对		简易转普通			0	（2014）嘉善刑初字第195号	1	田念					1	1													2014-02-20		其他存在明确被害人的纠纷						汤尚义						0	0	0
00879_吴斌非国家工作人员受贿一审刑事判决书					0	（2018）湘0103刑初30号	1	吴斌	1981-02-27	完全刑事责任能力	1	37	0	0	汉族	0		其他	0	其他	长沙市天心区		长沙市天心区	中国	大学本科	2017-06-27	2018-01-16	拘留 逮捕	不存在明确被害人的纠纷						何焱		0		湖南银联律师事务所		0	0	0
00880_谢帮金挪用公款一审刑事判决书					0	（2013）合刑初字第35号	1	谢帮金	1955-11-05	完全刑事责任能力	1	58			汉族	0		其他	0	其他	甘肃省合水县		合水县	中国	文盲	2013-03-30	2013-05-21	拘留 逮捕													0	0	0				1
00881_廖明光一审刑事判决书		简易			0	（2018）鄂0102刑初1381号	1	廖明光					1	1			0	无业		无业						2018-09-20	2018-11-14	拘留 逮捕							辩护人	陈静	0	0	湖北佳元律师事务所	湖北佳元律师事务所	0	0	0				1
00882_屈俊山妨害公务罪一审刑事判决书					0	（2017）皖1203刑初136号	1	屈俊山	1966-09-13	完全刑事责任能力	1	51			汉族	0		其他	0	其他		安徽省阜阳市	安徽省阜阳市颍东区		初中	2017-09-18	2017-06-13	拘留 取保候审 监视居住 逮捕	其他存在明确被害人的纠纷			1	0		王国	许令军	0	0	安徽松鼎律师事务所	安徽松鼎律师事务所	0	0	1
00883_谢杨迁非法持有私藏枪支、弹药案一审刑事判决书					0	（2015）乌刑初字第559号	1	谢杨迁	1985-07-02	完全刑事责任能力	1	30			汉族	0		无业	0	无业	广东省湛江市雷州市		广东省广州市白云区	中国	普通高级中学	2015-04-29	2015-12-23	拘留 逮捕	不存在明确被害人的纠纷			1	0		彭文忠	李洪晶	0	0	广东粤正律师事务所	内蒙古矩成律师事务所	0	0	0
00884_吕某 失火罪一审刑事判决书					0	（2014）东刑一初字第700号	1	吕某	1957-07-25	完全刑事责任能力	1	57			汉族	0		务农	0	务农		内蒙古自治区			小学		2014-11-17	取保候审	其他存在明确被害人的纠纷												0	0	0
00885_杨绪方盗窃一审刑事判决书					0	（2018）粤1972刑初1320号	1	杨绪方					1	1			0									2018-04-12	2018-06-21	拘留 逮捕	其他存在明确被害人的纠纷						黄良洪		1		广东海联泰达律师事务所		0	0	0				1
00887_涂忠秋、周广元非法制造、买卖、运输、邮寄、储存枪支、弹药、爆炸物二审刑事判决书			1		0	（2018）粤19刑终418号	5	涂忠秋	1995-08-18	完全刑事责任能力	1	23	0	1	汉族	0		无业	0	无业	云南省屏边苗族自治县		屏边苗族自治县	中国	初中	2017-06-09		拘留 逮捕	不存在明确被害人的纠纷						梁嘉茵		0		北京市惠诚（东莞）律师事务所		0	0	0		1	1
00888_刘浩诈骗罪一审刑事判决书		普通			0	（2015）深福法刑初字第1664号	1	刘某	1984-08-10	完全刑事责任能力	1	31	0	1	汉族	0		其他	0	有限公司员工	广东省梅州市兴宁市		深圳市罗湖区	中国	中专（包括职业高中，中等专业学校，技工学校）	2015-08-28	2015-10-22	拘留 逮捕	其他存在明确被害人的纠纷												0	0	0
00889_蒲泰宏犯非法持有枪支罪一审刑事判决书					0	（2015）船山刑初字第275号	1	蒲泰宏		完全刑事责任能力	1	41				0			0							2015-04-10	2015-06-10	拘留 取保候审 拘留 逮捕							张翼	伍刚	0	0	四川斗城律师事务所	四川斗城律师事务所	0	0	0				1
00890_被告人韩桂月故意伤害一案刑事判决书					0	（2011）牟刑初字第403号	1	韩桂月	1966-02-14	完全刑事责任能力	0	45				0			0							2011-03-08	2011-09-13	拘留 逮捕	其他存在明确被害人的纠纷						王兆才		0		河南有道律师事务所		0	0	1				1
00891_承德市双桥区人民检察院指控被告人朱小林犯介绍卖淫罪一审刑事判决书					0	（2014）双桥刑初字第192号	1	朱小林	1970-08-06	完全刑事责任能力	1	44			汉族	0		其他	0	个体					初中	2014-01-15	2014-04-18	拘留 逮捕	不存在明确被害人的纠纷						杨静		0		河北蓝岛律师事务所		0	0	0				1	1
00892_邵某生非法制造、买卖、运输、邮寄、储存枪支、弹药、爆炸物一审刑事判决书					0	（2017）粤1882刑初241号	1	邵某生			1				汉族			务农		务农	广东省连州市		广东省连州市	中国	小学	2017-10-14	2017-12-28	拘留 逮捕	不存在明确被害人的纠纷												0	0	0				1
00893_曹某甲犯失火罪一审刑事判决书			1		0	（2017）辽1421刑初391号	1	曹某甲										务农		务农						2017-11-27		拘留 取保候审 逮捕	其他存在明确被害人的纠纷						王晓绥		0		辽宁群声律师事务所		0	0	0	1			1
00894_谢志成、刘某侵犯著作权罪一审刑事判决书					0	刑事判决书 （2014）穗天法知刑初字第4号	2	谢志成	1980-06-28	完全刑事责任能力	1	34			汉族	0			0		湖南省耒阳市			中国	初中	2013-05-24		拘留 逮捕	其他存在明确被害人的纠纷						王金水	谢高仕	0	0	广东博浩律师事务所	广东华璟律师事务所	0	0	0
00896_高峰、史俊杰抢劫罪，高峰、史俊杰等盗窃罪一审刑事判决书	1				0	（2014）南刑初字第00004号	3	高峰	1974-09-20	完全刑事责任能力	1	40			汉族	0		其他	0	驾驶员		安徽省蒙城县	安徽省合肥市庐阳区			2013-05-31		拘留 逮捕	其他存在明确被害人的纠纷						李家顺	朱皖涛	0	0	安徽会峰律师事务所	安徽会峰律师事务所	0	0	0
00897_吴某假冒注册商标罪一审刑事判决书					0	（2014）徐知刑初字第19号	1	吴某										其他		有限公司法定代表人						2013-12-21	2014-09-25	取保候审 拘留 逮捕	其他存在明确被害人的纠纷						王淑林						0	0	0				1
00898_李庆走私、贩卖、运输、制造毒品、非法制造、买卖、运输、邮寄、储存枪支、弹药、爆炸物一审刑事判决书					0	（2016）粤20刑初84号	1	李庆	1991-04-23	完全刑事责任能力	1	25	1	1	土家族	0	0	务农	0	务农	湖南省桑植县			中国	初中	2015-12-18	2016-07-15	拘留 逮捕	不存在明确被害人的纠纷						贡兴安		0		广东威格信律师事务所		0	0	0
00899_李响容留他人吸毒罪一审刑事判决书		简易			0	（2017）渝0102刑初815号	1	李响	1999-06-05	完全刑事责任能力	1	18			汉族	0			0			重庆市涪陵区	重庆市涪陵区		普通高级中学	2017-11-23	2017-11-16	拘留 取保候审 逮捕	不存在明确被害人的纠纷												0	0	0
00900_李家兴、赵明禄等犯故意伤害罪杨波犯故意伤害罪、非法拘禁罪一审刑事判决书					0	（2014）泰刑一初字第9号	5	李家兴		完全刑事责任能力	1		1	1		0	0	无业	0	无业						2013-09-13	2014-04-29	拘留 逮捕	其他存在明确被害人的纠纷						武斌	马妮	0	0	山东东岳律师事务所	山东东岳律师事务所	0	0	1
00901_王菊明、陆小弟、孙秋林犯污染环境罪一案刑事判决书		普通			0	（2017）苏0508刑初115号	3	王菊明	1963-09-25	完全刑事责任能力	1	54			汉族	0		其他	0	有限公司负责人	江苏省昆山市		江苏省昆山市	中国	小学	2016-08-11		拘留 逮捕	其他存在明确被害人的纠纷						薛能		0		江苏新天伦律师事务所		0	0	0
00902_黄文红行贿罪二审刑事判决书			1	1	0	（2016）冀02刑终474号	1	黄文红	1978-05-19	完全刑事责任能力	0	38			满族			其他		有限公司总经理	唐山市		唐山市路北区		大学本科	2014-04-23		拘留 逮捕 取保候审	不存在明确被害人的纠纷						李馈				河北仲浩律师事务所		0	0	0	1	1	0	1
00903_张保和、娄敏、钱国阳、蔡某某贪污、受贿一审刑事判决书					0	（2014）淮刑初字第00022号	4	张保和	1947-11-21	完全刑事责任能力	1	67			汉族			其他		有限公司（以下简称淮南新华书店）总经理	淮南市田家庵区	辽宁省沈阳市	淮南市	中国	高等专科学校	2014-04-12	2014-08-12	监视居住 拘留 逮捕	其他存在明确被害人的纠纷						刘文斌				安徽承义律师事务所		0	0	0
00904_张某、伞某、刘某犯盗窃罪、被告人李某犯盗窃罪、掩饰、隐瞒犯罪所得罪、妨害公务罪一审刑事判决书		普通			0	（2015）浑南刑初字第00359号	4	张某			1		1	1	汉族		0	无业		无业	吉林省榆树市	吉林省榆树市		中国	小学	2015-03-06	2015-09-17	拘留 逮捕	其他存在明确被害人的纠纷						丁继伟				辽宁高义律师事务所		0	0	0
00905_高鹏贩卖毒品一审刑事判决书		简易			0	（2016）渝0112刑初1589号	1	高鹏	1992-08-15	完全刑事责任能力	1	24			汉族			务农		务农		重庆市北碚区	重庆市北碚区		普通高级中学	2016-11-09	2016-11-23	拘留 逮捕	不存在明确被害人的纠纷												0	0	0
00906_罗某盗窃一审刑事判决书					0	（2018）鄂01刑初190号	1	罗某		完全刑事责任能力			1	1			0	无业		无业						2017-11-10	2018-07-02	逮捕 拘留	其他存在明确被害人的纠纷						唐细春		1				0	0	0
00907_谢平儿抢劫罪、盗窃罪等一审刑事判决书					0	（2016）浙03刑初10号	1	谢平儿	1975-12-18	完全刑事责任能力	1	41	0	1	汉族								湖南省湘西土家族苗族自治州泸溪县		小学	2015-02-13	2015-10-12	逮捕 拘留	其他存在明确被害人的纠纷			1	0		章魁衡				浙江越人律师事务所		0	0	0				0
00908_杨勇强奸罪一审刑事判决书					0	（2018）浙1022刑初31号	1	杨勇	1983-01-19	完全刑事责任能力	1	35			汉族			其他		劳务人员		浙江省三门县	浙江省三门县		高等专科学校	2017-11-23	2018-01-22	拘留 逮捕	其他存在明确被害人的纠纷						梅文婷				浙江持正律师事务所		0	0	0				1
00909_史勇、茹秀琴受贿罪、巨额财产来源不明罪一审刑事判决书	1				0	（2014）白中刑二初字第1号	2	史勇	1960-01-20	完全刑事责任能力	1	54			汉族			其他		局长	甘肃省酒泉市		酒泉市	中国	大学本科	2013-09-06	2014-01-03	逮捕	不存在明确被害人的纠纷						田国平				甘肃致中律师事务所		0	0	0				1
00911_杨某犯盗窃罪一审刑事判决书					0	（2015）甬慈刑初字第1083号	1	杨某										务农		务农						2015-03-30	2015-06-08	拘留 逮捕	其他存在明确被害人的纠纷						周榴君		1		浙江金穗律师事务所		0	0	0
00912_冯志鹏非法侵入住宅一审刑事判决书					0	（2017）冀0528刑初215号	1	冯志鹏	1988-11-11	完全刑事责任能力	1	29			汉族			务农		务农		河北省宁晋县	宁晋县		初中	2017-08-10	2017-11-24	拘留 逮捕	其他存在明确被害人的纠纷						郭利华				河北众平律师事务所		0	0	0
00913_被告人黄汉生、杨胜友犯盗窃罪一审刑事判决书		普通			0	（2014）晋刑初字第156号	2	黄汉生	1974-12-09	完全刑事责任能力	1				汉族			务农		务农					初中	2013-05-25	2013-12-25	逮捕 拘留	其他存在明确被害人的纠纷						王晓冬	陈志攀			福建佳汇律师事务所	福建佳汇律师事务所	0	0	0				1
00914_成秀丽走私、贩卖、运输、制造毒品罪一审刑事判决书					0	（2014）房刑初字第157号	1	成秀丽	1981-08-27	完全刑事责任能力	0	33	1	1			0									2013-11-18	2014-02-24	拘留 逮捕	不存在明确被害人的纠纷												0	0	0
00915_牛敏受贿二审刑事判决书			1		0	（2017）川刑终72号	1	牛敏	1962-11-03	完全刑事责任能力	1	55			汉族			其他		法院党组书记、院长		四川省金堂县			硕士研究生	2015-07-01		拘留 逮捕	不存在明确被害人的纠纷			1	1		唐礼全	刘迪			四川华楚律师事务所	四川华楚律师事务所	0	0	0		1	1	1	1
00916_被告人丁洪、王洪、李利双犯盗窃罪一审刑事判决书		普通			0	（2016）川0322刑初204号	3	丁洪	1995-01-26	完全刑事责任能力	1	21	0	1	汉族			务农		务农		四川省富顺县	四川省富顺县		小学	2016-03-25	2016-09-02	逮捕 拘留	其他存在明确被害人的纠纷												0	0	0				1
00917_常某某盗伐林木一审刑事判决书-核对		普通			0	（2018）黑0104刑初608号	1	常某某	1958-04-21	完全刑事责任能力	1	60			汉族			无业		无业		黑龙江省哈尔滨市	黑龙江省哈尔滨市道外区			2018-09-27	2018-11-01	拘留 逮捕	其他存在明确被害人的纠纷						周海燕				黑龙江法大律师事务所		0	0	0					1
00918_赵金龙盗窃一审刑事判决书-核对					0	（2018）浙0481刑初542号	1	赵金龙	1985-07-14	完全刑事责任能力	1	33	1	1	汉族			无业		无业		浙江省绍兴市	浙江省绍兴市上虞区		小学	2018-05-25	2018-08-09	拘留 逮捕	其他存在明确被害人的纠纷						陈丽芳				浙江海翔律师事务所		0	0	0
00919_张思为走私、贩卖、运输、制造毒品一审刑事判决书-核对		简易			0	（2017）苏0509刑初408号	1	张思为	1990-07-02	完全刑事责任能力	1	27											安徽省六安市裕安区			2017-02-09	2017-03-14	拘留 逮捕	不存在明确被害人的纠纷												0	0	0
00921_谢朝胜强奸、猥亵儿童一审刑事判决书					0	（2017）粤0203刑初147号	1	谢朝胜	1958-02-05	完全刑事责任能力	1	59	1	1	汉族		0				广东省韶关市武江区		广东省韶关市武江区		小学	2017-06-07	2017-06-29	拘留 逮捕	其他存在明确被害人的纠纷												0	0	0
00922_姜哲龙故意杀人一审刑事判决书					0	（2014）延中刑初字第8号	1	姜哲龙	1972-12-18	完全刑事责任能力	1	42	0		朝鲜族			无业		无业	吉林省珲春市		吉林省珲春市		初中	2013-10-23	2014-03-11	逮捕 拘留	其他存在明确被害人的纠纷						裴雄日		1		吉林权哲律师事务所		0	0	0
00923_刘汉国贩卖毒品罪、容留他人吸毒罪、余科贩卖毒品罪二审刑事判决书			1		0	（2018）渝刑终180号	2	刘汉国	1975-05-11	完全刑事责任能力	1	43	1	1	汉族		0	无业		无业		重庆市丰都县	重庆市丰都县		文盲	2018-04-11		拘留 逮捕	不存在明确被害人的纠纷												0	0	0			1	1
00924_周慧萌、钱俊蓉违法发放贷款罪一审刑事判决书					0	（2013）杭上刑初字第182号	2	周慧萌																		2013-03-06	2013-03-12	取保候审 逮捕	不存在明确被害人的纠纷						卢朝辉	王志建					0	0	0
00926_李某某、范某某污染环境一审刑事判决书					0	（2018）豫0422刑初348号	2	李某某	1987-06-15	完全刑事责任能力	1	31			汉族			无业		无业	河南省商水县		河南省周口市川汇区		初中	2018-11-19	2018-11-07	拘留 逮捕 取保候审 逮捕	不存在明确被害人的纠纷						李新卓				河南盐都律师事务所		0	0	0
00928_王杰文贪污、受贿、非国家工作人员受贿二审刑事判决书			1		0	（2018）豫15刑终610号	1	王杰文	1966-01-18	完全刑事责任能力	1	52			汉族			其他		社区支部书记		河南省固始县	固始县		普通高级中学	2017-08-24		拘留 逮捕 取保候审	不存在明确被害人的纠纷												0	0	0		1	0
00929_彭某甲挪用资金一审刑事判决书					0	（2016）粤0883刑初414号	1	彭某甲	1964-10-01	完全刑事责任能力	1	51			汉族						广东省吴川市			中国	初中			拘留 取保候审	其他存在明确被害人的纠纷						叶良平	何嘉惠			广东正德律师事务所律师	广东正德律师事务所	0	0	0				1
00930_吴某、吕耀华、程国良、翟洪涛虚开增值税专用发票、用于骗取出口退税、抵扣税款发票一审刑事判决书					0	（2014）哈刑二初字第121号	4	吕耀华														河北省大城县	大城县			2013-08-23	2014-09-10	拘留 逮捕	不存在明确被害人的纠纷						陈振奎	冯浩		1	北京岳成律师事务所黑龙江分所律师	黑龙江柔德律师事务所律师	0	0	0				0
00931_吴益春盗窃罪一审刑事判决书					0	（2016）浙0122刑初280号	1	吴益春	1970-02-06	完全刑事责任能力	1	46	1	1	汉族			务农		务农			浙江省桐庐县		普通高级中学	2016-03-30	2016-07-04	拘留 逮捕	其他存在明确被害人的纠纷						董宇律		1		浙江凯运律师事务所		0	0	0
00932_刘某某危险驾驶罪一审刑事判决书		简易			0	（2015）杏刑初字第340号	1	刘某某	1988-10-03	完全刑事责任能力	1	27			汉族						山西省垣曲县			中国	普通高级中学		2015-11-20	拘留 取保候审	其他存在明确被害人的纠纷												0	0	0				1
00933_杨红涛盗窃罪一审刑事判决书		普通			0	（2016）浙0103刑初564号	1	杨红涛	1981-12-11	完全刑事责任能力	1	35		1	汉族			无业		无业	湖北省枣阳市			中国	初中	2016-03-30	2016-09-08	逮捕 拘留	其他存在明确被害人的纠纷						胡金东	谭坤			浙江四乔律师事务所	浙江四乔律师事务所	0	0	0				1
00934_顾斌斌诈骗一审刑事判决书-核对		简易			0	（2019）京0101刑初255号	1	顾斌斌	1985-12-03	完全刑事责任能力	1	34			汉族			无业		无业		内蒙古自治区根河市	北京市通州区				2019-04-09	拘留 取保候审	其他存在明确被害人的纠纷						张云勇				北京衡熠律师事务所		0	0	0
00935_周某盗窃罪一审刑事判决书-核对					0	（2015）甬慈刑初字第16号	1	周某										务农		务农						2014-10-08	2014-12-18	拘留 逮捕	其他存在明确被害人的纠纷												0	0	0
00936_刘某某强奸罪一审刑事判决书					0	（2015）孟刑初字第00085号	1	刘某某																		2013-10-16	2013-12-31	拘留 逮捕	其他存在明确被害人的纠纷												0	0	0
00937_李志走私、贩卖、运输、制造毒品一审刑事判决书		简易			0	（2016）鄂0104刑初975号	1	李志	1983-03-25	完全刑事责任能力	1	33	1	1	汉族			无业		无业		湖北省武汉市	武汉市硚口区		初中	2016-08-20	2016-12-01	拘留 逮捕	不存在明确被害人的纠纷												0	0	0				1
00938_高某1、高某2盗窃罪一审刑事判决书					0	（2018）辽0502刑初328号	2	高某1	1970-04-23	完全无刑事责任能力	1	48	1	1	汉族	0	0		0				本溪市平山区			2018-04-04	2018-11-14	拘留 逮捕	其他存在明确被害人的纠纷												0	0	0
00939_何建华盗窃一审刑事判决书					0	（2016）赣01刑初76号	1	何建华	1980-07-13	完全刑事责任能力	1	36	1	1	汉族			无业		无业	南昌市		江西省南昌市新建区	中国	文盲	2016-07-01	2016-11-29	拘留 逮捕	其他存在明确被害人的纠纷						张小平		1		南昌市法律援助中心		0	0	0
00940_孔振功、杨远东犯盗窃罪吴修燕犯掩饰、隐瞒犯罪所得、犯罪所得收益罪一审刑事判决书					0	（2015）东刑初字第584号	3	孔振功					1	1				无业		无业						2015-04-21	2015-11-05	拘留 逮捕	其他存在明确被害人的纠纷						张海峰				山东胜东律师事务所		0	0	0
00941_张力盗窃、传播淫秽物品一审刑事判决书		简易			0	（2017）浙0282刑初1020号	1	张力	1987-09-04	完全刑事责任能力	1	30			汉族	0		务农	0	务农		河南省周口市郸城县	河南省周口市郸城县		初中	2017-06-01	2017-07-07	拘留 逮捕	其他存在明确被害人的纠纷						孙延玉				河南沐天律师事务所		0	0	0
00942_薛某某强奸一审刑事判决书		普通			0	（2018）浙0110刑初87号	1	薛某某			1		1	1	汉族			务工		务工			浙江省乐清市		初中	2018-04-10	2018-01-25	拘留 取保候审 逮捕	其他存在明确被害人的纠纷						吴川	黄鱼龙			上海锦天城（杭州）律师事务所	上海锦天城（杭州）律师事务所	0	0	0
00943_原审被告人赵某某犯危险驾驶罪一案的二审刑事判决书					0	（2015）南刑一终字第00277号	1	赵某某	1982-09-10	完全刑事责任能力	1	33			汉族			务农		务农		河南省唐河县	唐河县		小学			取保候审	其他存在明确被害人的纠纷						郝延坤				河南大为律师事务所		0	0	0		1	0
00944_赵海东,张世喜,周元辉开设赌场罪一审刑事判决书					0	（2015）深龙法刑初字第3950号	3	赵某													湖北省枣阳市			中国		2015-07-16	2015-11-02	拘留 逮捕	不存在明确被害人的纠纷												0	0	0					1
00945_李飞宇李某宇、邓久耀邓某耀生产、销售假药一审刑事判决书					0	（2015）珠香法刑初字第571号	4	李飞宇	1984-09-18	完全刑事责任能力	1	31			汉族	0			0		广东省珠海市香洲区			中国	高等专科学校	2014-11-21	2015-02-08	拘留 逮捕	不存在明确被害人的纠纷						王争				广东广和（珠海）律师事务所		0	0	0				1
00946_林凤龙诈骗案二审刑事判决书				1	0	（2016）吉02刑终166号	2	林某某													吉林省吉林市		吉林市	中国		2016-08-22		拘留 逮捕 取保候审 逮捕 取保候审 逮捕	其他存在明确被害人的纠纷						谢春英	刘扬威				吉林煜博律师事务所	0	0	0
00947_被告人张瑞鑫贩卖毒品罪一审刑事判决书		简易			0	（2018）辽0283刑初284号	1	张瑞鑫	1983-11-03	完全刑事责任能力	1	35	1	1	汉族			无业		无业		辽宁省庄河市	庄河市		初中	2018-04-28	2018-06-07	拘留 逮捕	不存在明确被害人的纠纷												0	0	0
00948_杜战胜盗窃，孟某某、张某某掩饰、隐瞒犯罪所得一审刑事判决书					0	（2014）惠刑初字第208号	3	杜战胜	1988-07-10	完全刑事责任能力	1	26	1	1	汉族											2014-08-29	2014-11-27	拘留 逮捕	其他存在明确被害人的纠纷												0	0	0
00949_孙军、李传、黄运平盗窃罪一案一审刑事判决书					0	（2016）陕0821刑初15号	3	孙军	1978-06-17	完全刑事责任能力	1	38	1	1				无业		无业					小学	2015-06-03	2015-11-20	拘留 逮捕	其他存在明确被害人的纠纷						张雪峰	李娜			陕西秦北律师事务所	陕西秦北律师事务所	0	0	0				1
00950_余长兴、俞书法盗窃、非法持有、私藏枪支、弹药、非法拘禁二审刑事判决书			1		0	（2016）闽刑终417号	2	余长兴	1973-05-13	完全刑事责任能力	1	43			汉族			无业		无业			福建省福清市		小学	2015-04-10		拘留 逮捕	其他存在明确被害人的纠纷						魏斯文				北京中银（福州）律师事务所		0	0	0				1
00951_刘超贩卖毒品一审刑事判决书		速裁			0	（2017）渝0112刑初1670号	1	刘超	1993-10-23	完全刑事责任能力	1	24			汉族			务农		务农			重庆市垫江县			2017-10-27		拘留 逮捕	不存在明确被害人的纠纷												0	0	0
00952_何秀霞、何凡凡虚假诉讼一审刑事判决书					0	（2018）闽0305刑初82号	2	何秀霞	1972-10-19	完全刑事责任能力	0	46			汉族			其他		其他	福建省莆田市荔城区	福建省莆田市		中国	初中	2018-05-11	2018-03-20	拘留 取保候审 逮捕	不存在明确被害人的纠纷												0	0	0
00953_周某某走私、贩卖、运输、制造毒品一审刑事判决书		简易			0	（2017）沪0109刑初832号	1	周某某	1961-12-19	完全刑事责任能力	1	56			汉族						上海市			中国			2017-09-12		不存在明确被害人的纠纷												0	0	0				1		1
00954_赵某盗窃一审刑事判决书					0	（2015）彰刑初字第173号	1	赵某		完全刑事责任能力	1															2015-05-28	2015-07-27	拘留 逮捕	其他存在明确被害人的纠纷						王彬				辽宁鑫晟律师事务所		0	0	0				1
00955_孙海、赵伟等盗窃罪一审刑事判决书		普通			0	（2015）市中刑初字第6号	3	孙某					1	1				务农		务农			临沂市苍山县			2014-10-17	2015-01-05	拘留 逮捕	其他存在明确被害人的纠纷												0	0	0				1
00956_韦珩非法持有、私藏枪支罪二审刑事判决书			1		0	（2013）东刑终字第8号	1	韦某	1958-12-15	完全刑事责任能力	1	55			汉族							青海省循化撒拉族自治县							其他存在明确被害人的纠纷						王平	宋晶			青海省恩泽律师事务所	青海省恩泽律师事务所	0	0	0
00957_孟丽平职务侵占案一审刑事判决书					0	（2015）南刑重字第5号	1	孟丽平	1974-01-23	完全刑事责任能力	0	41			汉族						辽宁省沈阳市皇姑区		北京市朝阳区	中国	普通高级中学	2011-01-05	2011-11-23	拘留 逮捕	其他存在明确被害人的纠纷						李洪陆				北京市时代九和律师事务所		0	0	0
00958_扣小芹、王庆江诈骗一审刑事判决书					0	（2017）皖0322刑初390号	6	扣小芹	1971-03-06	完全刑事责任能力	0	46			汉族			务农		务农			云南省保山市昌宁县		小学	2017-04-28	2017-11-02	拘留 逮捕	其他存在明确被害人的纠纷						杨贝贝				安徽北正律师事务所		0	0	0
00959_被告人王小华掩饰隐瞒犯罪所得、犯罪所得收益案一审刑事判决书		简易			0	（2010）湛刑初字第50号	1	王小华	1978-08-18	完全刑事责任能力	1	32															2010-03-08		不存在明确被害人的纠纷												0	0	0				1
00960_杜雅如走私、贩卖、运输、制造毒品罪一审刑事判决书		简易			0	（2018）浙0103刑初486号	1	杜雅如	1986-11-14	完全刑事责任能力	0	32			汉族			无业		无业	辽宁省东港市			中国	初中	2018-06-11	2018-09-27	拘留 逮捕	不存在明确被害人的纠纷												0	0	0				1
00961_朱锦建犯职务侵占罪一审刑事判决书		简易			0	（2015）新刑二初字第0161号	1	朱锦建																		2014-11-21	2015-07-22	拘留 逮捕	其他存在明确被害人的纠纷												0	0	0
00962_黄某甲寻衅滋事一审刑事判决书		简易			0	（2018）粤1621刑初366号	1	黄某甲	1967-04-02	完全刑事责任能力	1	51	0	0	汉族						广东省紫金县			中国	初中	2018-09-30	2018-12-07	拘留 逮捕 取保候审	其他存在明确被害人的纠纷						邓启鑫		1		广东百旋律师事务所		0	0	0				1	1	1
00963_陈福胜、陈辉胜盗窃罪一审刑事判决书	1				0	（2017）鄂0982刑初13号	2	陈福胜	1985-10-15	完全刑事责任能力	1	32			汉族			无业		无业	湖南省道县	湖南省道县	湖北省宜昌市伍家岗区	中国	小学	2016-09-23	2017-01-03	拘留 逮捕	其他存在明确被害人的纠纷						魏新星				湖北浩法律师事务所		0	0	0
00964_孙甲强奸一审刑事判决书		简易			0	（2018）皖0822刑初21号	1	孙甲	1994-09-06	完全刑事责任能力	1	24			汉族						怀宁县		怀宁县	中国	普通高级中学	2017-11-30	2018-01-16	拘留 逮捕	其他存在明确被害人的纠纷						查卉川				安徽晨曦律师事务所		0	0	0				1	1
00965_向见佩、向启子盗窃、掩饰、隐瞒犯罪所得、犯罪所得收益再审刑事判决书	1				0	（2015）青刑再字第1号	3	向见佩	1984-10-08	完全刑事责任能力	1	31			壮族			无业		无业			南宁市邕宁区		初中	2013-08-30		拘留 逮捕	其他存在明确被害人的纠纷												0	0	0				1	1
00966_周小兵、袁海仁、袁薛军盗窃一案一审刑事判决书		普通			0	（2013）管刑初字第183号	3	周小兵	1979-03-03	完全刑事责任能力	1	34	1	1												2012-06-30	2013-02-05	拘留 逮捕	其他存在明确被害人的纠纷												0	0	0
00967_徐佐斌走私、贩卖、运输、制造毒品二审刑事判决书			1		0	（2016）渝02刑终433号	1	徐佐斌	1970-07-18	完全刑事责任能力	1	46			汉族			无业		无业		重庆市巫山县			高等专科学校	2016-09-29		拘留 逮捕	不存在明确被害人的纠纷												0	0	0					1
00968_李某某强奸一审刑事判决书					0	（2018）沪0116刑初350号	1	李某某			1				汉族						河南省		上海市松江区	中国			2018-03-15		其他存在明确被害人的纠纷						侯某				上海市郑传本律师事务所		0	0	0
00969_张忠元受贿二审刑事判决书			1		0	（2015）川刑终字第636号	1	张忠元	1955-12-09	完全刑事责任能力	1	20			汉族						重庆市江津区		四川省成都市	中国	大学本科	2013-08-31		拘留 逮捕	不存在明确被害人的纠纷						罗勇				四川英特信联合律师事务所		0	0	0
00970_张浩犯盗窃罪熊某犯掩饰、隐瞒犯罪所得、犯罪所得收益罪一审刑事判决书		简易			0	（2013）甬慈刑初字第781号	2	张浩										务农		务农						2012-12-26	2013-05-02	逮捕	其他存在明确被害人的纠纷												0	0	0
00971_曹秀平、曹秀明组织、领导传销活动一审刑事判决书					0	（2018）鄂0115刑初20号	2	曹秀平	1975-03-20	完全刑事责任能力	1	43		0	汉族			其他		无固定职业		安徽省宣城市	安徽省宣城市泾县		初中	2017-07-20		拘留 逮捕	不存在明确被害人的纠纷						廖春勇	胡金凤			湖北多能律师事务所	湖北多能律师事务所	0	0	0				1	1	1
00972_陈某甲、黄某甲等犯强迫交易罪一审刑事判决书					0	（2015）温乐刑初字第359号	7	陈某甲										务农		务农							2015-03-09	拘留 取保候审	其他存在明确被害人的纠纷												0	0	0
00973_林诗若故意伤害罪刑事判决书					0	（2015）临刑初字第10号	1	林某某			1				汉族	0			1						初中	2014-08-21	2014-12-22	逮捕	其他存在明确被害人的纠纷												0	0	0
00974_魏兴旺犯故意杀人罪一审刑事判决书					0	（2016）鲁1326刑初195号	1	魏兴旺	1995-03-18	完全刑事责任能力	1	21			汉族			务农		务农						2016-03-10	2016-06-07	拘留 逮捕	其他存在明确被害人的纠纷												0	0	0				1
00975_邹财荣犯盗窃罪、故意伤害罪李长所、李亮等犯盗窃罪一审刑事判决书					0	（2015）嘉海刑初字第220号	7	邹财荣										务农		务农						2014-04-17	2015-02-25	取保候审 拘留 逮捕	其他存在明确被害人的纠纷						孙晓明	殷林杰			浙江紫薇律师事务所	浙江紫薇律师事务所	0	0	0
00976_伍海洋非法制造、买卖、运输、邮寄、储存枪支、弹药、爆炸物一审刑事判决书		简易			0	（2017）粤0605刑初2752号	1	伍海洋	1991-01-01	完全刑事责任能力	1	26			汉族			务工		务工					初中	2017-06-23	2017-08-23	拘留 逮捕	不存在明确被害人的纠纷												0	0	0
00977_刘玉杰寻衅滋事一审刑事判决书		简易			0	（2018）粤1972刑初1738号	1	刘玉杰	2018-08-21																	2018-07-05		拘留 逮捕	其他存在明确被害人的纠纷												0	0	0				1
00978_王光辉犯盗窃罪、抢夺罪等一审刑事判决书		普通			0	（2014）甬象刑初字第998号	1	王光辉										务农		务农						2014-08-12	2014-11-24	拘留 逮捕	其他存在明确被害人的纠纷						奚利宏		1		浙江人值律师事务所		0	0	0
00979_臧显峰诈骗罪一审刑事判决书					0	（2017）陕0623刑初8号	1	臧显峰			1			1	汉族											2016-09-29			其他存在明确被害人的纠纷												0	0	0				1
00980_李秋成走私、贩卖、运输、制造毒品一审刑事判决书		简易			0	（2017）津0104刑初83号	1	李秋成	1958-09-13	完全刑事责任能力	1	59	1	1	汉族			无业		无业	天津市北辰区		天津市河北区	中国	初中	2016-10-24	2017-01-03	拘留 逮捕	不存在明确被害人的纠纷						莫爱华				天津融诺律师事务所		0	0	0				1
00981_徐龙伢盗窃罪，刘某甲、刘某乙掩饰、隐瞒犯罪所得、犯罪所得收益罪一审刑事判决书					0	（2011）绍越刑初字第618号	3	徐龙伢																		2011-04-18	2011-08-26	拘留 逮捕	其他存在明确被害人的纠纷						杨建龙						0	0	0
00982_侯振庆、许玉峰犯盗窃罪一审刑事判决书					0	（2015）通刑二初字第0147号	2	侯振庆										其他		其他						2015-04-03	2015-06-24	拘留 逮捕	其他存在明确被害人的纠纷						段存付	张林			安徽公德律师事务所	安徽公德律师事务所	0	0	0
00983_王长根猥亵儿童罪一审刑事判决书					0	（2014）甬镇刑初字第722号	1	王长根					1	1				务农		务农						2014-06-13	2014-11-28	拘留 逮捕	其他存在明确被害人的纠纷						项峰		1		浙江同舟律师事务所		0	0	0
00984_周贵林、陆刚盗窃罪一审刑事判决书					0	（2014）通刑二初字第0277号	2	周贵林					1	1				无业		无业						2014-08-14	2014-11-21	拘留 逮捕	其他存在明确被害人的纠纷												0	0	0				1
00985_李某、姬某国有公司、企业、事业单位人员滥用职权、滥用职权一审刑事判决书					0	（2015）黄刑初字第350号	2	李某																		2015-06-11	2015-12-11	拘留 逮捕 取保候审	不存在明确被害人的纠纷						张娅				河北兴骅律师事务所		0	0	0				1
00986_王某、曹某贪污一审刑事判决书					0	（2017）鲁0891刑初155号	2	王某	1975-07-30	完全刑事责任能力	1	42			汉族			务工		电工	济宁市任城区	济宁市任城区	济宁市任城区	中国	中专（包括职业高中，中等专业学校，技工学校）	2017-08-10	2017-11-02	取保候审 拘留 逮捕	不存在明确被害人的纠纷						魏鲁宁				山东文思达律师事务所		0	0	0				1
00987_陈永龙走私、贩卖、运输、制造毒品罪一审刑事判决书		简易			0	（2017）苏0509刑初268号	1	陈永龙	1991-11-02	完全刑事责任能力	1	26			汉族			无业		无业			安徽省六安市叶集区			2016-11-25	2017-02-24	拘留 逮捕	不存在明确被害人的纠纷												0	0	0
00989_麦某某走私、贩卖、运输、制造毒品一审刑事判决书		简易			0	（2018）沪0104刑初598号	1	麦某某			1				维吾尔族						新疆维吾尔自治区阿图什市	新疆维吾尔自治区		中国	小学		2018-09-05	拘留 逮捕	不存在明确被害人的纠纷						雷振清		1		上海金澄律师事务所		0	0	0
00990_马某犯贩卖毒品罪一审刑事判决书					0	（2014）东陵刑初字第536号	1	马某			1							无业		无业	沈阳市和平区			中国	中专（包括职业高中，中等专业学校，技工学校）	2014-05-23	2014-10-16	拘留 逮捕	不存在明确被害人的纠纷						杨骥	李树阳			北京康达律师事务所沈阳分所	北京康达律师事务所沈阳分所	0	0	0				1
00991_江某故意毁坏财物一审刑事判决书					0	（2017）鲁0811刑初873号	1	江某						1												2017-11-27	2017-12-11	拘留 逮捕	其他存在明确被害人的纠纷						马顺旭	秦存璧			山东公明政和律师事务所	山东公明政和律师事务所	0	0	0				1	1
00992_张群晶盗窃一审刑事判决书					0	00992_张群晶盗窃一审刑事判决书	1	张群晶						0									吉林省长春市宽城区			2014-09-04	2015-01-13	拘留 逮捕	其他存在明确被害人的纠纷						陈会艳				吉林常春律师事务所		0	0	0				1
00993_张文豪敲诈勒索、非法经营罪一案一审刑事判决书					0	（2014）嵩刑初字第53号	1	张文豪	1963-08-15	完全刑事责任能力	1	51		0	汉族			务工		中国某行职工	河南省洛阳市			中国	大学本科	2013-09-30		拘留 逮捕	其他存在明确被害人的纠纷						刘高登	高红军			河南航星律师事务所	河南航星律师事务所	0	0	0
00994_金荣臣非法占用农用地罪二审刑事判决书			1		0	（2017）吉05刑终116号	1	金荣臣	1965-10-22	完全刑事责任能力	1	52			满族			务农		务农	柳河县		柳河县	中国	小学	2017-06-14		取保候审 逮捕	不存在明确被害人的纠纷						杨硕				吉林通兴律师事务所		0	0	0					1
00995_尹纪勇盗窃罪一审刑事判决书					0	（2014）东二法刑初字第1386号	1	尹纪勇	1978-12-30	完全刑事责任能力	1	36	1	1	汉族			无业		无业	四川省射洪县		射洪县	中国	初中	2013-12-20	2014-08-26	拘留 逮捕	其他存在明确被害人的纠纷						杨惠萍				广东赋诚律师事务所		0	0	0
00997_杨武、王吉勇等盗窃罪一审刑事判决书					0	（2016）浙0382刑初1268号	3	杨武	1983-11-09	完全刑事责任能力	1	33	1	1	苗族			无业		无业			贵州省兴仁县		小学	2015-12-11	2016-05-27	拘留 逮捕	其他存在明确被害人的纠纷						丁赛乐		1		浙江海昌（乐清）律师事务所		0	0	0
00998_被告人李玉奇犯诈骗罪、仲鑫、孟泽锐犯组织考试作弊罪一审刑事判决书					0	（2018）鲁1722刑初14号	3	李玉奇	1988-09-14	完全刑事责任能力	1	30			汉族			务农		农民		山东省莘县	山东省莘县		大学本科	2017-07-14	2018-01-03	拘留 逮捕	不存在明确被害人的纠纷						王雷	马国			山东盛雅律师事务所	山东盛雅律师事务所	0	0	0
01001_关于原审被告人梁坚云犯合同诈骗罪一案的刑事判决书			1		0	（2014）潭中刑终字第271号	1	梁坚云	1968-05-03	完全刑事责任能力	1	46			汉族			其他		经商					初中	2013-08-06		取保候审 拘留 逮捕	其他存在明确被害人的纠纷						尹福云	王晓鹏			湖南湘瑞律师事务所	湖南湘剑律师事务所	0	0	0
01002_于某某虚假出资一审刑事判决书					0	（2014）正刑初字第5号	1	于某某	1969-12-08	完全刑事责任能力	1	45			汉族										初中		2013-12-18	取保候审	其他存在明确被害人的纠纷												0	0	0				1
01003_张某某、李某某等职务侵占一审刑事判决书					0	（2017）沪0115刑初2403号	3	张某某	1976-10-06	完全刑事责任能力	1	41			汉族						安徽省		上海市闵行区	中国			2017-07-11		不存在明确被害人的纠纷						陈卫	胡志敏			上海市中天律师事务所	上海市中天律师事务所	0	0	0
01004_柳某荣、柳某故意伤害案刑事判决书					1	（2016）云2924刑初34号	2	柳某荣	1964-03-05	完全刑事责任能力	1	52			汉族	0		务农		务农	云南省宾川县			中国	小学		2016-02-01		其他存在明确被害人的纠纷												0	1	1
01005_张长宁妨害公务一审刑事判决书		普通			0	（2018）川0322刑初50号	1	张长宁	1979-02-17	完全刑事责任能力	1	39			汉族			务农		务农	四川省富顺县	四川省富顺县		中国		2017-10-13		拘留 逮捕													0	0	0
01006_刘杨非法持有毒品罪一审刑事判决书					0	（2019）川0116刑初835号	1	刘杨	1985-01-22	完全刑事责任能力	0	34		1	汉族						四川省成都市天府新区		成都市双流区	中国	初中		2019-06-14	取保候审	不存在明确被害人的纠纷												0	0	0				1	1
01007_（2015）阳刑初字第115号王某、李某甲等犯故意伤害罪一审刑事判决书		简易			0	（2015）阳刑初字第115号	3	王某										其他		职工						2015-06-23	2015-06-23	拘留 取保候审 逮捕	其他存在明确被害人的纠纷						徐玉忠	赵辛成			山东光岳律师事务所	山东光岳律师事务所	0	0	0
01008_赵英志盗窃一审刑事判决书					0	（2016）冀0431刑初87号	1	赵英志	1983-04-20	完全刑事责任能力	1	33	1	1	汉族	0	0	务农		务农	河北省曲周县		曲周县	中国	小学			拘留 逮捕	其他存在明确被害人的纠纷						王静义				河北振远律师事务所		0	0	0				1
01009_刘崇献妨害公务一审刑事判决书					0	（2019）冀1081刑初75号	1	刘崇献	1981-10-11	完全刑事责任能力	1	38			汉族	0		务农		务农	山东省聊城市莘县		霸州市	中国	初中	2018-11-13	2019-01-29	拘留 逮捕	其他存在明确被害人的纠纷						荣双庆				河北天禹律师事务所		0	0	0				1
01010_杨得智危险驾驶罪一审刑事判决书					0	（2018）宁0422刑初97号	1	杨得智	1981-06-24	完全刑事责任能力	1	37	0	1	汉族	0		无业		无业	宁夏回族自治区西吉县	宁夏回族自治区西吉县	固原市	中国	小学		2018-06-08	取保候审							王东亮	王亮亮			宁夏回族自治区建业律师事务所	宁夏回族自治区建业律师事务所	0	0	0
01011_万玉华危险驾驶二审刑事判决书				1	0	（2018）赣01刑终320号	1	万玉华	1979-10-08	完全刑事责任能力	1	39			汉族	0		务工		江西嘉旺物业管理有限公司员工		江西省南昌市	江西省南昌市		高等专科学校			拘留 取保候审							王成	赵园园			北京市中银（南昌）律师事务所	北京市中银（南昌）律师事务所	0	0	0		1	0
01012_雷震合同诈骗一审刑事判决书					0	（2018）京0105刑初1890号	1	雷震	1977-02-14	完全刑事责任能力	1	41			汉族	0		无业		无业	北京市西城区			中国		2018-02-12	2018-08-29	拘留 逮捕	其他存在明确被害人的纠纷						任鹏				北京辉远律师事务所		0	0	0
01013_王某等三人犯敲诈勒索罪、非法拘禁罪一案刑事判决书					0	（2016）陕0429刑初93号	3	王某	1983/0/0	完全刑事责任能力	1	33	1	1	汉族			务农		农民	陕西省旬邑县		旬邑县	中国	初中	2016-05-26	2016-09-01	拘留 逮捕	其他存在明确被害人的纠纷												0	0	0
01014_金利敏犯诈骗罪一审刑事判决书					0	(2016)浙0324刑初136号	1	金利敏						0				无业		无业						2015-08-01	2016-01-27	拘留 逮捕	其他存在明确被害人的纠纷												0	0	0
01015_周仲平非法经营罪一审刑事判决书					0	（2018）川0106刑初487号	1	周仲平	1972-12-05	完全刑事责任能力	1	50			汉族			其他		其他	成都市青羊区			中国		2017-11-22	2018-06-04	拘留 逮捕							郑陈蜀	周良美			四川川蓉律师事务所	四川川蓉律师事务所	0	0	0
01016_李美海盗伐林木一审刑事判决书		简易转普通			0	（2016）桂05321刑初15号	1	李美海	1989-06-05	完全刑事责任能力	1	27			汉族			务农		务农		广西壮族自治区合浦县	合浦县		小学	2016-02-02	2016-07-11	拘留 逮捕	其他存在明确被害人的纠纷						占锐	田永鲜			广西先导联合律师事务所	广西先导联合律师事务所	0	0	0
01017_李某犯寻衅滋事罪一审刑事判决书					0	（2015）古刑初字第154号	1	李某	1979-06-17	完全刑事责任能力	1	36			汉族			其他		经商		福建省古田县	古田县		初中	2015-04-30	2015-08-10	拘留 逮捕	其他存在明确被害人的纠纷												0	0	0				1
01018_刘炎、陈银华走私、贩卖、运输、制造毒品一审刑事判决书		简易			0	（2018）鄂0116刑初598号	2	刘炎										无业		无业						2018-06-21	2018-08-30	拘留 逮捕	不存在明确被害人的纠纷												0	0	0
01019_邵某滥伐林木一审刑事判决书					0	（2016）桂1102刑初371号	1	邵某										务农		务农						2016-03-16	2016-04-18	拘留 逮捕	不存在明确被害人的纠纷						吴海波				广西宏民律师事务所		0	0	0				1	1
01020_芮某犯引诱、容留、介绍卖淫罪一审刑事判决书		简易			0	（2015）宜刑初字第816号	1	芮某										其他		个体理发							2015-10-12	拘留 取保候审	不存在明确被害人的纠纷						左国平	谈鹏程			江苏环科园律师事务所	江苏环科园律师事务所	0	0	0				1	1
01021_191王某甲、王某乙故意伤害罪一审刑事判决书					0	（2019）苏0812刑初191号	2	王某甲						1												2019-01-21	2019-04-22	拘留 逮捕	其他存在明确被害人的纠纷						王桂林				江苏尚淮律师事务所		0	0	0
01022_褚某某污染环境一审刑事判决书		简易			0	（2014）虹刑初字第900号	1	褚某某																			2014-06-26		不存在明确被害人的纠纷						赵雪宏				上海吴振军律师事务所		0	0	0
01023_杨天从危险驾驶二审刑事判决书				1	0	（2018）鄂11刑终274号	1	杨天从	1986-01-18	完全刑事责任能力	1	32			汉族			务工		有限公司董事长	湖北省英山县		英山县	中国	中专（包括职业高中，中等专业学校，技工学校）			拘留 取保候审	不存在明确被害人的纠纷												0	0	0
01024_钱某某诈骗案一审刑事判决书					0	（2015）楚刑初字第310号	1	钱某某			1				汉族										初中		2015-11-02	取保候审	其他存在明确被害人的纠纷						李某某				云南XX律师事务所		0	0	0				1
01025_朱××妨害公务罪一审刑事判决书					0	（2014）昌刑初字第642号	1	朱××	1964-01-18	完全刑事责任能力	0	50														2013-12-20	2014-04-22	逮捕	不存在明确被害人的纠纷												0	0	0
01026_孙某某、胡某某寻衅滋事一审刑事判决书					0	（2019）豫1521刑初103号	2	孙某某	1971-05-28	完全刑事责任能力	1	48			汉族			务农		务农		河南省罗山县	罗山县		小学	2018-11-03	2019-04-12	拘留 逮捕	其他存在明确被害人的纠纷						方松				河南保成律师事务所		0	0	0
01027_被告人张卫红、刘芬等涉嫌赌博犯罪一审刑事判决书		简易转普通			0	（2017）湘0124刑初629号	3	张卫红	1971-11-01	完全刑事责任能力	0	46			汉族			务工		工作人员	湖南省		湖南省	中国	普通高级中学	2017-12-08		拘留 取保候审 逮捕	不存在明确被害人的纠纷												0	0	0
01028_刘从伟危险驾驶一审刑事判决书		普通			0	（2016）鲁0203刑初449号	1	刘从伟	1966-10-05	减轻刑事责任能力	1	50			汉族						青岛市市北区	山东省青岛市		中国	高等专科学校		2016-07-11	取保候审 监视居住 取保候审	不存在明确被害人的纠纷						王锦	赵园园			山东中苑律师事务所	山东中苑律师事务所	0	0	0				1	1
01029_尹飞走私、贩卖、运输、制造毒品罪一审刑事判决书		速裁			0	（2018）闽0104刑初959号	1	尹飞	1991-02-19	完全刑事责任能力	1	27			佤族								云南省临沧市沧源佤族自治县		小学	2018-09-05		拘留 逮捕	不存在明确被害人的纠纷												0	0	0
01030_丁某某犯妨害公务罪、危险驾驶罪二审刑事判决书				1	0	（2016）鲁05刑终5号	1	丁某某			1				汉族														不存在明确被害人的纠纷												0	0	0
01031_林威、梁晓兰容留他人吸毒一审刑事判决书		简易			0	（2018）闽0206刑初741号	2	林威	1997-02-23	完全刑事责任能力	0	21			汉族			无业		无业	福建省武平县			中国	初中	2018-08-02	2018-10-17	拘留 取保候审 拘留 逮捕	不存在明确被害人的纠纷												0	0	0				1
01032_郭玉米、李娟金融凭证诈骗、有价证券诈骗一审刑事判决书					0	（2018）皖0422刑初179号	3	郭玉米	1956-08-20	完全刑事责任能力	1	62			汉族			务工		主任			枣庄市山亭区		小学	2017-09-11	2018-04-25	拘留 逮捕	其他存在明确被害人的纠纷						钱成蕊	蒯多友			安徽繁星律师事务所	安徽金六洲律师事务所	0	0	0
01033_谭奇成交通肇事罪再审刑事判决书			1	1	0	（2017）湘刑再5号	1	谭奇成	1959-06-06	完全刑事责任能力	1	58			汉族			务农		务农			耒阳市		小学	2011-10-31		拘留 逮捕 取保候审	其他存在明确被害人的纠纷												0	0	0
01034_吴浩鑫开设赌场罪一审刑事判决书		简易			0	（2019）陕0603刑初23号	1	吴浩鑫	1990/0/0	完全刑事责任能力	1	29			汉族			无业		无业	陕西省延安市安塞区			中国	小学	2018-09-30	2019-01-31		不存在明确被害人的纠纷												0	0	0				1
01035_高志军、王会超徇私枉法一审刑事判决书		普通			0	（2016）豫0821刑初159号	2	高志军	1976-03-12	完全刑事责任能力	1	40			汉族			务工		务工		河南省修武县	修武县		高等专科学校		2016-09-29	拘留 取保候审	不存在明确被害人的纠纷												0	0	0					1
01036_刘道金、李风顺故意伤害一审刑事判决书					0	（2016）豫14刑初7号	3	刘道金	1989-06-03	完全刑事责任能力	1	26			汉族			务农		务农			永城市		初中	2014-01-04	2015-02-12	拘留 逮捕	其他存在明确被害人的纠纷						李德文		1		河南旺达律师事务所		0	0	0
01037_汪志敏诈骗一审刑事判决书		简易			0	（2017）粤0606刑初181号	1	汪志敏	1979-02-12	完全刑事责任能力	1	38	1	1	汉族			无业		无业	湖北省天门市			中国	初中	2016-11-18	2017-02-10	拘留 逮捕	其他存在明确被害人的纠纷												0	0	0
01038_孙杰、刘蕊贪污、受贿二审刑事判决书			1		0	（2017）皖16刑终41号	5	孙杰	1962-02-16	完全刑事责任能力	1	55			汉族			务工		所工作人员	涡阳县	安徽省涡阳县	涡阳县	中国	大学本科	2015-09-11		拘留 逮捕	不存在明确被害人的纠纷						彭线旗				安徽彭线旗律师事务所		0	0	0
01039_兴云峰诈骗一审刑事判决书		普通			0	（2016）吉0204刑初460号	1	兴云峰	1968-09-04	完全刑事责任能力	1	48			汉族								吉林市船营区		初中	2016-08-25	2016-11-24	拘留 逮捕	其他存在明确被害人的纠纷												0	0	0
01040_陈荣危险驾驶一审刑事判决书		简易			0	（2018）黔2626刑初35号	1	陈荣	1987-09-24	完全刑事责任能力	1	31			汉族			务农		务农		贵州省镇远县	镇远县		初中		2018-04-13	取保候审 拘留	不存在明确被害人的纠纷												0	0	0
01041_被告人秦礼山、严为山等诈骗罪一案的刑事判决书					0	（2016）苏0111刑初777号	4	秦礼山	1979-05-10	完全刑事责任能力	1	37	0	0	汉族			无业		无业		江苏省江浦县	南京市浦口区		中专（包括职业高中，中等专业学校，技工学校）	2016-11-16	2016/12/26#2017/2/20	拘留 逮捕	不存在明确被害人的纠纷						徐超	颜景泉			江苏李安祥律师事务所	江苏和忠律师事务所	0	0	0
01042_苏锦前故意伤害一审刑事判决书					0	（2019）粤0783刑初327号	1	苏锦前	1983-09-13	完全刑事责任能力	1	36			汉族			务工		务工		广东省台山市	台山市		初中		2019-06-26	拘留 取保候审	其他存在明确被害人的纠纷						刘伟文						0	0	0
01043_艾可青犯强奸罪一审刑事判决书	1				0	（2014）万源刑初字第71号	1	艾可青	1988-10-26	完全刑事责任能力	1	26			汉族			务农		务农	四川省万源市			中国	小学	2014-05-30	2014-09-12	拘留 逮捕	其他存在明确被害人的纠纷												0	0	0
01044_马次拉走私、贩卖、运输、制造毒品罪一审刑事判决书					0	(2018)新01刑初151号	1	马次拉	1995-10-09	完全刑事责任能力	1	23			彝族			无业		无业		四川省			小学	2018-06-01		拘留 逮捕	不存在明确被害人的纠纷						刘延敏		1		新疆国法律师事务所		0	0	0
01046_被告人李俊奎合同诈骗案一审刑事判决书					0	（2015）狮刑初字第769号	1	李俊奎	1981-07-16	完全刑事责任能力	1	34			汉族			无业		无业			安徽省蒙城县		文盲	2014-10-27	2015-04-14	拘留 逮捕	其他存在明确被害人的纠纷												0	0	0
01047_赵宪明、陈庆贪污一审刑事判决书	1	普通			0	（2014）江蓬法刑初字第309号	2	赵某明	1954-11-07	完全刑事责任能力	1	60			汉族	0						贵州省贵阳市	江门市蓬江区		大学本科	2013-07-22	2014-05-06	拘留 逮捕	其他存在明确被害人的纠纷						冀高智	何敏			广东正高律师事务所	广东正高律师事务所	0	0	0
01048_胡刚一审刑事判决书		速裁			0	（2017）鄂0104刑初632号	1	胡刚	1982-06-03	完全刑事责任能力	1	35																	不存在明确被害人的纠纷												0	0	0
01049_郭献伟侵犯著作权一审刑事判决书					0	（2017）豫01刑初126号	1	郭献伟	1980-06-23	完全刑事责任能力	1	37			汉族			务农		务农					小学	2017-10-12		拘留 取保候审 逮捕	其他存在明确被害人的纠纷						宋西显	马耀祖			北京市盈科（郑州）律师事务所	北京市盈科（郑州）律师事务所	0	0	0
01050_张峰传危险驾驶、妨害公务一审刑事判决书					0	（2019）鲁0305刑初156号	1	张峰传	1968-11-26	完全刑事责任能力	1	51			汉族			其他		个体	山东省淄博市临淄区	淄博市淄川区	山东省淄博市临淄区	中国		2019-02-01	2019-03-07	拘留 逮捕	其他存在明确被害人的纠纷						冯建钟				山东大地人律师事务所		0	0	0
01051_马玉湘犯危险驾驶罪一案一审刑事判决书					0	（2018）湘1225刑初46号	1	马玉湘	1964-05-28	完全刑事责任能力	1	54			汉族			其他		职工		湖南省会同县			高等专科学校		2018-03-15	取保候审 监视居住	其他存在明确被害人的纠纷						朱朝焕				湖南湘和律师事务所		0	0	0
01052_内蒙古自治区鄂伦春自治旗人民检察院与曹某危险驾驶罪一审刑事判决书	1	普通	1		0	（2018）内0723刑初86号	1	曹某	1977-09-23	完全刑事责任能力	1	41			汉族			其他		内蒙古大杨树森林公安局民警		内蒙古自治区	内蒙古自治区		高等专科学校		2016-01-11	取保候审	其他存在明确被害人的纠纷												0	0	0
01053_卢强厚、卢德纪寻衅滋事、危险驾驶一审刑事判决书	1				0	（2019）皖1522刑初159号	3	卢强厚	1980-02-27	完全刑事责任能力	1	39			汉族			务农		务农		安徽省霍邱县			初中	2019-01-18	2019-03-28	逮捕 拘留							毕家富				安徽大鸣律师事务所		0	0	0
01054_冯×等妨害公务罪二审刑事判决书			1	1	0	（2015）二中刑抗中字第1545号	3	段×	1989-03-06	完全刑事责任能力	1	26														2014-04-25		逮捕 取保候审	其他存在明确被害人的纠纷						王亚兵				北京市三维律师事务所		0	0	0		1			1
01056_李洪财、周延栋犯非法吸收公众存款罪一审刑事判决书					0	（2016）鲁0902刑初46号	2	李洪财					0	0			0	其他		泰安市兴盛商务信息咨询有限公司法定代表人						2015-10-21	2016-02-04	逮捕 拘留	其他存在明确被害人的纠纷						李涛				山东东岳律师事务所		0	0	0
01057_丛某某危险驾驶一审刑事判决书		简易			0	（2018）黑0124刑初20号	1	丛某某	1993-08-18	完全刑事责任能力	1	25			汉族			无业		无业	黑龙江省方正县	黑龙江省方正县	黑龙江省方正县	中国	初中	2018-02-11	2018-02-06	拘留 取保候审 逮捕	不存在明确被害人的纠纷												0	0	0
01058_蔡某某非法制造买卖枪支案二审刑事判决书			1		0	（2015）楚中刑终字第57号	6	者某甲	1967-10-04	完全刑事责任能力	1	48			彝族			务农		务农	云南省楚雄市			中国	初中			取保候审	不存在明确被害人的纠纷												0	0	0		0	1
01059_郭某某危险驾驶案一审刑事判决书					0	（2015）红刑初字第77号	1	郭某某	1968-04-16	完全刑事责任能力	1	47		0	汉族			务农		务农		内蒙古自治区赤峰市红山区	赤峰市红山区		小学		2015-01-29	取保候审	其他存在明确被害人的纠纷						麻广军				北京惠诚律师事务所		0	0	0
01060_雷肆书诈骗一审刑事判决书		普通			0	（2017）湘0681刑初295号	1	雷肆书	1982-04-02	完全刑事责任能力	1	35			汉族			无业		无业		湖南省汨罗市	汨罗市		大学本科	2017-06-23	2017-12-07	逮捕 拘留	其他存在明确被害人的纠纷												0	0	0				1
01061_孙某某危险驾驶一审刑事判决书		简易			0	（2018）沪0106刑初1360号	1	孙某某	1969-03-31	完全刑事责任能力	1	49			汉族						上海市宝山区			中国			2018-11-11		不存在明确被害人的纠纷						黄文君		1		上海济昀律师事务所		0	0	0
01062_王某某盗窃案一审刑事判决书					0	（2015）梨刑初字第109号	1	王某某	1996-09-21	完全刑事责任能力	1	17			汉族	0		务农	1	务农		吉林省梨树县	梨树县			2015-01-22	2015-03-20	拘留 逮捕	其他存在明确被害人的纠纷						杨靖		1		梨树县法律援助中心		0	0	0
01063_唐圣志强奸罪、诈骗罪一审刑事判决书		普通			0	（2018）湘0581刑初238号	1	唐圣志	1996-11-27	完全刑事责任能力	1	22			汉族							湖南省武冈市				2018-06-05	2018-08-20	拘留 逮捕	其他存在明确被害人的纠纷												0	0	0
01064_费某故意伤害罪一审刑事判决书					0	（2017）苏0891刑初7号	1	费某	1986-07-20	完全刑事责任能力	1	31			汉族			其他		个体经营户		淮安市			高等专科学校		2017-01-03	取保候审	其他存在明确被害人的纠纷						李恒				江苏天立言信律师事务所		0	0	0
01065_胡从高犯受贿罪、挪用公款罪、周某犯挪用公款罪一审刑事判决书	1				0	（2015）鄂钟祥刑初字第00007号	2	胡从高																		2014-08-14	2014-12-22	逮捕 逮捕	其他存在明确被害人的纠纷						杨玉喜				湖北喜祥致运律师事务所		0	0	0
01066_洪绍鹏、纪琦晖非法经营一审刑事判决书					0	（2017）粤5103刑初238号	5	洪绍鹏	1975-05-08	完全刑事责任能力	1	42			汉族			其他		经商		广东省潮州市潮安区	广东省潮州市潮安区		初中	2016-11-23	2017-05-25	拘留 逮捕	不存在明确被害人的纠纷						刘晓磊				广东粤韩律师事务所		0	0	0
01067_刘永正、郑仙娇、周祥等生产、销售伪劣产品罪一审刑事判决书		普通			0	（2019）浙0381刑初535号	4	马健	1992-09-21	完全刑事责任能力	1	27			汉族	0		务工		务工		河南省武陟县	武陟县		初中	2019-04-09	2019-04-09	拘留 取保候审 逮捕	不存在明确被害人的纠纷						何朝丹		1		浙江玉海律师事务所		0	0	0
01068_吕某犯故意伤害罪一审刑事判决书		普通			0	（2015）北刑初字第661号	1	吕某										无业		无业						2015-08-06	2015-06-08	拘留 取保候审 逮捕	其他存在明确被害人的纠纷						钟伯先				山东睿德律师事务所		0	0	0				1
01069_方学东危险驾驶罪一审刑事判决书		简易			0	（2016）浙0281刑初1724号	1	方某										无业		无业						2016-12-16	2016-12-08	拘留 监视居住 拘留 逮捕	不存在明确被害人的纠纷												0	0	0				1
01070_张某某妨害公务罪、危险驾驶罪、被告人郑某某、王某某妨害公务罪一审刑事判决书					0	（2014）新刑初字第28号	3	张某某	1967-08-20	完全刑事责任能力	1	47			汉族			无业		无业					初中		2013-12-26	拘留 取保候审	其他存在明确被害人的纠纷						段亮	李玉青			内蒙古东日律师事务所	内蒙古东日律师事务所	0	0	0				1	1
01071_王某某等一审刑事判决书					0	（2019）内0824刑初7号	3	王某某	1990-03-07	完全刑事责任能力	1	29			回族			务农		务农					普通高级中学	2018-06-28		拘留 逮捕	不存在明确被害人的纠纷						张春海		1		内蒙古塞外律师事务所		0	0	0				1	1
01072_盛焱山提供侵入、非法控制计算机信息系统程序、工具一审刑事判决书					0	(2017)浙0683刑初811号	1	盛焱山	1995-09-18	完全刑事责任能力	1	22			汉族	0		其他		学生			江苏省丹阳市		大学本科		2017-12-18	拘留 取保候审							王永刚				浙江越泽律师事务所		0	0	0				1
01073_吴某组织卖淫罪一审刑事判决书					0	（2014）珠香法刑初字第1754号	1	吴某	1987-12-22	完全刑事责任能力	1	27			瑶族	0					广西壮族自治区贵港市平南县	广西壮族自治区平南县		中国	普通高级中学	2014-05-30	2014-08-15	拘留 逮捕	不存在明确被害人的纠纷						丁匀				广东尊仁律师事务所		0	0	0
01074_任广友妨害公务、危险驾驶一审刑事判决书		简易			0	（2017）皖0302刑初250号	1	任广友	1974-09-16	完全刑事责任能力	1	43			汉族	0		无业		无业	安徽省固镇县	安徽省固镇县	蚌埠市龙子湖区	中国	初中	2017-05-17	2017-08-18	拘留 逮捕	其他存在明确被害人的纠纷												0	0	0				1
01075_应国平交通肇事一审刑事判决书					0	（2018）赣0111刑初485号	1	应国平	1976-11-16	完全刑事责任能力	1	42	0	0	汉族	0	0	其他		司机		江西省南昌县	江西省南昌县		初中	2018-03-19	2018-08-27	拘留 逮捕	其他存在明确被害人的纠纷						许明刚				江西恒红律师事务所		0	0	0					1
01076_冯宁君贪污一审刑事判决书		普通			0	（2014）宜宾刑初字第250号	1	冯宁君																		2014-06-09	2014-09-16	拘留 拘留	其他存在明确被害人的纠纷												0	0	0
01077_被告人金某某诈骗一案一审刑事判决书					0	（2016）吉2401刑初第414号	1	金某某			1				朝鲜族			无业		无业	吉林省延吉市	吉林省延吉市	内蒙古自治区	中国		2016-03-11	2016-06-27	拘留 逮捕	其他存在明确被害人的纠纷						李日光	申铉成			吉林敖联律师事务所	吉林诚途律师事务所	0	0	0
01078_王某某、毛某某盗窃一审刑事判决书					0	(2018)皖1222刑初147号	7	王某某	1981-04-07	完全刑事责任能力	1	37	0	1	汉族	0	0					安徽省太和县	太和县		初中	2017-08-24	2018-04-03	逮捕 拘留	其他存在明确被害人的纠纷						付勇				安徽浩太律师事务所		0	0	0				1
01079_姚某甲、姚某乙等犯盗窃罪一审刑事判决书		简易			0	（2015）新刑二初字第0156号	3	姚某甲										无业		无业						2015-04-30	2015-07-27	逮捕 拘留	其他存在明确被害人的纠纷												0	0	0
01080_温某危险驾驶、盗窃一审刑事判决书	1				0	（2019）豫1003刑初32号	1	温某	1985-11-11	完全刑事责任能力	1	34	1	1	汉族			无业		无业	河南省临颍县		河南省许昌市建安区	中国	初中	2018-08-04		拘留 取保候审 拘留 逮捕	其他存在明确被害人的纠纷						孙晓兵				河南三兵律师事务所		0	0	0
01081_王伟雄容留他人吸毒一审刑事判决书		简易			0	（2018）闵0123刑初130号	1	王伟雄	1994-02-18	完全刑事责任能力	1	24	1	1	汉族	0		无业		无业	福建省罗源县	福建省罗源县		中国	小学	2018-03-28	2018-06-05	拘留 逮捕	不存在明确被害人的纠纷												0	0	0				1		1
01082_被告人张伯山强奸、强制猥亵一审刑事判决书					0	（2017）陕1021刑初178号	1	张伯山	1940-02-13	完全刑事责任能力	1	77				1			0			陕西省洛南县					2017-11-13	取保候审	其他存在明确被害人的纠纷												0	0	0
01083_杨树东犯滥用职权罪、受贿罪二审刑事判决书			1		0	（2015）淮中刑二终字第00062号	1	杨树东										其他		原盱眙县城市管理局、盱眙县城市管理行政执法局党组书记、副局长						2014-04-04		监视居住 拘留 逮捕	不存在明确被害人的纠纷			1	0		钱中年	张文理			上海四维乐马律师事务所	江苏益淮律师事务所	0	0	0	0	1
01084_夏某某走私、贩卖、运输、制造毒品一审刑事判决书		简易			0	（2019）沪0109刑初6号	1	夏某某	1956-02-19	完全刑事责任能力	1	63		1	汉族	0					上海市			中国			2019-01-13		不存在明确被害人的纠纷												0	0	0				1
01085_潘有权故意杀人一审刑事判决书					0	（2016）黔27刑初39号	1	潘有权	1968-09-01	完全刑事责任能力	1	48			水族	0					贵州省三都县			中国	文盲	2015-11-12	2016-06-02	逮捕	家庭纠纷						潘永祥		1		三都县法律援助中心		0	0	1
01086_被告人徐某犯妨害公务、危险驾驶一案一审刑事判决书案判决书					0	（2018）陕0103刑初77号	1	徐某	1982-06-06	完全刑事责任能力	1	36			汉族	0						甘肃省兰州市	陕西省西安市		大学本科	2017-12-13	2018-01-26	拘留 逮捕	其他存在明确被害人的纠纷						朱亚灵				陕西智晖律师事务所		0	0	0				1	1	1
01087_郑伟交通肇事罪一审刑事判决书				1	0	（2017）宁0104刑初917号	1	郑伟	1987-04-26	完全刑事责任能力	1	30			汉族			无业		无业	宁夏回族自治区银川市兴庆区			中国	初中	2016-05-31	2016/7/25#2017/10/26	拘留 逮捕	其他存在明确被害人的纠纷						于硕				宁夏瀛智律师事务所		0	0	0	1			1
01088_赵某某危险驾驶罪再审刑事判决书	1		1		0	（2016）黑0127刑再2号	1	赵某某										其他		其他		黑龙江省木兰县	黑龙江省木兰县					取保候审	其他存在明确被害人的纠纷						李自刚				黑龙江朗信银龙律师事务所		0	0	0	1			1	1
01089_赵庆福犯挪用资金罪一审刑事判决书		简易			0	（2015）含刑初字第00092号	1	赵庆福			1				汉族			其他		法定代表人、实际控制人	安徽省合肥市蜀山区		安徽省马鞍山市含山县	中国		2014-10-27	2015-04-23	拘留 逮捕	其他存在明确被害人的纠纷						康文华				江西至中律师事务所		0	0	0
01090_胡德智走私、贩卖、运输、制造毒品二审刑事判决书			1		0	（2018）粤刑终1282号	1	胡德智	1970-10-14	完全刑事责任能力	1	48			汉族	0					广东省陆丰市		广东省深圳市宝安区	中国	小学	2016-11-24		拘留 逮捕	不存在明确被害人的纠纷						胡祝红		1		汕尾市法律援助处		0	0	0	0
01091_丁海朝、陈明帅故意伤害一审刑事判决书			1	1	0	（2017）豫1426刑初449号	3	丁海朝	1975-07-05	完全刑事责任能力	1	42			汉族	0		务农		务农	河南省夏邑县		江苏省常熟市	中国	初中	2017-01-20		拘留 取保候审 逮捕	其他存在明确被害人的纠纷						王永雷	刘伟			河南金博大律师事务所	河南栗城律师事务所	0	0	1		1
01092_孙某甲放火、危险驾驶一审刑事判决书		普通			0	（2018）鲁1325刑初32号	1	孙某甲	1970-03-28	完全刑事责任能力	1	48			汉族	0		务农		务农		山东省费县	费县		小学	2017-11-20	2018-01-11	拘留 逮捕	其他存在明确被害人的纠纷						李荣信				山东泰景律师事务所		0	0	0				1	1
01093_柳工资犯贩卖毒品罪一案一审刑事判决书					0	（2009）上刑初字第89号	1	柳工资			1	51				0										2009-03-20	2009-07-02	拘留 逮捕	不存在明确被害人的纠纷						申跃华				河南豫上律师事务所		0	0	0
01094_杨某某危险驾驶一审刑事判决书		简易			0	(2018)黑0124刑初28号	1	杨某某	1972-06-07	完全刑事责任能力	1	46	0	0	汉族	0	0	务农		务农		黑龙江省方正县	黑龙江省方正县		小学	2018-03-01	2018-03-01	拘留 逮捕	不存在明确被害人的纠纷												0	0	0
01095_被告人张竹兰犯故意杀人罪二审刑事判决书			1	1	0	（2014）洛刑二终字第150号	1	张竹兰	1955-11-03	完全刑事责任能力	0	59			汉族			务农		务农			洛阳市洛龙区		小学以下	2006-03-07		拘留 逮捕 取保候审	家庭纠纷						李洪涛	杨明元				河南安多律师事务所	0	0	0
01096_杨某非法经营一审刑事判决书					0	（2015）西刑初字第513号	1	杨某					1	1				其他		个体户						2015-01-17	2015-06-23	拘留 逮捕	不存在明确被害人的纠纷						莫至斌	潘祖贵			广西创想律师事务所	广西创想律师事务所	0	0	0
01097_刘福霖犯故意杀人罪一审刑事判决书					0	（2014）泰刑一初字第19号	1	刘福霖																		2014-05-20	2014-08-29	拘留 逮捕	家庭纠纷						王衍怀	焦裕伟	1	1	山东圣卓恒律师事务所	山东圣卓恒律师事务所	0	0	1
01098_万世福合同诈骗一审刑事判决书					0	（2014）龙刑初字第10号	1	万世福	1965-04-23		1	49			汉族	0		务农		务农	吉林省永吉县		吉林省吉林市昌邑区	中国		2013-09-11	2014-01-14	拘留 逮捕	其他存在明确被害人的纠纷						孟繁印				吉林明达伟业律师事务所		0	0	0
01099_程军、王少辉等犯盗窃罪一审刑事判决书					0	（2015）铜官刑初字第00177号	6	程军	1972-03-08	完全刑事责任能力	1	43	1	1	汉族	0	0	无业		无业	铜陵市铜官山区	安徽省铜陵县	铜陵市	中国		2015-04-15	2015-07-10	拘留 逮捕	邻里矛盾												0	0	0				1
01100_刘广起危险驾驶刑事判决书					0	（2019）京01刑初38号	1	刘广起	1972-03-28	完全刑事责任能力	1	47			汉族	0		其他		个体户	天津市宁河区	天津市		中国	初中		2019-06-12	取保候审	不存在明确被害人的纠纷						左亮	左亚楠	1	1	北京市京师律师事务所	北京市京师律师事务所	0	0	0				1		1
01101_王宗云贪污、受贿一审刑事判决书					0	（2018）云0821刑初35号	1	王宗云	1973-08-15	完全刑事责任能力	1	45			汉族	0		务工		宁洱县财政局农业综合开发办公室（以下简称宁洱县农发办）工作人员	宁洱县		宁洱县	中国	高等专科学校		2018-03-05	取保候审	不存在明确被害人的纠纷												0	0	0
01102_刘福武故意伤害一审刑事判决书					0	（2017）粤19刑初13号	1	刘福武	1992-02-05	完全刑事责任能力	1	25			瑶族	0		务工		务工	广西壮族自治区恭城瑶族自治县			中国	初中	2016-09-14		拘留 逮捕	其他存在明确被害人的纠纷						莫纪军				广西和强律师事务所		0	0	1
01103_申某某6交通肇事一审刑事判决书					0	（2018）豫0782刑初495号	1	申某某6	1964-11-02	完全刑事责任能力	1	52			汉族	0		务农		务农		河南省辉县	辉县		普通高级中学	2018-07-05	2018-07-27	拘留 逮捕	其他存在明确被害人的纠纷						秦莹露				河南尤扬律师事务所		0	0	1
01104_河南省郑州市中级人民法院 刑事判决书 （2014）郑刑一终字第44号			1		0	（2014）郑刑一终字第44号	3	张某某	1973-12-24	完全刑事责任能力	1	41			汉族	0												取保候审	不存在明确被害人的纠纷						孟水				河南神龙剑律师事务所		0	0	0			1
01105_周某、殷某等诈骗罪一审刑事判决书		普通			0	（2014）吴刑二初字第0173号	7	周某甲		完全刑事责任能力			0	0			0		0							2013-09-18	2014-05-27	逮捕	其他存在明确被害人的纠纷						周同	杨铮			江苏南凯律师事务所	江苏九胜律师事务所	0	0	0				1
01106_被告人李某甲涉嫌犯非法转让土地使用权罪一案一审刑事判决书					0	（2013）临刑初字第353号	1	李某甲			1																		不存在明确被害人的纠纷						付士杰				河南华表律师事务所		0	0	0
01107_林魁强奸罪一审刑事判决书		简易转普通			0	（2016）浙0110刑初1072号	1	林魁	1993-07-28	完全刑事责任能力	1	23	1	1	汉族	0	0	务农		务农			江西省抚州市崇仁县			2016-06-17	2016-09-08	拘留 逮捕	其他存在明确被害人的纠纷						宋凯健		1		浙江诺力亚律师事务所		0	0	0				1
01108_吴克利走私、贩卖、运输、制造毒品罪一审刑事判决书		普通			0	（2017）粤0304刑初1555号	1	吴克利			1				汉族						广东省陆丰市			中国	初中	2017-05-18	2017-09-30	拘留 逮捕	不存在明确被害人的纠纷						谢燕娜		1		北京市尚权（深圳）律师事务所		0	0	0
01109_何顺犯故意伤害罪一审刑事判决书					0	（2014）济刑初字第28号	1	何顺										其他		个体经营户						2013-08-27	2014-06-04	拘留 逮捕	其他存在明确被害人的纠纷						张继锋				山东恒正律师事务所		0	0	0
01110_贾某与王某非法侵入住宅罪二审刑事判决书			1		0	（2018）晋02刑终167号	2	贾某	1966-07-15	完全无刑事责任能力	0	54			汉族	0		务工		务工			大同市城区		普通高级中学	2017-12-13		拘留 逮捕	其他存在明确被害人的纠纷						薛向东				山西星瑞律师事务所		0	0	0	0	1	0
01111_李之辰猥亵儿童罪一审刑事判决书	1	普通			0	（2018）川0802刑初106号	1	李之辰	1988-01-29	完全刑事责任能力	1	30	0	1		0	0						广元市利州区		普通高级中学	2017-06-21	2018-02-06	拘留 逮捕	其他存在明确被害人的纠纷												0	0	1
01112_陈友生、温州海螺集团有限公司大东娱乐俱乐部故意伤害一审刑事判决书					0	（2015）浙03刑初150号	1	陈友生	1991-07-07	完全刑事责任能力	1	24	1	1	汉族	0	0	无业		无业	安徽省灵璧县			中国	小学	2016-04-22	2016-12-07	拘留 逮捕	其他存在明确被害人的纠纷						尹传凌				安徽鑫光律师事务所		0	0	1
01113_李某某职务侵占一审刑事判决书		简易			0	（2015）闵刑初字第892号	1	李某某			1															2015-03-10	2015-04-03	拘留 逮捕	不存在明确被害人的纠纷												0	0	0
01114_黄宇昭掩饰、隐瞒犯罪所得、犯罪所得收益一审刑事判决书		简易			0	（2018）浙0402刑初463号	1	黄宇昭	1981-05-05	完全刑事责任能力	1	37			汉族	0							广西壮族自治区宾阳县		小学	2018-01-24	2018-08-27	拘留 逮捕	不存在明确被害人的纠纷												0	0	0
01115_谭燕安强奸罪一审刑事判决书		简易			0	（2018）闵0211刑初1314号	1	谭燕安	1968-08-12	完全刑事责任能力	1	50			汉族	0		务工		务工	浙江省兰溪市			中国	初中	2018-11-01	2018-12-29	拘留 逮捕	其他存在明确被害人的纠纷												0	0	0				1		1
01116_阮绪秩故意杀人罪一审刑事判决书					0	（2015)浙温刑初字第220号	1	阮绪秩	1964-08-01	完全刑事责任能力	1	49	1	1	汉族	0	0	务工		务工		湖北省阳新县			小学	2015-07-25	2015-12-24	拘留 逮捕	其他存在明确被害人的纠纷						周义军		1		浙江中坚律师事务所		0	0	1
01117_高寒等故意伤害案一审刑事判决书					0	（2014）红中刑二初字第59号	6	高寒	1993-09-07	完全刑事责任能力	1	21	1	1	汉族	0		无业		无业					初中		2014-07-11	取保候审	其他存在明确被害人的纠纷						杨煜峰	牟晓怡			云南盟志律师事务所	云南盟志律师事务所	0	0	1
01118_被告人傅某犯盗窃罪一审刑事判决书		普通			0	（2014）玄刑初字第276号	1	傅某	1962-10-16	完全刑事责任能力	1	52			汉族	0		务工		务工						2014-04-26	2014-08-12	拘留 逮捕	不存在明确被害人的纠纷						房明忠	周玉芳			江苏明宏律师事务所	江苏开昌律师事务所	0	0	0					1
01119_被告人龙以尚、龙春芳、李星强等诈骗罪一审刑事判决书					0	（2015）雨刑二初字第122号	7	龙以尚	1986-02-17	完全刑事责任能力	1	29			汉族	0										2015-08-15	2015-12-10	拘留 逮捕	其他存在明确被害人的纠纷						张桂宝	陈栋			江苏海浪律师事务所	江苏海浪律师事务所	0	0	0
01120_梁某合同诈骗、职务侵占—审刑事判决书					0	（2014）雁刑初字第00316号	1	梁某	1983-01-28	完全刑事责任能力	1	31			汉族	0									普通高级中学	2013-05-24	2013-12-24	拘留 逮捕	其他存在明确被害人的纠纷												0	0	0
01121_699王某盗窃罪一审刑事判决书		简易			0	（2018）苏0312刑初699号	1	王某	1988-12-03	完全刑事责任能力	1	30			汉族			务农		务农			徐州市铜山区			2018-08-13	2018-08-08	拘留 取保候审 逮捕	其他存在明确被害人的纠纷												0	0	0
01122_张某甲、殷某等诈骗罪金某诈骗罪、聚众斗殴罪一审刑事判决书		简易转普通			0	（2018）苏0281刑初1714号	6	张某甲										务工		务工						2019-04-11	2018-08-03	拘留 取保候审 逮捕	其他存在明确被害人的纠纷						刘梦霞				北京大成（南京）律师事务所		0	0	0				1
01123_杨佳衡贷款诈骗案二审刑事判决书			1		0	（2016）湘31刑终252号	1	杨佳衡	1984-06-04	完全刑事责任能力	1	28			苗族			无业		无业		湖南省泸溪县			初中	2016-05-20		拘留 逮捕	不存在明确被害人的纠纷												0	0	0			0
01124_代江一审刑事判决书					0	（2014）普中刑初字第171号	1	代江	1977-07-02	完全刑事责任能力	1	37	0	0	哈尼族			务农		务农	墨江县		宁洱县	中国	初中	2013-09-26	2014-04-21	拘留 逮捕	家庭纠纷						谢震东		1		云南奉新律师事务所		0	0	1				1	1
01125_866陈运得故意伤害罪一审刑事判决书		简易转普通			0	（2018）苏0583刑初866号	1	陈运得	1980-08-27	完全刑事责任能力	1	38	1	1	汉族			务农		务农			广西壮族自治区桂林市临桂县			2018-04-11	2018-05-14	拘留 逮捕													0	0	0
01126_赖瑞龙保险诈骗一审刑事判决书		简易转普通			0	（2013）平刑初字第241号	1	赖瑞龙	1986-09-02	完全刑事责任能力	1	27			汉族			务农		务农		福建省平和县				2013-04-02	2013-07-12	逮捕							胡溪泉				福建元光律师事务所		0	0	0
01127_王少辉故意伤害一审刑事判决书					0	（2017）粤0781刑初363号	1	王少辉	1994-06-26	完全刑事责任能力	1	23			汉族							河南省汝阳县	汝阳县		初中	2017-04-26	2017-08-10	拘留 逮捕	其他存在明确被害人的纠纷						赵华林				广东安法律师事务所		0	0	0
01128_王某某走私、贩卖、运输、制造毒品一审刑事判决书		简易			0	（2015）嘉刑初字第273号	1	王某某																			2015-02-06								顾杰		1		上海市大众律师事务所		0	0	0
01129_胡明跃、胡理洁犯诈骗罪一审刑事判决书		简易			0	2016）浙0324刑初1103号	2	胡某甲			1				汉族			其他		经商		浙江省永嘉县				2016-09-05	2016-08-26	逮捕 取保候审 逮捕	其他存在明确被害人的纠纷						杨跃枢				浙江永瓯律师事务所		0	0	0
01130_闫超犯强奸罪、强制猥亵、侮辱妇女罪一审刑事判决书					0	（2015）乳刑初字第187号	1	闫某					1	1				其他		其他						2015-05-04	2015-06-30	逮捕	其他存在明确被害人的纠纷												0	0	0
01131_钟子凤诈骗一审刑事判决书					0	（2016）粤1302刑初808号	1	钟子凤			0				汉族			无业		无业	广东省惠州市惠城区			中国		2016-07-20		逮捕 拘留	其他存在明确被害人的纠纷						余安平	胡永升			广东卓凡（仲恺）律师事务所律师	广东卓凡（仲恺）律师事务所律师	0	0	0
01132_钮祥柱滥伐林木一审刑事判决书					0	（2017）皖1324刑初437号	1	钮祥柱	1969-10-09	完全刑事责任能力	1				汉族			务农		务农		安徽省泗县	安徽省泗县			2017-06-05	2017-06-02	取保候审 逮捕							陈永				安徽玉金律师事务所		0	0	0	1
01133_蒋学东盗窃罪一审刑事判决书		简易			0	（2017）京0108刑初2121号	1	蒋学东	1986-07-17	完全刑事责任能力	1	31			汉族			无业		无业	山西省怀仁县	山西省怀仁县		中国	大学本科	2017-03-04	2017-08-24	逮捕							李云飞				北京六飞律师事务所		0	0	0				1
01134_白某等与刘泽圆故意伤害一审刑事判决书					0	（2018）京03刑初124号	1	刘泽圆	1991-12-28	减轻刑事责任能力	1	17														2018-07-14	2018-10-22	拘留 逮捕	其他存在明确被害人的纠纷						王剑		1		京市天济律师事务所		0	0	0
01135_王林军、韩立军非法吸收公众存款一审刑事判决书					0	（2018）冀0631刑初23号	2	王林军	1970-11-11	完全刑事责任能力	1	48			汉族							山东省滨州市	滨州市		中专（包括职业高中，中等专业学校，技工学校）		2018-02-14		其他存在明确被害人的纠纷						张跃军	耿海滢			山东民杰律师事务所	山东民杰律师事务所	0	0	0				1	1
01136_邹云龙故意杀人一审刑事判决书					0	（2016）陕03刑初15号	1	邹云龙	1971-09-08		1												凤翔县			2015-08-19	2016-02-23	拘留 逮捕	其他存在明确被害人的纠纷						姚红星				陕西西虢律师事务所		0	0	0				1	1
01137_任权明犯故意伤害案刑事判决书	1				0	（2016）甘刑终59号	1	任权明	1961-06-05	完全刑事责任能力	1	55			汉族			务农		务农	甘肃省会宁县人		甘肃省会宁县人	中国		2015-01-26		拘留 逮捕	家庭纠纷						马永强		1		甘肃兴正天律师事务所		0	0	0			1
01138_陈某猥亵儿童一审刑事判决书					0	（2017）闽0981刑初367号	1	陈某	1986-12-03		1				汉族			务工		务工	福安市		福安市	中国	小学	2017-06-07	2017-08-22														0	0	0
01139_张明华虚开增值税专用发票二审刑事判决书			1		0	（2016）沪刑终41号	1	张明华																					不存在明确被害人的纠纷						冯霖毅				上海公誉律师事务所		0	0	0			1
01140_赵德武、胡树芳走私、贩卖、运输、制造毒品一审刑事判决书					0	（2015）德刑三初字第75号	2	赵德武	1988-09-13	完全刑事责任能力	1	27			汉族			无业		无业	云南省保山市人		云南省保山市	中国	初中	2014-10-24		拘留 逮捕	不存在明确被害人的纠纷						洪兴荣				云南和序律师事务所		0	0	0
01141_倪一恒故意杀人罪一审刑事判决书					0	（2017）浙02刑初85号	1	倪一恒	1982-05-18	完全刑事责任能力	1	35			汉族			务工		务工		浙江省象山县	象山县			2017-04-11	2017-08-16	拘留 逮捕	家庭纠纷						窦杨		1		京盈科（宁波）律师事务所		0	0	0
01142_谢淑英等贪污案刑事判决书			1		0	（2017）湘07刑终193号	5	谢淑英	1956-11-09	完全刑事责任能力	0	61			汉族			其他		党组副书记、副局长		湖南省常德市鼎城区			大学本科	2015-07-16		拘留 逮捕	不存在明确被害人的纠纷						魏英武				湖南中思律师事务所		0	0	0			1
01143_陈某某非法制造、买卖、运输、邮寄、储存枪支、弹药、爆炸物一审刑事判决书					0	（2017）粤1226刑初137号	1	陈某某	1978-01-01	完全刑事责任能力	1	39	0	0	汉族		0				广东省德庆县			中国	初中	2017-08-02		拘留 逮捕							林锦永		1		广东创致律师事务所		0	0	0
01144_夏凤元故意杀人一审刑事判决书					0	（2016）京03刑初8号	1	夏凤元	1957-11-03	完全刑事责任能力	1	59		1							北京市朝阳区			中国	普通高级中学	2015-08-28	2016-01-05	拘留 逮捕	邻里矛盾						韩英英	韩一村			北京市普贤律师事务所	北京市普贤律师事务所	0	0	0
01145_李海风、陈猛等犯盗窃罪一审刑事判决书		普通			0	（2016）苏0583刑初716号	3	李海风										其他		其他						2016-01-06	2016-04-20	拘留 逮捕	其他存在明确被害人的纠纷						董功超				北京市惠诚（昆山）律师事务所		0	0	0				1
01146_李清学危险驾驶罪二审刑事判决书			1		0	（2018）宁01刑终57号	1	李清学	1964-09-15	完全刑事责任能力	1	54			汉族			其他		其他	河南省平顶山市	河南省平顶山市	宁夏回族自治区银川市	中国	普通高级中学			取保候审													0	0	0		1	0
01147_徐善永、徐焰故意伤害一审刑事判决书					0	（2015）厦刑初字第102号	2	徐善永	1987-09-16	完全刑事责任能力	1	28			汉族			其他		其他	安徽省宿州市灵璧县			中国	普通高级中学	2015-01-07	2015-08-06	拘留 逮捕	其他存在明确被害人的纠纷						张海勇	江敏			北京大成（厦门）律师事务所	北京大成（厦门）律师事务所	0	0	0
01148_王静合同诈骗罪一审刑事判决书					0	（2016）京0106刑初513号	1	王静	1978-06-16	完全刑事责任能力	0	38														2016-02-06	2016-04-27		其他存在明确被害人的纠纷						张砾心						0	0	0
01150_郭忠富、娄长亮、杨立国受贿一审刑事判决书					0	（2015）萨刑初字第181号	3	郭忠福	1965-12-06	完全刑事责任能力	1	50			汉族							黑龙江省龙江县	大庆市		大学本科	2014-07-28	2014-09-12	拘留 逮捕							孙昌明				黑龙江鸿大律师事务所大庆分所		0	0	0	1				1
01151_康某某;陈某某非法制造、买卖、运输、邮寄、储存枪支、弹药、爆炸物罪一审刑事判决书					0	（2012）深福法刑初字第778号	2	康某某			1			0	汉族			其他		科技公司员工	黑龙江省尚志市			中国	初中	2011-09-14		拘留 逮捕	不存在明确被害人的纠纷												0	0	0				1	1
01152_薛某交通肇事一审刑事判决书					0	（2018）鲁0281刑初357号	1	薛某			1				汉族			其他		个体	山东省胶州市		山东省胶州市	中国	初中	2018-04-28	2018-07-18	拘留 逮捕	其他存在明确被害人的纠纷												0	0	0
01153_陈德喜非法持有、私藏枪支、弹药一审刑事判决书					0	（2017）粤0981刑初241号	1	陈德喜	1979-03-27	完全刑事责任能力	1	38			汉族			其他		经商	广东省高州市		高州市	中国	初中	2017-05-23		拘留 逮捕	不存在明确被害人的纠纷						林谷丰				广东雄兴律师事务所		0	0	0
01154_杨立强故意伤害罪二审刑事判决书					0	（2017）宁01刑终301号	1	杨立强	1990-03-29	完全刑事责任能力	1	27			汉族			无业		无业	宁夏回族自治区灵武市		宁夏回族自治区灵武市	中国	初中	2016-11-21		逮捕 拘留	其他存在明确被害人的纠纷												0	0	0		1	0
01155_代某某强奸一审刑事判决书		简易			0	（2017）苏0505刑初221号	1	代某某	1995-01-27	完全刑事责任能力	1	22			汉族			务工		务工					初中	2017-06-27	2017-06-15	拘留 逮捕 取保候审	其他存在明确被害人的纠纷						朱春杰				江苏和舟律师事务所		0	0	0
01156_李庆文故意伤害一审刑事判决书					0	（2016）云25刑初59号	1	李庆文	1991-10-03	完全刑事责任能力	1	25			汉族			无业		无业	云南省河口瑶族自治县		河口瑶族自治县	中国	中专（包括职业高中，中等专业学校，技工学校）	2015-02-23		拘留 逮捕	其他存在明确被害人的纠纷						汤华				南众序律师事务所		0	0	0				1
01157_莫义龙犯拒不执行裁定罪一案刑事判决书		简易			0	（2016）黔2726刑初199号	1	莫义龙	1969-01-30	完全刑事责任能力	1	47			汉族			务农		务农		贵州省独山县	独山县		小学	2016-06-07	2016-11-01	拘留 逮捕	不存在明确被害人的纠纷												0	0	0
01158_刘2职务侵占一审刑事判决书					0	（2018）沪0101刑初133号	1	刘2	1982-09-24	完全刑事责任能力	1	36			汉族			其他		业务员	山西省			中国			2018-02-11														0	0	0
01159_彭三清走私、贩卖、运输、制造毒品一审刑事判决书		简易			0	（2017）京0114刑初484号	1	彭三清	1968-08-28	完全刑事责任能力	1	48	1	1	汉族		0	务农		务农	湖南省衡南县	湖南省		中国	小学	2017-04-01	2017-06-09														0	0	0				1
01160_李建扬犯故意杀人罪一审刑事判决书					0	（2016）苏10刑初10号	1	李建扬		完全刑事责任能力			1	1			0									2016-01-13	2016-05-11		其他存在明确被害人的纠纷						陈峰				苏大扬律师事务所		0	0	1				1	1
01161_左某强奸罪一审刑事判决书		简易			0	（2007）越刑初字第586号	1	左某					0	0			0									2007-07-13	2007-08-10	拘留 逮捕	其他存在明确被害人的纠纷												0	0	0				1
01162_李某、李某甲犯贪污罪二审刑事判决书			1	1	0	（2014）西刑终字第14号	2	李某	1965-05-08	完全刑事责任能力	1	49			汉族										大学本科	2013-06-21		逮捕 拘留 取保候审	不存在明确被害人的纠纷						尚杭宁				青海贝正律师事务所		0	0	0		1	0
01163_王自辉行贿一审刑事判决书					0	（2018）湘0302刑初235号	1	王自辉	1963-10-29	完全刑事责任能力	1	55			汉族			其他		个体工程老板	湖南省湘乡市			中国	初中	2017-12-06	2018-05-23	逮捕	不存在明确被害人的纠纷						胡勇平	尹国荣			湖南闻胜律师事务所	湖南闻胜律师事务所	0	0	0
01164_徐小春非法吸收公众存款一审刑事判决书					0	（2017）浙0122刑初365号	1	徐小春	1978-11-16	完全刑事责任能力	1	39			汉族			其他		有限公司实际控制人		浙江省桐庐县	浙江省桐庐县		初中	2017-11-20	2017-09-18	拘留 逮捕 取保候审	其他存在明确被害人的纠纷						朱琴芳				浙江保椒律师事务所		0	0	0
01165_聂某3一审刑事判决书	1				0	（2018）甘05刑初4号	1	聂某3													甘肃省武山县		武山县	中国											颜某		1		天水宏达律师事务所		0	0	1
01166_马琰诈骗罪、非法经营罪一审刑事判决书					0	（2015）一中刑初字第0030号	1	马琰	1974-02-27		1				汉族			其他		有限公司法定代表人			天津市北辰区		大学本科	2014-01-22		拘留 逮捕	其他存在明确被害人的纠纷						黄俊成				天津知方律师事务所		0	0	0
01167_颜子豪、颜天真犯故意伤害罪田某犯窝藏、包庇罪一审刑事判决书					0	（2015）浙杭刑初字第199号	3	颜子豪																		2015-05-14	2015-11-20	拘留 逮捕							刘文兵						0	0	1
01168_祝勤浩、王贵明故意伤害一审刑事判决书					0	（2016）皖15刑初22号	5	祝勤浩	1998-03-27	完全刑事责任能力	1	18			汉族			无业		无业	安徽省六安市		安徽省六安市裕安区	中国	初中	2016-05-19	2016-11-10	拘留 逮捕	其他存在明确被害人的纠纷						葛子宏	葛济川			安徽众兴律师事务所	安徽众兴律师事务所	0	0	1				1
01169_蔡德刚故意杀人一审刑事判决书	1				0	（2018）鄂11刑初1号	1	蔡德刚	1981-11-03	完全刑事责任能力	1	27		1	汉族			无业		无业	湖北省浠水县		浠水县	中国	小学	2017-04-24	2018-01-02	拘留 逮捕							徐泽春		1		湖北文赤壁律师事务所		0	0	0
01170_王志财故意杀人一审刑事判决书					0	（2015）哈刑二初字第37号	1	王志财		完全刑事责任能力											辽宁省大连市甘井子区		黑龙江省哈尔滨市阿城区	中国		2014-12-05	2015-04-09								徐桂元	徐学滨			黑龙江大公律师事务所	黑龙江大公律师事务所	0	0	1
01171_杜文向、张平雷故意杀人案一审刑事判决书					0	（2014）攀刑初字第37号	2	杜文向	1985-05-25	完全刑事责任能力	1	29			汉族			无业		无业	四川省泸县			中国	初中	2014-02-13	2014-08-12	拘留 逮捕	其他存在明确被害人的纠纷						黄新				四川攀法律师事务所		0	0	0				1
01172_吴某介绍卖淫罪一审刑事判决书		普通			0	（2013）雨刑初字第126号	1	吴某	1983-01-03	完全刑事责任能力	0	30	0	0	汉族		0	无业		无业						2013-05-24	2013-08-19	拘留 逮捕	不存在明确被害人的纠纷						王玲	李蒙			江苏衡鼎律师事务所	江苏衡鼎律师事务所	0	0	0
01173_朱帅贩卖毒品罪一审刑事判决书		简易			0	（2017）渝0103刑初411号	1	朱帅	1992-11-01	完全刑事责任能力	1	25			汉族			无业		无业			重庆市万盛区		普通高级中学	2017-02-18	2017-04-19	拘留 逮捕													0	0	0
01174_刘晓龙、刘波合同诈骗一审刑事判决书					0	（2015）长刑二初字第16号	2	刘晓龙	1986-07-25	完全刑事责任能力	1	29			汉族							内蒙古自治区赤峰市	长春高新技术产业开发区		大学本科	2014-09-10	2015-08-18	拘留 逮捕	其他存在明确被害人的纠纷						王兴志				吉林常春律师事务所		0	0	0
01175_李剑泉走私珍贵动物、珍贵动物制品罪一审刑事判决书					0	（2015）四中刑初字第26号	1	李剑泉	1972-12-11	完全刑事责任能力	1	42						其他		个体经营						2015-04-08		拘留 逮捕	不存在明确被害人的纠纷						杨莫野				北京市大地律师事务所		0	0	0
01176_冷智勇犯合同诈骗罪、虚假出资、抽逃出资罪一审刑事判决书	1				0	（2014）颍刑初字第00203号	1	冷智勇	1964-02-14	完全刑事责任能力	1	50			汉族			其他		法人代表			浙江省杭州市上城区				2012-12-17	逮捕	其他存在明确被害人的纠纷						余鸿飞				安徽皖北律师事务所		0	0	0	1
01177_蒋某故意杀人罪一审刑事判决书					0	（2014）渝五中法刑初字第00122号	1	蒋祎			1		1	1	汉族		0	无业		无业					普通高级中学	2014-06-27	2014-10-08	逮捕	其他存在明确被害人的纠纷						张宏国		1		重庆市法律援助中心		0	0	0
01178_马×等非法出售增值税专用发票罪一审刑事判决书					0	（2014）海刑初字第299号	3	陈玉宝	1969-08-22	完全刑事责任能力	1	45						其他		公司负责人						2013-04-19		逮捕	不存在明确被害人的纠纷												0	0	0
01179_邓某甲、李某甲故意伤害一审刑事判决书					0	（2015）佛三法少刑初字第80号	2	邓某甲	2015-11-11																		2015-11-11		其他存在明确被害人的纠纷						江国荣				广东蓝天柱律师事务所		0	0	0				1
01180_张明明故意杀人一审刑事判决书					0	（2018）京01刑初20号	1	张明明	1988-03-01	完全刑事责任能力	1	30			汉族			无业		无业	黑龙江省巴彦县	黑龙江省巴彦县		中国	高等专科学校	2017-10-13	2018-01-10	逮捕	其他存在明确被害人的纠纷						陈蔚然		1		北京市荣德律师事务所		0	0	1
01181_郑银成非法采矿一审刑事判决书		普通			0	（2019）豫0821刑初18号	1	郑银成	1960-02-10	完全刑事责任能力	1	59			汉族			务农		务农		河南省修武县	修武县		普通高级中学	2018-09-28	2019-01-10	拘留 逮捕	不存在明确被害人的纠纷						许振东				河南云台律师事务所		0	0	0
01182_刘国锋危险驾驶罪一审刑事判决书		速裁			0	（2019）浙0921刑初94号	1	刘国锋	1976-10-12	完全刑事责任能力	1	43			汉族			务工		务工							2019-08-16	拘留 取保候审	不存在明确被害人的纠纷												0	0	0				1		1
01184_被告人马青故意伤害被告人马文元、马阿卜都窝藏二审刑事判决书			1		0	（2015）青刑一终字第13号	3	马青	1984-03-10	完全刑事责任能力	1	31	1	1	回族		0	无业		无业	青海省化隆回族自治县		青海省西宁市城东区	中国	小学	2014-07-11		逮捕							袁海平				北京汉卓律师事务所		0	0	0		1
01185_姚克树、汪以从生产、销售有毒、有害食品一审刑事判决书					0	（2019）皖1124刑初134号	3	汪以从	1971-12-28	完全刑事责任能力	1	48			汉族			其他		个体户	安徽省全椒县	安徽省全椒县	安徽省全椒县	中国	初中	2019-01-09	2019-04-10	逮捕 拘留							秦勇		1		安徽椒陵律师事务所		0	0	1				1
01186_王万元、邓贵荣走私、贩卖、运输、制造毒品一审刑事判决书					0	（2018）云25刑初19号	2	王万元	1982-09-12	完全刑事责任能力	1	36	1	1	瑶族			务农		务农	云南省绿春县		绿春县	中国	文盲	2017-09-30	2018-01-10	拘留 逮捕	不存在明确被害人的纠纷						肖建伟		1		云南众序律师事务所		0	0	0				0	0
01187_李晓东交通肇事一审刑事判决书					0	（2018）豫0181刑初161号	1	李晓东	1984-03-25	完全刑事责任能力	1	34			汉族			务农		务农	河南省巩义市		河南省巩义市	中国		2018-02-28	2018-02-28	拘留 逮捕 取保候审							曹好景				河南九诚律师事务所		0	0	0				1
01188_樊东强诈骗一审刑事判决书					0	（2016）桂0802刑初473号	1	樊东强	1974-12-26	完全刑事责任能力	1	42			壮族			无业		无业		广西壮族自治区邕宁县	南宁市江南区		初中	2016-09-30	2016-12-09	拘留 逮捕	其他存在明确被害人的纠纷						梁文超				广西桂三力律师事务所		0	0	0
01189_李明故意伤害一审刑事判决书		简易转普通			0	（2019）京0113刑初35号	1	李明	1980-10-17	完全刑事责任能力	1	39			汉族			务农		务农	河南省信阳市平桥区	河南省信阳市		中国	初中		2018-12-25	拘留 取保候审	其他存在明确被害人的纠纷						肖伟宾		1		北京天初律师事务所		0	0	0
01190_何海涛非法经营案一审刑事判决书					0	（2016）沪0115刑初3384号	1	何海涛	1979-05-17	完全刑事责任能力	1	37			汉族			务农		务农	湖南省郴州市汝城县		广东省广州市天河区	中国	初中	2016-01-22	2016-09-27	拘留 逮捕							周华明				北京盈科（上海）律师事务所		0	0	0				1
01191_王远明犯盗窃罪一审刑事判决书	0	普通			0	（2018）陕0902刑初81号	1	王远明	1987-11-10	完全刑事责任能力	1	31	0	0	汉族		0				安康市汉滨区	安康市汉滨区		中国	小学		2018-02-01	取保候审	家庭纠纷						徐生明		1		陕西持衡律师事务所		0	0	0	0			1	0
01192_姚传勇故意伤害一审刑事判决书	0	普通			0	（2017）粤09刑初66号	1	姚传勇	1992-02-28	完全刑事责任能力	1	25			汉族							湖北省建始县	湖北省建始县		初中	2016-12-10	2017-07-31	逮捕 拘留	其他存在明确被害人的纠纷						邱日彬		1		广东海日律师事务所律师		0	0	0	0
01193_刑事判决书	0	普通			0	（2019）桂09刑初48号	7	姚骄航	2000-06-04	完全刑事责任能力	1	19			汉族			务农		务农		广西壮族自治区玉林市福绵区	玉林市		初中	2019-01-12	2019-10-25	逮捕 拘留	其他存在明确被害人的纠纷						潘妮		0		广西金大地律师事务所		0	0	0				0
01194_黄建维故意杀人一审刑事判决书	0	普通			0	（2015）红中刑二初字第85号	1	黄建维	1993-12-21	完全刑事责任能力	1	22			汉族			务农		务农		云南省蒙自市	蒙自市		小学	2015-05-07	2015-11-11	逮捕 拘留	其他存在明确被害人的纠纷						李林海	李雪	0	0	云南天方律师事务所	云南天方律师事务所	0	0	0				1
01195_高忠和等四人寻衅滋事一审刑事判决书	0	普通			0	（2016）辽0212刑初227号	5	高忠和		完全刑事责任能力	1		0	1			0									2016-01-06	2016-08-18	逮捕 拘留	不存在明确被害人的纠纷												0	0	0
01196_孙某犯危险驾驶罪一审刑事判决书	0	简易			0	（2016）鲁1003刑初168号	1	孙某	1960-03-03	完全刑事责任能力	1	56			汉族			其他		其他		威海市文登区			普通高级中学		2016-05-19	取保候审													0	0	0
01197_程某某走私、贩卖、运输、制造毒品一审刑事判决书	0	简易			0	（2018）沪0106刑初623号	1	程某某	1961-02-26	完全刑事责任能力	1	47			汉族						上海市静安区		上海市宝山区	中国			2018-06-04														0	0	0
01198_李圣德故意伤害一审刑事判决书	0	普通			0	（2016）粤08刑初37号	1	李圣德	1976-02-04	完全刑事责任能力	1	40			汉族			务农		务农	黑龙江省庆安县	黑龙江省庆安县	广东省湛江市湛江经济技术开发区	中国	初中	2015-10-23	2016-05-17	逮捕 拘留	其他存在明确被害人的纠纷						王丽茹		1		湛江市法律援助处		0	0	1
01199_米福秀、舒梦梦等组织卖淫罪唐光发协助组织卖淫罪二审刑事判决书	0	普通	1		0	（2017）浙01刑终470号	4	米福秀	1977-09-24	完全刑事责任能力	0	40			汉族			务农		务农	湖南省辰溪县			中国	初中	2015-09-11		逮捕 拘留	不存在明确被害人的纠纷												0	0	0		0	1
01200_刘忠辉、李传芬等妨害公务一审刑事判决书	0	普通			0	（2017）京0102刑初782号	6	刘忠辉	1975-04-26	完全刑事责任能力	1	42									黑龙江省海林市	黑龙江省宁安市		中国	普通高级中学	2017-08-03	2017-11-20	逮捕	其他存在明确被害人的纠纷						宋思玲		1		北京市首信律师事务所		0	0	0				1
01201_赵某某危险驾驶二审刑事判决书	0		1	0	0	（2016）黑01刑终475号	1	赵某某															黑龙江省哈尔滨市木兰县												李自刚		0		黑龙江朗信银龙律师事务所		0	0	0	0	1	1
01203_邓小兵、刘冬冬等赌博罪一审刑事判决书	0	普通			0	（2018）新4003刑初121号	5	邓小兵	1982-06-10	完全刑事责任能力	1	36	0	0									奎屯市			2018-03-07	2018-06-07	逮捕 拘留							孙境延		0		新疆翰兴律师事务所		0	0	0
01204_邵浩翔、张雷兵、廖春华等敲诈勒索;侵犯公民个人信息一审刑事判决书	0	普通			0	（2019）浙0784刑初358号	8	邵浩翔	1991-03-14	完全刑事责任能力	1	28			汉族			务农		务农		浙江省金华市婺城区	浙江省金华市婺城区		初中	2018-08-10	2019-03-26	逮捕 拘留	不存在明确被害人的纠纷						田利		0		浙江五金律师事务所		0	0	0
01205_陈杰超、鲁俊晓、赵健等组织、领导、参加黑社会性质组织罪一审刑事判决书	0	普通			0	（2018）浙0784刑初1274号	10	陈杰超	1991-07-12	完全刑事责任能力	1	28	1	1	汉族		0					浙江省永康市	浙江省永康市		初中	2018-03-06	2018-11-08	逮捕 拘留	其他存在明确被害人的纠纷						应宇韬	吕菱萍	0	0	浙江五金律师事务所	浙江丽州律师事务所	0	0	0
01206_刘海路故意伤害罪二审刑事判决书	0	普通	1	0	0	（2014）湘高法刑一终字第63号	1	刘海路										务农		务农						2013-01-29		逮捕 监视居住 逮捕 拘留	其他存在明确被害人的纠纷						林小兵		0		湖南纲维律师事务所		0	0	0	0	1	1
01207_事务所律师和事务所律师;郭亮;事务所律师;事务所律师;张秀珍;事务所律师诈骗罪一审刑事判决书	1	普通			0	（2017）甘0111刑初29号	3	王华																		2015-06-23	2016-03-03	逮捕 拘留	其他存在明确被害人的纠纷						高琴	杨军	0	0	甘肃光明律师事务所	甘肃正天合律师事务所	0	0	0
01208_王兆旭犯拒不执行判决、裁定罪一审刑事判决书	0	普通			0	（2018）川0402刑初46号	1	王兆旭	1962-01-20	完全刑事责任能力	1	56			汉族			其他		其他		云南省华坪县	云南省华坪县		高等专科学校	2017-06-15	2018-01-18	逮捕 拘留	不存在明确被害人的纠纷						辛淑芬	吴雪松	0	0	四川极宇律师事务所	四川晓明维序律师事务所	0	0	0
01209_郑某受贿罪一审刑事判决书	0	普通			0	（2018）辽0522刑初1号	1	郑某	1968-07-28	完全刑事责任能力	1	49			汉族			其他		其他			本溪市			2017-09-08	2017-12-15	逮捕 拘留 监视居住	不存在明确被害人的纠纷						于某		0		辽宁恒信（沈阳）律师事务所		0	0	0
01210_金某犯容留他人吸毒罪一审刑事判决书		普通			0	（2016）鲁0214刑初368号	1	金某（英文名K）										其他		其他						2016-04-06	2016-07-20	逮捕 拘留	不存在明确被害人的纠纷												0	0	0
01211_李帝康挪用资金一审刑事判决书	0	普通			0	（2018）粤0883刑初102号	1	李帝康	1971-01-02	完全刑事责任能力	1	47			汉族						广东省湛江市吴川市			中国	普通高级中学			取保候审	其他存在明确被害人的纠纷												0	0	0				1	1
01212_杨某某受贿一审刑事判决书					0	（2015）矿刑初字第76号	1	杨某某	1960-12-27	完全刑事责任能力	1	56			汉族			其他		其他	山西省阳泉市矿区			中国	高等专科学校	2015-01-23		逮捕 拘留							冯俊明	张义龙	0	0	山西众晨律师事务所	山西众晨律师事务所	0	0	0
01213_被告人熊某某犯贩卖毒品罪一审刑事判决书		简易			0	（2017）苏0116刑初700号	1	熊某某	1964-09-06	完全刑事责任能力	1	53			汉族			无业		无业		江苏省南京市	江苏省南京市鼓楼区		初中	2017-07-27	2017-08-25	逮捕 拘留	不存在明确被害人的纠纷												0	0	0
01214_王海富、王海军诈骗、掩饰、隐瞒犯罪所得、犯罪所得收益一审刑事判决书		简易转普通			0	（2018）鲁0792刑初20号	5	王海富	1987-04-21	完全刑事责任能力	1	31			汉族			无业		无业		广西壮族自治区宾阳县			小学	2017-08-04	2018-03-22	逮捕 拘留							董景伟		0		山东齐鲁（潍坊）律师事务所		0	0	0				1
01215_被告人邢龙、符某宗玩忽职守案刑事判决书	1	普通			0	（2014）东刑初字第168号	2	邢龙	1959-02-12	完全刑事责任能力	1	55			汉族			其他		其他					高等专科学校	2014-12-17	2014-09-19	拘留 逮捕	不存在明确被害人的纠纷												0	0	0
01216_叶益棠诈骗一审刑事判决书		普通			0	（2018）桂1102刑初81号	1	叶	1984-09-22	完全刑事责任能力	1	34			汉族			务农		务农		广西壮族自治区贺州市	贺州市八步区		初中	2017-06-27	2018-02-09	拘留 逮捕	其他存在明确被害人的纠纷						黄贤敬		0		广西汇豪律师事务所		0	0	0
01217_姜满凤走私、贩卖、运输、制造毒品罪一审刑事判决书		简易			0	（2018）粤0111刑初2648号	1	姜某凤	1963-05-08	完全刑事责任能力	0	55			汉族								湖南省宁远县		文盲	2018-07-04	2018-10-16	拘留 逮捕	不存在明确被害人的纠纷												0	0	0
01218_徐桂洲、刘高杰故意伤害一审刑事判决书		普通			0	（2017）豫17刑初45号	2	徐桂洲	1992-02-06	完全刑事责任能力	1	25			汉族			务农		务农		河南省上蔡县	上蔡县		初中	2016-06-02		拘留 逮捕	家庭纠纷						贾峰		0		河南华浩律师事务所		0	0	0
01219_王某引诱、容留、介绍卖淫一审刑事判决书		简易			0	（2017）粤1322刑初70号	1	王某	1996-01-25	完全刑事责任能力	1	21			汉族			务工		务工	湖北省荆州市江陵县			中国	初中		2017-01-03	拘留 取保候审	不存在明确被害人的纠纷												0	0	0				1
01220_万立法非法经营一审刑事判决书		普通			0	刑事判决书 （2015）海刑初字第23号	1	万立法	1975-08-04	完全刑事责任能力	1	40			汉族			务工		务工	海拉尔区	内蒙古自治区牙克石市		中国	小学	2014-05-06	2014-12-23	拘留 逮捕	不存在明确被害人的纠纷						陈国新		0		内蒙古乌恩律师事务所		0	0	0				1	1
01221_罗军盗窃罪一审刑事判决书		简易			0	（2014）鄂恩施刑初字第00119号	1	罗军		完全刑事责任能力								务农		务农						2014-12-21	2014-03-25	拘留 逮捕	其他存在明确被害人的纠纷												0	0	0				1
01222_王彦军犯强奸罪一审刑事判决书		普通			0	刑事判决书 （2017）辽0291刑初509号	1	王彦军	1969-05-12	完全刑事责任能力	1	48									黑龙江省抚远市		大连市	中国		2017-08-31	2017-12-12	拘留 逮捕	其他存在明确被害人的纠纷						李剑锋		0		辽宁宏展律师事务所		0	0	0				1
01223_张进国、中国人寿财产保险股份有限公司遵义市中心支公司交通肇事一审刑事判决书		普通			0	（2017）黔0327刑初145号	2	张进国	1978-01-07	完全刑事责任能力	1	39			汉族			务农		务农		贵州省凤冈县	凤冈县		小学	2017-11-13	2017-10-18	取保候审 逮捕							王雪波		1		凤冈县司法局法律援助中心		0	0	1					0
01224_魏飞贩卖毒品一审刑事判决书		简易			0	（2017）沪0112刑初865号	1	魏飞	1979-09-16	完全刑事责任能力	1	38			汉族						安徽省			中国																	0	0	0
01227_余辉、魏国荣等与王世俊非法拘禁罪二审刑事判决书		普通	1		0	（2019）新22刑终41号	6	余辉	1969-08-11	完全刑事责任能力	1	50			汉族								新疆维吾尔自治区哈密市		大学本科	2018-07-17	2018-11-14	逮捕 拘留	其他存在明确被害人的纠纷						杨斌	祁小锐	0	0	新疆方天律师事务所	新疆昆莫律师事务所	0	0	0		1	0
01228_余辉、魏国荣等非法拘禁罪一审刑事判决书		普通			0	刑事判决书 （2018）新2223刑初59号	6	余辉	1969-08-11	完全刑事责任能力	1	50			汉族			无业		无业			新疆维吾尔自治区哈密市		大学本科	2018-07-17	2018-11-14	逮捕 拘留	其他存在明确被害人的纠纷						祁小锐		0		新疆昆莫律师事务所		0	0	0
01229_晏XX犯强奸罪一审刑事判决书		普通			0	（2015）宝刑初字第00237号	1	晏XX	1975-09-24	完全刑事责任能力	1	40			汉族										初中	2015-03-30	2015-05-26	逮捕 拘留	其他存在明确被害人的纠纷												0	0	0				1	1
01230_张少军、秦朝亮寻衅滋事、骗取贷款、票据承兑、金融票证、开设赌场、非法拘禁、敲诈勒索一审刑事判决书					0	（2018）豫0928刑初648号	12	张少军	1990-06-15	完全刑事责任能力	1	28			汉族			无业		无业			河南省濮阳市		初中	2018-04-21	2018-10-30	逮捕 拘留 取保候审 拘留	其他存在明确被害人的纠纷						张现足		0		河南濮兴律师事务所		0	0	0				1
01231_陈海光、赵某甲等寻衅滋事罪，曹某故意伤害罪等一审刑事判决书		普通			0	（2014）舟岱刑初字第63号	7	陈某光					1	1			0	其他		其他						2014-03-20	2014-06-26	逮捕 拘留	不存在明确被害人的纠纷												0	0	0
01233_错红彦寻衅滋事罪一审刑事判决书		普通			0	（2019）吉0822刑初30号	3	错红彦	1978-09-04	完全刑事责任能力	0	41			汉族			务农		务农			通榆县		初中	2018-12-30	2019-02-02	逮捕 拘留	其他存在明确被害人的纠纷						林某		0		吉林巩固律师事务所		0	0	0
01234_李建光、纪士让等滥用职权罪何卫玩忽职守罪一审刑事判决书	1	普通			0	（2017）冀1123刑初26号	4	李建光	1977-11-12	完全刑事责任能力	1	40			汉族			其他		其他	河北省饶阳县	河北省饶阳县	饶阳县	中国	大学本科	2016-04-15	2017-03-17	逮捕 拘留	不存在明确被害人的纠纷						童永强		0		北京市京大律师事务所石家庄分所		0	0	0				1	1
01235_张志刚违法发放贷款罪一审刑事判决书					0	（2018）晋0181刑初67号	1	张志刚	1974-11-10	完全刑事责任能力	1	44			汉族			其他		其他		古交市	古交市		大学本科	2018-01-17	2018-08-16	逮捕 拘留	其他存在明确被害人的纠纷						安巍	王金	0	0	山西乾宁律师事务所	山西乾宁律师事务所	0	0	0				1	1
01236_周琴贩卖毒品一审刑事判决书		简易			0	（2018）渝0106刑初222号	1	周琴	1975-10-01	完全刑事责任能力	0	43	1	1	汉族		1	无业		无业					初中		2018-03-01	监视居住													0	0	0
01237_李文、向忠翔寻衅滋事、非法拘禁一审刑事判决书		普通			0	（2018）鄂1281刑初163号	7	李文	1989-09-14	完全刑事责任能力	1	29			汉族			无业		无业			赤壁市		初中	2017-12-15	2018-06-01	逮捕 拘留							湖北君泽律师事务所		0		湖北君泽律师事务所		0	0	0				1	1
01238_张尚武诈骗一审刑事判决书					0	（2016）吉0104刑初781号	1	张尚武			1										吉林省松原市宁江区			中国		2015-12-11	2016-08-08	逮捕 拘留	其他存在明确被害人的纠纷						刘文玉		0		吉林吉大律师事务所		0	0	0
01239_万某某与唐某某、唐某某、郑某某销售假冒注册商标的商品罪2015刑初398一审刑事判决书					0	（2015）穗越法刑初字第398号	4	万某		完全刑事责任能力											广西壮族自治区藤县	广西壮族自治区藤县		中国		2014-08-14	2015-02-03	逮捕 拘留	不存在明确被害人的纠纷						陈始土	卿爱国	0	0	广东凯成律师事务所	广东中泽律师事务所	0	0	0				1
01240_黄厚义、杨威等寻衅滋事一审刑事判决书		简易			0	（2019）沪0112刑初2144号	3	黄厚义	1989-05-01	完全刑事责任能力	1	30			汉族						安徽省霍邱县			中国			2019-10-11								项荣磊		0		上海市国雄律师事务所		0	0	0				1	1
01241_汪文阳玩忽职守罪一审刑事判决书		普通			0	（2014）杭富刑初字第692号	1	汪文阳	1970-08-21	完全刑事责任能力	1	46			汉族			其他		其他	杭州市富阳区	杭州市富阳区		中国	高等专科学校		2014-10-13	取保候审							冯宇钦		0		浙江乾道律师事务所		0	0	0				1
01242_刘林、董志学、孙伟伟、冯某某、孙某某、路某开设赌场、非法拘禁、敲诈勒索涉恶一案一审刑事判决书		普通			0	（2018）鲁0685刑初456号	6	刘林	1983-09-26	完全刑事责任能力	1	36										山东省招远市					2018-12-10		其他存在明确被害人的纠纷												0	0	0				1
01243_胡建军、胡军峰等寻衅滋事罪一审刑事判决书	1	普通			0	（2019）甘1025刑初60号	5	胡建军	1965-09-13	完全刑事责任能力	1	54			汉族			务农		务农			宁县		文盲	2018-10-19	2019-07-18	逮捕 拘留	不存在明确被害人的纠纷						高洋		0		甘肃北斗律师事务所		0	0	0
01244_江建荣、郑某1组织、领导、参加黑社会性质组织再审刑事判决书		普通	1		0	刑事判决书 （2018）赣06刑再1号	1	江建荣	1971-12-26	完全刑事责任能力	1	47			汉族			无业		无业			贵溪市		初中	2009-08-07	2017-11-15	逮捕													0	0	0		1
01245_张义贵贩卖毒品一审刑事判决书		简易			0	刑事判决书 （2016）闽0111刑初641号	1	张义贵	1967-10-15	完全刑事责任能力	1	49			汉族			务工		务工	湖北省武穴市	湖北省武穴市	福州市马尾区	中国	初中	2016-09-02	2016-11-03	逮捕 拘留	不存在明确被害人的纠纷												0	0	0
01246_何某某、赵某某非法拘禁一审刑事判决书					0	刑事附带民事判决书 （2018）辽0792刑初54号	7	何某某	1974-02-13	完全刑事责任能力	0	44			汉族			其他		其他	辽宁省锦州市古塔区	辽宁省锦州市	锦州市	中国	大学本科	2018-03-15		逮捕 拘留	其他存在明确被害人的纠纷						苏某某	房某某	0	0	辽宁锦逸律师事务所	辽宁山嵩律师事务所	0	0	0
01247_张建军滥用职权二审刑事判决书		普通	1		0	（2014）郑刑一终字第376号	1	张某某	1977-07-30	完全刑事责任能力	1	37			汉族			其他		其他						2014-05-23		逮捕 拘留	不存在明确被害人的纠纷												0	0	0		1	0
01248_王凯等寻衅滋事一审刑事判决书					0	刑事判决书 （2018）京0118刑初301号	3	王浩	1988-12-05	完全刑事责任能力	1	30			汉族			其他		其他	北京市密云区	北京市	北京市密云区	中国	普通高级中学	2018-04-04	2018-11-12	逮捕 拘留	其他存在明确被害人的纠纷						张策		0		北京君宪律师事务所		0	0	0				1
01249_郭治杨、郭俊磊涉黑刑事判决书			1		0	（2014）郑刑二终字第116号	2	郭治杨		完全刑事责任能力	1	30			汉族											2013-06-29		逮捕 拘留	不存在明确被害人的纠纷						孟凯		0		河南郑韩大有律师事务所		0	0	0		1	0
01250_张光伟、王文科、韩涛、袁文锋参加黑社会性质组织、故意伤害、寻衅滋事、聚众斗殴、敲诈勒索、强迫交易、聚众扰乱社会秩序、非法拘禁一案一审刑事判决书		普通			0	（2012）渑刑初字第68号	4	张光伟	1986-03-23	完全刑事责任能力	1	27														2012-07-09	2012-03-21	逮捕 取保候审													0	0	0
01251_未某、孟某赌博、非法拘禁二审刑事判决书	1		1		0	（2012）六刑终字第00174号	2	未某	1979-11-02	完全刑事责任能力	1	33			汉族			务农		务农			安徽省霍邱县		小学	2012-09-25		逮捕 取保候审 拘留	不存在明确被害人的纠纷						田永	邓传红	0	0	安徽大鸣律师事务所	安徽大鸣律师事务所	0	0	0		1		1	1
01252_翟卫国、刘磊等非法拘禁罪、寻衅滋事罪等一审刑事判决书		普通			0	（2019）苏0206刑初275号	3	翟卫国	1983-06-02	完全刑事责任能力	1	36			汉族			务工		务工	无锡市惠山区			中国	中专（包括职业高中，中等专业学校，技工学校）	2018-09-30	2019-06-12	逮捕 监视居住 拘留							曹平		0		江苏润远律师事务所		0	0	0
01253_王建生、归水芳、徐飞等非法拘禁罪一审刑事判决书		普通			0	（2019）浙0411刑初334号	6	王建生	1972-02-23	完全刑事责任能力	1	47			汉族						浙江省嘉兴市秀洲区			中国	初中	2018-09-30	2019-06-05	拘留 逮捕							俞琦	孙姚骏	0	0	浙江浙博律师事务所	浙江泰豪律师事务所	0	0	0				1
01254_被告人朱某犯非法经营罪一审刑事判决书		普通			0	（2014）晋刑初字第1086号	1	朱某										务农		务农						2014-04-29	2014-04-28	逮捕 取保候审 拘留	不存在明确被害人的纠纷												0	0	0
01255_王成钢受贿、行贿案一审刑事判决书		普通			0	（2014）芒刑初字第102号	1	王成钢	1963-11-11	完全刑事责任能力	1	51			彝族			其他		其他			瑞丽市		大学本科	2014-01-24	2014-06-20	逮捕 拘留	不存在明确被害人的纠纷						段亚元		0		云南立建律师事务所		0	0	0				1	1
01256_黄家林非法持有、私藏枪支、弹药一审刑事判决书		简易			0	（2016）桂1002刑初80号	1	黄家林			1		1	1	汉族		0	务农		务农						2015-12-24	2016-03-24	逮捕	不存在明确被害人的纠纷						黄光铭		0		广西桂百律师事务所		0	0	0
01257_张学科等合同诈骗一审刑事判决书					0	（2019）京01刑初37号	2	张学科	1969-08-26	完全刑事责任能力	1	50			汉族			其他		其他	湖南省湘阴县	湖南省岳阳市		中国	高等专科学校	2018-09-08	2019-06-12	逮捕	其他存在明确被害人的纠纷						王成		0		北京宝辰律师事务所		0	0	0
01258_于洪光故意伤害一审刑事判决书		普通		1	0	（2018）黑0103刑初558号	1	于洪光	1961-12-06	完全刑事责任能力	1	57			汉族			无业		无业		黑龙江省哈尔滨市	黑龙江省哈尔滨市南岗区		初中	2017-03-15	2017-04-05	逮捕 取保候审 拘留	家庭纠纷						邹文静		0		黑龙江畅顺达律师事务所		0	0	0
01259_张梁梁参加黑社会性质组织一审刑事判决书					0	（2014）沁刑初字第00282号	1	张梁梁	1987-10-14	完全刑事责任能力	1	37			汉族			无业		无业		沁阳市				2014-07-18	2014-11-17	逮捕 拘留													0	0	0
01260_陈川诈骗一审刑事判决书		普通			0	（2019）津0105刑初137号	1	陈川	1984-04-30	完全刑事责任能力	1	35			汉族			无业		无业	天津市和平区	天津市	天津市西青区	中国	大学本科	2018-10-29	2019-03-25	逮捕 拘留							狄妍		0		天津孚惠律师事务所		0	0	0				1
01261_102刘益彬故意伤害罪一审刑事判决书					0	（2018）苏03刑初102号	1	刘益彬	1962-08-20	完全刑事责任能力		57						务农		务农			江苏省睢宁县			2018-02-14	2018-10-09	拘留 逮捕	其他存在明确被害人的纠纷						李亮		0		江苏熊运栋律师事务所律师		0	0	0				1	1
01262_陈君华走私、贩卖、运输、制造毒品一审刑事判决书					0	（2018）沪0106刑初524号	1	陈君华	1961-12-15	完全刑事责任能力	1	57	1	1	汉族						上海市静安区		上海市静安区	中国			2018-05-03		不存在明确被害人的纠纷												0	0	0
01263_李春朋危险驾驶罪一审刑事判决书		简易			0	（2018）吉0722刑初44号	1	李春朋	1994-04-01	完全刑事责任能力	1	24			汉族			务农		务农	吉林省长岭县		长岭县	中国	初中		2018-02-06		其他存在明确被害人的纠纷												0	0	0
01264_何勇、孙乐乐强奸、非法拘禁、寻衅滋事一审刑事判决书					0	（2018）晋0729刑初90号	5	何勇	1987-04-23	完全刑事责任能力	1	31			汉族			无业		无业		山西省灵石县			初中	2018-05-23	2018-08-15	拘留 逮捕	其他存在明确被害人的纠纷						李武生				山西天石律师事务所		0	0	0
01265_夏某走私珍贵动物制品罪一审刑事判决书					0	（2013）穗中法刑二初字第127号	1	夏某	1970-08-15	完全刑事责任能力	1	43			汉族							山东省泗水县			初中	2013-05-23		拘留 逮捕	不存在明确被害人的纠纷												0	0	0
01266_宋修雷妨害公务罪一审刑事判决书					0	（2017）京0108刑初47号	1	宋修雷	1981-04-07	完全刑事责任能力	1	36			汉族						北京市海淀区	山东省莱阳市		中国	硕士研究生		2017-01-04	取保候审	不存在明确被害人的纠纷						任若飞、包澈力格尔				北京盈科（天津）律师事务所		0	0	0
01267_秦海照等诈骗一审刑事判决书		普通			0	（2019）京0113刑初1060号	2	刘汉永	1988-02-12	完全刑事责任能力	1	31			汉族			无业		无业	山西省吕梁市	山西省		中国	初中	2019-07-02	2019-10-10	拘留 逮捕	其他存在明确被害人的纠纷						孙振杰		1		北京市青天律师事务所		0	0	0				1
01268_练少飞强奸一审刑事判决书					0	（2017）粤1302刑初151号	1	练少飞	1982-09-09	完全刑事责任能力	1	35	1	1	汉族			无业		无业	广东省汕尾市陆河县			中国	小学	2016-01-15	2017-02-08	逮捕 拘留	其他存在明确被害人的纠纷						章利兵	曾望文			广东卓凡（仲恺）律师事务所	广东卓凡（仲恺）律师事务所	0	0	0	1
01269_许卫军非法拘禁罪、寻衅滋事罪等二审刑事判决书			1		0	（2017）苏06刑终256号	4	许卫军	1974-09-14	完全刑事责任能力	1	43			汉族			其他		个体经营			江苏省南京市江宁区		小学	2015-10-23		拘留 逮捕	其他存在明确被害人的纠纷						韩霞	顾爱娟			上海知谦律师事务所	上海知谦律师事务所	0	0	0
01270_李业、周承新寻衅滋事一审刑事判决书		普通			0	（2016）桂0421刑初21号	7	李业	1992-08-04	完全刑事责任能力	1	24			汉族			务农		务农			广西省苍梧县		小学	2015-06-04		拘留 逮捕	不存在明确被害人的纠纷												0	0	0				1
01271_赵文梅、赵文生等假冒注册商标罪一审刑事判决书					0	（2019）晋0109刑初204号	3	赵文梅	1977-04-04	完全刑事责任能力	0	42			汉族			其他		个体	山西省文水县	山西省文水县	山西省太原市	中国	初中	2018-09-03	2019-03-04	取保候审 逮捕 拘留	其他存在明确被害人的纠纷						张玉超				山西弘韬（阳曲）律师事务所		0	0	0				1	1
01272_何小风运输毒品罪一审刑事判决书					0	（2015）宣汉刑初字第122号	1	何小风		完全刑事责任能力	1	32			汉族			无业		无业	四川省宣汉县			中国		2015-04-08	2015-07-03	拘留 逮捕	不存在明确被害人的纠纷						秦锐				四川聚鑫律师事务所		0	0	0
01273_郭泽元受贿一审刑事判决书					0	（2014）安刑初字第76号	1	郭泽元	1966-07-01	完全刑事责任能力	1	48			汉族			其他		安乡县政协原副主席，安乡县住房和城乡建设局（以下简称安乡县住建局）原副局长			湖南省安乡县		大学本科	2013-12-25	2014-06-25	逮捕 监视居住	不存在明确被害人的纠纷						戴红杰				湖南信义律师事务所		0	0	0
01274_孟尹菊盗窃一审刑事判决书					0	（2018）沪0117刑初285号	1	孟尹菊	1996-06-16	完全刑事责任能力	0	22			汉族						安徽省			中国			2018-02-22		其他存在明确被害人的纠纷						颜美星		1		上海昌鑫律师事务所		0	0	0				1
01275_王海龙、王蕾组织、领导、参加黑社会性质组织、寻衅滋事、故意伤害、开设赌场、非法拘禁、敲诈勒索、合同诈骗、强迫交易、非法采矿、窝藏、包庇、抢劫一审刑事判决书					0	（2018）鲁1326刑初207号	7	王海龙	1977-09-30	完全刑事责任能力	1	41			汉族						山东省兰陵县	山东省兰陵县	山东省平邑县	中国	初中	2017-05-20	2018-04-28	逮捕 逮捕	其他存在明确被害人的纠纷						张燕宗	林化灯			山东舜翔（临沂）律师事务所	北京市同硕律师事务所	0	0	1
01276_李成民危险驾驶一审刑事判决书		简易			0	（2019）鲁0921刑初531号	1	李成民	1975-05-12	完全刑事责任能力	1	44	1	1	汉族							山东省宁阳县	山东省宁阳县		初中		2019-11-28	拘留 取保候审	不存在明确被害人的纠纷												0	0	0				1
01277_池迎新放火一审刑事判决书		简易			0	（2018）京0119刑初31号	1	池迎新	1984-07-01	完全刑事责任能力	1	34										北京市延庆区				2018-01-12	2018-02-12	逮捕 拘留	不存在明确被害人的纠纷												0	0	0				1
01279_胡增龙寻衅滋事一审刑事判决书					0	（2018）粤1972刑初193号	1	胡增龙																		2017-10-18	2018-01-09	拘留 逮捕	其他存在明确被害人的纠纷												0	0	1				1
01280_李清贵犯假冒注册商标罪一审刑事判决书					0	（2014）赤刑知初字第1号	1	李清贵					1	1				其他		个体工商户		内蒙古宁城县	内蒙古宁城县			2013-07-26	2014-02-10	拘留 逮捕	不存在明确被害人的纠纷						门凤萍				内蒙古大宁律师事务所		0	0	0
01281_邱某犯非法拘禁罪一审刑事判决书					0	（2017）鲁0705刑初248号	1	邱某										其他		个体						2017-05-12	2017-08-03	拘留 逮捕	其他存在明确被害人的纠纷						王靖				山东国宗（诸城）律师事务所		0	0	0
01282_吴三杰危险驾驶罪一审刑事判决书					0	（2016）内0105刑初494号	1	吴三杰										无业		无业		内蒙古自治区呼和浩特市	内蒙古自治区呼和浩特市		普通高级中学			取保候审													0	0	0				1
01283_王某某非法制造、买卖、运输、邮寄、储存枪支、弹药、爆炸物罪一审刑事判决书					0	（2013）无刑初字第00086号	1	王某某																		2013-06-28			不存在明确被害人的纠纷						司某某				河北北华律师事务所		0	0	0				1
01284_周科、郝帆侵犯公民个人信息一审刑事判决书					0	（2018）粤0303刑初905号	2	周科	1980-06-04	完全刑事责任能力	1	38			汉族			其他		深圳市柏川金服科技有限公司（股东）	广东省深圳市龙华区			中国	大学本科	2017-12-26	2018-05-28	拘留 逮捕	不存在明确被害人的纠纷						宋子雄				广东新东方师事务所		0	0	0
01285_雷冰青、周文雅开设赌场罪一审刑事判决书		普通			0	（2019）浙0382刑初428号	2	雷冰青	1987-10-11	完全刑事责任能力	0	32			畲族			其他		经商	浙江省乐清市	浙江省乐清市		中国	初中	2018-07-12		拘留 逮捕	不存在明确被害人的纠纷						赵元元	金龙贵			江航英律师事务所	江航英律师事务所	0	0	0				1
01286_李保利犯参加黑社会性质组织、寻衅滋事罪、敲诈勒索罪、破坏生产经营一案一审刑事判决书					0	（2012）中刑初字第453号	1	李保利		完全刑事责任能力	1	30														2012-07-18	2012-10-26	拘留 逮捕	其他存在明确被害人的纠纷						王某某	蒋某某			金博大律师事务所	金博大律师事务所	0	0	0
01287_牛某、满某等强迫交易罪一审刑事判决书					0	（2019）内0125刑初16号	5	牛某										其他		个体		内蒙古自治区乌兰察布卓资县	内蒙古自治区呼和浩特市赛罕区		中专（包括职业高中，中等专业学校，技工学校）	2018-11-16	2019-04-15	拘留 逮捕	其他存在明确被害人的纠纷						张伟建	宫树林					0	0	0				1
01288_高国胜贪污罪二审刑事判决书			1		0	（2017）晋刑终127号	1	高国胜	1965-06-02	完全刑事责任能力	1	52			汉族			其他		中铁武汉电气化局集团有限公司工作		湖北省武汉市	湖北省武汉市洪山区		大学本科	2015-12-14		逮捕	其他存在明确被害人的纠纷												0	0	0
01289_纪某某赌博一审刑事判决书		简易			0	（2014）浦刑初字第4453号	1	纪某某																			2014-09-26		不存在明确被害人的纠纷						曹镇年				上海申海律师事务所		0	0	0				1
01290_王建军拒不执行判决、裁定一审刑事判决书					0	（2018）豫0603刑初172号	1	王建军	1977-02-25	完全刑事责任能力	1	41			汉族			其他		原河南万丰农林设备有限公司法定代表人、总经理	河南省鹤壁市浚县		河南省鹤壁市淇滨区	中国	小学	2018-07-16	2018-10-25	逮捕	不存在明确被害人的纠纷						马磊				河南谦荣律师事务所		0	0	0
01291_龚某某诈骗罪一审刑事判决书					0	（2015）河城法刑初字第424号	1	龚某某	1974-12-07	完全刑事责任能力	1	41			汉族										小学	2015-07-13	2015-09-25	拘留 逮捕	其他存在明确被害人的纠纷						黄国平				广东法开律师事务所		0	0	0					1
01292_孟吟、张书军等组织、领导、参加黑社会性质组织罪、非法拘禁罪等王磊、楚善中组织、领导、参加黑社会性质组织罪、非法拘禁罪杨高扬组织、领导、参加黑社会性质组织罪冯军非法拘禁罪一审刑事判决书					0	（2018）皖0422刑初371号	7	孟吟	1989-11-02	完全刑事责任能力	1	25			汉族			务工		国营寿西湖农场职工	安徽省寿县		安徽省寿县	中国	中专（包括职业高中，中等专业学校，技工学校）	2018-04-13	2018-10-16	逮捕 拘留	其他存在明确被害人的纠纷						孙克林				安徽寿州律师事务所		0	0	0
01293_武明诈骗一审刑事判决书					0	（2018）京02刑初84号	1	武明	1978-09-01	完全刑事责任能力	1	40														2017-11-20	2018-08-16	逮捕	其他存在明确被害人的纠纷						罗志勇	熊勇			北京市维泰律师事务所	北京市炜衡律师事务所	0	0	0
01294_原审被告人张晓某犯交通肇事罪二审刑事判决书			1		0	（2015）运中刑一终字第52号	1	张晓某	1989-09-24	完全刑事责任能力	0	26			汉族						山西省万荣县			中国	中专（包括职业高中，中等专业学校，技工学校）	2013-10-25		逮捕	其他存在明确被害人的纠纷												0	0	1					1
01295_陈志亮、曹漩、陈键等寻衅滋事罪一审刑事判决书					0	（2018）新0104刑初1104号	7	陈志亮	1989-12-01	完全刑事责任能力	1	29			汉族							新疆维吾尔自治区吉木萨尔县		中国	大学本科		2018-12-24		其他存在明确被害人的纠纷						张代曾				新疆思睿律师事务所		0	0	0
01297_武燕军、宋海洋等与温家俊、方旭光等寻衅滋事罪二审刑事判决书			1		0	（2019）内03刑终25号	12	武燕军	1978-02-11	完全刑事责任能力	1	41			汉族			无业		无业	乌兰察布市	乌兰察布市	乌海市海勃湾区	中国	小学	2018-03-06		拘留 逮捕	其他存在明确被害人的纠纷						张艳红				宁夏天合律师事务所		0	0	0
01298_邓志高、阳连华非国家工作人员受贿二审刑事判决书			1		0	（2016）粤19刑终579号	2	邓志高	1968-02-15	完全刑事责任能力	1	48			汉族			其他		东莞市翔运集团有限公司第一分公司飞龙车队负责人	湖南省沅江市			中国	初中	2015-01-07		拘留 逮捕	不存在明确被害人的纠纷						何飞	陈海山			广东华文律师事务所	广东华文律师事务所	0	0	0
01299_(最高)孙宝国、孙宝东故意伤害罪审判监督刑事判决书					0	（2016）最高法刑再2号	7	孙宝国	1972-10-22	完全刑事责任能力	1	44			汉族			其他		长春市凯旋路钢材市场业主		吉林省长春市	吉林省长春市		初中	2009-04-30		逮捕 监视居住 拘留	其他存在明确被害人的纠纷						赵新宙	张立军			北京天驰君泰律师事务所	北京天驰君泰律师事务所	0	0	0
01300_姚本林、刘晓红开设赌场、赌博、寻衅滋事一审刑事判决书					0	（2018）黔2626刑初105号	5	姚本林	1974-05-23	完全刑事责任能力	1	44			汉族			无业		无业			贵州省岑巩县		初中	2018-02-12	2018-11-13	拘留 逮捕	不存在明确被害人的纠纷						王凯				贵州存正律师事务所		0	0	0
01301_曹高峰强奸罪一审刑事判决书					0	（2013）相刑初字第0004号	1	曹高峰	1972-04-23	完全刑事责任能力	1	41			汉族			无业		无业						2017-06-10	2012-12-21	拘留 取保候审 逮捕	其他存在明确被害人的纠纷												0	0	0
01302_陈德福危险驾驶一审刑事判决书		简易			0	（2017）皖1302刑初491号	1	陈德福	1969-10-11	完全刑事责任能力	1	48			汉族			务工		宿州市环境管理处聘用人员		安徽省宿州市	安徽省宿州市埇桥区		初中		2017-06-14	拘留 取保候审	不存在明确被害人的纠纷												0	0	0				1	1
01303_被告人郭某某伪造公司印章一案一审刑事判决书					0	（2016）吉0202刑初292号	1	郭某某													吉林省九台市人			中国		2015-06-02	2016-06-02	取保候审 逮捕	不存在明确被害人的纠纷						金春生				吉林越天律师事务所		0	0	0
01304_张利夕危险驾驶一审刑事判决书					0	（2017）鲁1083刑初394号	1	张利夕	1966-01-19	完全刑事责任能力	1	51						务农		务农	山东省乳山市		山东省乳山市	中国	初中		2017-12-15	取保候审	不存在明确被害人的纠纷												0	0	0
01305_李占果、侯敬刚诈骗罪一审刑事判决书					0	（2019）皖1322刑初136号	2	李占果	1971-08-10	完全刑事责任能力	1	48			汉族						江苏省无锡市惠山区	安徽省萧县		中国	小学	2018-10-15	2019-04-18	逮捕	其他存在明确被害人的纠纷						戴军				徽汇龙律师事务所		0	0	0
01306_方某等走私国家禁止进出口的货物、物品罪一审刑事判决书					0	（2018）吉05刑初7号	7	方某	1972-08-08	完全刑事责任能力	1	46			朝鲜族			其他		丹东市成部贸易有限公司法定代表人	辽宁省丹东市元宝区		辽宁省丹东市元宝区	中国	普通高级中学	2017-12-22	2018-07-19	取保候审 逮捕 拘留	不存在明确被害人的纠纷												0	0	0
01307_陈志刚洗钱罪一审刑事判决书					0	（2016）浙0305刑初122号	1	陈志刚	1993-04-18	完全刑事责任能力	1	23			汉族			务工		务工		浙江省温州市	浙江省温州市洞头区		高等专科学校			拘留 取保候审	不存在明确被害人的纠纷						王钰				浙江越人律师事务所		0	0	0				1
01309_李丁、李松等诈骗一审刑事判决书		简易转普通			0	（2017）沪0117刑初1224号	3	李丁	1987-03-23	完全刑事责任能力	1	30			汉族						安徽省阜阳市			中国			2017-08-16		其他存在明确被害人的纠纷						苏秀萍				上海昌鑫律师事务所		0	0	0
01310_史某走私、贩卖、运输、制造毒品一审刑事判决书		简易			0	（2018）沪0110刑初165号	1	史某	1970-08-10	完全刑事责任能力	1	47	1	1	汉族								上海市杨浦区				2018-03-05		不存在明确被害人的纠纷												0	0	0				1
01311_王某交通肇事罪一审刑事判决书 2		简易			0	（2014）交刑初字第14号	1	王某	1985-05-23	完全刑事责任能力	1	29			汉族			务农		务农					初中		2014-01-03	拘留 取保候审													0	0	0				1	1
01312_被告人秦杰犯交通肇事罪一审刑事判决书					0	（2016）新0202刑初10号	1	秦杰	1984/9/0	完全刑事责任能力	1	32			汉族								新疆维吾尔自治区克拉玛依市			2016-02-26	2016-03-29	拘留 逮捕	其他存在明确被害人的纠纷						葛咏红				新疆天策律师事务所		0	0	1				1
01313_杨安乐贩卖毒品罪一审刑事判决书		简易			0	（2016）渝0105刑初1318号	1	杨安乐	1979-10-12	完全刑事责任能力	1	37			汉族			无业		无业	重庆市江北区	重庆市江北区		中国	中专（包括职业高中，中等专业学校，技工学校）	2016-11-18	2016-11-25	拘留 逮捕	不存在明确被害人的纠纷												0	0	0				1
01314_王×非法持有、私藏枪支、弹药罪一审刑事判决书		简易			0	（2014）石刑初字第360号	1	王×	1985-09-14	完全刑事责任能力	1	29														2014-06-27	2014-09-26	拘留 逮捕	不存在明确被害人的纠纷												0	0	0				1	1
01315_王红哲故意杀人二审刑事判决书			1		0	（2015）赣刑一终字第19号	1	王红哲										无业		无业						2014-04-01		拘留 逮捕	其他存在明确被害人的纠纷						丁辉		1		江西秦风律师事务所		0	0	0
01316_陈甲明走私、贩卖、运输、制造毒品一审刑事判决书		简易转普通			0	（2018）湘0181刑初55号	1	陈甲明	1972-05-24	完全刑事责任能力	1	46			汉族			务农		务农		湖南省浏阳市	湖南省浏阳市		小学		2018-01-17	拘留 监视居住	不存在明确被害人的纠纷												0	0	0
01317_崔振中贪污案二审刑事判决书			1		0	（2013）云高刑终字第37号	1	崔振中	1960-04-09	完全刑事责任能力	1	53			汉族										硕士研究生	2012-05-29		拘留 逮捕	不存在明确被害人的纠纷						纪云波				云南云之南律师事务所		0	0	0
01318_杨春壮强奸罪一审刑事判决书					0	（2018）吉0183刑初439号	1	杨春壮	1994-04-19	完全刑事责任能力	1	24			汉族			务农		务农	吉林省德惠市	吉林省德惠市		中国	小学	2018-07-10	2018-10-08	拘留 逮捕													0	0	0
01319_王翀峰危险驾驶一审刑事判决书		简易			0	（2016）内0105刑初163号	1	王翀峰	1989-08-16	完全刑事责任能力	1	27			汉族			无业		无业		内蒙古自治区呼和浩特市	内蒙古自治区呼和浩特市玉泉区		中专（包括职业高中，中等专业学校，技工学校）			拘留 取保候审													0	0	0
01320_李月盟污染环境一审刑事判决书					0	（2019）皖0506刑初6号	1	李月盟	1968-01-11	完全刑事责任能力	1	51			汉族			其他		马鞍山市宁胜达机械制造厂投资人		安徽省当涂县	安徽省马鞍山市博望区		初中		2018-12-27	取保候审	不存在明确被害人的纠纷												0	0	1				1	1
01321_郭某、兰永涛等犯抢劫罪、非法拘禁罪二审刑事判决书					0	（2015）临刑二终字第159号	3	郭某					1	1				其他		个体业主						2014-05-30		拘留 逮捕	其他存在明确被害人的纠纷												0	0	0
01322_张某危险驾驶罪一审刑事判决书		普通			0	（2018）浙0483刑初197号	1	张某	1989-11-12	完全刑事责任能力	1	29			壮族			无业		无业	云南省砚山县			中国	初中		2018-02-28	取保候审	不存在明确被害人的纠纷												0	0	0
01323_蔡某强奸一审刑事判决书					0	（2016）豫1402刑初289号	1	蔡某																			2016-07-01		其他存在明确被害人的纠纷						葛建平	谢明卫			河南旺达律师事务所	河南旺达律师事务所	0	0	0				1
01324_姜孝忠国家机关工作人员签订、履行合同失职被骗罪一审刑事判决书	1				0	（2016）湘1381刑初81号	1	姜孝忠	1961-06-05	完全刑事责任能力	1	54			汉族			其他		华新水泥（冷水江）项目建设协调服务办公室工作人员	湖南省冷水江市		湖南省冷水江市	中国	大学本科		2016-07-12	取保候审 监视居住							杨平玲				湖南湘都律师事务所		0	0	0
01325_何妹故意杀人一审刑事判决书					0	（2016）闽0803刑初244号	1	何妹			0				汉族			务农		务农			广西壮族自治区		初中	2016-02-26	2016-07-26		家庭纠纷												0	0	0				1
01326_自诉人广大建设集团有限公司诉被告人胡洪永犯拒不执行判决、裁定一审刑事判决书					1	（2017）苏0312刑初798号	1	胡洪永	1963-01-16	完全刑事责任能力	1	54			汉族			其他		个体			江苏省徐州市鼓楼区		普通高级中学	2017-10-19	2017-09-22	逮捕	不存在明确被害人的纠纷						冯茂蔚				江苏安珀志律师事务所		0	0	0				1
01327_周某走私、贩卖、运输、制造毒品一审刑事判决书		简易			0	（2018）沪0104刑初1034号	1	周某			1				汉族								上海市				2018-11-29		不存在明确被害人的纠纷						徐月英		1		上海市嘉华律师事务所		0	0	0
01329_王燕军、白雪盗窃一审刑事判决书		速裁			0	（2018）豫0811刑初138号	2	王燕军	1977-12-07	完全刑事责任能力	1	41	1	1	汉族			无业		无业			河南省焦作市山阳区		小学以下	2017-12-08	2018-03-07	逮捕													0	0	0				1
01330_王某某危险驾驶罪刑事判决书					0	（2014）凤刑初字第00253号	1	王某某			1																2014-09-22	取保候审	不存在明确被害人的纠纷												0	0	0
01331_（2014）神刑初字第00389号 核对					0	（2014）神刑初字第00389号	1	李某某	1995-03-17	完全刑事责任能力	1	19			汉族			无业		无业					初中	2013-10-25	2014-04-30	拘留 逮捕	其他存在明确被害人的纠纷												0	0	0
01332_（2015）晋刑初字第00213号 核对					0	（2015）晋刑初字第00213号	2	孙某		完全刑事责任能力																2015-09-04	2015-10-19	拘留 逮捕	不存在明确被害人的纠纷												0	0	0
01333_（2015）牙刑初字第301号 核对		普通			0	（2015）牙刑初字第301号	2	高某某	1965-07-24	完全刑事责任能力	1	51			汉族			务工		务工		山东省章丘区	内蒙古自治区呼伦贝尔市		普通高级中学	2015-08-28	2015-12-24	拘留 逮捕	其他存在明确被害人的纠纷						王树明	徐建国			内蒙古敖森律师事务所律师	内蒙古铁源律师事务所律师	0	0	1
01334_（2015）鄂青山刑初字第00004号 核对		普通			0	（2015）鄂青山刑初字第00004号	3	姚华										其他		主任						2014-01-17	2014-12-22	拘留 逮捕	不存在明确被害人的纠纷						邓文洲	杨春			湖北静海律师事务所	湖北谦顺律师事务所	0	0	0
01336_（2017）鄂0117刑初400号 核对					0	（2017）鄂0117刑初400号	1	金保明	1965-09-02	完全刑事责任能力	1	53			汉族			其他		党总支书记		武汉市新洲区	武汉市新洲区		高等专科学校	2017-05-31	2017-08-22	拘留 逮捕 取保候审	其他存在明确被害人的纠纷						潘正东	李涛			湖北佑君律师事务所	湖北维力律师事务所	0	0	0
01337_（2018）辽02刑初56号 核对					0	（2018）辽02刑初56号	1	郭晓书	1962-11-05	完全刑事责任能力	1	56		1	汉族			无业		无业	辽宁省大连市甘井子区			中国	初中		2018-04-04	拘留 取保候审	不存在明确被害人的纠纷						武炳兰				辽宁炳心律师事务所		0	0	0				1		1
01338_（2018）苏0707刑初307号 核对		简易			0	（2018）苏0707刑初307号	1	郑智康	1993-03-04	完全刑事责任能力	1	25	1	1	汉族		0				连云港市赣榆区		连云港市赣榆区	中国	小学	2018-05-24	2018-07-02	拘留 逮捕	其他存在明确被害人的纠纷						李治国		1		江苏榆和律师事务所		0	0	0
01339_（2018）鲁1083刑初90号 核对					0	（2018）鲁1083刑初90号	1	常某某	1963-05-09	完全刑事责任能力	1	55			汉族			其他		个体司机	山东省乳山市	山东省乳山市	山东省乳山市	中国	小学		2018-03-17	取保候审	其他存在明确被害人的纠纷												0	0	0
01340_（2015）郑刑再终字第8号				1	0	（2015）郑刑再终字第8号	7	乔晓军	1970-08-08	完全刑事责任能力	1	45			汉族											2015-10-17		逮捕	其他存在明确被害人的纠纷						时永涛	吴强			河南长顺律师事务所	河南长顺律师事务所	0	0	0		1		1
01341_（2018）渝0118刑初316号 核对		简易			0	（2018）渝0118刑初316号	1	杨文川	1976-09-23	完全刑事责任能力	1	42	1	1	汉族		0	无业		无业		重庆市永川区			初中	2018-06-08	2018-05-30	逮捕	其他存在明确被害人的纠纷												0	0	0
01342_（2018）鄂0582刑初30号 核对					0	（2018）鄂0582刑初30号	2	俞邦友	1965-11-30	完全刑事责任能力	1	53			土家族			其他		医院院长		湖北省利川市	利川市		大学本科	2017-01-20	2018-01-25	拘留 逮捕	不存在明确被害人的纠纷						刘箭	陈云飞			湖北立丰律师事务所	湖北楚雄律师事务所	0	0	0				1
01343_（2017）鄂0116刑初356号 核对		简易			0	（2017）鄂0116刑初356号	1	朱某某	1984-04-05	完全刑事责任能力	1	33			汉族			务工		务工			武汉市黄陂区		初中	2017-03-30	2017-05-24	拘留 逮捕	不存在明确被害人的纠纷												0	0	0
01344_（2017）辽0502刑再3号 核对			0	1	0	（2017）辽0502刑再3号	1	李某	1966-08-28	完全刑事责任能力	1	51			汉族						本溪市		本溪市	中国				取保候审	其他存在明确被害人的纠纷												0	0	0		1	0	1	1
01345_（2017）京0105刑初992号 核对					0	（2017）京0105刑初992号	4	时爱华	1977-03-25	完全刑事责任能力	0	40						其他		有限公司总经理	山东省菏泽市单县	山东省单县		中国	高等专科学校	2016-06-14	2017-05-11	拘留 逮捕	不存在明确被害人的纠纷						王福银				北京灿鸿律师事务所		0	0	0
01346_（2019）辽1421刑初36号 核对			1		0	（2019）辽1421刑初36号	1	陈某										其他		工作人员						2018-07-11		拘留 逮捕	其他存在明确被害人的纠纷												0	0	1	1			1
01347_（2018）内0121刑初44号 核对		简易			0	（2018）内0121刑初44号	1	张某某										务农		务农	内蒙古自治区	内蒙古自治区	内蒙古自治区呼和浩特市	中国			2018-04-02	取保候审	其他存在明确被害人的纠纷												0	0	0				1
01348_（2018）川0521刑初24号 核对					0	（2018）川0521刑初24号	1	李孝永	1970-11-02	完全刑事责任能力	1	47			汉族			务农		务农	泸县	四川省泸县	泸县	中国	小学	2017-09-30	2018-01-15	拘留 逮捕	其他存在明确被害人的纠纷												0	0	0				1
01349_（2019）桂0422刑初421号 核对		简易			0	（2019）桂0422刑初421号	1	梁柱义	1968-08-28	完全刑事责任能力	1	51			汉族			务农		务农	广西壮族自治区藤县		藤县	中国	小学	2019-09-30	2019-12-05	拘留 逮捕	不存在明确被害人的纠纷												0	0	0				1
01350_（2017）云2502刑初22号 核对					0	（2017）云2502刑初22号	1	张文智	1987-10-07	完全刑事责任能力	1	29			汉族			务农		务农	云南省个旧市		云南省个旧市	中国	初中		2017-03-03	取保候审	其他存在明确被害人的纠纷												0	0	1				1	1
01351_（2015）唐刑初字第284号 核对		简易			0	（2015）唐刑初字第284号	1	赵某甲	1982-09-10	完全刑事责任能力	1	26			汉族			务农		务农	河南省唐河县		唐河县	中国	初中		2015-07-07	取保候审	其他存在明确被害人的纠纷												0	0	0
01352_（2013）一中刑初字第3195号 核对					0	（2013）一中刑初字第3195号	1	张文明	1953-08-28	完全刑事责任能力	1	60														2012-12-07	2013-07-16	逮捕	其他存在明确被害人的纠纷						王志强				北京市铭滔律师事务所		0	0	0
01353_（2019）浙0521刑初223号 核对		普通			0	（2019）浙0521刑初223号	4	马公明	1966-08-20	完全刑事责任能力	1	53			汉族						浙江省德清县		浙江省德清县	中国	初中	2019-01-11	2019-05-14	拘留 逮捕	其他存在明确被害人的纠纷						叶旭弘				浙江清溪律师事务所		0	0	0
01354_（2017）黔0330刑初309号 核对		普通			0	（2017）黔0330刑初309号	1	文远明	1976-11-15	完全刑事责任能力	1	41			汉族			无业		无业	贵州省仁怀市		贵州省仁怀市	中国	初中	2017-12-08	2017-11-20	拘留 逮捕 取保候审	不存在明确被害人的纠纷												0	0	0
01355_（2018）晋0109刑初674号核对					0	（2018）晋0109刑初674号	1	武栓生	1962-11-06	完全刑事责任能力	1	56			汉族			其他		法定代表人		山西省孝义市	山西省孝义市		初中	2018-02-06	2018-09-26	拘留 逮捕	其他存在明确被害人的纠纷						裴青青				山西树德律师事务所		0	0	0
01356_（2019）京0115刑初198号 核对		速裁			0	（2019）京0115刑初198号	1	姚沁	1997-11-04	完全刑事责任能力	0	21			汉族			无业		无业	山西省阳泉市矿区	河南省义马市		中国	中专（包括职业高中，中等专业学校，技工学校）	2019-01-07		逮捕 取保候审	其他存在明确被害人的纠纷						高会芬		1		北京市京兴律师事务所		0	0	0				1
01357_（2014）穗中法刑二初字第56号 核对					0	（2014）穗中法刑二初字第56号	5	彭某某	1971-09-24	完全刑事责任能力	1	42	1	1	汉族						广东省汕尾市城区	广东省汕尾市		中国		2013-12-26	2014-03-28	拘留 逮捕	不存在明确被害人的纠纷						陈始土				广东凯成律师事务所		0	0	0
01359_（2015）秦刑终字第80号 核对				1	0	（2015）秦刑终字第80号	5	梁文书										其他		其他						2014-01-02		拘留 逮捕	其他存在明确被害人的纠纷						翟秋松				河北隆正律师事务所		0	0	0		1	0
01360_（2015）朝刑初字第3090号 核对		简易			0	（2015）朝刑初字第3090号	1	史庆来	1982-09-24	完全刑事责任能力	1	33		0												2015-10-23	2015-12-02	拘留 逮捕	不存在明确被害人的纠纷						冯杰				北京市凯泰律师事务所		0	0	0				1
01361_（2018）粤0982刑初96号 核对					0	（2018）粤0982刑初96号	1	李某	1997-09-16	完全刑事责任能力	1	20		0	汉族			其他		个体户	广东省化州市			中国	小学	2017-12-21	2017-03-01	拘留 逮捕	其他存在明确被害人的纠纷												0	0	0
01362_（2018）鄂0607刑初157号 核对	1				0	（2018）鄂0607刑初157号	2	刘军	1989-09-19	完全刑事责任能力	1	28			汉族			务工		务工		河南省南阳市	河南省南阳市淅川县		小学	2017-12-15	2018-04-28	拘留 逮捕	其他存在明确被害人的纠纷						汪小波				湖北隆中律师事务所		0	0	0
01363_（2017）浙01刑初56号 核对					0	（2017）浙01刑初56号	12	宋泽	1977-02-12	完全刑事责任能力	1	47			汉族			无业		无业	罗山县			中国	普通高级中学	2016-07-01	2017-04-01	拘留 逮捕	其他存在明确被害人的纠纷						李中钧				浙江杭联律师事务所律师		0	0	0
01364_（2014）粤高法刑四终字第173号 核对			1		0	（2014）粤高法刑四终字第173号	1	陈德升	1983-08-17	完全刑事责任能力	1	31	1	1	汉族						汕头市澄海区	广东省汕头市		中国	初中	2013-03-15		拘留 逮捕	其他存在明确被害人的纠纷												0	0	0			0	1	1
01365_（2018）陕07刑终91号 核对			1		0	（2018）陕07刑终91号	3	张洪兵	1976-10-19	完全刑事责任能力	1	41	1	1	汉族			无业		无业		四川省都江堰市	四川省都江堰市			2017-12-01		拘留 逮捕 监视居住	其他存在明确被害人的纠纷												0	0	0			1
01366_（2014）仙刑初字第733号 核对		简易			0	（2014）仙刑初字第733号	1	黄开宗	1958-12-18	完全刑事责任能力	1	55	1	1	汉族			务农		务农		福建省仙游县	福建省仙游县		初中	2014-08-04	2014-11-07	拘留 逮捕 取保候审	其他存在明确被害人的纠纷												0	0	0				1	1
01368_（2017）闽0583刑初429号 核对		普通			0	（2017）闽0583刑初429号	1	蔡连环	1968-05-27	完全刑事责任能力	1	49		1	汉族			无业		无业		福建省南安市	南安市		初中	2016-12-29	2017-03-16	拘留 逮捕	不存在明确被害人的纠纷												0	0	0
01369_（2014）新刑初字第107号 核对					0	（2014）新刑初字第107号	1	毛某某											0								2014-08-25		其他存在明确被害人的纠纷						王剑锋				河南顺飞律师事务所		0	0	0
01370_（2015）沈河刑初字第00828号 核对					0	（2015）沈河刑初字第00828号	1	董世勋										无业		无业						2015-06-02	2015-10-20	拘留 逮捕	其他存在明确被害人的纠纷						王闯				辽宁咸达律师事务所		0	0	0				1
01371_（2017）鄂0602刑初74号 核对					0	（2017）鄂0602刑初74号	1	张某										其他		法定代表人/执行董事						2016-05-26	2017-03-07	拘留 逮捕	其他存在明确被害人的纠纷						李俊明	刘凯			湖北真武律师事务所	湖北真武律师事务所	0	0	0				1
01372_（2015）鄂东西湖刑初字第00211号		普通			0	（2015）鄂东西湖刑初字第00211号	2	袁某甲																		2014-12-12	2015-05-21	拘留 逮捕	其他存在明确被害人的纠纷						王越兵	杨亚			湖北得伟君尚律师事务所	湖北得伟君尚律师事务所	0	0	0				1
01373_（2016）湘0105刑初563号		简易			0	（2016）湘0105刑初563号	1	刘某某	1960-12-13	完全刑事责任能力	1	55			汉族			无业		无业	湖南省长沙市开福区	湖南省长沙市	湖南省长沙市开福区	中国	小学	2016-04-28	2016-11-18	拘留 逮捕	其他存在明确被害人的纠纷												0	0	0
01374_（2014）管刑初字第145号		普通			0	（2014）管刑初字第145号	1	鹿力钟	1988-11-10	完全刑事责任能力	1	25		1												2013-11-12	2014-01-23	拘留 逮捕	其他存在明确被害人的纠纷												0	0	0				1
01375_（2018）沪0106刑初1431号		简易			0	（2018）沪0106刑初1431号	1	祁某	1974-08-24	完全刑事责任能力	1	44			汉族						徐汇区			中国			2018-11-19		其他存在明确被害人的纠纷						傅其昌		1		北京盈科（上海）律师事务所律师		0	0	0
01376_（2017）苏0611刑初281号		简易转普通			0	（2017）苏0611刑初281号	1	葛丁姜	1989-12-01	完全刑事责任能力	1	28			汉族			无业		无业	江苏省南通市崇川区	江苏省南通市		中国	高等专科学校	2017-08-17	2017-10-19	拘留 逮捕	其他存在明确被害人的纠纷						戴俊				江苏凡海律师事务所		0	0	0
01377_（2016）苏0104刑初959号		简易			0	（2016）苏0104刑初959号	1	孙桂荣	1963-12-15	完全刑事责任能力	1	59		1	汉族			无业		无业		江苏省南京市	江苏省南京市鼓楼区		初中	2015-08-24	2016-11-16	拘留 逮捕 取保候审	不存在明确被害人的纠纷												0	0	0
01378_（2017）鲁0181刑初322号					0	（2017）鲁0181刑初322号	1	黄某某	1990-06-05	完全刑事责任能力	1	27	0	0	汉族			其他		宜和食品有限公司职工	山东省济南市	山东省济南市	山东省济南市章丘区	中国	大学本科	2017-06-16	2017-09-08	拘留 逮捕	其他存在明确被害人的纠纷						宁凡才				山东百脉律师事务所		0	0	0				1	1
01379_（2015）响刑初字第00091号		普通			0	（2015）响刑初字第00091号	1	徐某甲										无业		无业							2015-04-20	拘留	其他存在明确被害人的纠纷						尚颖成				江苏海悦律师事务所		0	0	0
01380_（2018）辽7102刑初22号		简易			0	（2018）辽7102刑初22号	1	王哲龙	1981-09-28	完全刑事责任能力	1	36	1	1												2018-06-04	2018-08-09	拘留 逮捕	其他存在明确被害人的纠纷												0	0	0
01381_（2016）苏0282刑初476号		简易			0	（2016）苏0282刑初476号	1	张某乙										其他		华达石化助剂厂门卫						2016-04-19	2016-05-19	拘留 逮捕	其他存在明确被害人的纠纷						何暖	孙雨茜			江苏国山律师事务所	江苏国山律师事务所	0	0	0
01382_（2017）冀0727刑初53号					0	（2017）冀0727刑初53号	2	蔡某某	1988-05-08	完全刑事责任能力	1	29			汉族						河北省蔚县		蔚县	中国	小学	2016-12-09	2017-07-06	拘留 逮捕	其他存在明确被害人的纠纷												0	0	0
01383_（2016）浙0683刑初779号		简易			0	（2016）浙0683刑初779号	1	万某某	1982-09-11	完全刑事责任能力	1	34			苗族			务农		务农			贵州省三穗县		小学	2016-07-30	2016-09-27	拘留 逮捕	其他存在明确被害人的纠纷												0	0	0				1
01384_（2015）上刑初字第53号		简易			0	（2015）上刑初字第53号	2	杨永超	1974-04-20	完全刑事责任能力	1	41		1	汉族											2015-06-19	2015-10-15	拘留 逮捕	其他存在明确被害人的纠纷												0	0	0
01385_（2017）冀0982刑初2号			1		0	（2017）冀0982刑初2号	1	张某	1971-01-26	完全刑事责任能力	1	46			汉族			无业		无业		河北省南皮县	河北省沧州市		大学本科		2016-04-18	取保候审	其他存在明确被害人的纠纷						孙书行				河北衡泰律师事务所		0	0	0	1			1	1
01386_（2018）闽0121刑初365号					0	（2018）闽0121刑初365号	3	马永昌	1988-11-18	完全刑事责任能力	1	29			汉族			务农		务农	广西壮族自治区桂林市荔浦县		福建省罗源县	中国	初中	2018-05-14	2018-06-27	拘留 逮捕	不存在明确被害人的纠纷						谢兴志				福建群韬律师事务所		0	0	0				1		1
01387_（2015）甬慈刑初字第285号		简易			0	（2015）甬慈刑初字第285号	1	曹某甲										务农		务农			慈溪市			2015-03-04	2015-01-28	取保候审 逮捕	其他存在明确被害人的纠纷												0	0	0					1
01388_（2016）粤1391刑初276号	1		1		0	（2016）粤1391刑初276号	1	杨立亚			1		0	1	汉族						河南省商丘市		惠州市	中国	初中	2016/7/29#2017/9/8		拘留 逮捕 取保候审	其他存在明确被害人的纠纷												0	0	0	1			1
01389_（2018）渝0242刑初185号		普通			0	（2018）渝0242刑初185号	6	冉艾青	1986-09-11	完全刑事责任能力	1	32											重庆市酉阳土家族苗族自治县			2018-02-13		拘留 逮捕	其他存在明确被害人的纠纷						冉景涛				重庆汇润律师事务所		0	0	0				1		1
01390_（2017）粤53刑终135号			1		0	（2017）粤53刑终135号	1	黎林新	1984-11-07	完全刑事责任能力	1	33			汉族						郁南县	广东省郁南县	云浮市云城区	中国	初中			取保候审	其他存在明确被害人的纠纷						黄伟雄				广东刚毅律师事务所		0	0	0		1	0		1
01391_（2015）台黄刑初字第740号		简易			0	（2015）台黄刑初字第740号	1	陈某										其他		个体工商户							2015-10-12	取保候审	其他存在明确被害人的纠纷												0	0	0				1	1
01392_（2015）谯刑初字第00225号					0	（2015）谯刑初字第00225号	1	张某甲								0			1								2015-04-01	取保候审	其他存在明确被害人的纠纷						刘爱玲	周涛	1	1	亳州市法律援助中心	亳州市法律援助中心	0	0	0
01393_（2013）夏少刑初字第138号		简易			0	（2013）夏少刑初字第138号	3	岳某甲																		2013-07-11	2013-09-22	拘留 逮捕	其他存在明确被害人的纠纷												0	0	0				1
01395_（2015）新刑初字第105号		简易			0	（2015）新刑初字第105号	1	李某甲	1971-03-10	完全刑事责任能力	1	44			汉族			无业		无业					初中		2015-06-19	监视居住	其他存在明确被害人的纠纷												0	0	0				1
01396_（2019）皖0304刑初60号		简易			0	（2019）皖0304刑初60号	1	胡某某	1991-06-19	完全刑事责任能力	1	27	1	1	汉族			务工		务工		安徽省蚌埠市	蚌埠市禹会区			2018-12-29	2019-02-22	拘留 逮捕	其他存在明确被害人的纠纷												0	0	0				1
01397_（2014）梅兴法刑初字第169号		简易			0	（2014）梅兴法刑初字第169号	1	高幼灵	1962-12-09	完全刑事责任能力	1	51			汉族			无业		无业		广东省兴宁市	兴宁市		初中	2014-04-22	2014-07-10	拘留 逮捕	其他存在明确被害人的纠纷						陈林东						0	0	0				1
01398_（2014）浙温刑初字第55号					0	（2014）浙温刑初字第55号	1	被告人张敏武																		2012-02-10	2014-03-07	拘留 逮捕 取保候审	其他存在明确被害人的纠纷						薄士坤						0	0	0
01399_（2017）川刑再6号	1		1		0	（2017）川刑再6号	1	李钢	1958-09-27	完全刑事责任能力	1	60			汉族			原四川天责律师事务所主任#雅安市第一届政协委员		原四川天责律师事务所主任#雅安市第一届政协委员			四川省雅安市雨城区		硕士研究生	2006-10-24		拘留 逮捕	其他存在明确被害人的纠纷						熊建新				四川公生明律师事务所		0	0	0		1
01400_（2018）黔03刑初137号					0	（2018）黔03刑初137号	2	陈建喜	1976-09-10	完全刑事责任能力	1	43			汉族						福建省莆田市荔城区		莆田市荔城区	中国	高等专科学校	2017/12/15#2018/12/21	2018-11-15	拘留 逮捕 取保候审 逮捕	其他存在明确被害人的纠纷						丁铁	付春燕			贵州他山律师事务所	贵州他山律师事务所	0	0	0				1
01401_许俊走私、贩卖、运输、制造毒品罪一审刑事判决书-核对		简易			0	（2019）川0112刑初213号	1	许俊	1989-03-26	完全刑事责任能力	1	30	0		汉族						成都市龙泉驿区			中国	初中	2019-01-30	2019-04-24	逮捕 拘留							张雨菁		0		四川川商律师事务所		0	0	0
01402_陈红走私、贩卖、运输、制造毒品一审刑事判决书-核对		简易			0	（2018）沪0106刑初1011号	1	陈红	1963-03-23	完全刑事责任能力	1	55	1	1	汉族		0				上海市静安区			中国			2018-09-03								欧香英		1		上海慧谷律师事务所		0	0	0
01403_张萌、中国人民财产保险股份有限公司青岛市车险业务第二支公司交通肇事一审刑事判决书-核对					0	（2019）鲁1311刑初108号	1	张萌	1987-06-26	完全刑事责任能力	1	32	0		汉族			务工		务工		山东省临沭县	山东省临沭县		大学本科	2019-01-02	2019-02-28	逮捕 拘留							陈延超	汤月玲	0	0	山东铭星律师事务所	山东铭星律师事务所	0	0	1
01404_刘祖平走私、贩卖、运输、制造毒品一审刑事判决书-核对		简易			0	（2017）鄂0192刑初262号	1	刘祖平	1984-09-01	完全刑事责任能力	1	33	1	1	汉族		0	无业		无业	湖北省当阳市	湖北省当阳市	湖北省武汉市东湖新技术开发区	中国	初中	2017-04-13	2017-06-05	逮捕 拘留													0	0	0				1
01405_周菲菲合同诈骗一审刑事判决书-核对					0	（2017）粤01刑初472号	1	周菲菲	1980-09-08	完全刑事责任能力	0	38			汉族						广东省广州市白云区		广东省湛江市	中国	初中	2017-04-14	2017-11-01	逮捕 拘留							陈杰华	戚佩斯	0	0	广东承诺律师事务所	广东承诺律师事务所	0	0	0				0	0
01406_李文科非法行医一审刑事判决书-核对					0	（2018）豫0928刑初579号	1	李文科	1969-03-20	完全刑事责任能力	1	49	0		汉族			务农		务农			河南省濮阳县		小学	2018-01-23	2018-09-21	逮捕 监视居住 拘留							刘先先		0		河南省董彦军律师事务所		0	0	1
01407_姚光进走私、贩卖、运输、制造毒品、容留他人吸毒一审刑事判决书-核对		简易			0	（2017）鄂0114刑初400号	1	姚光进	1971-08-11	完全刑事责任能力	1	46			汉族			无业		无业	湖北省武汉市蔡甸区	湖北省武汉市	湖北省武汉市蔡甸区	中国	初中	2017-11-28	2017-11-23	逮捕 取保候审 拘留													0	0	0
01408_文来、文孝、文奎犯盗窃罪一审刑事判决书-核对					0	（2014）佛明法刑初字第41号	3	文某一	1982-08-01	完全刑事责任能力	1	32	1	1	土家族		0	无业		无业					小学	2013-10-18	2013-12-26	逮捕 拘留							程明铸	陆仲飞	0	0	广东华法（高明）律师事务所	广东华法（高明）律师事务所	0	0	0
01409_王柏根赌博一审刑事判决书-核对		简易			0	（2017）浙0602刑初590号	1	王柏根	1968-01-19	完全刑事责任能力	1	49			汉族			无业		无业	浙江省绍兴市越城区	浙江省绍兴市	浙江省绍兴市越城区	中国	初中	2017-01-26	2017-07-11	逮捕 拘留 取保候审							杨欣超	蒋淑娜	0	0	浙江大容律师事务所	浙江大容律师事务所	0	0	0				1
01410_常某某拒不支付劳动报酬一审刑事判决书-核对					0	（2015）外刑初字第454号	1	常某某	1957-08-08	完全刑事责任能力	1	59			回族			无业		无业	黑龙江省哈尔滨市道里区		黑龙江省哈尔滨市道里区	中国	初中	2015-03-05	2015-08-21	逮捕 拘留							郭学伟		0		黑龙江金圣崴律师事务所		0	0	0
01411_陈友胜、陈某乙走私、贩卖、运输、制造毒品罪，陈某甲窝藏、转移、隐瞒毒品、毒赃罪等一审刑事判决书-核对					0	（2013）浙绍刑初字第85号	3	陈友胜																		2013-04-03	2013-10-21	拘留 逮捕	不存在明确被害人的纠纷						卢兵		1				0	0	0
01412_宋××、袁××等犯聚众斗殴罪一审刑事判决书-核对		简易			0	（2016）津0116刑初80038号	3	宋××																		2015-08-06	2016-03-18	拘留 逮捕	其他存在明确被害人的纠纷						张静怡				北京盈科（天津）律师事务所		0	0	0				1	1
01413_闫星、雷庆友合同诈骗罪一审刑事判决书					0	（2014）平刑初字第338号	2	雷庆友	1979-07-14	完全刑事责任能力	1	35														2014-03-25	2014-09-26	拘留 逮捕	其他存在明确被害人的纠纷						周宝胜				北京市时雨律师事务所		0	0	0
01414_何登举犯强奸罪一审刑事判决书-核对		普通			0	（2015）绍诸刑初字第1175号	1	何登举										务农		务农						2015-06-24	2015-09-18	拘留 逮捕	其他存在明确被害人的纠纷												0	0	0
01415_王家亮故意杀人一审刑事判决书-核对					0	（2014）宿中刑初字第0009号	1	王家亮	1957-07-02	完全刑事责任能力	1	57			汉族			务农		务农		江苏省泗洪县			小学	2013-07-11	2014-04-28	拘留 逮捕	家庭纠纷						王扬冰	倪晗			江苏苏扬律师事务所	江苏苏扬律师事务所	0	0	0
01416_王乃芳贪污、挪用公款二审刑事判决书-核对			1		0	（2017）鲁09刑终11号	1	王乃芳																					不存在明确被害人的纠纷						陈善伟				山东兴峰律师事务所		0	0	0		1	0
01417_潘某某容留他人吸毒罪一审刑事判决书-核对					0	（2016）粤0306刑初6155号	1	潘某某	1969-10-01	完全刑事责任能力	1	47	0		汉族						广东省深圳市		广东省深圳市宝安区	中国	初中	2016/7/8#2016/12/14		拘留 逮捕 取保候审 逮捕	不存在明确被害人的纠纷						杜舒寒	王双飞			广东中熙律师事务所	广东中熙律师事务所	0	0	0
01418_刘杰职务侵占罪、非国家工作人员受贿罪一审刑事判决书-核对					0	（2014）敦刑初字第187号	1	刘某					0	0												2013/11/21#2014/5/29	2014-05-29	拘留 逮捕 取保候审 逮捕	不存在明确被害人的纠纷 其他存在明确被害人的纠纷						魏志友				吉林冠宁律师事务所		0	0	0
01419_吴旺水生产、销售伪劣产品一审刑事判决书		简易			0	（2019）粤0507刑初378号	1	吴旺水	1971-01-20	完全刑事责任能力	1	48			汉族			无业		无业	福建省云霄县	福建省云霄县		中国	初中	2019-01-22	2019-05-05	拘留 逮捕	不存在明确被害人的纠纷												0	0	0				1
01420_邹某挪用资金罪一审刑事判决书-核对		简易			0	（2016）闽0602刑初588号	1	邹某	1976-12-12	完全刑事责任能力	0	40			汉族			务工		有限公司职工					高等专科学校		2016-07-28	拘留 取保候审	其他存在明确被害人的纠纷												0	0	0
01421_被告人吴晴华贩卖毒品罪一审刑事判决书-核对		简易			0	（2019）湘0105刑初273号	1	吴晴华	1988-10-22	完全刑事责任能力	1	31	1	1	汉族		0	无业		无业	湖北省荆门市钟祥市	湖北省荆门市	长沙市雨花区	中国	普通高级中学	2018-12-21	2019-05-27	拘留 逮捕	不存在明确被害人的纠纷												0	0	0
01422_冯正兵行贿一审刑事判决书-核对					0	（2016）皖1124刑初165号	1	冯正兵	1973-05-05	完全刑事责任能力	1	44	0		汉族			其他		其他	江苏省南京市浦口区		安徽省全椒县	中国	高等专科学校	2016-05-18	2016-10-11	逮捕 拘留							王树人	马金扶	0	0	北京君致律师事务所	北京晟兴律师事务所	0	0	0
01423_自诉人暨附带民事诉讼原告人吕宁坚与被告人许彰祥犯故意伤害纠纷一审刑事判决书-核对					1	（2001）安刑初字第68号	1	许彰祥			1																2001-09-10								谭水玲	戴晓春					0	0	1
01424_闵某某故意伤害一审刑事判决书-核对					0	（2014）红刑初字第584号	1	闵某某	1967-05-24	完全刑事责任能力	1	47			汉族			务农		务农					小学	2014-07-01	2014-09-12	逮捕 拘留							徐贤芳		0		贵州大智律师事务所		0	0	0
01425_谭志伟非法持有毒品罪一审刑事判决书-核对		简易			0	（2018）鄂0191刑初139号	1	谭志伟										无业		无业						2018-02-01	2018-07-24	逮捕 拘留							陈国基		0		湖北佳元律师事务所		0	0	0
01426_宁某某、袁某走私、贩卖、运输、制造毒品、容留他人吸毒一审刑事判决书-核对		简易			0	（2019）鄂0114刑初194号	2	宁某某	1976-01-24	完全刑事责任能力		43	1	1	汉族		0	无业		无业	湖北省武汉市蔡甸区		湖北省武汉市蔡甸区	中国	初中	2018-09-30	2019-05-27	逮捕 拘留							周成		0		湖北人言律师事务所		0	0	0
01427_肖鹏、刘某走私、贩卖、运输、制造毒品一审刑事判决书-核对		简易			0	（2018）鄂0114刑初511号	3	肖鹏										无业		无业						2018-09-29	2018-12-11	逮捕 拘留													0	0	0				1
01428_许永强逃税、国有公司、企业、事业单位人员滥用职权、滥用职权一审刑事判决书-核对					0	（2018）冀0524刑初16号	1	许永强	1967-05-11	完全刑事责任能力	1	51			汉族			其他		其他	河北省保定市莲池区	河北省廊坊市霸州市	河北省保定市莲池区	中国	大学本科	2017-05-19	2018-01-24	逮捕 监视居住 拘留							韩景辉	李建辉	0	0	河北天禹律师事务所	河北同欣律师事务所	0	0	0
01429_郭冰煌走私、贩卖、运输、制造毒品一审刑事判决书-核对		简易			0	（2016）云7101刑初16号	1	郭冰煌	1991-11-17	完全刑事责任能力	1	25			汉族			务农		务农			福建省厦门市同安区			2016-02-04	2016-03-23	逮捕 拘留							吴振刚		0		云南典传律师事务所		0	0	0
01430_毛红平容留他人吸毒一审刑事判决书-核对		简易			0	（2018）浙0104刑初864号	1	毛红平	1974-12-28	完全刑事责任能力	1	44			汉族						江西省南昌市安义县			中国	初中	2018-04-20	2018-09-28	逮捕 拘留							吴剑敏		0		浙江沁地律师事务所		0	0	0				1
01431_母新平、母连喜贪污、滥用职权、受贿二审刑事判决书-核对			1		0	（2017）豫刑终19号	2	母新平	1962-11-26		1	55			汉族			其他		其他			河南省郑州市惠济区		初中	2015-02-16		逮捕 拘留							林东	李爱兵	0	0	河南国基律师事务所	河南国基律师事务所	0	0	0		1
01432_周昌文犯贪污罪、挪用公款罪一审刑事判决书-核对		简易			0	（2016）黔0222刑初433号	1	周昌文	1963-11-17	完全刑事责任能力	1	53			汉族								贵州省盘县		中专（包括职业高中，中等专业学校，技工学校）	2016-04-13	2016-08-18	逮捕 拘留													0	0	0
01433_王某走私、贩卖、运输、制造毒品再审刑事判决书-核对	1				0	（2016）鄂0114刑再1号	1	王某			1															2016-03-10		逮捕 拘留													0	0	0		1
01434_刘强强迫卖淫罪，刘强强奸罪一审刑事判决书-核对					0	（2015）金义刑初字第349号	1	刘强																		2014-11-27	2015-01-26	逮捕 拘留							钟兰友	吴天春	0	0	浙江奇合正律师事务所	浙江奇合正律师事务所	0	0	0
01436_毛雪走私、贩卖、运输、制造毒品罪一审刑事判决书-核对		简易			0	（2017）鄂0191刑初191号	1	毛雪	1989-08-20	完全刑事责任能力	1	28			汉族			无业		无业	湖北省武汉市汉阳区			中国	中专（包括职业高中，中等专业学校，技工学校）	2017-03-30	2017-08-17	逮捕 拘留													0	0	0
01437_丁友全贪污一审刑事判决书-核对					0	（2019）京02刑初46号	1	丁友全	1963-06-05	完全刑事责任能力	1	56			汉族			其他		其他			北京市房山区		高等专科学校	2018-11-30	2019-02-12	逮捕							李艳	张旭	0	0	北京市博维律师事务所	北京市博维律师事务所	1	0	0				1	1
01438_蔡万金走私、贩卖、运输、制造毒品罪一审刑事判决书-核对		简易			0	（2018）鄂0191刑初20号	1	蔡万金	1965-09-15	完全刑事责任能力	1	53			汉族			无业		无业	湖北省武汉市经济开发区			中国	小学	2017-11-07	2018-01-29	逮捕 拘留							卢家勤		0		湖北云开正泰律师事务所		0	0	0
01439_桂某、李某盗窃罪一审刑事判决书-核对		简易			0	（2015）浦刑初字第00067号	2	桂某																			2015-03-02	拘留 取保候审													0	0	0				1	1
01440_李某甲、文某非法采矿二审刑事判决书-核对			1		0	（2016）赣03刑终73号	7	李某甲	1965-07-03	完全刑事责任能力	1	52			汉族			其他		其他	江西省萍乡市	江西省萍乡市		中国	初中	2014-10-09		取保候审 逮捕 取保候审 拘留							陈文解		0		江西宏正律师事务所		0	0	0	1	1	0
01441_徐元霞、张震走私、贩卖、运输、制造毒品罪一审刑事判决书-核对		简易			0	（2017）鄂0191刑初28号	2	徐元霞	1976-03-21	完全刑事责任能力	0	44	1	1	汉族			无业		无业	湖北省武汉市汉阳区	湖北省武汉市		中国	初中	2016-10-18	2017-01-18	逮捕 拘留													0	0	0
01442_马某1滥用职权罪一审刑事判决书-核对					0	（2015）会刑初字第48号	1	马某1													甘肃省兰州市	甘肃省庆阳市	甘肃省兰州市	中国			2015-03-11								张某1	陈某1	0	0	甘肃正天合律师事务所	甘肃正天合律师事务所	0	0	0
01443_向英俊强奸一审刑事判决书-核对					0	（2018）湘1224刑初145号	1	向英俊	1990-04-04	完全刑事责任能力	1	28			土家族			其他		其他	湖南省溆浦县		湖南省溆浦县	中国	普通高级中学	2017-11-22	2018-04-25	逮捕 拘留							付美月		0		湖南民海律师事务所		0	0	0
01444_彭忠走私、贩卖、运输、制造毒品一审刑事判决书-核对		简易			0	（2018）鄂0116刑初383号	1	彭忠	1969-11-05	完全刑事责任能力	1	49			汉族			无业		无业			湖北省武汉市黄陂区		小学	2018-03-20	2018-06-12	逮捕 拘留													0	0	0				1
01445_被告人张某某犯滥用职权罪、受贿罪一案刑事判决书-核对		普通			0	（2016）辽0122刑初263号	1	张某某	1966-04-06		0				汉族								辽宁省沈阳市辽中区		高等专科学校	2016-10-27	2016-07-28	逮捕 取保候审							张立刚		0		辽宁百联律师事务所		0	0	0
01446_火皮机伍犯盗窃罪一审刑事判决书-核对					0	（2016）浙0203刑初438号	2	火皮机伍															四川省昭觉县			2016-05-11	2016-10-08	逮捕 拘留							刘庆		1		浙江正甬律师事务所		0	0	0
01447_被告人李飞贩卖毒品罪一审刑事判决书-核对		简易			0	（2016）鄂0114刑初96号	1	李飞	2016-04-01	完全刑事责任能力			1	1												2016-02-05		拘留 逮捕	不存在明确被害人的纠纷						朱志勇	李婷			湖北平渊律师事务所	湖北平渊律师事务所	0	0	0
01448_王富兵犯诈骗罪一案一审刑事判决书-核对					0	（2011）卫刑初字第155号	1	王富兵	1969-04-24	完全刑事责任能力	1	42															2011-06-09		其他存在明确被害人的纠纷						缪璐明				河南恒辉律师事务所		0	0	0
01449_余某某走私、贩卖、运输、制造毒品一审刑事判决书-核对		简易			0	（2017）鄂0114刑初25号	1	余某某	1969-10-18	完全刑事责任能力	1	48			汉族			无业		无业		湖北省武汉市	湖北省武汉市蔡甸区		小学	2016-11-23	2017-01-11	拘留 逮捕	不存在明确被害人的纠纷												0	0	0
01451_高某、闫某、刘某、任某、白某寻衅滋事罪一审刑事判决书-核对					0	（2017）晋1125刑初120号	5	高某			1				汉族							山西省柳林县				2016-08-12	2017-01-22	拘留 逮捕 取保候审	其他存在明确被害人的纠纷						胡建平				山西建志律师事务所		0	0	0				1	1
01452_李某某侵犯著作权罪一审刑事判决书-核对					0	（2015）章刑初字第440号	1	李某某	1973-05-27	完全刑事责任能力	1	42			汉族			其他		其他		山东省章丘市	山东省章丘市		初中		2015-10-16	拘留 取保候审	不存在明确被害人的纠纷						李宏				山东鲁明律师事务所		0	0	0				1	1
01453_杨力、张充能、郝亮敲诈勒索、寻衅滋事、非法经营、诈骗、容留他人吸毒一审刑事判决书-核对					0	（2018）晋0502刑初483号	3	杨力	1986-12-02	完全刑事责任能力	1	32	1	1	汉族			无业		无业	山西省太原市		山西省晋城市	中国	大学本科	2018-07-28	2018-11-01	拘留 逮捕	其他存在明确被害人的纠纷												0	0	0				1
01454_王某开设赌场罪一审刑事判决书-核对		简易			0	（2013）甬余刑初字第1850号	1	王某																		2013-11-28	2013-12-12	拘留 取保候审 逮捕													0	0	0				1
01455_张雪琴,苏坤忠,苏海英走私、贩卖、运输、制造毒品罪一审刑事判决书-核对		简易			0	（2015）深福法刑初字第2062号	3	张某甲										无业		无业	广东省潮州市饶平县		广东省深圳市福田区	中国		2015-09-24	2015-12-16	拘留 逮捕	不存在明确被害人的纠纷						于奎				广东广和律师事务所		0	0	0				1
01456_袁文强走私、贩卖、运输、制造毒品一审刑事判决书-核对		简易			0	（2018）鄂0192刑初200号	1	袁文强	1992-08-19	完全刑事责任能力	1	26	1	1	汉族			无业		无业	湖北省武汉市	湖北省武汉市	湖北省武汉市青山区	中国	初中	2018-02-01	2018-04-12	拘留 逮捕													0	0	0				1
01457_莫尚德盗窃罪一审刑事判决书-核对					0	（2015）双流刑初字第145号	1	莫尚德	1993-04-26	完全刑事责任能力	1	22			汉族								四川省资阳市乐至县			2014-09-28	2014-12-29	拘留 逮捕	其他存在明确被害人的纠纷												0	0	0
01458_被告人潘建武、周德意、王家良、徐龙贩卖毒品、容留他人吸毒罪一审刑事判决书-核对		简易			0	（2019）湘0105刑初106号	4	潘建武	1996-06-29	完全刑事责任能力	1	23			汉族			无业		无业	湖南省宁乡市	湖南省宁乡市	湖南省宁乡市	中国		2018-10-26	2019-02-28	拘留 逮捕	不存在明确被害人的纠纷												0	0	0
01459_609张剑、张峰抢劫罪一审刑事判决书-核对		简易			0	（2018）苏1012刑初609号	2	张剑	1981-03-25	完全刑事责任能力	1	37			汉族			其他		其他		江苏省扬州市江都区	江苏省扬州市江都区		普通高级中学	2018-05-28	2018-08-08	拘留 逮捕	其他存在明确被害人的纠纷						钱平	张薇薇			江苏擎天柱律师事务所	江苏擎天柱律师事务所	0	0	0
01460_陈光肖、段小龙走私、贩卖、运输、制造毒品、容留他人吸毒一审刑事判决书-核对		简易			0	（2018）鄂0116刑初640号	2	陈光肖										无业		无业						2018-04-19	2018-09-10	拘留 逮捕	不存在明确被害人的纠纷												0	0	0				1
01461_吴光和强奸罪一审刑事判决书-核对					0	（2017）浙0182刑初273号	1	吴光和	1997-12-04	完全刑事责任能力	1	20			苗族			其他		其他	贵州省惠水县		浙江省建德市	中国	小学	2017-08-14	2017-09-21	拘留 逮捕							王明来				浙江贤哲律师事务所		0	0	0
01462_谢某某走私、贩卖、运输、制造毒品、容留他人吸毒一审刑事判决书-核对		普通			0	（2019）鄂0114刑初101号	1	谢某某	1977-05-07	完全刑事责任能力	1	42			汉族			无业		无业	湖北省武汉市蔡甸区	湖北省武汉市蔡甸区	湖北省武汉市蔡甸区	中国		2018-12-27	2019-03-11	拘留 逮捕													0	0	0
01463_丁琼祥、芦慧琴走私、贩卖、运输、制造毒品、容留他人吸毒一审刑事判决书-核对		普通			0	（2018）鄂0103刑初1252号	2	丁琼祥										无业		无业						2018-06-21	2018-10-17	拘留 逮捕							彭功平				湖北金雅律师事务所		0	0	0
01465_王磊信用卡诈骗罪一审刑事判决书-核对					0	（2014）海刑初字第2420号	1	王磊	1981-10-26	完全刑事责任能力	1	33														2014-08-06		逮捕							朱锡忠				北京法旺律师事务所		0	0	0				1
01466_杨永东合同诈骗一审刑事判决书-核对					0	（2015）成刑初字第00041号	1	杨永东	1967-07-17	完全刑事责任能力	1	50			汉族			其他		其他	四川省成都市武侯区			中国	普通高级中学	2014-06-20		拘留 逮捕							江发云				四川蜀都律师事务所		0	0	0
01467_秦德成故意伤害罪二审刑事判决书-核对			1		0	（2018）青刑终25号	1	秦德成	1988-04-11	完全刑事责任能力	1	30			土族			其他		其他		青海省共和县	青海省西宁市		高等专科学校	2017-09-28		拘留 逮捕	其他存在明确被害人的纠纷						毛远龙				青海普兴律师事务所		0	0	1		1	1	1	1
01468_高月芹走私、贩卖、运输、制造毒品罪一审刑事判决书-核对		简易			0	（2017）浙0102刑初441号	1	高月芹	1968-07-30	完全刑事责任能力	0	49			汉族			务农		务农	杭州市萧山区			中国	小学	2017-09-21	2017-10-25	拘留 逮捕	不存在明确被害人的纠纷						高翔		1		浙江乐道律师事务所		0	0	0				1
01469_99孙荷生污染环境罪一审刑事判决书-核对		普通			0	（2018）苏0508刑初99号	1	孙荷生	1971-10-26	完全刑事责任能力	1				汉族			其他		其他	苏州市相城区		太仓市	中国	小学	2017-05-05	2018-02-06	拘留 逮捕							蒋永明				江苏正文人律师事务所		0	0	0
01470_肖某某走私、贩卖、运输、制造毒品、容留他人吸毒一审刑事判决书-核对		简易			0	（2017）鄂0114刑初111号	1	肖某某	1982-08-02	完全刑事责任能力	1	35			汉族			无业		无业		湖北省武汉市	湖北省武汉市蔡甸区		初中	2017-01-26	2017-04-01	拘留 逮捕	不存在明确被害人的纠纷												0	0	0
01472_李水源、赵志达走私、贩卖、运输、制造毒品一审刑事判决书					0	（2017）粤12刑初7号	3	李水源	1972-03-01	完全刑事责任能力	1	45			汉族						广东省云浮市云安区		广东省肇庆市端州区	中国	初中	2016-04-28		拘留 逮捕	不存在明确被害人的纠纷						董卫华				广东执正律师事务所律师。		0	0	0
01473_张玉澍挪用公款一审刑事判决书					0	（2016）吉0105刑初235号	1	张玉澍	1969-05-27	完全刑事责任能力	0	47						务工		国有商业银行营业部现金管理中心自助设备加钞组主管兼加钞员			长春市南关区				2016-08-19	取保候审	其他存在明确被害人的纠纷												0	0	0
01477_孙伟合同诈骗一审刑事判决书					0	（2017）豫0184刑初900号	1	孙伟	1982-06-10	完全刑事责任能力	1	35	0	0	汉族		0	无业		无业		河南省长葛市	河南省长葛市		初中		2017-09-20	拘留 取保候审	其他存在明确被害人的纠纷												0	0	0				1	1
01480_黑万力故意伤害案一审刑事判决书					0	（2015）桐刑初字第00067号	1	黑万力	1968-11-16	完全刑事责任能力	1	47														2014-12-31	2015-04-02	拘留 逮捕	邻里矛盾						周天雷				河南兴淮律师事务所律师		0	0	0				1
01482_郑某侵犯著作权案一审刑事判决书		简易			0	（2013）杨刑（知）初字第120号	1	郑某																					不存在明确被害人的纠纷						胡立宪				上海凯曼律师事务所律师		0	0	0
01495_吴某盗窃一审刑事判决书-核对		简易			0	（2015）兴刑初字第247号	1	吴某										无业		无业						2015-02-17	2015-05-14	拘留 逮捕	其他存在明确被害人的纠纷												0	0	0				1
01496_吕家贤、徐宣寻衅滋事一审刑事判决书		简易			0	（2018）浙1082刑初514号	5	吕家贤	1991-03-07	完全刑事责任能力	1	27	1	1	汉族		0	务农		务农		云南省富源县	云南省富源县		小学	2018-04-03	2018-06-19	拘留 逮捕	其他存在明确被害人的纠纷												0	0	0
01500_张利萍走私、贩卖、运输、制造毒品罪一审刑事判决书		简易			0	（2017）鄂0191刑初318号	1	张利萍	1972-10-04	完全刑事责任能力	0	45			汉族			其他		计算机软件公司业务员	陕西省西安市莲湖区	陕西省西安市		中国	普通高级中学	2017-08-24	2017-11-27	拘留 逮捕	不存在明确被害人的纠纷						于小晓	范晨旭			湖北朋来律师事务所律师。	湖北朋来律师事务所律师。	0	0	0
01505_李某某贩卖毒品罪一案一审刑事判决书					0	（2015）都刑初字第31号	1	李某某			1				布依族			无业		无业					初中	2014-10-12	2014-12-24	拘留 逮捕	不存在明确被害人的纠纷						张仁义				贵州仁义律师事务所律师		0	0	0
01507_李涛犯受贿罪一案一审刑事判决书					0	（2011）桐刑初字第16号	1	李涛	1967-08-12	完全刑事责任能力	1	43						务工		高中总务处副主任							2010-11-19	取保候审	不存在明确被害人的纠纷						曹向东	周天雷			河南银基律师事务所律师	河南兴淮律师事务所律师。	0	0	0
01508_徐杰、唐林等走私、贩卖、运输、制造毒品罪一审刑事判决书					0	（2016）湘01刑初50号	14	徐杰	1983-11-12	完全刑事责任能力	1	34	1	1	汉族		0	无业		无业	湖南省邵阳县		广东省东莞市	中国	初中	2015-09-30	2016-04-18	逮捕	不存在明确被害人的纠纷						陈瑜	陈南泉			湖南轩辕律师事务所律师	湖南谐正律师事务所律师。	0	0	0				0	0
01511_王旭辉、刘显锋盗窃罪一审刑事判决书					0	（2017）内2201刑初103号	2	王旭辉	1977-11-13	完全刑事责任能力	1	40	1	1	汉族		0	无业		无业	黑龙江省齐齐哈尔市		黑龙江省齐齐哈尔市	中国	初中		2017-03-30		其他存在明确被害人的纠纷						赵玉鑫				内蒙古天厚律师事务所律师		0	0	0
01512_被告人尚某某犯故意伤害罪一审刑事判决书					0	（2017）辽0792刑初42号	1	尚某			1				汉族			无业		无业	辽宁省锦州市古塔区		辽宁省锦州市古塔区	中国	普通高级中学				其他存在明确被害人的纠纷						李彦青				辽宁名崛律师事务所律师		0	0	1
01513_寇小强抢劫罪一审刑事判决书		简易			0	（2018）浙0213刑初163号	1	寇小强	1992-05-26	完全刑事责任能力	1	26		1	汉族			务农		务农		四川省盐亭县	四川省盐亭县		初中	2018-01-04	2018-03-29	拘留 逮捕	其他存在明确被害人的纠纷						江民军		1		浙江求是行律师事务所律师		0	0	0
01514_沈某容留他人吸毒罪一审刑事判决书		简易			0	（2018）辽0114刑初597号	1	沈某	1982-10-06	完全刑事责任能力	1	36	1	1	汉族		0	无业		无业					初中	2018-06-04	2018-10-09	拘留 逮捕	不存在明确被害人的纠纷												0	0	0
01517_阮明民贩毒一案二审刑事判决书			1		0	（2016）辽刑终481号	2	阮明民	1982-05-17	完全刑事责任能力	1	35			回族							辽宁省清原满族自治县			初中	2013-12-04		拘留 逮捕	不存在明确被害人的纠纷						韩学玲				辽宁三君律师事务所律师		0	0	0		1	0
01519_甘金成强奸一审刑事判决书					0	（2018）川0180刑初10号	1	甘金成	1951-09-19	完全刑事责任能力	1	67			汉族			务农		务农		四川省简阳市	四川省简阳市		小学	2017-10-13	2018-01-04	拘留 逮捕	其他存在明确被害人的纠纷												0	0	0				1
01522_闫永明走私、贩卖、运输、制造毒品一审刑事判决书					0	（2014）德刑一初字第162号	1	闫永明	1968-05-13	完全刑事责任能力	1	46	1	1	汉族		0	务农		务农			保山市龙陵县		文盲	2013-09-17	2015-05-10	拘留 逮捕	不存在明确被害人的纠纷						尹家顺		1		德宏州新元法律服务所法律工作者		0	0	0
01523_王某某走私、贩卖、运输、制造毒品一审刑事判决书					0	（2017）沪0109刑初1031号	1	王某某	1981-01-17	完全刑事责任能力	1	36		1	汉族						上海市普陀区			中国			2017-11-03		不存在明确被害人的纠纷												0	0	0
01525_刘双桂、曹巍犯走私、贩卖、运输、制造毒品罪张某甲犯非法持有毒品罪一审刑事判决书					0	（2015）岳中刑一初字第38号	3	刘双桂	1965-09-25	完全刑事责任能力	0	50			汉族			无业		无业		湖南省常德市	常德市武陵区		初中	2015-04-09	2015-08-13	拘留 监视居住 拘留 逮捕	不存在明确被害人的纠纷						姜永慧				湖南湘杰律师事务所律师		0	0	0
01526_张某危险驾驶一审刑事判决书		简易			0	（2014）宝刑初字第652号	1	张某																			2014-04-04	取保候审	不存在明确被害人的纠纷												0	0	0
01527_赵亚普、王璞盗窃一审刑事判决书					0	（2018）豫0105刑初876号	6	赵亚普	1986-01-20	完全刑事责任能力	1	33			汉族			其他		个体经营者	郑州市中原区	河南省新野县	郑州市金水区	中国	大学本科	2016-10-28		拘留 逮捕	其他存在明确被害人的纠纷						范现彬	康顺杰			河南广奥律师事务所律师	河南松杉律师事务所律师	0	0	0
01528_谢某犯盗窃罪一审刑事判决书					0	（2014）太刑二初字第00322号	1	谢扬飞	1985-08-25	完全刑事责任能力	1	30		1									湖南省耒阳市			2014-07-04	2014-11-25	拘留 逮捕 取保候审	其他存在明确被害人的纠纷						慕东东				江苏孙剑良律师事务所律师		0	0	0
01538_李江平贩卖毒品案一审刑事判决书		普通			0	（2016）湘0103刑初658号	1	李江平	1977-09-26	完全刑事责任能力	1	40										江西省抚州市				2016-10-31	2016-12-26	拘留 逮捕	不存在明确被害人的纠纷												0	0	0
03092_48张某盗窃罪一审刑事判决书		简易			0	（2019）苏0282刑初48号	1	张某										务工		务工							2019-01-16	拘留 取保候审 拘留	不存在明确被害人的纠纷												0	0	0				1
03094_伊泽明、张晓林赌博罪一审刑事判决书					0	（2019）闽0424刑初70号	2	伊泽明	1964-11-19	完全刑事责任能力	1	55	0	1	汉族			无业		无业	宁化县	福建省宁化县	宁化县	中国	初中	2019-01-17	2019-05-05	拘留 逮捕	不存在明确被害人的纠纷												0	0	0
03095_被告人刘厚金贷款诈骗罪一审刑事判决书					0	涉案赌资129950元，予以没收，由缴获机关上缴国库	1	刘厚金										务农		务农		吉林省吉林市	吉林市			2016-04-26	2016-09-08	拘留 逮捕	其他存在明确被害人的纠纷												0	0	0
03097_秦忠遂贩卖毒品罪一审刑事判决书		简易			0	（2017）渝0103刑初745号	1	被告人	1976-10-19	完全刑事责任能力	1	41	1	1	汉族			无业		无业		重庆市渝中区	重庆市江北区			2017-05-28	2017-06-20	拘留 逮捕	不存在明确被害人的纠纷												0	0	0
03100_宋换茹危险驾驶一审刑事判决书		简易			0	（2018）豫0182刑初585号	1	宋换茹	1972-06-20	完全刑事责任能力	1	46	0	0	汉族			无业		无业			河南省郑州市中原区		初中	2018-08-14	2018-08-14	拘留 取保候审 逮捕	不存在明确被害人的纠纷												0	0	0				1
03102_张宏权贩卖毒品罪一审刑事判决书					0	（2014）安刑初字第342号	1	张宏权	1970-03-05	完全刑事责任能力	1	44	0	0	汉族			无业		无业	甘肃省定西市		定西市安定区	中国	初中	2014-09-03	2014-11-24	拘留 逮捕	不存在明确被害人的纠纷												0	0	0				1
03106_朱华忠走私、贩卖、运输、制造毒品罪一审刑事判决书		简易			0	（2017）苏0506刑初86号	1	朱华忠	1986-01-11	完全刑事责任能力	1	31	1	1	汉族			务农		务农		江苏省苏州市	江苏省苏州市吴中区		小学	2016-12-15	2017-02-07	拘留 逮捕	不存在明确被害人的纠纷												0	0	0
03107_徐文庭犯盗窃罪一审刑事判决书					0	（2014）资刑初字第106号	1	徐文庭	1968-03-12	完全刑事责任能力	1	46	1	1	汉族			务农		务农		湖南省益阳市			小学	2014-02-21	2014-04-24	逮捕	其他存在明确被害人的纠纷												0	0	0
03108_廖某山诈骗一审刑事判决书		简易			0	（2019）粤0404刑初45号	1	廖某山	1985-10-05	完全刑事责任能力	1	34			汉族						湖南省郴州市宜章县			中国	初中	2018-11-16	2019-02-01	拘留 逮捕	其他存在明确被害人的纠纷						侯星		1		广东常成律师事务所		0	0	0
03109_陈文明危险驾驶一审刑事判决书		简易			0	（2019）粤0507刑初223号	1	陈文明	1975-04-02	完全刑事责任能力	1	44			汉族			无业		无业	江西省会昌县			中国	小学		2019-03-04		不存在明确被害人的纠纷												0	0	0				1
03110_吴卫中非法持有毒品一审刑事判决书					0	（2018）沪0114刑初726号	1	吴卫中	1970-05-02	完全刑事责任能力	1	48			汉族						上海市闵行区			中国			2018-05-10								于朝勃		1		上海问学律师事务所		0	0	0
03115_姜磊猥亵儿童一审刑事判决书		简易			0	（2016）浙0212刑初54号	1	姜磊	1993-06-10	完全刑事责任能力	1	23			汉族			无业		无业		浙江省宁波市	宁波市鄞州区		普通高级中学	2015-07-01	2016-01-04	拘留 逮捕	其他存在明确被害人的纠纷												0	0	0
03116_张岩危险驾驶一审刑事判决书		速裁			0	（2019）京0107刑初27号	1	张岩	1980-11-09	完全刑事责任能力	1	39			汉族							北京市			高等专科学校		2019-01-10	拘留	不存在明确被害人的纠纷						刘雨桥				北京市齐进律师事务所		0	0	0				1		1
03117_李永青交通肇事一审刑事判决书		简易			0	（2017）京0115刑初1607号	1	李永青	1979-03-14	完全刑事责任能力	1	38						其他		司机	河北省张家口市怀安县	河北省怀安县		中国	初中	2017-12-13	2017-12-01	拘留 取保候审 逮捕	其他存在明确被害人的纠纷												0	0	0
03120_曾甲犯非法持有枪支罪一案二审刑事判决书			1		0	（2014）长中刑一终字第00434号	1	曾甲			1		0	0				无业		无业					大学本科	2014-03-17		拘留 逮捕	不存在明确被害人的纠纷						吴革飞				湖南高天律师事务所		0	0	0		1
03126_刘某志非法持有枪支二审刑事判决书				1	0	（2016）辽04刑终161号	1	刘某志	1962-06-06	完全刑事责任能力	1	54			满族			务农		务农			辽宁省清原满族自治县		初中	2016-01-27		拘留 逮捕	不存在明确被害人的纠纷						吴桂敏				辽宁晨星律师事务所		0	0	0		1
03127_曹某帮助犯罪分子逃避处罚一审刑事判决书					0	（2017）冀0983刑初200号	1	曹某	1995-09-05	完全刑事责任能力	1	22			回族			其他		辅警	河北省沧州市新华区		沧州市新华区	中国	普通高级中学		2017-05-27	拘留 取保候审	不存在明确被害人的纠纷												0	0	0				1
03128_魏建军盗窃一审刑事判决书		简易			0	（2014）西刑初字第10号	1	魏建军	1976-11-30	完全刑事责任能力	1	37			汉族							江西省南昌县			文盲	2013-09-06	2013-12-20	拘留 逮捕	其他存在明确被害人的纠纷												0	0	0				1
03132_贾新民危险驾驶罪一审刑事判决书					0	（2015）玉刑初字第00161号	1	贾新民	1966-05-25	完全刑事责任能力	1	49			汉族			无业		无业	内蒙古自治区呼和浩特市玉泉区		呼和浩特市玉泉区	中国	初中	2015-06-04	2015-05-18	拘留 取保候审 逮捕	不存在明确被害人的纠纷												0	0	0		1
03135_高某某犯绑架罪一审刑事判决书					0	（2014）靖刑初字第00253号	1	高某某	1988-05-15	完全刑事责任能力	1	26			汉族			务工		务工	陕西省子洲县	陕西省子洲县		中国	初中	2014-03-07	2014-05-19	拘留 逮捕	其他存在明确被害人的纠纷						高阿利	唐世伟			陕西驼城律师事务所	陕西驼城律师事务所	0	0	0				1
03136_史伊娜贩卖毒品一审刑事判决书		速裁			0	（2018）京0105刑初2652号	1	史伊娜	1980-02-03	完全刑事责任能力	0	38	1	1	汉族						北京市朝阳区			中国		2018-08-15	2018/0/0	拘留 逮捕	不存在明确被害人的纠纷												0	0	0
03137_吉克某甲非法持有枪支罪一审刑事判决书		简易			0	（2017）川3431刑初178号	1	吉克某甲	1947-10-03	完全刑事责任能力	1	72			彝族								昭觉县		文盲	2017-08-29	2017-09-11	拘留 逮捕	不存在明确被害人的纠纷												0	0	0
03139_路林昌危险驾驶一审刑事判决书					0	（2016）豫0581刑初523号	1	路林昌			1																2016-09-01	拘留 取保候审													0	0	0
03144_刘亚豪非法制造、买卖、运输、邮寄、储存枪支、弹药、爆炸物一审刑事判决书					0	（2017）豫1081刑初1019号	1	刘亚豪	1989-05-06	完全刑事责任能力	1	29			汉族			务农		务农			河南省禹州市		初中	2017-10-27	2017-12-05	拘留 逮捕 取保候审	不存在明确被害人的纠纷												0	0	0
03145_香伟昭贩卖毒品罪2016刑初1012一审刑事判决书		简易			0	（2016）粤0103刑初1012号	1	香某															广州市荔湾区			2016-08-19	2016-09-22	拘留 逮捕	不存在明确被害人的纠纷												0	0	0
03146_周某某非法持有枪支、弹药二审刑事判决书			1		0	（2015）中中法刑一终字第88号	1	周某某	1971-11-05		1	44			汉族			务农		务农		广东省中山市			初中			拘留 取保候审													0	0	0		1
03148_卢洪贵虚假诉讼罪一审刑事判决书		普通			0	（2019）闽0322刑初152号	1	卢洪贵	1976-11-21	完全刑事责任能力	1	43			汉族			无业		无业		福建省仙游县	仙游县		初中	2018-11-14	2019-03-01	拘留 逮捕	其他存在明确被害人的纠纷												0	0	0
03149_陈某某、吴某某走私、贩卖、运输、制造毒品一审刑事判决书		简易			0	（2017）沪0104刑初584号	2	陈某某			1				汉族						福建省			中国											徐倍歆		1		上海市铭源律师事务所		0	0	0
03150_王言盗窃罪一审刑事判决书					0	（2017）吉0322刑初190号	1	王言	1989-10-16	完全刑事责任能力	1	28			汉族			务农		务农			吉林省梨树县			2017-02-21	2017-04-27	拘留 逮捕	其他存在明确被害人的纠纷												0	0	0
03152_黄述军开设赌场罪一审刑事判决书		简易			0	（2019）桂1421刑初127号	1	黄述军	1972-04-17	完全刑事责任能力	1	47			汉族			无业		无业	广西壮族自治区扶绥县			中国	初中	2019-06-13	2019-08-16	拘留 逮捕	不存在明确被害人的纠纷												0	0	0
03156_饶传港走私、贩卖、运输、制造毒品一审刑事判决书					0	（2019）渝0112刑初30号	1	饶传港	1992-02-12	完全刑事责任能力	1	27			汉族			务农		务农		江西省横峰县	江西省横峰县		初中	2018-10-24		拘留 逮捕	不存在明确被害人的纠纷												0	0	0
03161_远星义、张铁功等人犯运输毒品罪二审刑事判决书					0	（2014）湘高法刑一终字第152号	3	远星义										其他		个体司机						2012-12-19		拘留 逮捕	不存在明确被害人的纠纷						陈科文		0		湖南金州律师事务所		0	0	0		1	1
03164_徐某诈骗罪、孙某掩饰、隐瞒犯罪所得罪一审刑事判决书		普通			0	（2015）威高刑初字第130号 公	2	徐某	1988-10-24	完全刑事责任能力	0	27	0	0	汉族		0	无业		无业	山东省平邑县	山东省平邑县	浙江省杭州市萧山区	中国	初中		2015-07-27	拘留 取保候审	其他存在明确被害人的纠纷												0	0	0				1
03165_149徐文涛盗窃罪一审刑事判决书		简易			0	（2017）苏1091刑初149号	1	徐文涛	1995-06-17	完全刑事责任能力	1	23			汉族			无业		无业		甘肃省合作市	甘肃省合作市		高等专科学校	2017-09-26	2017-09-21	拘留 逮捕 取保候审	其他存在明确被害人的纠纷												0	0	0				1
03167_陈禄林贩卖毒品一审刑事判决书		速裁			0	（2018）京0115刑初237号	1	陈禄林	1979-01-02	完全刑事责任能力	1	39									湖北省潜江市	湖北省潜江市	湖北省潜江市	中国		2017-11-15		拘留 逮捕	不存在明确被害人的纠纷												0	0	0				1		1
03171_许宝利交通肇事一审刑事判决书					0	（2016）冀0208刑初209号	1	许宝利	1963-03-31		1	53			汉族			其他		唐山市第一运输公司司机						2016-02-04	2016-06-24	拘留 逮捕	其他存在明确被害人的纠纷						赵晓明		0		河北陈大为律师事务所		0	0	0
03172_张建峰信用卡诈骗罪一审刑事判决书					0	（2017）晋0105刑初829号	1	张建峰	1983-02-13	完全刑事责任能力	1	34			汉族			其他		个体		山西省蒲县	山西省临汾市		大学本科	2017-03-29	2017-08-20	拘留 逮捕	其他存在明确被害人的纠纷						郭娟刚		0		山西金贝（临汾）律师事务所		0	0	0
03174_陈某甲、景某某、陈某乙犯倒卖土地罪一审刑事判决书		简易			0	（2014）岷刑初字第38号	3	陈某甲	1965-07-08	完全刑事责任能力	1	49			汉族			务农		务农			岷县		文盲	2013-06-21	2013-12-19	拘留 逮捕	不存在明确被害人的纠纷												0	0	0				1
03177_刘智、郭云等盗窃罪，吴道禹掩饰、隐瞒犯罪所得、犯罪所得收益罪一审刑事判决书					0	（2012）嘉海刑初字第771号	4	刘智										务农		务农						2012-06-08	2012-09-18	拘留 逮捕	其他存在明确被害人的纠纷												0	0	0
03179_刘吉云非法持有枪支案一审刑事判决书					0	（2014）江刑初字第30号	1	刘吉云	1973-10-30	完全刑事责任能力	1	41			汉族			务农		务农	云南省江川区			中国	小学	2013-12-17	2014-01-22	拘留 逮捕	不存在明确被害人的纠纷												0	0	0
03180_韩某寻衅滋事一审刑事判决书		普通			0	（2017）沪0104刑初438号	1	韩某			1				汉族						甘肃省陇南市		上海市宝山区	中国			2017-06-09		其他存在明确被害人的纠纷						徐倍歆		1		上海市铭源律师事务所		0	0	0
03181_肖炳荣走私、贩卖、运输、制造毒品一审刑事判决书					0	（2015）鄂武汉中刑初字第00145号	1	肖炳荣					0	0			0	无业		无业							2015-09-21	拘留 逮捕	不存在明确被害人的纠纷						方密		1		湖北博观律师事务所		0	0	0
03182_魏某非法持有、私藏枪支、弹药罪一审刑事判决书1					0	（2015）清刑初字第55号	1	魏某	1971-05-15	完全刑事责任能力	1	43	0	0	汉族		0	务农		务农	甘肃省清水县			中国	小学		2015-04-23	取保候审	不存在明确被害人的纠纷												0	0	0				1
03185_毛某某走私、贩卖、运输、制造毒品一审刑事判决书		简易			0	（2017）沪0109刑初1019号	1	毛某某	1957-05-31	完全刑事责任能力	1	60			汉族						上海市			中国			2017-10-23		不存在明确被害人的纠纷												0	0	0				1		1
03189_刘绍萍开设赌场一审刑事判决书					0	（2015）渝刑初字第00437号	1	刘绍萍	1982-09-30	完全刑事责任能力	0	33			汉族			无业		无业		江西省新余市	新余市		初中		2015-10-22	取保候审	不存在明确被害人的纠纷												0	0	0					1
03196_赵某走私、贩卖、运输、制造毒品一审刑事判决书					0	（2016）鄂0112刑初614号	1	赵某					0	0			0									2016-09-07	2016-12-06	拘留 逮捕	不存在明确被害人的纠纷						余某		0		湖北东吴弘泰律师事务所		0	0	0				1
03198_周海、戴某非法持有、私藏枪支、弹药一审刑事判决书		简易			0	（2016）桂0521刑初196号	2	周海					1	1			0	务农		务农						2015-11-22	2016-05-11	拘留 逮捕	不存在明确被害人的纠纷												0	0	0
03199_魏丹故意伤害一审刑事判决书		普通			0	（2015）西刑初字第132号	1	魏丹																		2017-03-21	2017-06-24	拘留 逮捕 取保候审	不存在明确被害人的纠纷												0	0	0
03204_范锦荣危险驾驶一审刑事判决书		简易			0	（2018）闽0821刑初254号	1	范锦荣	1971-10-30	完全刑事责任能力	1	47			汉族			无业		无业	长汀县	福建省长汀县	长汀县	中国	中专（包括职业高中，中等专业学校，技工学校）			取保候审	其他存在明确被害人的纠纷												0	0	0				1	1
03207_钟建权、王成友行贿一审刑事判决书					0	（2018）鄂1122刑初14号	2	钟建权	1976-03-15	完全刑事责任能力	1	42			汉族			其他		个体工商户					小学			拘留 取保候审	不存在明确被害人的纠纷												0	0	0
03210_被告人王某容留他人吸毒一审刑事判决书		简易			0	（2015）栖刑初字第70号	1	王某	1986-01-07	完全刑事责任能力	1	47	0	1	汉族		0											拘留 逮捕	不存在明确被害人的纠纷												0	0	0
03211_李廷燕贩卖毒品罪一审刑事判决书		简易转普通			0	2018）渝0118刑初506号	1	李廷燕	1973-02-28	完全刑事责任能力	0	45	0	1	汉族		0	无业		无业		重庆市永川区	重庆市永川区		初中	2018-11-16	2018-08-20	监视居住 逮捕	不存在明确被害人的纠纷												0	0	0
03213_章某犯协助组织卖淫罪一审刑事判决书					0	（2016）浙0324刑初48号	1	章某										无业		无业						2015-11-25	2016-01-12	拘留 逮捕	不存在明确被害人的纠纷												0	0	0				1		1
03214_杨某某侵犯著作权一审刑事判决书		简易			0	（2015）中一法知刑初字第5号	1	杨某某	1966-02-12	完全刑事责任能力	0	51	0	0	汉族		0	务农		务农	丰城市	江西省丰城市		中国	初中	2014-09-01	2014-12-22	拘留 逮捕	不存在明确被害人的纠纷						张博洋	罗春宝	0	0	广东中亿律师事务所	广东中亿律师事务所	0	0	0				1	1
03215_汉中市汉台区人民检察院诉刘辉强奸罪一审刑事判决书		简易			0	（2018）陕0702刑初37号	1	刘辉	1988-07-19	完全刑事责任能力	1	30			汉族										初中	2017-12-08		拘留 逮捕	其他存在明确被害人的纠纷												0	0	0
03220_谢某甲窝藏、包庇一审刑事判决书					0	（2019）赣1002刑初36号	1	谢某甲	1996-07-18	完全刑事责任能力	1	23			汉族			无业		无业		江西省抚州市	江西省抚州市临川区		初中	2018-08-06	2019-01-11	拘留 取保候审 逮捕	其他存在明确被害人的纠纷												0	0	0					1
03221_白学杰强奸罪一审刑事判决书					0	2018）川0104刑初448号	1	白学杰	1989-08-21	完全刑事责任能力	1	29															2018-05-21		其他存在明确被害人的纠纷												0	0	0
03222_廖某甲虚开增值税专用发票、用于骗取出口退税、抵扣税款发票一审刑事判决书		简易			0	（2016）粤0224刑初113号	1	廖某甲			1							其他		有限公司总经理	广东省深圳市龙华新区	广东省兴宁县	仁化县	中国	大学本科	2016-05-18	2016-08-08	拘留 逮捕 取保候审	不存在明确被害人的纠纷												0	0	0
03224_鲍伟行贿罪二审刑事判决书			1	0	0	（2015）扬刑二终字第00116号	1	鲍伟	1978-10-29		1	38			汉族			其他		其他		安徽省庐江县			高等专科学校	2013-08-08		取保候审 拘留 逮捕 取保候审	不存在明确被害人的纠纷						陈斌				江苏金长城律师事务所		0	0	0
03232_曲凤祖猥亵儿童罪一审刑事判决书					0	（2017）吉0282刑初298号	1	曲凤祖													桦甸市		桦甸市	中国			2018-01-04	取保候审	其他存在明确被害人的纠纷						李福山				吉林桦远律师事务所		0	0	0
03233_王军梅犯容留、介绍卖淫罪一审刑事判决书					0	（2015）南宛刑初字第42号	1	王军梅	1980-03-01	完全刑事责任能力	0	35			汉族			其他		个体商户			南阳市		初中	2014/9/31		拘留 逮捕	不存在明确被害人的纠纷						唐某某				北京市京国（南阳）律师事务所		0	0	0
03238_被告人胡里伟、胡星星犯销售假冒注册商标的商品罪一审刑事判决书					0	（2016）湘0211刑初97号	2	胡里伟	1983-09-25	完全刑事责任能力	1	33	0		汉族			其他		个体户	浙江省临海市		株洲县	中国	初中		2016-04-18	取保候审	不存在明确被害人的纠纷						伍佳				湖南中航律师事务所		0	0	0				1
03243_胡明鑫、姚伟亮盗窃罪一审刑事判决书					0	（2014）嘉南刑初字第810号	2	胡明鑫					1	1			0									2014-05-22	2014-08-13	拘留 逮捕	其他存在明确被害人的纠纷												0	0	0
03244_李某贩卖毒品一审刑事判决书		简易			0	（2018）沪0116刑初751号	1	李某	1977-05-19	完全刑事责任能力	1	41			汉族						上海市金山区		上海市金山区	中国			2018-07-09		不存在明确被害人的纠纷												0	0	0
03248_齐晓鹏贩卖毒品一审刑事判决书		简易			0	（2017）沪0112刑初1356号	1	齐晓鹏			1		0		汉族						河南省			中国			2017-07-21		不存在明确被害人的纠纷						王华男				上海市四方律师事务所		0	0	0				1		1
03253_王雁、倪泽秀生产、销售假药罪再审刑事判决书			0	1	0	（2019）渝01刑再4号	2	王雁	1969-03-13	完全刑事责任能力	1	50			汉族			其他		个体经营户			重庆市铜梁区		中专（包括职业高中，中等专业学校，技工学校）			取保候审	不存在明确被害人的纠纷												0	0	0	0	0	1
03255_余士君、余士龙犯挪用公款罪一案一审刑事判决书					0	（2009）潢民初字第425号	2	余士君		完全刑事责任能力	1	37															2009-10-28	取保候审	不存在明确被害人的纠纷												0	0	0
03256_胡川林贩卖毒品一审刑事判决书		简易			0	（2016）渝0114刑初391号	1	胡川林	1995-10-10	完全刑事责任能力	1	21			苗族			无业		无业	重庆市彭水县		重庆市黔江区	中国	初中	2016-11-01	2016-12-12	拘留 逮捕	不存在明确被害人的纠纷												0	0	0
03257_陈某交通肇事罪，陈某妨害作证罪一审刑事判决书		简易转普通			0	（2015）鄂西塞刑初字第00156号	1	陈某																		2015-06-12	2015-12-23	拘留 逮捕	其他存在明确被害人的纠纷						柯某				湖北湛月律师事务所		0	0	0
03258_卢建平抢劫罪一审刑事判决书					0	（2018）桂0225刑初165号	1	卢建平	1979-08-06	完全刑事责任能力	1	39			汉族							广西壮族自治区融水苗族自治县	融水苗族自治县		小学	2018-04-06	2018-07-12	拘留 逮捕	其他存在明确被害人的纠纷												0	0	0
03259_陈健勤走私、贩卖、运输、制造毒品一审刑事判决书		简易			0	（2018）闽0104刑初282号	1	陈健勤	1973-11-20	完全刑事责任能力	1	45	1	1	汉族		0	无业		无业		福建省福州市	福建省福州市晋安区		普通高级中学	2018-01-24	2018-04-18	拘留 逮捕	不存在明确被害人的纠纷												0	0	0				1
03260_251毛某危险驾驶罪一审刑事判决书		简易			0	（2019）苏0282刑初251号	1	毛某										其他		打工						2019-03-25	2019-03-07	逮捕 取保候审	不存在明确被害人的纠纷												0	0	0				1
03262_柴国全走私、贩卖、运输、制造毒品一审刑事判决书		简易			0	（2018）浙0102刑初128号	1	柴国全	1964-02-01	完全刑事责任能力	1	54			汉族			无业		无业	浙江省杭州市上城区			中国	初中	2017-09-22	2018-03-15	拘留 逮捕	不存在明确被害人的纠纷												0	0	0
03267_孙晓云贩卖毒品一审刑事判决书		简易			0	（2018）京0101刑初236号	1	孙晓云	1972-06-26	完全刑事责任能力	0	46			汉族			无业		无业		北京市	北京市西城区		普通高级中学	2018-06-21	2018-05-11	取保候审 逮捕	不存在明确被害人的纠纷												0	0	0
03268_冯新楼危险驾驶一审刑事判决书		简易			0	（2018）豫0212刑初152号	1	冯新楼	1980-09-19	完全刑事责任能力	1	38	0		汉族			务工		移动公司乡镇经理			开封市祥符区		普通高级中学		2018-05-15	取保候审	不存在明确被害人的纠纷												0	0	0				1
03272_郭某某危险驾驶罪一审刑事判决书		简易			0	（2014）新刑初字第389号	1	郭某某	1969-02-18	完全刑事责任能力	1	55			汉族			其他		无固定职业					小学		2014-10-15	逮捕 取保候审	不存在明确被害人的纠纷												0	0	0				1
03274_迟浩走私、贩卖、运输、制造毒品一审刑事判决书		简易			0	（2018）粤0113刑初876号	1	迟浩	1986-04-16	完全刑事责任能力	1	32	1	1	汉族		0				吉林省蛟河市			中国	普通高级中学	2018-02-13	2018-04-26	拘留 逮捕	不存在明确被害人的纠纷												0	0	0
03275_被告人杨杰犯故意伤害罪一案一审刑事判决书					0	（2015）涪刑初字第360号	1	杨杰																		2015-05-12	2015-07-16	逮捕	其他存在明确被害人的纠纷												0	0	0
03276_被告人韩某某犯招摇撞骗罪一案一审刑事判决书		普通			0	（2015）南法刑初字第11号	1	韩某某	1969-11-13	完全刑事责任能力	1	46			汉族			务工		务工					初中	2015-01-07	2015-02-11	拘留 逮捕	其他存在明确被害人的纠纷						夏凉锋	张多			湖南溥天律师事务所	湖南溥天律师事务所	0	0	0				1	1
03278_山西省临县人民法院 刑事判决书 （2015）临刑初字第162号					0	（2015）临刑初字第162号	2	李某某																			2015-07-08	监视居住	不存在明确被害人的纠纷												0	0	0
03281_成浪非法制造、买卖、运输、邮寄、储存枪支、弹药、爆炸物一审刑事判决书		简易			0	（2018）皖1126刑初304号	1	成浪	1990-08-14	完全刑事责任能力	1	28			汉族			务工		工人			安徽省凤阳县		初中	2018-09-20	2018-12-01	拘留 逮捕	不存在明确被害人的纠纷						孙广超				安徽凤明律师事务所		0	0	0				1	1
03286_杨某故意伤害一审刑事判决书		简易			0	（2018）苏0505刑初198号	1	杨某			1				汉族			其他		有限公司员工					普通高级中学	2017-10-12	2018-04-28	拘留 逮捕	其他存在明确被害人的纠纷												0	0	0
03290_郑某某盗窃罪一审刑事判决书		简易			0	（2018）粤5321刑初79号	1	郑某某	1982-06-28	完全刑事责任能力	1	36			汉族			无业		无业			广东省肇庆市四会市		初中	2018-02-08	2018-04-25	拘留 逮捕	其他存在明确被害人的纠纷						梁荣军		1		广东睿讯律师事务所		0	0	0
03291_苏巍走私、贩卖、运输、制造毒品一审刑事判决书		简易			0	（2019）鄂0116刑初259号	1	苏巍	1988-04-28	完全刑事责任能力	1	31			汉族			无业		无职业	武汉市洪山区	湖北省武汉市	武汉市黄陂区	中国	初中	2019-01-23	2019-04-01	拘留 逮捕	不存在明确被害人的纠纷												0	0	0				1
03293_被告人黄亮强奸罪一审刑事判决书					0	（2013）建刑初字第81号	1	黄亮	1984-02-11	完全刑事责任能力	1	29			汉族			其他		酒店经理	安徽省吉安县			中国	高等专科学校	2013-06-28	2013-06-20	拘留 逮捕 取保候审	其他存在明确被害人的纠纷						艾黎清				江苏苏砝律师事务所		0	0	0
03379_赵泽浩强奸一审刑事判决书					0	（2018）京0105刑初1170号	1	赵泽浩	1998-01-11	完全刑事责任能力	1	20			汉族			其他		其他	河北省沧州市海兴县			中国		2017-11-04	2018-06-04	拘留 逮捕							刘宇骁				北京市盈科律师事务所		0	0	0
03381_邓某1失火罪一审刑事判决书					0	（2017）内0426刑初128号	1	邓某1	1960-12-08	完全刑事责任能力	1	57			汉族			其他		其他	内蒙古自治区赤峰市		赤峰市	中国	大学本科		2017-06-01	拘留 取保候审	其他存在明确被害人的纠纷												0	0	0					1
03382_刘连伍、朱有富销售不符合安全标准的食品罪一审刑事判决书					0	（2016）辽0181刑初364号	2	刘连伍	1972-10-02	完全刑事责任能力	1	44			汉族							辽宁省新民市				2016-07-22	2016-07-18	逮捕 取保候审	不存在明确被害人的纠纷												0	0	0				1
03384_李同岑一审刑事判决书		简易			0	（2019）京0114刑初359号	1	李同岑	1955-03-15		1	64			汉族			务农		务农	黑龙江省鸡西市鸡东县	山东省		中国	初中		2019-04-01	取保候审	不存在明确被害人的纠纷												0	0	0				1
03385_庞展召骗取出口退税罪一审刑事判决书					0	（2019）浙0203刑初480号	1	庞展召	1985-09-07	完全刑事责任能力	1	34			汉族			其他		其他					初中	2018-02-14	2019-05-13	拘留 逮捕 取保候审	不存在明确被害人的纠纷						李卫				浙江越光律师事务所		0	0	0				1
03389_730赵大明、张黎良开设赌场罪一审刑事判决书		简易转普通			0	（2019）苏0282刑初730号	2	赵大明	1984-11-09	完全刑事责任能力	1	35			汉族			务工		务工	江苏省滨海县			中国	初中	2019-08-05	2019-07-01	逮捕 取保候审 拘留	不存在明确被害人的纠纷						蒋亚斌		1		宜兴市法律援助中心		0	0	0				1
03393_王燕走私、贩卖、运输、制造毒品罪一审刑事判决书		简易			0	（2018）渝0237刑初28号	1	王燕	1987-01-23	完全刑事责任能力	0	31			汉族			无业		无业	重庆市巫山县		重庆市巫山县	中国	普通高级中学	2018-01-15	2018-02-24	逮捕 拘留	不存在明确被害人的纠纷												0	0	0
03394_龙永寿盗窃罪二审刑事判决书			1		0	（2014）一中刑终字第1962号	1	龙永寿	1982-02-13	完全刑事责任能力	1	32	1	1												2013-12-13		逮捕 拘留	其他存在明确被害人的纠纷												0	0	0				1
03395_王贵海危险驾驶罪一审刑事判决书		简易			0	（2018）内0302刑初176号	1	王贵海	1958-01-15		1	60			汉族			其他		其他	乌海市	内蒙古自治区巴彦淖尔市	乌海市	中国	普通高级中学		2018-05-11	取保候审	不存在明确被害人的纠纷												0	0	0				1	1
03398_被告人张某某贩卖毒品一案一审刑事判决书		简易			0	（2018）辽0106刑初95号	1	张某某			1				汉族			无业		无业		辽宁省沈阳市	辽宁省沈阳市铁西区		初中	2017-09-29	2018-01-26	逮捕 拘留	不存在明确被害人的纠纷												0	0	0					1
03399_张运飞危险驾驶一审刑事判决书		简易			0	（2019）沪0112刑初1225号	1	张运飞	1998-05-06		1	21			汉族						安徽省阜阳市			中国			2019-07-12														0	0	0
03400_赵泓发故意伤害罪一审刑事判决书					0	（2019）桂0321刑初12号	1	赵泓发	1989-12-27		1	30			汉族			务农		务农		广西壮族自治区阳朔县			初中	2018-10-20	2019-01-11	逮捕 拘留	其他存在明确被害人的纠纷						阳睿敏	胡艳芳			广西寿阳律师事务所	广西寿阳律师事务所	0	0	1
03403_被告人王昌民犯强奸罪一审刑事判决书					0	（2017）湘3127刑初16号	1	王昌民	1962-08-10		1	55			土家族			其他		其他					初中	2016-06-23	2017-02-14	逮捕 拘留	其他存在明确被害人的纠纷												0	0	0
03404_杜全齐组织卖淫罪一审刑事判决书					0	2018）浙0122刑初444号	1	杜全齐	1989-01-02		1	29			汉族								安徽省阜南县		普通高级中学	2018-06-29	2018-12-21								吴军				浙江李双余律师事务所		0	0	0				1
03405_刘某某用资金罪一审刑事判决书		简易			0	（2017）苏0311刑初480号	1	刘某某	1972-12-28	完全刑事责任能力	1	45			汉族						徐州市泉山区		徐州市泉山区	中国	普通高级中学	2017-03-24	2017-11-30	逮捕 拘留	不存在明确被害人的纠纷						何燕燕				江苏彭邦律师事务所		0	0	0
03408_徐伟忠诈骗罪一审刑事判决书		简易			0	（2019）闽0702刑初227号	1	徐伟忠	1968-06-20	完全刑事责任能力	1	51	0	1	汉族			无业		无业	福建省厦门市海沧区	福建省厦门市		中国	小学	2019-03-21	2019-06-25														0	0	0
03410_张金松信用卡诈骗罪一审刑事判决书					0	2016）京0108刑初1550号	1	张金松	1987-05-08		1															2016-05-24	2016-08-08	逮捕 拘留	不存在明确被害人的纠纷												0	0	0				1
03413_黄某甲故意毁坏财物罪一审刑事判决书		简易转普通			0	（2019）苏0681刑初150号	1	黄某甲	1966-05-09	完全刑事责任能力	1	54						务农		务农			启东市				2019-03-18	取保候审	其他存在明确被害人的纠纷												0	0	0
03414_许某某诈骗一审刑事判决书		简易			0	（2018）津0103刑初229号	1	许某	1985-12-17		1	33			汉族			无业		无业		陕西省榆林市			普通高级中学	2018-01-19	2018-05-08	逮捕 拘留	其他存在明确被害人的纠纷												0	0	0
03421_郭济华拒不执行判决、裁定二审刑事判决书			1		0	（2017）赣08刑终332号	1	郭济华	1982-10-17		1				汉族							江西省吉水县			普通高级中学	2017-05-24															0	0	0
03422_柳发顺走私、贩卖、运输、制造毒品一审刑事判决书					0	（2016）云01刑初801号	1	柳发顺	1975-07-21	完全刑事责任能力	1	41			汉族										小学	2015-02-06	2015-06-05								孙雁卿				云南建耀律师事务所		0	0	0
03423_韦某鹏走私、贩卖、运输、制造毒品一审刑事判决书		简易			0	（2017）粤0113刑初1838号	1	韦某鹏	1992-02-13		1	25			壮族								广东省雷州市		小学	2017-07-11	2017-10-25														0	0	0				1
03424_周忠飞一审刑事判决书		速裁			0	（2019）粤0103刑初405号	1	周忠飞	1993-06-21		1	26			汉族								广东省雷州市		普通高级中学		2019-04-17	取保候审 拘留	不存在明确被害人的纠纷												0	0	0						1
03426_徐某贩卖毒品一审刑事判决书		简易			0	（2014）浦刑初字第290号	1	徐翔	1970-07-18		0	44			汉族			无业		无业	上海市浦东新区			中国	普通高级中学	2013-11-29	2014-01-06	逮捕 拘留	不存在明确被害人的纠纷												0	0	0
03429_田长春走私、贩卖、运输、制造毒品一审刑事判决书					0	（2016）云09刑初291号	1	田长春	1987-12-18		1	29			土家族			无业		无业			湖南省湘西土家族苗族自治州凤凰县		小学	2016-05-10	2016-08-05								王意军		1		云南通恒律师事务所		0	0	0
03430_班永点、班某甲非法持有、私藏枪支、弹药一审刑事判决书					0	（2015）隆刑初字第139号	1	班永点										务农		务农						2015-08-25	2015-08-24								黄佩锋		1		隆林各族自治县法律援助中心		0	0	0
03433_乐志远盗窃一审刑事判决书		简易			0	（2018）赣0602刑初462号	1	乐志远	1993-11-16		1	25			汉族								江西省贵溪市		中专（包括职业高中，中等专业学校，技工学校）		2018-12-21	取保候审 拘留	其他存在明确被害人的纠纷												0	0	0
03435_李某甲走私、贩卖、运输、制造毒品罪一审刑事判决书					0	（2017）晋0429刑初43号	1	李某甲	1981-07-26		1	36			汉族										初中	2017-04-20	2017-07-12	逮捕 拘留	不存在明确被害人的纠纷												0	0	0				1
03437_罗建走私、贩卖、运输、制造毒品罪一审一审刑事判决书		简易			0	（2016）渝0116刑初1024号	1	罗建	1966-07-09		1	50			汉族			无业		无业			重庆市江津区		初中	2016-09-28	2016-11-10	逮捕 拘留	不存在明确被害人的纠纷												0	0	0
03443_丁梦春盗窃一审刑事判决书		简易			0	（2018）湘0103刑初952号	1	丁梦春	1991-01-05	完全刑事责任能力	1	27	1	1	汉族			无业		无业	湖南省益阳市安化县			中国	初中	2018-04-04	2018-11-21	逮捕 拘留	其他存在明确被害人的纠纷												0	0	0				1		1
03444_吴振全盗窃一审刑事判决书					0	（2018）京0101刑初159号	1	吴振全	1972-05-24	完全刑事责任能力	1	36	1	1												2017-09-26		逮捕	其他存在明确被害人的纠纷												0	0	0
03449_覃权、田江等盗窃罪一审刑事判决书					0	（2011）夏刑初字第207号	4	覃权						1				无业		无业						2011-06-19	2011-09-08	拘留 逮捕	其他存在明确被害人的纠纷												0	0	0				1
03450_张建国危险驾驶案二审刑事判决书				1	0	（2016）内22刑终86号	1	张建某	1960-10-12	完全刑事责任能力	1	56			蒙古族			其他		个体工商户			科右前旗		初中			拘留 取保候审	不存在明确被害人的纠纷												0	0	0		1	0
03453_闵洁走私、贩卖、运输、制造毒品一审刑事判决书		简易			0	（2019）鄂0105刑初228号	1	闵洁	1982-01-21	完全刑事责任能力	0	37	1	1	汉族			无业		无业	武汉市汉阳区	武汉市		中国	中专（包括职业高中，中等专业学校，技工学校）	2019-01-18	2019-03-14	逮捕	不存在明确被害人的纠纷												0	0	0				1		1
03455_易某盗窃案案一审刑事判决书		简易			0	（2014）云刑初字第9号	1	易某	1968-02-07	完全刑事责任能力	1	28			汉族			其他		个体工商户					初中	2013-12-13	2014-01-14	拘留 逮捕	其他存在明确被害人的纠纷												0	0	0
03459_史伊娜贩卖毒品二审刑事判决书			1		0	（2019）京03刑终25号	1	史伊娜	1980-02-03	完全刑事责任能力	0	39		1												2018-08-15		拘留 逮捕	不存在明确被害人的纠纷												0	0	0		1	0
03460_袁2容留他人吸毒一审刑事判决书		简易			0	（2019）沪0106刑初807号	1	袁2	1962-04-29	完全刑事责任能力	0	57		1	汉族						上海市徐汇区		黄浦区	中国			2019-07-01		不存在明确被害人的纠纷						朱建华		1		北京盈科（上海）律师事务所		0	0	0
03467_董常法滥伐林木一审刑事判决书		简易			0	（2016）豫1726刑初263号	1	董常法			1				汉族			务农		务农			河南省驻马店市泌阳县			2016-04-29	2016-06-22	拘留 逮捕	不存在明确被害人的纠纷						钟启				河南盘古律师事务所		0	0	0				1	1
03469_被告人索某某故意伤害一审刑事判决书					0	（2014）祁刑初字第26号	1	索某某			1			0												2014-10-24	2014-12-15	拘留 逮捕	其他存在明确被害人的纠纷						高某某				青海湖光律师事务所		0	0	0				1	1
03470_林某犯故意伤害罪一审刑事判决书					0	（2015）甬海刑初字第479号	1	林某																			2015-09-11	取保候审	其他存在明确被害人的纠纷						章必湧						0	0	0
03471_被告人谢某某抢劫罪一审刑事判决书		简易			0	（2015）丰刑初字第412号	1	谢某某	1989-05-10	完全刑事责任能力	1				汉族			无业		无业		福建省泉州市丰泽区	泉州市		初中	2015-02-10	2015-05-22	拘留 逮捕	其他存在明确被害人的纠纷						李双阳	王梅霞			福建重宇合众（泉州）律师事务所	福建重宇合众（泉州）律师事务所	0	0	0
03474_王某某涉嫌抽逃出资罪一案再审刑事判决书	1		1		0	（2015）平刑再字第2号	1	王某某		完全刑事责任能力	1				汉族			其他		有限公司法定代表人	天津市东丽区		天津市东丽区	中国	普通高级中学			拘留 逮捕													0	0	0		1	0
03477_某、赵俊虚开增值税专用发票、用于骗取出口退税、抵扣税款发票罪一审刑事判决书					0	（2014）太刑二初字第00228号	2	某																			2014-09-22														0	0	0
03489_路运伟强奸一审刑事判决书					0	（2017）鲁1523刑初149号	1	路运伟	1981-03-16	完全刑事责任能力	1	36	1	1	汉族			务农	0	务农					小学	2017-05-11	2017-08-24	拘留 逮捕	家庭纠纷												0	0	0					1
03491_湖州怡和商标印刷有限公司、朱某甲等犯非法制造、销售非法制造的注册商标标识罪一审刑事判决书		普通			0	（2015）湖浔刑初字第82号	4	湖州怡和商标印刷有限公司																			2015-01-22		不存在明确被害人的纠纷												0	0	0
03492_郑某京诈骗罪再审刑事判决书					0	（2016）鲁1302刑再5号	1	郑某	1976-09-09	完全刑事责任能力	1				汉族			其他		个体工商户		山东省滕州市	临沂市兰山区		普通高级中学			拘留 逮捕	其他存在明确被害人的纠纷												0	0	0		1	0	1
03498_胡某危险驾驶一审刑事判决书		速裁			0	（2016）闽0206刑初1289号	1	胡某			1	28															2016-12-26	拘留 取保候审	不存在明确被害人的纠纷												0	0	0					1
03500_木塔尔·阿布来提盗窃罪一审刑事判决书					0	（2018）京0108刑初1028号	1	木塔尔·阿布来提	1989-10-21	完全刑事责任能力	1	29	1	1	维吾尔族			无业		无业	新疆维吾尔自治区柯坪县			中国	小学以下	2018-04-05		逮捕	其他存在明确被害人的纠纷												0	0	0				1
03501_袁树聪盗窃罪一审刑事判决书		简易			0	（2013）甬慈刑初字第2072号	1	袁树聪																		2013-09-29	2013-11-25	拘留 逮捕	其他存在明确被害人的纠纷												0	0	0
03506_金建华危险驾驶一审刑事判决书		速裁			0	（2019）沪0112刑初2240号	1	金建华			1				汉族						上海市闵行区			中国					不存在明确被害人的纠纷												0	0	0
03508_潘某故意伤害一审刑事判决书		普通			0	（2016）粤0703刑初395号	1	潘某			1				壮族								广西壮族自治区合山市		初中	2016-03-11	2016-06-20	拘留 逮捕	其他存在明确被害人的纠纷												0	0	0				1
03509_被告人孟凡成、范兴旺犯传播淫秽物品罪一审刑事判决书					0	（2015）武刑初字第31号	2	孟凡成	1991/0/0	完全刑事责任能力	1	24			汉族			其他		个体			山东省武城县		初中	2014-09-19	2015-04-09	拘留 逮捕 取保候审	不存在明确被害人的纠纷												0	0	0				1
03514_蔡文敏合同诈骗一审刑事判决书		速裁			0	（2018）京0112刑初694号	1	蔡文敏	1992-04-06	完全刑事责任能力	1	26			瑶族								湖南省永州市江华瑶族自治县				2018-08-15		其他存在明确被害人的纠纷												0	0	0				1		1
03596_吴国庆、徐现盗窃一审刑事判决书		普通			0	（2016）浙0381刑初1539号	3	吴国庆	1985-03-06	完全刑事责任能力	1	32			土家族			无业		无业		重庆市彭水苗族土家族自治县	重庆市彭水苗族土家族自治县		初中	2016-03-23	2016-07-27	拘留 逮捕	其他存在明确被害人的纠纷						姚均彪				浙江精武律师事务所		0	0	0				1
03597_汤学新容留他人吸毒罪一审刑事判决书		简易			0	（2017）苏0509刑初676号	1	被告人	1971-10-12	完全刑事责任能力	1	46			汉族			无业		无业			江苏省苏州市吴江区		小学	2017-04-18	2017-05-02	拘留 逮捕	不存在明确被害人的纠纷												0	0	0
03601_邱贵元贪污一案一审刑事判决书					0	（2014）康刑初字第2号	1	邱某某			1				汉族						甘肃省康县			中国	小学		2013-12-24	取保候审	不存在明确被害人的纠纷												0	0	0				1
03605_梁某潮故意伤害一审刑事判决书		简易			0	（2018）粤0703刑初700号	1	梁某潮	1986-09-11	完全刑事责任能力	1	32			汉族			其他		公司员工	广东省江门市新会区	广东省江门市		中国	中专（包括职业高中，中等专业学校，技工学校）		2018-10-19	拘留 取保候审	其他存在明确被害人的纠纷												0	0	0
03606_李志刚等非法拘禁罪一审刑事判决书					0	（2018）吉0502刑初244号	3	李志刚	1980-07-01	完全刑事责任能力	1	38			汉族			无业		无业	吉林省通化县		吉林省通化县	中国	初中	2018-06-01	2018-07-18	拘留 逮捕	其他存在明确被害人的纠纷						曲利				吉林通兴律师事务所		0	0	0				1	1
03609_张×交通肇事罪一审刑事判决书		简易			0	（2014）通刑初字第447号	1	张×	1970-12-11		1	43														2014-04-04	2014-04-21	拘留 逮捕	其他存在明确被害人的纠纷						陈铱				北京市大地律师事务所		0	0	0
03620_黄某某强迫卖淫罪一审刑事判决书		普通			0	（2015）秦少刑初字第3号	2	黄某某	1995-04-09	完全刑事责任能力	1	20			汉族			无业		无业		安徽省泗县	安徽省宿州市泗县		初中	2015-01-17	2015-05-01	拘留 逮捕	其他存在明确被害人的纠纷												0	0	0
03622_张玉华盗窃一审刑事判决书		简易			0	（2018）云0181刑初226号	1	张玉华	1971-05-10	完全刑事责任能力	1	47		1	汉族						云南省昆明市西山区		云南省安宁市	中国	初中		2018-04-26	取保候审	其他存在明确被害人的纠纷												0	0	0
03630_刘某走私、贩卖、运输、制造毒品罪一审刑事判决书		简易转普通			0	（2016）闽0206刑初1190号	1	刘某	1971-11-18	完全刑事责任能力	0	45			汉族			无业		无业	贵州省贵阳市花溪区			中国	高等专科学校	2016-09-14	2016-10-25	拘留 逮捕	不存在明确被害人的纠纷												0	0	0				1
03634_温钥犯抢劫罪秦某犯掩饰、隐瞒犯罪所得、犯罪所得收益罪一审刑事判决书		简易			0	（2015）嘉桐刑初字第318号	2	温某										务农		务农						2015-01-25	2015-03-11	拘留 逮捕	其他存在明确被害人的纠纷						陈强松		1		浙江国毅律师事务所		0	0	0
03644_王某伪造公司、企业、事业单位、人民团体印章一审刑事判决书		简易转普通			0	（2018）鲁0829刑初151号	1	王某	1972-08-09	完全刑事责任能力	1	46			汉族			无业		无业		青海省共和县	江苏省徐州市泉山区		大学本科		2018-06-07	拘留 取保候审	不存在明确被害人的纠纷												0	0	0
03647_王志强犯诈骗罪一审刑事判决书		简易			0	（2016）浙0103刑初556号	1	王志强																		2016-05-20	2016-09-03	拘留 逮捕	其他存在明确被害人的纠纷						应伟军				浙江金舟律师事务所		0	0	0
03653_王贵强奸罪一审刑事判决书					0	（2017）浙0784刑初1442号	1	王贵	1992-04-06	完全刑事责任能力	1	25			彝族			务农		务农		贵州省赫章县	贵州省赫章县		小学	2017-10-12	2017-12-15	拘留 逮捕	其他存在明确被害人的纠纷						应鹰		1		浙江泽大（永康）律师事务所		0	0	0				1
03655_李印辉一审刑事判决书		速裁			0	（2018）闽0203刑初480号	1	李印辉	1992-12-03	完全刑事责任能力	1	26			汉族			其他		公司员工	江西省广昌县			中国	中专（包括职业高中，中等专业学校，技工学校）	2018-02-24	2018-06-01	拘留 逮捕	其他存在明确被害人的纠纷						徐磊明				福建方与圆律师事务所		0	0	0
03658_王铮贪污、挪用公款案					0	原文未提供案号	1	王铮																																	0	0	0		1	0
03661_冯印生非法经营一审刑事判决书		普通			0	（2017）豫0821刑初855号	1	冯印生	1980-05-24	完全刑事责任能力	1	37			汉族			务农		务农		河南省武陟县	武陟县		初中	2017-05-27	2017-12-01	拘留 逮捕	不存在明确被害人的纠纷						王慧芳	吴卫红			河南苗硕律师事务所	河南国昌律师事务所	0	0	0					1
03662_查小四危险驾驶一审刑事判决书				1	0	（2018）冀0802刑初23号	1	查小四	1977-01-24	完全刑事责任能力	1	41			汉族			无业		无业			河北省承德市高新区		初中		2017-10-20	取保候审	其他存在明确被害人的纠纷												0	0	0	1				1
03663_熊炳明盗窃一审刑事判决书		简易			0	（2019）粤0113刑初1007号	1	熊炳明	1996-08-28	完全刑事责任能力	1	23	1	1	汉族						重庆市开县			中国	小学	2019-04-01	2019-06-10	拘留 逮捕													0	0	0				1
03664_高长平、杜居祥寻衅滋事罪一审刑事判决书					0	（2017）甘0826刑初1号	2	高长平			1				汉族			务农		务农		甘肃省庄浪县	庄浪县		小学	2016-08-23	2017-01-24	拘留 逮捕	其他存在明确被害人的纠纷						王剑						0	0	1
03667_李永源走私、贩卖、运输、制造毒品一审刑事判决书					0	（2018）鲁0481刑初219号	1	李永源	1988-09-29	完全刑事责任能力	1	30			汉族			无业		无业	山东省济宁市任城区	山东省济宁市	山东省济宁市高新区	中国	小学	2017-07-10	2018-03-20	拘留 逮捕	不存在明确被害人的纠纷						仲赪				山东民桥律师事务所		0	0	0
03670_赵顺利强奸罪一审刑事判决书		简易转普通			0	（2017）浙0602刑初770号	1	赵顺利	1993-06-28	完全刑事责任能力	1	24		0				务工		务工		山东省成武县	山东省成武县		小学	2017-05-24	2017-09-01	拘留 逮捕	其他存在明确被害人的纠纷						陈晓钦	侯恩江			山东文亭扶正律师事务所	山东文亭扶正律师事务所	0	0	1
03674_被告人牛XX犯非法侵入住宅罪一案一审刑事判决书					0	（2014）潭刑初字第21号	1	牛XX	1953-02-12	完全刑事责任能力	1	61			汉族											2014-06-03	2014-09-01	取保候审 逮捕							马爱虎				海南建亚律师事务所		0	0	0				1	1
03676_兰秀东、邓某某犯诈骗罪一审刑事判决书					0	（2015）江油刑初字第217号	2	兰秀东	1974-06-03	完全刑事责任能力	1	41	1	1	汉族			务农		务农	四川省平武县			中国	小学以下	2015-06-05	2015-06-04	拘留 逮捕	其他存在明确被害人的纠纷												0	0	0
03677_金某盗窃罪一审刑事判决书		普通			0	（2014）嘉桐刑初字第965号	1	金某																			2014-10-15	取保候审	其他存在明确被害人的纠纷						钱侃		1				0	0	0
03680_张国志故意毁坏财物罪一审刑事判决书		普通			0	（2018）辽0181刑初516号	1	张国志			1				汉族			无业		无业			辽宁省新民市		小学	2018-07-16	2018-11-27	拘留 逮捕	其他存在明确被害人的纠纷												0	0	0				1
03688_关于被告人张伟交通肇事一案一审刑事判决书					0	（2013）宛龙刑初字第236号	1	张伟	1974-09-21	完全刑事责任能力	1	39															2013-04-12		其他存在明确被害人的纠纷						杨贵				河南律师事务所		0	0	0				1	1
03689_肖捷斌走私、贩卖、运输、制造毒品一审刑事判决书		简易			0	（2017）闽0122刑初397号	1	肖捷斌	1993-01-03	完全刑事责任能力	0	24			汉族			无业		无业		连江县	福建省连江县		小学	2017-07-07	2017-09-29	拘留 逮捕	不存在明确被害人的纠纷												0	0	0
03692_王某甲非法经营一审刑事判决书					0	（2013）清刑初字第64号	1	王某甲	1958-05-18	完全刑事责任能力	1	55			汉族			务农		务农			清丰县		初中	2011/8/16#2013/4/7		逮捕 取保候审 监视居住 逮捕	不存在明确被害人的纠纷						王社花				河南导航律师事务所		0	0	0
03696_武占平危险驾驶罪一审刑事判决书					0	（2018）内0103刑初267号	1	武占平										无业		无业		内蒙古自治区呼和浩特市	内蒙古自治区呼和浩特市		普通高级中学			取保候审	不存在明确被害人的纠纷												0	0	0				1
03701_郭莹拒不支付劳动报酬罪一审刑事判决书		简易			0	（2018）渝0118刑初357号	1	郭莹	1981-04-24		1	37			汉族			其他		重庆某某汽车销售有限公司法定代表人、总经理					高等专科学校	2018-05-05	2018-06-14	拘留 监视居住 拘留 逮捕	其他存在明确被害人的纠纷												0	0	0				1
03702_陈彪陈红等寻衅滋事罪一审刑事判决书		普通			0	（2017）渝0242刑初188号	3	陈彪	1992-09-10	完全刑事责任能力	1	25											重庆市酉阳土家族苗族自治县					拘留 取保候审	其他存在明确被害人的纠纷												0	0	0					1
03708_王某某贩卖毒品一审刑事判决书		简易			0	（2017）苏0505刑初283号	1	王某某	1986-10-16	完全刑事责任能力	1	31			汉族										初中	2017-07-10	2017-07-06	取保候审 逮捕	不存在明确被害人的纠纷												0	0	0				1
03712_被告人张礼强犯容留他人吸毒罪一审刑事判决书					0	（2017）湘3122刑初42号	1	张礼强	1976-11-17		1	41											湖南省泸溪县				2017-05-19	监视居住	不存在明确被害人的纠纷												0	0	0					1
03714_赵卫春诈骗罪一审刑事判决书		简易			0	（2018）浙0104刑初294号	1	赵卫春	1975-02-28	完全刑事责任能力	1	43			汉族			无业		无业	陕西省西安市户县			中国	初中	2017-09-29	2018-03-27	拘留 逮捕	其他存在明确被害人的纠纷												0	0	0
03715_王某某容留他人吸毒案一审刑事判决书					0	（2015）凯刑初字第521号	1	王某某			1			1												2015-07-02	2015-11-13	拘留 逮捕	不存在明确被害人的纠纷												0	0	0				1
03716_冯某甲、曹某故意伤害一审刑事判决书		简易			0	（2016）冀0403刑初258号	6	冯某甲										无业		无业							2016-08-10		其他存在明确被害人的纠纷												0	0	0
03721_张魁君非法吸收公众存款罪一审刑事判决书					0	（2016）黑0110刑初199号	1	张魁君													哈尔滨市南岗区	哈尔滨市	哈尔滨市南岗区	中国		2015-08-26	2016-04-05	拘留 逮捕	其他存在明确被害人的纠纷						陈玉凤				黑龙江永拓律师事务所		0	0	0				1
03724_王涛涛盗窃罪一审刑事判决书		简易			0	（2014）迎刑初字第841号	1	王涛涛	1987-12-19	完全刑事责任能力	1	27	1	1	汉族			无业		无业		甘肃省泾川县	甘肃省泾川县		初中	2014-08-07	2014-11-07	拘留 逮捕	其他存在明确被害人的纠纷						霍俊斌		1		山西昭权律师事务所		0	0	0
03726_陆某某犯滥伐林木罪一审刑事判决书		简易			0	（2014）武刑初字第136号	1	陆某某	1962-10-04	完全刑事责任能力	1	52			汉族			务农		务农		江苏省泰兴市			小学		2014-07-08	取保候审	不存在明确被害人的纠纷						邱芝杰				福建弘袍律师事务所		0	0	0
03733_王顺海强奸罪一审刑事判决书		简易			0	（2016）浙0212刑初1363号	1	王顺海	1965-01-10	完全刑事责任能力	1	51			汉族			其他		无固定职业		湖南省永州市	湖南省永州市零陵区		小学	2016-06-23	2016-09-02	拘留 逮捕	其他存在明确被害人的纠纷						王孜霖	周颖慧			浙江贞信律师事务所	浙江贞信律师事务所	0	0	0
03735_张仁义、梁全林、梁太山、翟发现犯滥伐林木罪一案一审刑事判决书		简易			0	（2013）上少刑初字第88号	4	张仁义	1961/10/0	完全刑事责任能力	1	52															2013-03-15	取保候审	不存在明确被害人的纠纷												0	0	0
03739_韩某某信用卡诈骗一审刑事判决书					0	（2016）晋0828刑初61号	1	韩某某	1979-07-16	完全刑事责任能力	0	37			汉族			务农		务农	山西省运城市夏县			中国	初中	2016-06-21		拘留 逮捕	其他存在明确被害人的纠纷												0	0	0				1
03740_辛某某掩饰、隐瞒犯罪所得罪一审刑事判决书					0	（2014）古蔺刑初字第136号	1	辛某某	1990-10-01	完全刑事责任能力	1	24			汉族			务农		务农		四川省古蔺县			文盲	2014-03-13	2014-06-12	拘留 逮捕	不存在明确被害人的纠纷				0								0	0	0
03742_姜凯容留他人吸毒一审刑事判决书		简易			0	（2019）皖0881刑初15号	1	姜凯	1981-05-22	完全刑事责任能力	1	38			汉族			其他		安徽黄梅戏职业技术学院保卫科职工	安徽省安庆市大观区		安徽省安庆市大观区	中国	大学本科	2018-09-30	2019-01-02	拘留 逮捕	不存在明确被害人的纠纷						尹伟				安徽恒物律师事务所		0	0	0				1		1
03745_许帅伟妨害公务一审刑事判决书		速裁			0	（2017）豫0185刑初1244号	1	许帅伟	1979-08-24	完全刑事责任能力	1	38			汉族			其他		郑州市嵩阳煤机制造有限公司员工		河南省登封市	郑州市登封市		中专（包括职业高中，中等专业学校，技工学校）		2017-11-17	拘留 取保候审	其他存在明确被害人的纠纷						景俊娜				河南群达律师事务所		0	0	0				1
03748_李萌非法持有毒品一审刑事判决书		简易			0	（2018）鄂0106刑初217号	1	李萌	1976-11-11	完全刑事责任能力	1	42	1	1	汉族			无业		无业	湖北省武汉市武昌区	湖北省武汉市		中国	高等专科学校	2017-12-07	2018-03-01	拘留 逮捕	不存在明确被害人的纠纷												0	0	0
03749_郭某建犯危险驾驶罪刑事判决书		简易			0	（2017）粤0303刑初1778号	1	郭某建																					不存在明确被害人的纠纷												0	0	0				1		1
03752_陈海滨危险驾驶罪二审刑事判决书			1		0	（2018）浙07刑终1040号	1	陈海滨	1977-10-10	完全刑事责任能力	1	41			汉族							浙江省义乌市	义乌市		大学本科			取保候审	不存在明确被害人的纠纷												0	0	0		1	0
03753_公彦斌盗窃一审刑事判决书					0	（2017）京0101刑初722号	1	公彦斌	1970-10-23	完全刑事责任能力	1	47	1	1							黑龙江省哈尔滨市道外区	黑龙江省哈尔滨市		中国	初中	2017-09-29	2017-11-24	逮捕	其他存在明确被害人的纠纷						师国宝		1		北京市华龙律师事务所		0	0	0
03758_古交市人民检察院与陈某、马爱维交通肇事罪一审刑事判决书					0	（2018）晋0181刑初23号	1	马爱维	1971-04-26	完全刑事责任能力	1	47			汉族			其他		古交市矾石沟煤矿工人		古交市	古交市		小学	2018-03-02	2018-03-06	取保候审 逮捕	其他存在明确被害人的纠纷												0	0	1
03759_江勇容留他人吸毒一审刑事判决书					0	（2017）闽0111刑初456号	1	江勇	1977-07-13	完全刑事责任能力	1	40			汉族			其他		无固定职业	福建省福州市台江区	福建省福州市	福建省福州市台江区	中国	小学	2017-05-09	2017-08-02	拘留 逮捕	不存在明确被害人的纠纷												0	0	0
03760_洪锋抢劫罪一审刑事判决书					0	（2018）闽0103刑初89号	1	洪锋	1995-10-24	完全刑事责任能力	1	23			汉族			无业		无业	福建省闽侯县	福建省闽侯县		中国	初中	2017-09-04	2018-02-13	拘留 逮捕	其他存在明确被害人的纠纷						林仁瑞				福建联合信实（福州）律师事务所		0	0	0				1
03764_向勇容留他人吸毒罪一审刑事判决书		简易			0	（2017）渝0107刑初1104号	1	向勇			1				汉族											2017-10-23	2017-08-07	拘留 逮捕	不存在明确被害人的纠纷												0	0	0
03767_刘某某强奸一审刑事判决书		普通			0	（2017）鲁0982刑初314号	1	刘某某																			2017-07-21	拘留 取保候审	其他存在明确被害人的纠纷												0	0	0					1
03768_莫仁益容留他人吸毒一审刑事判决书		简易			0	（2017）桂1302刑初118号	1	莫仁益	1975-11-14	完全刑事责任能力	1	43	1	1	壮族			务农		务农	来宾市兴宾区		来宾市兴宾区	中国	初中	2017-12-26	2018-02-09	拘留 逮捕	不存在明确被害人的纠纷												0	0	0
03769_杨光亮、高亮走私、贩卖、运输、制造毒品罪一审刑事判决书		简易			0	（2016）渝0107刑初1551号	2	杨光亮	1969-10-21	完全刑事责任能力	1	47	1	1	汉族			无业		无业		重庆市巴南区			小学	2016-07-02	2016-11-22	拘留 逮捕	不存在明确被害人的纠纷												0	0	0
03770_王某某等人伪造公司印章一审刑事判决书					0	（2015）赛刑初字第00578号	3	王某某	1981-10-03	完全刑事责任能力	0	35			蒙古族						黑龙江省杜尔伯特蒙古族自治县	黑龙江省杜尔伯特蒙古族自治县	呼和浩特市玉泉区	中国	中专（包括职业高中，中等专业学校，技工学校）			拘留 取保候审	不存在明确被害人的纠纷												0	0	0				1	1
03780_韦裕仁强奸一审刑事判决书					0	（2017）桂0109刑初45号	1	韦裕仁	1974-03-25	完全刑事责任能力	1	43			壮族			务农		务农		广西壮族自治区南宁市	南宁市邕宁区		小学	2017-01-07	2017-04-21	拘留 逮捕	其他存在明确被害人的纠纷												0	0	0
03787_王亿、周凌达非法侵入计算机信息系统罪一审刑事判决书					0	（2019）浙0702刑初7号	2	王亿	1994-12-08	完全刑事责任能力	1	25			汉族							浙江省义乌市	浙江省金华市义乌市		大学本科	2018-08-27	2019-01-07	拘留 逮捕	不存在明确被害人的纠纷						姜洪				浙江八咏律师事务所		0	0	0				1	1
03788_王某职务侵占一审刑事判决书		普通			0	（2015）管刑初字第394号	1	王某	1985-11-12	完全刑事责任能力	1	30	0	0				其他		其他						2015-06-10	2015-08-01	拘留 逮捕	其他存在明确被害人的纠纷						祁向洲	李文磊			河南中锦律师事务所	河南中锦律师事务所	0	0	0
03794_张文泉故意伤害罪一审刑事判决书		普通			0	（2015）张刑初字第73号	1	张文泉		完全刑事责任能力								其他		其他			淄博市			2014-08-15	2015-02-09	拘留 逮捕	其他存在明确被害人的纠纷						王亮				山东远信律师事务所		0	0	1
03798_被告人刘某某、殷某某滥伐林木一案一审刑事判决书	1				0	（2015）威刑初字第197号	2	刘某甲(“刘五”）			1															2015-05-15	2015-09-28	取保候审	不存在明确被害人的纠纷												0	0	0
03801_林伟胜、林冰强贩卖毒品一审刑事判决书		简易			0	（2016）闽0111刑初656号	2	林伟胜	1972-12-01	完全刑事责任能力	1	44	0	1	汉族			无业		无业	福州市		福州市晋安区	中国	小学	2016-08-03	2016-11-08	拘留 逮捕	不存在明确被害人的纠纷												0	0	0
03802_赵丽红、宋明超开设赌场二审刑事判决书			1		0	（2019）冀11刑终135号	3	赵丽红	1986-10-20	完全刑事责任能力	0	33			汉族			务农		务农		河北省衡水市深州市	衡水市饶阳县		初中	2017-06-30	2019-01-24	拘留 逮捕 取保候审	不存在明确被害人的纠纷												0	0	0		1
03805_李全胜贩卖毒品一审刑事判决书		简易			0	（2018）京0105刑初1971号	1	李全胜	1968/0/0	完全刑事责任能力	1	50	1	1	汉族		1				北京市朝阳区	北京市		中国	初中	2018-06-28	2018-09-10	拘留 逮捕	不存在明确被害人的纠纷												0	0	0				1
03806_陈某某容留他人吸毒罪一审刑事判决书		简易			0	（2015）九法刑初字第00792号	1	陈某某			0				汉族											2015-04-17	2015-07-01	拘留 逮捕	不存在明确被害人的纠纷						刘雪翱				重庆伟豪律师事务所		0	0	0				1
03810_刘某、王某非法拘禁一审刑事判决书		简易			0	（2017）冀1127刑初4号	4	刘某（刘佳伟）	1990-05-28	完全刑事责任能力	1	27			汉族			无业		无业		黑龙江省哈尔滨市延寿县	衡水市桃城区		初中	2016-11-28	2017-01-03	拘留 逮捕	其他存在明确被害人的纠纷												0	0	0
03811_赵某犯强奸罪一审刑事判决书		普通			0	（2014）杭临刑初字第467号	1	赵某某																		2014-03-29	2014-06-26	取保候审	其他存在明确被害人的纠纷												0	0	0					1
03816_傅航强奸罪一审刑事判决书		普通			0	（2017）浙0681刑初798号	1	傅航	1978-05-11	完全刑事责任能力	1	39	0	0	汉族			务农		务农		浙江省诸暨市	诸暨市		小学	2017-04-14	2017-07-21	拘留 逮捕	其他存在明确被害人的纠纷						寿奇光		1		浙江靖光律师事务所		0	0	0
03817_杨金委强奸罪一审刑事判决书		简易			0	（2018）浙0226刑初119号	1	杨金委	1980-09-29	完全刑事责任能力	0	38						务农		务农		浙江省宁海县	宁海县		初中	2018-03-16	2018-03-16	拘留 取保候审 逮捕	其他存在明确被害人的纠纷						鲍玮琦		1		浙江中汇律师事务所		0	0	0
03820_曾某犯盗窃罪刑事判决书		简易			0	（2017）粤0303刑初1968号	1	曾某																					其他存在明确被害人的纠纷												0	0	0				1		1
03822_高少勇合同诈骗一审刑事判决书		普通			0	（2014）石刑初字第225号	1	高少勇	1984-02-09	完全刑事责任能力	1	30			汉族			无业		无业		新疆维吾尔自治区奎屯市			中专（包括职业高中，中等专业学校，技工学校）	2014-04-02	2014-06-12	拘留 逮捕	其他存在明确被害人的纠纷						孙新丽				新疆翰兴律师事务所		0	0	0					1
03830_康程强奸一审刑事判决书		普通			0	（2018）沪0115刑初3084号	1	康某	1988-06-12	完全刑事责任能力	1	30			汉族						上海市浦东新区		上海市浦东新区	中国			2018-08-08		其他存在明确被害人的纠纷						蔡某某				上海业盈律师事务所		0	0	0
03836_罗夏龙走私、贩卖、运输、制造毒品罪一审刑事判决书		简易			0	（2017）粤0303刑初2385号	1	罗夏龙	1988-06-10	完全刑事责任能力	1	29			汉族						广东省汕尾市海丰县			中国	大学本科	2017-11-08		拘留 逮捕	不存在明确被害人的纠纷						王彦玲	丁环			广东同仁律师事务所	广东同仁律师事务所	0	0	0				1		1
03839_陈言起、黄俏杰抢劫一审刑事判决书		简易转普通			0	（2018）粤1973刑初1053号	2	陈言起	1993-06-10	完全刑事责任能力	1	25			汉族			无业		无业	河南省周口市西华县			中国	小学	2018-02-12	2018-05-15	拘留 逮捕	其他存在明确被害人的纠纷						樊相帮				广东智宸律师事务所律师		0	0	0
03845_李运生、曹德培、曹雪军3ren盗窃一审刑事判决书					0	（2015）魏刑初字第354号	3	李运生			1																		其他存在明确被害人的纠纷						温学锋				河南烟城律师事务所		0	0	0
03848_于军盗窃一审刑事判决书		简易			0	（2016）京0105刑初552号	1	于军	1978-12-03	完全刑事责任能力	1	38			汉族			务农		务农	河北省保定市高阳县	河北省保定市		中国	初中	2016-02-25	2016-03-28	拘留 逮捕	其他存在明确被害人的纠纷												0	0	0				1
03850_黄某某侵犯著作权一审刑事判决书		简易			0	（2014）中一法知刑初字第6号	1	黄某某	1985-11-12	完全刑事责任能力	0	29			汉族			务农		务农	郁南县	广东省郁南县		中国	小学	2014-04-28	2014-04-25	取保候审	不存在明确被害人的纠纷												0	0	0
03851_刘卯盗窃一审刑事判决书		速裁			0	（2018）豫0191刑初16号	1	刘卯（刘江伟）	1989-08-04	完全刑事责任能力	1	29	0	0							河南省商水县	河南省商水县		中国	大学本科	2017-09-23		拘留 取保候审	其他存在明确被害人的纠纷						郭海涛		1		河南言东方律师事务所		0	0	0				1		1
03852_孔德敏犯受贿罪、贪污罪一审刑事判决书		普通			0	（2015）惠刑二初字第00038号	1	孔德敏																		2014-08-21	2015-04-16	拘留 逮捕	不存在明确被害人的纠纷						刘某						0	0	0
03857_被告人唐某某等人盗窃罪、掩饰隐瞒犯罪所得罪一审刑事判决书		简易			0	（2014）普刑初字第1114号	2	唐某某	1988-12-12	完全刑事责任能力	1	26			汉族			务农		务农	湖南省衡阳市	湖南省衡阳市		中国	普通高级中学	2014-08-14	2014-10-10	拘留 逮捕	其他存在明确被害人的纠纷												0	0	0
03859_上诉人娄红权抢劫一案的刑事判决书			1		0	（2015）宁刑终字第414号	1	娄红权	1989-03-15	完全刑事责任能力	1	26			汉族			无业		无业					高等专科学校	2015-02-16	2015-11-18	拘留 逮捕	其他存在明确被害人的纠纷						乔文标	仇晓萍			江苏诺法律师事务所	江苏诺法律师事务所	0	0	0		1	1
03862_许某诈骗一审刑事判决书		简易			0	（2017）粤0606刑初3080号	1	许某	1988-05-10	完全刑事责任能力	1	29			汉族			无业		无业	广西壮族自治区桂林市象山区			中国	高等专科学校	2017-05-25	2017-09-13	拘留 逮捕	其他存在明确被害人的纠纷						黄国根	袁正江			广东经纬法律师事务所	广东经纬法律师事务所	0	0	0
03871_范芳荣走私、贩卖、运输、制造毒品罪一审刑事判决书		简易			0	（2017）苏0509刑初183号	1	范芳荣	1988-06-18	完全刑事责任能力	1	29			汉族			无业		无业			江苏省苏州市吴江区			2017-02-09	2017-02-04	拘留 取保候审 逮捕	不存在明确被害人的纠纷												0	0	0
03875_王爱民犯故意伤害罪一案一审刑事判决书					0	（2011）平刑初字第139号	1	王爱民	1982-10-10	完全刑事责任能力	1	29			汉族			务农		务农		河南省信阳市平桥区			初中	2011-06-03	2011-06-20	拘留 逮捕 取保候审	其他存在明确被害人的纠纷												0	0	0				1	1
03877_何振山强奸一审刑事判决书		普通			0	（2018）京0114刑初575号	1	何振山	1984-02-12	完全刑事责任能力	1	34			汉族			务农		务农		河北省	河北省唐山市乐亭县			2018-05-05	2018-06-27	逮捕	其他存在明确被害人的纠纷						耿欣				北京市瑞都律师事务所		0	0	0
03882_被告人陆长胜犯贩卖毒品罪一审刑事判决书		简易			0	（2018）苏0116刑初15号	1	陆长胜	1956-02-12	完全刑事责任能力	1	60	1	1	汉族			无业		无业			江苏省南京市六合区		文盲		2018-01-19	监视居住	不存在明确被害人的纠纷												0	0	0
03887_被告人迟某某贩卖毒品一案一审刑事判决书		简易			0	（2017）辽0106刑初846号	1	迟某某	1968-11-24	完全刑事责任能力	1	50			汉族			无业		无业	辽宁省沈阳市和平区	辽宁省沈阳市		中国	初中	2017-09-07		拘留 逮捕	不存在明确被害人的纠纷												0	0	0				1		1
03888_杨发志走私、贩卖、运输、制造毒品一审刑事判决书		简易			0	（2018）鄂0104刑初932号	1	杨发志					1	1				其他		其他						2018-08-21	2018-11-26	拘留 逮捕	不存在明确被害人的纠纷						杨新堂				湖北立丰律师事务所		0	0	0				1
03889_张某犯职务侵占罪一审刑事判决书 (2)					0	（2015）西刑初字第00161号	1	张某										无业		无业							2015-03-09	拘留 取保候审	其他存在明确被害人的纠纷												0	0	0
03890_张晓红寻衅滋事一审刑事判决书					0	（2017）粤0606刑初2227号	1	张晓红	1995-10-27	完全刑事责任能力	0	22			汉族			务工		务工	四川省大英县			中国	初中		2017-07-12	取保候审	不存在明确被害人的纠纷						陈嘉祺				广东安南律师事务所		0	0	0				1
03891_李斌等走私、贩卖、运输、制造毒品罪一审刑事判决书		简易			0	（2016）京0102刑初709号	2	李X	1971-04-21	完全刑事责任能力	1	45														2016-04-19	2016-11-17	逮捕	不存在明确被害人的纠纷												0	0	0
03892_王飞鹏诈骗一审刑事判决书					0	（2017）浙0681刑初844号	1	王飞鹏	1995-08-23	完全刑事责任能力	1	22			汉族							湖南省临武县	湖南省郴州市临武县		初中		2017-07-28	拘留 取保候审	其他存在明确被害人的纠纷						吴建东				浙江永腾律师事务所		0	0	0
03893_吴东健一审刑事判决书					1	（2016）豫1626刑初380号	1	吴东健	1986-12-05	完全刑事责任能力	1	31			汉族								河南省长葛县			2016-11-02		逮捕	不存在明确被害人的纠纷						杨群周				河南德典律师事务所		0	0	0
03895_吴某某故意伤害一审刑事判决书					0	（2017）豫0225刑初451号	1	吴某某	1977-10-25	完全刑事责任能力	1	40			汉族			务农		务农			河南省兰考县		小学	2017-06-10	2017-08-16	拘留 逮捕	其他存在明确被害人的纠纷												0	0	0				1
03897_1067杨治平赌博罪一审刑事判决书		简易			0	（2017）苏0585刑初1067号	1	杨治平	1978-12-24	完全刑事责任能力	1	39	1	1	汉族			其他		其他			江苏省太仓市		中专（包括职业高中，中等专业学校，技工学校）			拘留 取保候审	不存在明确被害人的纠纷						李启龙				江苏德龙律师事务所		0	0	0				1	1
03898_张李平盗窃一审刑事判决书		简易			0	（2017）浙0424刑初331号	1	张李平	1983-10-16	完全刑事责任能力	1	34	1	1	汉族			无业		无业	浙江省海盐县		浙江省海盐县	中国	高等专科学校	2017-07-20	2017-10-09	拘留 逮捕	其他存在明确被害人的纠纷												0	0	0
03903_孙福全行贿再审刑事判决书				1	0	（2017）鲁1522刑再3号	1	孙福全	1972-05-22	完全刑事责任能力	1	46			汉族			其他		其他	山东省莘县	山东省莘县	山东省莘县	中国	初中	2015-08-14		拘留 逮捕 取保候审	不存在明确被害人的纠纷												0	0	0			1
03905_谢某某侵犯著作权一审刑事判决书		简易			0	（2014）中一法知刑初字第11号	1	谢某某	1973-04-06	完全刑事责任能力	1	41			汉族			务农		务农	广西壮族自治区陆川县	广西壮族自治区陆川县		中国	初中	2014-08-07	2014-09-29	拘留 逮捕	其他存在明确被害人的纠纷												0	0	0
03906_甘玉清盗窃罪一审刑事判决书		简易			0	2018）浙0702刑初68号	1	甘玉清	1962-12-09	完全刑事责任能力	1	56	1	1	汉族			无业		无业		江西省南昌市	江西省南昌市西湖区		文盲	2017-10-26	2018-01-25	拘留 取保候审 拘留 逮捕	其他存在明确被害人的纠纷												0	0	0				1
03908_从光洪走私、贩卖、运输、制造毒品一审刑事判决书		普通			0	（2018）沪0104刑初823号	1	从光洪	1997-11-27	完全刑事责任能力	1	21			汉族												2018-11-03		不存在明确被害人的纠纷						何棣伟	黄伟粱			上海国域达律师事务所	上海国域达律师事务所	0	0	0
03910_田讯犯盗窃罪一审刑事判决书					0	（2016）浙0411刑初207号	1	田讯					1	1												2016-01-07	2016-04-14	逮捕 拘留	其他存在明确被害人的纠纷						张林燕		1		浙江合德律师事务所		0	0	0
03913_黎某猥亵儿童案一审刑事判决书					0	（2015）上刑初字第174号	1	黎某			1				汉族			无业		无业		江西省上高县			普通高级中学	2015-07-17	2015-10-29	拘留 逮捕	其他存在明确被害人的纠纷												0	0	0
03914_姜在民走私、贩卖、运输、制造毒品一审刑事判决书		简易			0	（2017）鲁0211刑初1089号	1	姜在民	1989-11-01	完全刑事责任能力	1	28			满族			其他		其他	吉林省通化县	吉林省通化县	山东省青岛市黄岛区	中国		2017-01-07		拘留 逮捕	不存在明确被害人的纠纷												0	0	0
03919_李顺彪犯强奸罪一案一审刑事判决书					0	（2018）川3422刑初30号	1	李顺彪	1986-05-15	完全刑事责任能力	1	32			傣族			务农		务农	云南省沅县			中国	小学	2018-05-04	2018-07-24	拘留 逮捕	其他存在明确被害人的纠纷						何江		1		木里县法律援助中心		0	0	0				1	1
03920_江某非法持有、私藏枪支、弹药一审刑事判决书		简易			0	（2015）佛城法刑初字第1021号	1	江某			1		1	1	汉族			其他		其他	广东省佛山市禅城区			中国	中专（包括职业高中，中等专业学校，技工学校）	2015-09-25	2015-11-10	拘留 逮捕	不存在明确被害人的纠纷						范真子	李文			广东众淼律师事务所		0	0	0
03925_田某甲盗窃罪，田某乙、张某乙甲掩饰、隐瞒犯罪所得、犯罪所得收益罪一审刑事判决书		简易			0	（2014）嘉秀刑初字第567号	3	田某甲																		2014-04-11	2014-09-29	拘留 逮捕	其他存在明确被害人的纠纷												0	0	0
03927_俞建刚非法持有毒品罪一审刑事判决书		简易转普通			0	（2017）苏0583刑初1491号	1	俞建刚	1967-12-02	完全刑事责任能力	1	50			汉族			无业		无业			江苏省昆山市		小学		2017-08-10	取保候审	不存在明确被害人的纠纷												0	0	0
03928_赵×走私、贩卖、运输、制造毒品罪一审刑事判决书		简易			0	（2016）京0102刑初683号	1	赵x	1959-03-08	完全刑事责任能力	1	56														2006-06-16	2006-11-08	逮捕	不存在明确被害人的纠纷												0	0	0
03930_侯某某，蒋某盗窃一审刑事判决书		简易			0	（2014）黔法刑初字第00061号	2	侯某某	1990/0/0	完全刑事责任能力	1	24			土家族			无业		无业		湖北省咸丰县	湖北省咸丰县		初中	2013-11-25	2014-03-10	拘留 逮捕	其他存在明确被害人的纠纷												0	0	0
03933_王某某危险驾驶一审刑事判决书		简易			0	（2016）沪0106刑初1222号	1	王某某	1982-09-24	完全刑事责任能力	1	34			汉族						广东省潮州市		上海市静安区	中国			2016-12-05														0	0	0
03934_金向阳强奸罪一审刑事判决书		普通			0	（2017）浙0723刑初498号	1	金向阳	1966-10-11	完全刑事责任能力	1	51			汉族							浙江省武义县	浙江省武义县		初中	2017-09-12	2017-11-02	拘留 逮捕	其他存在明确被害人的纠纷						陶锡金				浙江中义律师事务所		0	0	0
03937_罗布盗窃罪一审刑事判决书		简易			0	（2017）藏0102刑初393号	1	罗布			1		1	1	藏族		0	务工		务工		西藏自治区山南市贡嘎县			文盲	2017-09-26	2017-12-21	拘留 逮捕	其他存在明确被害人的纠纷												0	0	0
03940_王某某猥亵儿童罪一审刑事判决书		简易			0	（2014）蜀刑初字第00354号	1	王某	1975-01-25	完全刑事责任能力	1	39			汉族			务农		务农	安徽省肥西县	安徽省肥西县	安徽省合肥市经济技术开发区	中国		2014-07-17	2014-09-17	拘留 逮捕	其他存在明确被害人的纠纷						刘新局	李建华			安徽金华安律师事务所	安徽金华安律师事务所	0	0	0				1
03942_袁冬平信用卡诈骗罪一审刑事判决书		简易转普通			0	（2015）深福法刑初字第562号	1	袁某										其他		有限公司员工			深圳市福田区			2014-12-24	2015-03-19	拘留 逮捕	其他存在明确被害人的纠纷						何再顺				广东普罗米修律师事务所		0	0	0
03945_蒋有方盗窃罪一审刑事判决书					0	（2012）舟岱刑初字第127号	1	蒋某					1	1												2012-09-18	2012-09-28	拘留 逮捕	其他存在明确被害人的纠纷												0	0	0				1
03947_彭某非法经营罪一审刑事判决书		普通			0	（2014）绍诸刑初字第796号	1	彭某										无业		无业							2014-07-17	取保候审	不存在明确被害人的纠纷												0	0	0
03950_崔某犯盗窃罪一审刑事判决书					0	（2016）苏1202刑初126号	1	崔某						1												2016-04-29	2016-04-28	拘留 取保候审 拘留 取保候审 逮捕	其他存在明确被害人的纠纷												0	0	0				1
03952_13孙见振故意伤害罪一审刑事判决书		简易转普通			0	（2019）苏0282刑初13号	1	孙见振					1	1			0	务工		务工						2018-09-30	2019-01-07	拘留 逮捕	其他存在明确被害人的纠纷						左国平				江苏鼎一律师事务所		0	0	1
03954_韩凯贩卖毒品罪一审刑事判决书		简易			0	（2016）渝0103刑初1834号	1	韩凯	1954-07-29	完全刑事责任能力	1	62		1	汉族			无业		无业			重庆市渝中区		初中	2016-12-07	2016-12-01	取保候审 逮捕	不存在明确被害人的纠纷												0	0	0
03957_蔡文彬盗窃罪一审刑事判决书					0	（2011）杭下刑初字第129号	1	蔡文彬					0	0												2010-12-30	2011-02-25	拘留 逮捕	其他存在明确被害人的纠纷						蔡文娟						0	0	0				1
03959_沈周锋犯诈骗罪一审刑事判决书					0	（2016）浙0702刑初1104号	1	沈某甲	1981-11-17	完全刑事责任能力	1	35	1	1	汉族		0	务农		务农		浙江省金华市	金华市婺城区		初中	2016-03-17	2016-09-06	拘留 逮捕	其他存在明确被害人的纠纷												0	0	0
03960_ＸＸ新走私、贩卖、运输、制造毒品罪一审刑事判决书		简易			0	（2018）辽0102刑初325号	1	XX新	1968-01-16	完全刑事责任能力	1	50			汉族			无业		无业	辽宁省沈阳市和平区	辽宁省沈阳市	辽宁省沈阳市和平区	中国	初中	2017-10-20	2018-03-26	拘留 逮捕	不存在明确被害人的纠纷												0	0	0					1
03965_郝红伟非法吸收公众存款二审刑事判决书			1		0	（2018）黔01刑终508号	1	郝红伟	1967-02-08	完全刑事责任能力	1	51	0	0	汉族			其他		有限公司实际控制人	贵州省贵阳市云岩区			中国	高等专科学校			取保候审	其他存在明确被害人的纠纷						孙向东	蒋波			贵州东舸律师事务所	贵州黔鹰律师事务所	0	0	0		1	0		1
03968_尹尚琴贩卖毒品一审刑事判决书		简易			0	（2016）闽0111刑初678号	1	尹尚琴	1979-03-25	完全刑事责任能力	0	37			汉族			无业		无业		贵州省平坝县	贵州省平坝县		初中	2016-09-13	2016-11-17	拘留 逮捕	不存在明确被害人的纠纷												0	0	0				1
03969_林dd非法占用农用地罪一审刑事判决书					0	（2019）闽0181刑初170号	1	林俤俤	1977-10-27	完全刑事责任能力	1	42			汉族			其他		经商			福建省福清市		初中		2019-01-25	取保候审	不存在明确被害人的纠纷												0	0	0				1	1	1
03975_赵旺明假冒注册商标罪一审刑事判决书		普通			0	（2017）粤0306刑初1989号	1	赵旺明	1990-01-04	完全刑事责任能力	1	27			汉族								湖南省邵阳市邵东县		普通高级中学			拘留 取保候审	其他存在明确被害人的纠纷												0	0	0					1
03979_李某甲犯盗窃罪一审刑事判决书	1	简易			0	（2014）五刑初字第00179号	1	李某甲								0			1								2014-06-11		其他存在明确被害人的纠纷						张瑶		1		安徽君智律师事务所		0	0	0				1
03983_朱守银危险驾驶一审刑事判决书		速裁			0	（2019）京0107刑初22号	1	朱守银	1974-08-30	完全刑事责任能力	1	45			汉族						安徽省淮南市田家庵区	安徽省淮南市	北京市石景山区	中国	中专（包括职业高中，中等专业学校，技工学校）		2019-01-08	拘留	不存在明确被害人的纠纷												0	0	0
03985_金某走私、贩卖、运输、制造毒品一审刑事判决书		简易			0	（2018）沪0114刑初638号	1	金某	1977-04-08	完全刑事责任能力	1	41	1	1	汉族		0				上海市宝山区		上海市宝山区	中国			2018-04-27		不存在明确被害人的纠纷												0	0	0
03988_肖某、秦某等组织考试作弊罪、代替考试罪一审刑事判决书		简易			0	（2016）赣0102刑初548号	7	肖某			0															2016-05-25	2016-08-25	拘留 逮捕	不存在明确被害人的纠纷						刘胜波				北京市盈科（南昌）律师事务所		0	0	0
03989_史某某交通肇事一审刑事判决书					0	（2016）冀0821刑初55号	1	史某某																		2016-01-11	2016-02-19	拘留 逮捕	其他存在明确被害人的纠纷												0	0	0				1
03990_阿力帕尔·阿布都热别克强奸一审刑事判决书		简易			0	（2018）沪0113刑初104号	1	阿力帕尔·阿布都热别克	1996-02-18	完全刑事责任能力	1	22			哈萨克族						新疆维吾尔自治区新源县			中国			2018-01-11		其他存在明确被害人的纠纷						吾买尔江·买买提				北京同一源（上海）律师事务所		0	0	0
03991_宋艳荣故意伤害一审刑事判决书					0	（2018）京0105刑初65号	1	宋艳荣	1970-11-15	完全刑事责任能力	0	38			汉族			无业		无业	北京市朝阳区	北京市		中国	中专（包括职业高中，中等专业学校，技工学校）		2018-01-02	拘留 取保候审	家庭纠纷						陈荣胜				北京伯彦律师事务所		0	0	0
03992_373刘某犯引诱、容留、介绍卖淫罪一审刑事判决书		简易			0	（2016）粤0303刑初373号	1	刘某																			2016-03-03	取保候审	不存在明确被害人的纠纷												0	0	0				1	1
03993_梁×等虚开增值税专用发票罪一审刑事判决书					0	（2015）海刑初字第1289号	2	北×															北京市朝阳区				2015-05-29		不存在明确被害人的纠纷						张乐				北京市百瑞律师事务所		0	0	0
03997_韩某甲诈骗、盗窃一审刑事判决书		简易			0	（2015）盐刑初字第152号	1	韩某甲										务农		务农						2015-02-04	2015-09-30	拘留 逮捕	其他存在明确被害人的纠纷												0	0	0				1
04000_张云符林飞等销售假药罪一审刑事判决书		简易			0	（2017）渝0241刑初248号	3	符林飞	1987-10-21	完全刑事责任能力	1	30			汉族			其他		药品销售员		重庆市秀山土家族苗族自治县	重庆市秀山土家族苗族自治县		小学	2017-09-29		拘留 逮捕	不存在明确被害人的纠纷												0	0	0
04002_梅某波犯危险驾驶罪刑事判决书		简易			0	（2017）粤0303刑初1989号	1	梅某波					0	0															不存在明确被害人的纠纷						杨晓明						0	0	0				1	1	1
04003_李建荣犯非法吸收公众存款罪一审刑事判决书					0	（2015）诸刑初字第423号	1	李建荣						1												2015-01-28	2015-10-10	拘留 逮捕	其他存在明确被害人的纠纷						孟庆波						0	0	0				1
04004_杨某坤犯贩卖毒品罪刑事判决书		简易			0	（2017）粤0303刑初1897号	1	杨某坤					1	1			0												不存在明确被害人的纠纷												0	0	0				1
04005_李某甲犯故意毁坏财物罪、容留他人吸毒罪一审刑事判决书					0	（2016）鄂9006刑初159号	1	李某甲										务工		务工						2015-12-23	2016-05-30	拘留 逮捕	其他存在明确被害人的纠纷												0	0	0
04012_405卢士红盗窃罪一审刑事判决书		简易			0	（2018）苏1282刑初405号	1	卢士红										无业		无业						2018-08-03	2018-07-16	取保候审 逮捕	其他存在明确被害人的纠纷												0	0	0
04014_朱某走私、贩卖、运输、制造毒品一审刑事判决书					0	（2015）珠香法刑初字第61号	1	朱某			1				汉族						广西壮族自治区宾阳县			中国	小学	2014-10-17	2011-05-16	拘留 逮捕	不存在明确被害人的纠纷												0	0	0				1
04016_吴建秋危险驾驶一审刑事判决书		简易			0	（2019）赣1127民初130号	1	吴建秋	1983-07-19	完全刑事责任能力	1	36	0	0	汉族			务工		务工	江西省上饶市余干县		余干县	中国	小学		2019-04-15	取保候审	不存在明确被害人的纠纷												0	0	0				1	1
04019_何勇楚盗窃案一审刑事判决书					0	（2014）包刑初字第00319号	1	何勇楚	1978-12-05	完全刑事责任能力	1	36	1	1	汉族		0	无业		无业	湖南省道县			中国	小学	2014-01-23	2014-04-02	拘留 逮捕	其他存在明确被害人的纠纷			1	0		姚自德				安徽国天律师事务所		0	0	0				1
04022_张奕何强奸一审刑事判决书					0	（2017）粤2071刑初1400号	1	张奕何	1958-01-11	完全刑事责任能力	1	59			汉族			其他		个体工商户	阳春市	广东省阳春市		中国	普通高级中学	2017-03-29	2017-06-20	拘留 逮捕	其他存在明确被害人的纠纷												0	0	0
04024_李清付强奸一审刑事判决书		简易			0	（2018）川1525刑初140号	1	李清付	1969-10-14	完全刑事责任能力	1	49										四川省高县	四川省高县		文盲	2018-01-31	2018-07-02	拘留 逮捕	其他存在明确被害人的纠纷												0	0	0				1
04025_来让泽仁与甲它拉姆妨害公务罪二审刑事判决书			1		0	（2017）青01刑终108号	2	来让泽仁	1981-11-15	完全刑事责任能力	1	36			藏族			无业		无业	四川省九龙县	四川省九龙县	青海省西宁市	中国	小学	2017-02-17		拘留 逮捕	其他存在明确被害人的纠纷												0	0	0		1	0	1	1
04029_陈某某走私、贩卖、运输、制造毒品一审刑事判决书		简易			0	（2016）津0102刑初359号	1	陈某某			1				彝族						四川省盐源县			中国		2016-08-05	2016-11-01	拘留 逮捕	不存在明确被害人的纠纷												0	0	0
04030_李清元强奸一审刑事判决书		简易			0	（2018）闽0582刑初1750号	1	李清元	1982-03-04	完全刑事责任能力	1	36			汉族			务农		务农		贵州省毕节市	毕节市		初中	2018-06-27	2018-07-16	拘留 逮捕	其他存在明确被害人的纠纷												0	0	0
04035_何永德诈骗罪一审刑事判决书		简易			0	（2018）苏0581刑初1616号	1	何永德	1989-12-03	完全刑事责任能力	1	29			瑶族			务农		务农		广西壮族自治区南丹县	广西壮族自治区南丹县		文盲	2018-07-31		拘留 逮捕	其他存在明确被害人的纠纷												0	0	0
04037_岳忠云王勇非法捕捞水产品一审刑事判决书					0	（2018）渝0114刑初265号	2	王勇	1982-06-30	完全刑事责任能力	1	36			汉族			务工		务工		重庆市璧山区	重庆市璧山区		高等专科学校			取保候审	不存在明确被害人的纠纷												0	0	0
04042_房金贤一审刑事判决书		简易			0	（2019）粤0303刑初371号	1	房金贤	1973-08-18	完全刑事责任能力	1	46			汉族			无业		无业	广东省惠来县		罗湖区	中国	小学	2018-12-29		拘留 逮捕	不存在明确被害人的纠纷						胡海兵	田珊			广东晟典律师事务所	广东晟典律师事务所	0	0	0				1
04044_被告人张浩犯寻衅滋事罪一审刑事判决书		简易转普通			0	（2018）川1724刑初74号	1	张浩	1998-03-25	完全刑事责任能力	1	20	0	0	汉族						四川省大竹县	四川省大竹县		中国	小学	2018-02-13	2018-05-25	拘留 逮捕	其他存在明确被害人的纠纷						尹麒栋				四川法之缘律师事务所		0	0	0
04047_李甲宾寻衅滋事罪一审刑事判决书		简易			0	（2017）吉0702刑初231号	1	李甲宾			1												宁江区				2017-05-22	取保候审	其他存在明确被害人的纠纷												0	0	0
04048_被告人孙丰云妨害作证一审刑事判决书			1		0	（2014）方刑初字第060号	1	孙丰云	1972/0/0	完全刑事责任能力	0	42											河南省方城县			2013-09-03	2013-11-25	拘留 取保候审 逮捕 取保候审 逮捕	不存在明确被害人的纠纷						姚长军				河南雷雨律师事务所		0	0	0	1			1
04054_温某故意伤害罪一审刑事判决书		普通			0	（2018）苏0205刑初527号	1	温从江		完全刑事责任能力			0	0				其他		其他						2018-07-24	2018-10-15	拘留 逮捕	其他存在明确被害人的纠纷						顾俊杰		1		江苏智和律师事务所		0	0	1				1
04057_于乐飞危险驾驶一审刑事判决书					0	（2018）鲁1083刑初68号	1	于乐飞	1979-01-21	完全刑事责任能力	1	39			汉族			其他		有限公司职工	山东省乳山市		山东省乳山市	中国	初中		2018-02-26	取保候审	不存在明确被害人的纠纷												0	0	0
04058_薛小明盗窃一审刑事判决书					0	（2017）渝0117刑初572号	1	薛小明			1				汉族							重庆市合川区	重庆市合川区		初中	2017-09-06		拘留 监视居住 逮捕	其他存在明确被害人的纠纷												0	0	0
04060_冉宁艳容留他人吸毒罪一审刑事判决书		普通			0	（2017）渝0242刑初162号	1	冉宁艳	1996-04-15	完全刑事责任能力	0	21											酉阳土家族苗族自治县					取保候审 逮捕 监视居住	不存在明确被害人的纠纷												0	0	0
04062_刘某犯非法经营罪一审刑事判决书					0	（2016）冀0203刑初134号	1	刘某		完全刑事责任能力								其他		个体工商户						2015-08-28	2016-05-06	拘留 逮捕 取保候审	不存在明确被害人的纠纷						王贺利				河北佳诚信和律师事务所		0	0	0
04064_陈阿朝、林乃明、林必榴走私、贩卖、运输、制造毒品罪一审刑事判决书					0	（2019）浙0327刑初456号	3	林乃明	1977-04-18	完全刑事责任能力	1	42	1	1	汉族		0	务农		务农		福建省福鼎市	福鼎市		小学	2019-03-28	2019-05-06	拘留 逮捕	不存在明确被害人的纠纷						赖振国		1		浙江中欣律师事务所		0	0	0
04066_周某犯故意伤害罪、重婚罪一审刑事判决书		简易			0	（2016）浙0381刑初936号	1	周某		完全刑事责任能力																2015-12-29	2016-05-04	拘留 逮捕	其他存在明确被害人的纠纷												0	0	1
04073_王某犯危险驾驶罪一审刑事判决书					0	（2016）鲁1082刑初69号	1	王某										无业		无业							2016-01-21	取保候审	不存在明确被害人的纠纷												0	0	0
04079_马凤霞强迫卖淫一审刑事判决书					0	（2012）文少刑初字第29号	1	马凤霞	1996-02-18	完全刑事责任能力	0	16			汉族			无业		无业			河南省安阳市北关区		中专（包括职业高中，中等专业学校，技工学校）	2012-06-12	2012-09-12	拘留 逮捕	其他存在明确被害人的纠纷						王某				河南至尊律师事务所		0	0	0
04083_郭某盗窃罪一审刑事判决书		简易			0	（2016）浙1181刑初272号	1	郭某			1		1	1	汉族		0	务农		务农					初中	2016-10-10	2016-12-08	拘留 逮捕	其他存在明确被害人的纠纷												0	0	0
04085_张德来交通肇事二审刑事判决书			1		0	（2019）黑08刑终82号	1	张德来	1971-11-06	完全刑事责任能力	1	48			汉族			务农		务农	黑龙江省富锦市	黑龙江省富锦市		中国	初中	2019-04-10		取保候审 逮捕	其他存在明确被害人的纠纷						李沐		1		黑龙江昕会律师事务所		0	0	0		1	0	1	1
04088_徐丽华走私、贩卖、运输、制造毒品一审刑事判决书		速裁转简易			0	（2017）鄂0103刑初1050号	1	徐丽华	1964-08-28	完全刑事责任能力	0	53	1	1	汉族		0	务农		务农	江汉区	湖北省武汉市		中国	初中	2017-05-25	2017-08-10	拘留 逮捕	不存在明确被害人的纠纷												0	0	0
04092_某某公司、华某虚开增值税专用发票一审刑事判决书					0	（2015）鄂大冶刑初字第00092号	2	某某公司																			2015-01-16		不存在明确被害人的纠纷												0	0	0
04093_刘登翠、巫章辉伪造、变造、买卖国家机关公文、证件、印章一审刑事判决书					0	（2019）川1325刑初123号	2	刘登翠	1965-12-18	完全刑事责任能力	0	54	0	0	汉族						海南省海口市美兰区			中国	初中	2019-05-01	2019-07-25	拘留 逮捕	不存在明确被害人的纠纷						罗耀				四川罡正律师事务所		0	0	0
04094_四度格布盗窃一审刑事判决书		速裁			0	（2018）京0105刑初2467号	1	四度格布	1984-01-26	完全刑事责任能力	1	34			彝族						四川省喜德县			中国	高等专科学校	2018-08-03	2018-11-12	拘留 逮捕	其他存在明确被害人的纠纷												0	0	0				1		1
04098_被告人郭跃辉犯盗窃罪一案一审刑事判决书					0	（2012）登刑初字第53号	1	郭跃辉			1															2011-10-21	2011-12-05	拘留 逮捕	其他存在明确被害人的纠纷												0	0	0				1
04102_128林某盗窃罪一审刑事判决书		简易转普通			0	（2019）苏1111刑初128号	1	林某										无业		无业						2018-12-13	2019-06-25	拘留 逮捕	不存在明确被害人的纠纷						闫钧		1		力挽律师事务所		0	0	0
04116_吴瑞珍诈骗一审刑事判决书		简易			0	（2018）闽0524刑初3号	1	吴瑞珍	1986-04-25	完全刑事责任能力	0	32			汉族			无业		无业			安溪县		小学	2017-10-26	2018-01-02	拘留 逮捕	其他存在明确被害人的纠纷						陈战英				福建安荣律师事务所		0	0	0				1	1
04118_张海成妨害公务罪一审刑事判决书					0	（2016）苏0924刑初523号	1	张海成	1984-12-10	完全刑事责任能力	1	32			汉族			其他		渔民			射阳县		小学	2016-12-05	2016-12-05	拘留 逮捕	其他存在明确被害人的纠纷												0	0	0				1
04120_钟育军容留他人吸毒罪一审刑事判决书		简易			0	（2016）闽0211刑初753号	1	钟育军	1981-11-26	完全刑事责任能力	1	35											厦门市集美区			2016-08-17	2016-11-02	拘留 逮捕	不存在明确被害人的纠纷												0	0	0
04122_王某某走私、贩卖、运输、制造毒品一审刑事判决书		简易			0	（2018）沪0110刑初637号	1	王某某	1961-10-23	完全刑事责任能力	1	57	0	1	汉族	0	0				上海市黄浦区			中国			2018-07-31		不存在明确被害人的纠纷						刘德平		1		上海金沪律师事务所		0	0	0				1		1
04124_唐汉珍走私、贩卖、运输、制造毒品一审刑事判决书		简易			0	（2016）鄂0104刑初957号	1	唐汉珍	1963-06-17	完全刑事责任能力	0	53	1	1	汉族	0	0	无业		无业	武汉市硚口区	湖北省武汉市		中国	初中	2016-08-24	2016-11-17	拘留 逮捕	不存在明确被害人的纠纷												0	0	0				1
04125_许耀东生产、销售伪劣产品一审刑事判决书					0	（2015）刑六金刑初字第00098号	1	许耀东	1982-01-18	完全刑事责任能力	1	33			汉族	0		其他		六安市东桥皋城燃气销售有限公司法定代表人	合肥市包河区	安徽省合肥市	合肥市包河区	中国	普通高级中学	2014-06-25	2015-03-20	拘留 逮捕							张洁				，安徽皋陶律师事务所		0	0	0
04130_穆某犯危险驾驶罪一审刑事判决书		普通			0	（2015）东刑初字第0106号	1	穆某										务农		务农							2015-05-06	取保候审							陈爱平				江苏陈爱平律师事务所		0	0	0				1
04132_南勤凯诈骗罪一审刑事判决书					0	（2017）宁0422刑初159号	1	南勤凯	1985-03-08	完全刑事责任能力	1	32			汉族	0		无业		无业		宁夏回族自治区西吉县	宁夏回族自治区西吉县		初中	2017-08-05	2017-11-30	拘留 逮捕	其他存在明确被害人的纠纷												0	0	0
04133_郑某甲、赵某甲等犯非法经营罪一审刑事判决书	1				0	（2015）寒刑初字第236号	5	郑某甲		完全刑事责任能力																2014-12-01	2015-08-06	逮捕	不存在明确被害人的纠纷						高存考		0		山东奥凯律师事务所		0	0	0
04135_余红强奸罪一审刑事判决书		简易			0	（2018）浙0304刑初144号	1	余红	1985-06-05	完全刑事责任能力	1	33			汉族			务工		务工	湖北省潜江市			中国	小学	2017-11-24	2018-02-05	逮捕 拘留	其他存在明确被害人的纠纷						陈批斌		0		浙江联冠律师事务所		0	0	0
04136_汪干交通肇事一审刑事判决书		普通			0	（2018）鄂1121刑初128号	1	汪干	1976-07-04	完全刑事责任能力	1	42			汉族			无业		无业	湖北省麻城市		麻城市	中国	初中	2018-07-04	2018-10-17	逮捕 拘留	其他存在明确被害人的纠纷						朱志刚		0		湖北鄂东律师事务所		0	0	0
04137_陈2非法吸收公众存款一审刑事判决书		普通			0	（2017）沪0106刑初211号	1	陈2	1978-04-08	完全刑事责任能力	0	39			汉族	0							长宁区				2017-03-14		不存在明确被害人的纠纷						陆祺	赵小慧			上海市金石律师事务所	上海市金石律师事务所	0	0	0
04139_许某某交通肇事一审刑事判决书					0	（2016）闽0124刑初87号	1	许某某	1981-04-16	完全刑事责任能力	1	35			汉族	0		无业		无业		福建省闽清县	福建省闽清县			2016-04-27	2016-07-19	拘留 取保候审 逮捕	其他存在明确被害人的纠纷						龚丽萍				福建元一律师事务所		0	0	0
04141_刑某某交通肇事罪一审刑事判决书					0	（2014）胶刑初字第1089号	1	邢某某			1				汉族								山东省胶州市			2014-07-24	2014-11-13	拘留 逮捕	其他存在明确被害人的纠纷												0	0	0					1
04143_伍薪桦走私、贩卖、运输、制造毒品罪一审刑事判决书		简易			0	（2017）粤0303刑初2400号	1	伍薪桦	1995-11-05	完全刑事责任能力	1	22			汉族						四川省广安市广安区			中国	初中	2017-11-07		逮捕 拘留	不存在明确被害人的纠纷						彭丽亚		0		北京市信利（深圳）律师事务所		0	0	0				1
04147_胡某甲、李某甲等赌博罪一审刑事判决书					0	（2014）鄂汉川刑初字第00203号	4	胡某甲										无业		无业						2014-04-01	2014-05-21	拘留 逮捕	不存在明确被害人的纠纷						夏千稳	孟章华	1		汉川市法律援助中心	湖南公言（深圳）律师事务所	0	0	0
04149_袁行善交通肇事一审刑事判决书		简易			0	（2018）皖0621刑初343号	1	袁行善	1994-06-18	完全刑事责任能力	1	24			汉族			务农		务农		安徽省濉溪县	濉溪县		初中	2018-07-17	2018-07-16	拘留 逮捕	其他存在明确被害人的纠纷						黄亮	朱健钊			安徽北方之光律师事务所	安徽北方之光律师事务所	0	0	0					1
04150_假冒注册商标一审刑事判决书		简易			0	（2014）闵刑（知）初字第64号	1	陈贤永	1976-01-10	完全刑事责任能力	1	38			汉族			其他		个体户	福建省永泰县			中国	小学	2014-03-22	2014-11-19	拘留 逮捕	不存在明确被害人的纠纷						林影	陈超			上海国巨律师事务所	上海国巨律师事务所	0	0	0				1	1
04151_沈某某非法持有枪支罪二审刑事判决书			1		0	（2014）合刑终字第00344号	1	沈某某	1971-11-10	完全刑事责任能力	1	43			汉族			无业		无业	安徽省长丰县			中国	普通高级中学	2014-06-20		拘留 逮捕	不存在明确被害人的纠纷						王华强				安徽华人律师事务所		0	0	0		1		1	1
04155_高鹏辉故意伤害一审刑事判决书		速裁			0	（2019）豫1621刑初269号	1	高鹏辉	1997-09-18	完全刑事责任能力	1	22			汉族			务农		务农		河南省扶沟县	扶沟县		初中	2019-05-31	2019-06-04	拘留 逮捕 取保候审	其他存在明确被害人的纠纷												0	0	0				1		1
04158_任延宇运输毒品一审刑事判决书		简易			0	（2018）渝0112刑初92号	1	任延宇	1984-09-27	完全刑事责任能力	1	34	0	0	汉族		0	无业		无业		黑龙江省克山县	辽宁省沈阳市和平区		初中	2017-12-06	2018-01-17	拘留 逮捕	不存在明确被害人的纠纷						程璐				四川泰仁（重庆）律师事务所律师		0	0	0				1
04161_杨胜礼强奸罪一审刑事判决书					0	（2017）浙1081刑初2256号	1	杨胜礼	1997-09-29	完全刑事责任能力	1	20			白族			务农		务农		贵州省六盘水市盘县	盘县		初中	2017-10-20	2017-12-15	拘留 逮捕	其他存在明确被害人的纠纷						朱文胜				浙江赢正律师事务所律师		0	0	0				1
04165_秦海涛寻衅滋事一审刑事判决书					0	（2019）豫1327刑初225号	1	秦海涛	1988-01-09	相对无刑事责任能力	1	31			汉族			无业		无业	河南省社旗县		河南省社旗县	中国	初中	2019-04-30		拘留 逮捕	其他存在明确被害人的纠纷						杨楠				河南宛东律师事务所律师		0	0	0
04166_张赛非法持有、私藏枪支、弹药一审刑事判决书					0	（2019）川0681刑初46号	1	张赛	1970-02-27	完全刑事责任能力	1	49	0	1	汉族	0	0	无业		无业	四川省广汉市		广汉市	中国	小学	2018-09-30	2019-01-25	拘留 逮捕	不存在明确被害人的纠纷						徐逸洲		1		四川锦川律师事务所		0	0	0
04167_陈某犯危险驾驶罪一审刑事判决书		速裁			0	（2016）浙0110刑初529号	1	陈某																				取保候审	其他存在明确被害人的纠纷												0	0	0
04168_洪小增交通肇事一审刑事判决书					0	（2016）豫0122刑初519号	1	洪小增	1970-12-19	完全刑事责任能力	1	46			汉族	0		务农		务农		河南省中牟县	中牟县		小学以下	2016-08-29	2016-11-25	拘留 逮捕	其他存在明确被害人的纠纷												0	0	0				0
04169_吴某开设赌场罪一审刑事判决书		简易转普通			0	（2015）温乐刑初字第244号	1	吴某					1	1			0									2014-09-11	2015-02-06	逮捕	不存在明确被害人的纠纷			1	0		王洁琼				北京国纲华辰（温州）律师事务所		0	0	0
04170_张某犯重大劳动安全事故罪一审刑事判决书					0	（2015）阜刑初字第00120号	1	张某										其他		其他						2015-04-30	2015-04-17	拘留 取保候审 逮捕	其他存在明确被害人的纠纷						徐文海				江苏阜一律师事务所		0	0	0
04172_林文隆强奸罪一审刑事判决书					0	（2019）浙0381刑初615号	1	林文隆	2001-01-04		1	18			汉族	0		无业		无业		浙江省瑞安市	瑞安市		初中	2019-03-26	2019-04-23	拘留 逮捕	其他存在明确被害人的纠纷						陈正飞		1		浙江安瑞律师事务所		0	0	0
04174_朱秀文侵犯著作权罪一审刑事判决书					0	（2012）杭余刑初字第1549号	1	朱秀文																			2012-10-11	拘留 取保候审													0	0	0				1
04175_燕国岸强奸罪一审刑事判决书		普通			0	（2016）粤0306刑初3406号	1	燕某																		2015-12-30		拘留 逮捕	其他存在明确被害人的纠纷												0	0	0
04177_叶均凤犯交通肇事罪一审刑事判决书					0	（2017）鄂0683刑初137号	1	叶均凤	1987-10-05	完全刑事责任能力	0	30				0						湖北省枣阳市	枣阳市						其他存在明确被害人的纠纷												0	0	0				1
04179_被告人刘某某犯交通肇事罪一案刑事判决书					0	（2016）陕0723刑初46号	1	刘某某			1		0	1	汉族		0	务农		务农					初中		2016-04-12	拘留 取保候审	其他存在明确被害人的纠纷												0	0	0				1	1
04180_李某某容留他人吸毒一审刑事判决书					0	（2017）闵0181刑初111号	1	李某某	1986-01-24	完全刑事责任能力	1	31			汉族	0		其他		其他		福建省福清市	福建省福清市		普通高级中学	2017-04-19	2017-08-03	拘留 逮捕													0	0	0
04181_王某甲强奸、猥亵儿童一审刑事判决书					0	（2015）丰少刑一初字第2号	1	王某甲								1			0								2015-05-13		其他存在明确被害人的纠纷												0	0	0
04182_刘某危险驾驶罪二审刑事判决书			1		0	（2015）并刑终字第101号	1	刘某							汉族						重庆市云阳县		太原市万柏林区	中国	小学			拘留 取保候审	不存在明确被害人的纠纷												0	0	0				1
04183_刘汉月敲诈勒索罪一审刑事判决书					0	（2019）闵0722刑初24号	1	刘汉月	1973-10-24	完全刑事责任能力	0	46			汉族	0		务农		务农		福建省蒲城县	蒲城县		小学		2019-01-25	取保候审	其他存在明确被害人的纠纷						王奕洪		1		福建绍唐律师事务所		0	0	0				1
04184_许善林交通肇事一审刑事判决书					0	（2016）鄂1303刑初362号	1	许善林	1993-06-20	完全刑事责任能力	1	23			汉族	0							随县		初中	2016-03-31		拘留 逮捕 取保候审							徐永斌				湖北五合律师事务所		0	0	0
04186_吕某某盗窃一审刑事判决书					0	（2014）金刑初字第421号	1	吕某某			1																2014-08-13		其他存在明确被害人的纠纷						柳春波				辽宁新世纪律师事务所		0	0	0
04193_徐勇强容留他人吸毒一审刑事判决书		简易			0	（2018）粤1226刑初128号	1	徐勇强	1973-07-08	完全刑事责任能力	1	45	1	1	汉族	0	0				广东省德庆县			中国	初中	2018-09-12		拘留 逮捕	不存在明确被害人的纠纷						宁支雄		1		广东联翔律师事务所		0	0	0
04195_杨某某侵犯著作权、复制、贩卖淫秽物品牟利一审刑事判决书		简易			0	（2015）中一法知刑初字第50号	1	杨某某	1980-03-03	完全刑事责任能力	1	35			汉族	0		务农		务农	湖北省监利县	监利县		中国	初中		2015-05-25	拘留 取保候审	不存在明确被害人的纠纷												0	0	0
04197_殷某危险驾驶罪再审刑事判决书	1				0	（2016）浙0802刑再1号	1	殷某																		2016-07-29		取保候审 逮捕													0	0	0	0	1	0
04203_欧阳露吉走私、贩卖、运输、制造毒品罪一审刑事判决书		速裁			0	（2018）闽0203刑初852号	1	欧阳露吉	1989-01-18	完全刑事责任能力	1	29			汉族			务工		金丰元商务咨询有限公司员工	福建省厦门市思明区			中国	高等专科学校	2018-06-22	2018-10-08	拘留 逮捕	不存在明确被害人的纠纷						欧阳立威	陈伟			福建闽鹭律师事务所	福建闽鹭律师事务所	0	0	0				1		1
04207_王某某危险驾驶一审刑事判决书					0	（2018）豫1426刑初548号	1	王某某	1989-10-16	完全刑事责任能力	1	29			汉族	0		务农		务农	河南省商丘市虞城县		虞城县	中国	小学		2018-09-25	拘留 取保候审	不存在明确被害人的纠纷						闫克礼	李月玲			河南栗城律师事务所	河南栗城律师事务所	0	0	0				1	1
04209_孙志勇、杨洪盗窃一审刑事判决书					0	（2019）鲁0523刑初180号	2	孙志勇	1986-02-10	完全刑事责任能力	1	33			汉族	0					山东省广饶县	山东省广饶县	广饶县	中国	高等专科学校	2019-02-25	2019-05-08	拘留 逮捕	不存在明确被害人的纠纷						姜国义				山东准律律师事务所		0	0	0
04213_唐珊贷款诈骗罪一审刑事判决书					0	（2018）浙0421刑初34号	1	唐珊	1986-08-04	完全刑事责任能力	1	32	0	1	汉族	0	0	务农		务农			河南省罗山县		初中		2017-12-28	取保候审	其他存在明确被害人的纠纷												0	0	0
04214_易某某贩卖毒品一审刑事判决书		简易			0	（2017）鄂0112刑初240号	1	易某某			1															2017-03-03	2017-04-25	拘留 逮捕	不存在明确被害人的纠纷												0	0	0
04215_王某某危险驾驶一审刑事判决书					0	（2018）鲁1083刑初59号	1	王某某	1983-06-04	完全刑事责任能力	1	35				0											2018-02-07	取保候审	不存在明确被害人的纠纷												0	0	0
04216_刘洋故意伤害一审刑事判决书		简易			0	（2018）津0110刑初914号	1	刘洋	1976-02-06	完全刑事责任能力	1	42	0	0	汉族	0	0				天津市东丽区	天津市	天津市东丽区	中国	初中	2018-08-31	2018-11-21	拘留 逮捕 取保候审	其他存在明确被害人的纠纷						许作宾				天津唯岩律师事务所		0	0	0
04217_姜柑录一审刑事判决书		速裁			0	（2018）湘0104刑初112号	1	姜柑录	1973-12-22	完全刑事责任能力	1	45			汉族	0		务工		公司员工	四川省巴中市巴州区		长沙市岳麓区	中国	普通高级中学		2018-02-06	拘留 取保候审	不存在明确被害人的纠纷												0	0	0				1	1	1
04218_周英才危险驾驶一审刑事判决书		速裁转普通			0	（2018）湘0104刑初977号	1	周英才	1974-08-27	完全刑事责任能力	1	44			汉族	0		其他		个体户	长沙市岳麓区	湖南省长沙市	长沙市岳麓区	中国	中专（包括职业高中，中等专业学校，技工学校）		2018-11-12	取保候审	不存在明确被害人的纠纷						谢志钊				湖南通达恒信律师事务所		0	0	0				1	1	1
04219_沈某某危险驾驶罪一审刑事判决书		简易转普通			0	（2015）红刑初字第132号	1	沈××	1970-12-11	完全刑事责任能力	1	45			满族	0		务工		务工		黑龙江省宝清县			中专（包括职业高中，中等专业学校，技工学校）		2015-06-11	取保候审													0	0	0					1
04222_（2014）北刑初字第205号		简易			0	（2014）北刑初字第205号	1	郑某某	1979-08-06	完全刑事责任能力	1	35			汉族						河北省保定市北市区			中国	初中		2014-08-28	取保候审	不存在明确被害人的纠纷												0	0	0				1
04224_（2017）沪0114刑初1467号		简易			0	（2017）沪0114刑初1467号	1	XXX	1984-05-07	完全刑事责任能力	0	37			布依族						贵州省		上海市嘉定区	中国			2017-09-05														0	0	0
04229_（2017）豫1329刑初691号		简易			0	（2017）豫1329刑初691号	1	王良杰	1972-10-16	完全刑事责任能力	1	45	0	0	汉族		0	其他		个体工商户		河南省新野县	新野县		初中		2017-12-01	取保候审	不存在明确被害人的纠纷						杨小义				河南同心德律师事务所		0	0	0				1
04230_（2017）湘0103刑初771号					0	（2017）湘0103刑初771号	1	罗旭辉	1973-12-12	完全刑事责任能力	1	43	0	0	汉族		0					湖南省长沙市	长沙市雨花区		中专（包括职业高中，中等专业学校，技工学校）		2017-12-25	取保候审	不存在明确被害人的纠纷						唐壮辉	夏明			湖南人和律师事务所	湖南人和律师事务所	0	0	0
04231_（2018）云3325刑初89号		简易			0	（2018）云3325刑初89号	1	罗某		完全刑事责任能力	1																2018-11-01	取保候审	不存在明确被害人的纠纷												0	0	0				1	1
04232_（2019）湘0103刑初129号		简易			0	（2019）湘0103刑初129号	1	阳雪林	1975-12-22	完全刑事责任能力	1	44	1	1	汉族			无业		无业					初中	2018-12-11	2019-02-14	拘留 逮捕	其他存在明确被害人的纠纷												0	0	0				1		1
04235_（2018）京0105刑初909号		简易			0	（2018）京0105刑初909号	1	李成刚	1976-07-22	完全刑事责任能力	1	42			汉族			务农		务农	湖北省石首市	湖北省石首市		中国	初中	2028-02-14	2018-04-25	拘留 逮捕	其他存在明确被害人的纠纷												0	0	0				1		1
04236_（2016）湘0821刑初115号		普通			0	（2016）湘0821刑初115号	1	陈某										务农		务农						2016-08-14	2016-06-08	取保候审 逮捕	其他存在明确被害人的纠纷												0	0	0
04237_（2017）鲁1083刑初375号					0	（2017）鲁1083刑初375号	1	安某某	1963-01-08	完全刑事责任能力	1	54			汉族			无业		无业	山东省乳山市	山东省乳山市	山东省乳山市	中国	大学本科	2018-03-07	2017-12-08	取保候审 逮捕	不存在明确被害人的纠纷												0	0	0				1
04238_（2019）湘0105刑初899号		速裁			0	（2019）湘0105刑初899号	1	吴巨林	1980-11-06	完全刑事责任能力	1	39			汉族			无业		无业	湖南省沅陵县		长沙市岳麓区	中国	高等专科学校			取保候审	不存在明确被害人的纠纷												0	0	0
04239_（2017）粤0307刑初4825号		简易			0	（2017）粤0307刑初4825号	1	鲁某					0	0			0									2017-10-19	2017-12-01	逮捕 拘留	其他存在明确被害人的纠纷						郑某平	夏某			广东某律师事务所	广东某律师事务所	0	0	0				1		1
04241_（2016）新2827刑初158号		普通			0	（2016）新2827刑初158号	1	巴孜			1			0	蒙古族			务农		务农	新疆焉耆县		新疆和静县	中国	初中		2016-11-01	取保候审	不存在明确被害人的纠纷												0	0	0				1
04242_（2018）京0113刑初724号		简易			0	（2018）京0113刑初724号	1	董福义	1971-04-20	完全刑事责任能力	1	47			汉族			务农		务农	河南省项城市	河南省项城市		中国	小学	2018-05-04	2018-08-02	拘留 逮捕	其他存在明确被害人的纠纷						段雷				北京市昌明律师事务所		0	0	0
04246_（2019）湘0105刑初895号		速裁			0	（2019）湘0105刑初895号	1	刘志乔	1977-09-11	完全刑事责任能力	1	42			汉族			其他		公司经理	湖南省安化县	湖南省安化县	广东省广州市南沙区	中国	大学本科			取保候审													0	0	0
04247_（2015）常刑二初字第8号.					0	（2015）常刑二初字第8号	1	金某			1							其他		有限公司经理				韩国			2015-09-28	取保候审	不存在明确被害人的纠纷												0	0	0					1
04250_（2016）沪0113刑初273号		简易			0	（2016）沪0113刑初273号	1	张某	1995-04-12	完全刑事责任能力	1	21			汉族						福建省			中国			2016-01-22		其他存在明确被害人的纠纷												0	0	0
04252_（2017）鲁1083刑初366号		简易转普通			0	（2017）鲁1083刑初366号	1	王聪	1991-08-11	完全刑事责任能力	1	26			汉族			务工		务工	湖北省孝感市孝昌县	湖北省孝感市	山东省乳山市	中国	初中		2017-11-24	取保候审	不存在明确被害人的纠纷												0	0	0
04255_（2019）闽0624刑初187号					0	（2019）闽0624刑初187号	1	张金耀	1978-07-07	完全刑事责任能力	1	41			汉族			其他		个体劳动者		福建省诏安县	诏安县		初中		2019-05-17	拘留 取保候审 监视居住	不存在明确被害人的纠纷												0	0	0					1
04256_（2017）沪0115刑初4342号					0	（2017）沪0115刑初4342号	1	丁某	1992-07-28	完全刑事责任能力	1	25			汉族						山西省襄汾县			中国			2017-11-22		其他存在明确被害人的纠纷						韩峰				上海上一律师事务所		0	0	0
04257_（2019）湘0102刑初1002号		速裁			0	（2019）湘0102刑初1002号	1	李文涛	1983-10-19	完全刑事责任能力	1	36			汉族			无业		无业	湖南省汨罗市	湖南省汨罗市	长沙市芙蓉区	中国	普通高级中学		2019-12-20	取保候审	不存在明确被害人的纠纷												0	0	0
04258_（2018）云0723刑初149号		简易			0	（2018）云0723刑初149号	1	肖正祥	1982-10-27	完全刑事责任能力	1	36		0	彝族			其他		交通警察大队副大队长	云南省华坪县		华坪县	中国	大学本科		2018-10-18	取保候审													0	0	0
04263_（2017）鲁0683刑初483号					0	（2017）鲁0683刑初483号	1	杨学国	1973-07-01	完全刑事责任能力	1	43			汉族			务农		务农					初中	2017-06-28	2017-09-21	拘留 逮捕	家庭纠纷												0	0	0
04264_（2018）湘0105刑初870号		速裁			0	（2018）湘0105刑初870号	1	刘军	1977-07-27	完全刑事责任能力	1	41			汉族						湖南省桂阳县	湖南省桂阳县	长沙市开福区	中国	中专（包括职业高中，中等专业学校，技工学校）	2018-11-08		取保候审 逮捕	其他存在明确被害人的纠纷												0	0	0				1		1
04266_（2018）湘01刑终778号				1	0	（2018）湘01刑终778号	1	曾胜武	1988-12-23	完全刑事责任能力	1	30			汉族			其他		个体工商户		湖南省长沙市	湖南省长沙市天心区		高等专科学校			拘留 取保候审	不存在明确被害人的纠纷												0	0	0		1
04271_（2018）冀0921刑初316号					0	（2018）冀0921刑初316号	3	谢恩启	1990-12-29	完全刑事责任能力	1	28			汉族			务农		务农			沧县		小学		2018-11-14	拘留 取保候审	其他存在明确被害人的纠纷						李博辉				河北铭鉴（盐山）律师事务所		0	0	0				1
04272_ （2018）鲁1083刑初92号					0	（2018）鲁1083刑初92号	1	李某某	1982-08-21	完全刑事责任能力	1	36			汉族			无业		无业	山东省乳山市	山东省乳山市	山东省乳山市	中国	普通高级中学		2018-03-19	拘留 取保候审	不存在明确被害人的纠纷												0	0	0
04276_（2017）湘0102刑初1032号					0	（2017）湘0102刑初1032号	1	藏少年	1991-12-01	完全刑事责任能力	1	26			汉族			无业		无业	益阳市南县	湖南省南县	益阳市南县	中国	中专（包括职业高中，中等专业学校，技工学校）		2017-12-25	取保候审	不存在明确被害人的纠纷												0	0	0				1		1
04278_伍某甲重大劳动安全事故罪一审刑事判决书		简易			0	（2013）温瑞刑初字第1967号	1	伍某甲		完全刑事责任能力								其他		其他						2013-11-01	2013-10-26	逮捕 取保候审 拘留							潘光沙		0		浙江瓯江律师事务所		0	0	0
04279_被告人王国争犯诈骗罪一审刑事判决书					0	（2017）晋0830刑初118号	1	王国争	1981-06-23	完全刑事责任能力	1	36			汉族			务农		务农	山西省临猗县		临猗县	中国	初中			取保候审 拘留													0	0	0				1	1
04280_王某某犯危险驾驶罪一审刑事判决书					0	（2016）辽0411刑初194号	1	王某某	1962-11-12	完全刑事责任能力	1	54			汉族			无业		无业			抚顺市顺城区		初中		2016-08-30	取保候审													0	0	0
04281_被告许博文强奸罪一审刑事判决书		简易			0	（2018）陕0702刑初111号	1	许博文			1				汉族						河南省商丘市睢县			中国	大学本科	2018-01-19		逮捕 拘留	其他存在明确被害人的纠纷						景兰江	梁聿科	0	0	陕西嘉盟律师事务所	陕西兴振业律师事务所	0	0	0
04282_曾胜武危险驾驶一审刑事判决书		简易			0	（2018）湘0103刑初478号	1	曾胜武	1988-12-23	完全刑事责任能力	1	30			汉族			其他		其他	长沙市望城区	湖南省长沙市	长沙市天心区	中国	高等专科学校		2018-06-14	取保候审 拘留													0	0	0				1	1
04285_梁春雷强奸罪一审刑事判决书					0	（2017）吉2403刑初369号	1	梁春雷														吉林省敦化市	敦化市		小学	2017-08-02	2017-10-27	逮捕 拘留							周长征	魏志友	0	0	吉林冠宁律师事务所	吉林冠宁律师事务所	0	0	0				1
04286_邢某某危险驾驶一审刑事判决书					0	（2018）鲁1083刑初36号	1	邢某某	1974-04-07	完全刑事责任能力	1	44			汉族			务工		务工	山东省乳山市	山东省乳山市	山东省乳山市	中国			2018-01-30	取保候审	不存在明确被害人的纠纷												0	0	0
04290_罗勇走私、贩卖、运输、制造毒品罪一审刑事判决书		简易			0	（2016）渝0107刑初1537号	1	罗勇	1988-01-01	完全刑事责任能力	1	28	0	1	汉族			无业		无业		重庆市江津区			小学	2016-09-19	2016-11-22	逮捕 拘留	不存在明确被害人的纠纷												0	0	0
04291_林浩危险驾驶一审刑事判决书					0	（2018）鲁1083刑初80号	1	林浩	1967-10-25	完全刑事责任能力	1	51			汉族			务工		务工	山东省乳山市	山东省乳山市	山东省乳山市	中国			2018-03-13	取保候审	不存在明确被害人的纠纷												0	0	0
04292_被告人丁春梅运输毒品、吴培生非法持有毒品一案一审刑事判决书					0	（2018）陕0102刑初72号	2	丁春梅	1976-03-30	完全刑事责任能力	0	42			傣族			务农		务农		云南省西双版纳傣族自治州	西双版纳傣族自治州勐海县		普通高级中学	2017-08-18	2018-01-11	逮捕 拘留	不存在明确被害人的纠纷						秦维彬	孙世民	1	1	陕西云迈律师事务所	陕西云迈律师事务所	0	0	0
04295_徐华强奸罪一审刑事判决书		简易			0	（2016）浙0327刑初937号	1	徐华	1988-05-27	完全刑事责任能力	1	28			汉族			务农		务农		浙江省嘉善县	嘉善县		中专（包括职业高中，中等专业学校，技工学校）	2016-02-25	2016-07-14	逮捕 拘留	其他存在明确被害人的纠纷						陈焕付		0		浙江瓯鼎律师事务所		0	0	0
04296_胡全福危险驾驶一审刑事判决书		简易			0	（2019）沪0112刑初2026号	1	胡全福	1986-04-12	完全刑事责任能力	1	33			汉族						安徽省			中国			2019-09-26		不存在明确被害人的纠纷												0	0	0
04298_张某某犯危险驾驶罪一审刑事判决书		简易			0	（2015）新刑初字第00233号	1	张某某	1987-05-23	完全刑事责任能力	1	28			汉族			无业		无业	北京市	内蒙古自治区东胜区	呼和浩特市新城区	中国	大学本科		2015-05-05		不存在明确被害人的纠纷												0	0	0				1
04302_被告人韩某某贩卖毒品一案一审刑事判决书		简易			0	（2018）辽0106刑初88号	1	韩某某		完全刑事责任能力	1		1	1	汉族		1	无业		无业		辽宁省沈阳市	辽宁省沈阳市铁西区		初中	2017-12-13	2018-01-24	逮捕 拘留	不存在明确被害人的纠纷												0	0	0
04303_李君危险驾驶一审刑事判决书		普通			0	（2018）鲁1092刑初47号	1	李君	1991-11-16	完全刑事责任能力	1	27			朝鲜族			无业		无业	黑龙江省牡丹江市西安区	黑龙江省牡丹江市	威海市环翠区	中国	普通高级中学		2018-02-11	取保候审													0	0	0
04304_田振岭危险驾驶一审刑事判决书		简易			0	（2019）皖1221刑初89号	1	田振岭	1988-09-04	完全刑事责任能力	1	31			汉族			无业		无业	安徽省临泉县		安徽省临泉县	中国	初中			取保候审	不存在明确被害人的纠纷												0	0	0
04307_杨×票据诈骗罪一审刑事判决书		简易			0	（2015）丰刑初字第194号	1	杨X	1989-01-19	完全刑事责任能力	1	26															2015-12-26	取保候审	其他存在明确被害人的纠纷												0	0	0				1
04308_李飞腾非法吸收公众存款罪一审刑事判决书		简易			0	（2013）绍刑初字第241号	1	李飞腾																		2012-08-14	2013-03-05	逮捕 拘留	不存在明确被害人的纠纷						王越明	陈建国					0	0	0				1
04310_肖飞飞强奸罪一审刑事判决书		普通			0	（2017）浙0782刑初2629号	1	肖飞飞	1990-05-19	完全刑事责任能力	1	27			汉族							甘肃省正宁县	甘肃省正宁县		初中	2017-08-12	2017-01-23	逮捕 拘留	其他存在明确被害人的纠纷						王江波		0		浙江红太阳律师事务所		0	0	0
04311_刘某某贩卖毒品一审刑事判决书		简易			0	（2018）沪0101刑初813号	1	刘某某	1993-10-27	完全刑事责任能力	0	25			汉族						黑龙江省虎林市		上海市	中国			2018-11-01		不存在明确被害人的纠纷												0	0	0				1
04312_张广源强奸一审刑事判决书		普通			0	（2018）粤1973刑初2305号	1	张广源	1999-04-04	完全刑事责任能力	1	19			汉族			务工		务工	广东省茂名市信宜市			中国	初中	2018-08-08	2018-10-16	逮捕 拘留							周志荣	张伟	0	0	广东海法（东莞）律师事务所	广东海法（东莞）律师事务所	0	0	0
04320_武某某贩卖毒品罪一审刑事判决书		简易			0	（2015）天刑初字第227号	1	武某某	1992-11-11	完全刑事责任能力		23															2015-03-04		不存在明确被害人的纠纷												0	0	0				1
04322_李奕涛寻衅滋事一审刑事判决书		简易			0	（2018）粤0785刑初311号	1	李奕涛	1998-01-15	完全刑事责任能力	1	20			汉族			务工		务工	广东省恩平市		广东省恩平市	中国		2018-09-26	2018-11-22	逮捕 拘留	不存在明确被害人的纠纷												0	0	0
04323_周宇良走私、贩卖、运输、制造毒品一审刑事判决书		简易			0	（2018）粤0113刑初1247号	1	周宇良	1989-08-07	完全刑事责任能力	1	29			汉族								广东省广州市番禺区		初中	2018-03-30	2018-06-20	逮捕 拘留													0	0	0				1
04324_杨正伟强奸罪二审刑事判决书			1		0	（2017）渝05刑终13号	1	杨正伟	1994-01-01	完全刑事责任能力	1	23			汉族			务工		务工		重庆市			高等专科学校	2016-07-28			其他存在明确被害人的纠纷						陈行	雷启如	0	0	重庆中雷律师事务所	重庆中雷律师事务所	0	0	0		1	1
04325_滕某、张某赌博一审刑事判决书					0	（2016）冀1122刑初62号	4	滕某		完全刑事责任能力	1																2016-06-25	取保候审													0	0	0
04331_邓安强盗窃罪一审刑事判决书		简易			0	（2017）渝0103刑初285号	1	邓安强	1994-01-05	完全刑事责任能力	1	23			汉族			无业		无业		重庆市永川区	重庆市永川区		小学	2017-01-12	2017-03-17	逮捕 拘留 监视居住	其他存在明确被害人的纠纷												0	0	0
04335_孙亮危险驾驶一审刑事判决书		简易			0	（2015）扎刑初字第150号	1	孙亮	1988-06-01	完全刑事责任能力	1	27			汉族			务工		务工			扎赉特旗		中专（包括职业高中，中等专业学校，技工学校）		2015-03-19	取保候审 拘留													0	0	0				1
04344_冯闯强奸一审刑事判决书		普通			0	（2017）浙0381刑初1819号	1	冯闯	1989-03-14	完全刑事责任能力	1	29			汉族			无业		无业	湖北省仙桃市	湖北省仙桃市		中国	小学	2017-07-28	2017-10-21	逮捕 拘留	其他存在明确被害人的纠纷						潘南南		1		浙江玉海律师事务所		0	0	1
04347_马某某强奸一审刑事判决书		简易			0	（2018）沪0115刑初385号	1	马某某	1984-05-29	完全刑事责任能力	1	34			汉族						江苏省南京市			中国			2018-01-22		其他存在明确被害人的纠纷						陈军				上海汉盛		0	0	0
04352_李某诈骗罪一审刑事判决书					0	（2014）穗天法刑初字第1624号	1	李某甲													湖南省衡阳县	湖南省衡阳县		中国		2014-02-21	2014-08-15	拘留 逮捕	其他存在明确被害人的纠纷						张启龙						0	0	0				1
04354_李某甲一审刑事判决书		简易			0	（2018）沪0120刑初1059号	1	李某甲																			2018-08-31		不存在明确被害人的纠纷												0	0	0				1
04355_余顺平强奸一审刑事判决书		简易			0	（2016）浙0212刑初1388号	1	余顺平	1962-11-06	完全刑事责任能力	1	54			土家族			无业		无业		贵州省德江县	贵州省德江县			2016-07-15	2016-09-09	拘留 逮捕	其他存在明确被害人的纠纷						方磊		1		浙江甬港律师事务所		0	0	0
04356_时云龙犯侵犯公民个人信息罪、提供侵入、非法控制计算机信息系统程序、工具罪一审刑事判决书					0	（2018）晋0321刑初25号	1	时云龙	1993-08-04	完全刑事责任能力	1	25											山西省平定县			2017-09-15	2018-02-09	拘留 逮捕	不存在明确被害人的纠纷												0	0	0
04359_朱某某放火案一审刑事判决书		简易			0	（2016）云0902刑初1号	1	朱某某			1											云南省临沧市	云南省临沧市			2015-10-19	2016-01-04	拘留 逮捕	其他存在明确被害人的纠纷						廖永华	杨国俊			云南临疆律师事务所	云南临疆律师事务所	0	0	0				1
04361_朱某甲犯寻衅滋事罪、敲诈勒索罪一审刑事判决书		简易			0	（2016）浙0382刑初395号	1	朱某甲										务工		务工						2015-11-02	2016-03-03		其他存在明确被害人的纠纷												0	0	0
04364_陈晓飞敲诈勒索罪一审刑事判决书					0	（2019）闽0103刑初328号	1	陈晓飞	1977-07-23	完全刑事责任能力	1	42			汉族			无业		无业	福建省福州市	福建省福州市长乐区		中国	小学	2019-03-21	2019-06-17	拘留 逮捕	其他存在明确被害人的纠纷						吴金兰				福建诚真律师事务所		0	0	0				1	1
04365_鲁澄一审刑事判决书		速裁			0	（2019）鄂0107刑初166号	1	鲁澄	1989-06-05	完全刑事责任能力	1	30	1	1	汉族			无业		无业		湖北省武汉市	湖北省武汉市青山区		初中	2019-03-14		拘留 逮捕	不存在明确被害人的纠纷												0	0	0				1
04369_唐某犯寻衅滋事罪一审刑事判决书		简易			0	（2015）鄂黄州刑初字第00182号	1	唐某										无业		无业						2015-07-21	2015-11-25	逮捕	其他存在明确被害人的纠纷						梅怀东				湖北齐安律师事务所		0	0	0				1
04374_刘安华,吴胜敬,邵运春等非法收购、运输、出售珍贵、濒危野生动物、珍贵、濒危野生动物制品罪一审刑事判决书					0	（2019）陕7101刑初67号	4	刘安华			1				汉族												2019-10-23		不存在明确被害人的纠纷						杨加平				陕西宁康律师事务所		0	0	0				1	1	1
04375_刘球城强奸罪一审刑事判决书					0	（2017）浙0782刑初2808号	1	刘球城	1977-01-02	完全刑事责任能力	1	40		1	汉族							广东省丰顺县	广东省丰顺县		文盲	2017-09-09	2017-12-08	拘留 逮捕							季乾英		1		浙江凌凯律师事务所		0	0	0				1
04380_袁春海故意伤害罪一审刑事判决书					0	（2016）黑0524刑初10号	1	袁春海	1976-12-27	完全刑事责任能力	1	40		1	汉族			无业		无业	黑龙江省饶河县		饶河镇东顺四街21号	中国	初中	2015-11-03	2016-02-02	拘留 逮捕													0	0	0
04385_王泽聪盗窃二审刑事判决书			1		0	（2016）冀01刑终929号	1	王泽聪	1995-05-26	完全刑事责任能力	1	21			汉族			务工		务工	河北省新乐市		石家庄市长安区	中国	普通高级中学	2016-05-31		拘留 逮捕	其他存在明确被害人的纠纷						李阳				河北冀人律师事务所		0	0	0
04391_110郝某某非法经营罪一审刑事判决书					0	（2019）苏1324刑初110号	1	郝某某	1984-11-20	完全刑事责任能力	1	35			汉族			其他		个体户		山东省临沂市	山东省临沂市兰山区			2018-12-21	2019-02-19	拘留 逮捕	不存在明确被害人的纠纷												0	0	0
04392_李建迪强奸一审刑事判决书					0	（2018）湘0104刑初373号	1	李建迪	1989-11-17	完全刑事责任能力	1	29			汉族			其他		快递公司职员					初中	2018-01-27	2018-04-17	拘留 逮捕	其他存在明确被害人的纠纷						郑天鹏				湖南安必信律师事务所		0	0	0				1		1
04394_于春国涉嫌强制猥亵罪一审刑事判决书		简易			0	（2018）吉0723刑初202号	1	于春国	1975-11-21	完全刑事责任能力	1	43			汉族			务农		务农	吉林省乾安县		乾安县	中国	初中	2018-10-16	2018-12-13	拘留 逮捕	其他存在明确被害人的纠纷												0	0	0
04395_唐一荣滥伐林木罪一审刑事判决书		简易			0	（2019）浙1121刑初128号	1	唐一荣	1967-08-22	完全刑事责任能力	1	52			汉族							浙江省青田县	浙江省青田县		小学	2019-06-12	2019-06-12	拘留 取保候审 逮捕	不存在明确被害人的纠纷						胡安阳				浙江五洲律师事务所		0	0	0
04400_钟某某诈骗一审刑事判决书		简易			0	（2016）吉0122刑初25号	1	钟某甲			1				汉族			务农		务农	吉林省农安县		农安县	中国	小学		2016-01-04	取保候审	其他存在明确被害人的纠纷												0	0	0
04401_董加蒲非法侵入住宅一审刑事判决书		普通			0	（2016）闽0982刑初453号	1	董加蒲	1982-03-16	完全刑事责任能力	1	34		1	汉族			无业		无业		福建省福鼎市	福鼎市		初中	2016-08-30	2016-12-29								吴璇				福建鼎平律师事务所		0	0	0
04402_蔡某某生产、销售假药一审刑事判决书		简易			0	（2017）闽0203刑初492号	1	蔡某某	1981-03-07	完全刑事责任能力	1	36		1	汉族			无业		无业			湖南省岳阳市容县		普通高级中学	2017-05-11	2017-04-24	取保候审 逮捕	不存在明确被害人的纠纷						陈有限	谢冬冬			福建联合信实律师事务所	福建联合信实律师事务所	0	0	0
04405_刘×1走私、贩卖、运输、制造毒品罪一审刑事判决书		简易			0	（2016）京0105刑初2539号	1	刘×1	1991-07-11	完全刑事责任能力	1	25	1	1												2016-09-30	2016-12-21	拘留 逮捕	不存在明确被害人的纠纷												0	0	0
04408_钟兴昌危险驾驶罪一审刑事判决书		简易			0	（2019）闽0322刑初826号	1	钟兴昌	1981-12-20	完全刑事责任能力	1	38			汉族			务农		务农		贵州省织金县	仙游县		初中		2019-10-29	拘留 取保候审	不存在明确被害人的纠纷												0	0	0				1	1
04414_秦某盗窃罪，马某甲、马某乙掩饰、隐瞒犯罪所得、犯罪所得收益罪一审刑事判决书		简易			0	（2014）邹刑初字第557号	3	秦某										务农		务农						2014-04-10	2014-12-04	拘留 逮捕	其他存在明确被害人的纠纷						张光明				山东公明政和律师事务所		0	0	0				1	1
04419_欧某和犯贩卖毒品罪刑事判决书		简易			0	（2017）粤0303刑初1728号	1	欧某和																					不存在明确被害人的纠纷												0	0	0
04421_梁廷国犯挪用资金罪二审刑事判决书			1		0	（2015）潍刑二终字第188号	1	梁廷国																		2013-11-18		拘留 逮捕	不存在明确被害人的纠纷						刘福利				山东泰琪律师事务所		0	0	0
04423_张现军、芦爱丽玩忽职守一案一审刑事判决书		简易			0	（2011）新刑初字第56号	2	张现军	1972-06-10	完全刑事责任能力	1	39															2010-12-08	取保候审 取保候审	不存在明确被害人的纠纷												0	0	0				1
04425_萧礼英走私、贩卖、运输、制造毒品罪一审刑事判决书		简易			0	（2018）粤0111刑初406号	1	萧礼英	1969-06-05	完全刑事责任能力	1	49			汉族						广州市白云区	广东省广州市		中国	小学	2017-11-10	2018-02-01	拘留 逮捕	不存在明确被害人的纠纷												0	0	0				1
04427_张勇盗窃、走私、贩卖、运输、制造毒品一审刑事判决书		简易			0	（2018）鄂0104刑初143号	1	张勇	1970-12-16	完全刑事责任能力	1	48		1	汉族			无业		无业	武汉市硚口区	湖北省武汉市	武汉市硚口区	中国	初中	2017-12-22	2018-01-17	取保候审 拘留 逮捕	其他存在明确被害人的纠纷												0	0	0				1
04431_董龙非法持有毒品一审刑事判决书		简易			0	（2019）沪0112刑初726号	1	董龙	1981-05-04	完全刑事责任能力	1	38			满族						辽宁省大连市			中国			2019-05-08		不存在明确被害人的纠纷						刘燊				上海市新闵律师事务所		0	0	0				1		1
04433_黄文成诈骗一审刑事判决书		简易			0	（2019）京0112刑初1118号	1	黄文成	1991-04-27	完全刑事责任能力	1	28			汉族			无业		无业	北京市通州区	北京市		中国	高等专科学校	2019-06-21	2019-10-17	逮捕 逮捕	其他存在明确被害人的纠纷						卢志杰				北京济桓律师事务所		0	0	0				1		1
04434_张某甲、张某乙盗窃一审刑事判决书					0	（2015）长净开刑初字第64号	2	张某甲					0	1				其他		保安		吉林省长春市				2015-04-22	2015-06-19	拘留 逮捕	其他存在明确被害人的纠纷 其他存在明确被害人的纠纷												0	0	0				1
04436_蔡某走私、贩卖、运输、制造毒品一审刑事判决书		简易			0	（2018）沪0104刑初1094号	1	蔡某			0				汉族						安徽省芜湖市		上海市虹口区	中国			2018-11-30		不存在明确被害人的纠纷						马宁		1		上海君恩律师事务所律师		0	0	0
04442_牛战军贩卖毒品罪一审刑事判决书		简易			0	（2018）辽0281刑初197号	1	牛战军	1974-11-15	完全刑事责任能力	1	44		1	汉族			无业		无业	辽宁省大连市		瓦房店市	中国	小学	2018-04-16	2018-04-13	拘留 逮捕	不存在明确被害人的纠纷												0	0	0
04443_李洪盗窃一审刑事判决书		简易			0	（2014）宝兴刑初字第17号	1	李洪	1967-12-23	完全刑事责任能力	1	47		1	汉族						四川省宝兴县			中国	初中	2014-04-05	2014-05-28	拘留 逮捕	其他存在明确被害人的纠纷												0	0	0
04444_王毓国非国家工作人员受贿案二审刑事判决书			1		0	（2015）筑刑二终字第33号	1	王某某	1965-03-10	完全刑事责任能力	1	50			汉族										大学本科	2014-04-10		拘留 逮捕	不存在明确被害人的纠纷						曾伟雄	余清凯			贵州维拓律师事务所	贵州维拓律师事务所	0	0	0		1	0	1
04445_郭光凯贩卖毒品一审刑事判决书		简易			0	（2016）渝0110刑初727号	1	郭光凯	1987-06-03	完全刑事责任能力	1	29			汉族			无业		无业		重庆市綦江区	重庆市綦江区		小学	2016-11-29	2016-12-19	拘留 逮捕	不存在明确被害人的纠纷												0	0	0
04452_被告人朱某故意伤害罪一审刑事判决书					0	（2013）东刑初字第492号	1	朱某			1				汉族							山东省利津县				2013-04-12	2013-10-17	拘留 逮捕	其他存在明确被害人的纠纷						何志勇	郭光营			山东正义之光律师事务所	山东正义之光律师事务所	0	0	1				1
04454_周某犯侵犯著作权罪一审刑事判决书		简易			0	（2013）温龙开刑初字第71号	1	周某																			2013-08-27	拘留 逮捕	不存在明确被害人的纠纷												0	0	0				1
04455_庄志坚强奸罪一审刑事判决书					0	（2017）浙0782刑初2020号	1	庄志坚	1983-03-11	完全刑事责任能力	1	30	0	0	汉族							浙江省金华市	浙江省金华市金东区		普通高级中学	2017-01-12	2017-08-24	拘留 逮捕	其他存在明确被害人的纠纷						童修江				浙江兴运律师事务所		0	0	0				1
04456_夏磊污染环境一审刑事判决书					0	（2018）皖1623刑初584号	1	夏磊	1981-10-02	完全刑事责任能力	1	36			汉族			其他		其他	安徽省利辛县			中国	初中	2018-08-22	2018-08-17	取保候审 取保候审 逮捕 取保候审	不存在明确被害人的纠纷						李利	张凌峰			安徽李利律师事务所	安徽宝诚律师事务所律师	0	0	0				1	1
04464_胡某伪造、变造、买卖国家机关公文、证件、印章一审刑事判决书					0	（2016）鲁0281刑初972号	1	胡某																		2016-09-29	2016-12-05	拘留 逮捕	不存在明确被害人的纠纷						张成京	隋振			山东文鼎律师事务所	山东文鼎律师事务所	0	0	0
04472_史本平盗窃一审刑事判决书		速裁			0	（2018）豫0106刑初9号	1	史本平	1970-07-18	完全刑事责任能力	1	48	1	1	汉族			无业		无业	郑州市金水区	郑州市金水区	郑州市	中国	初中	2017-09-30	2018-01-09	拘留 逮捕	其他存在明确被害人的纠纷						丁霖		1		河南九嘉律师事务所		0	0	0
04480_厚福顺、宋艳庆等强迫交易罪一审刑事判决书					0	（2017）辽0105刑初241号	3	厚福顺	1988-07-18	完全刑事责任能力	1	29	1	1	汉族			其他		服务人员		内蒙古自治区	内蒙古自治区通辽市			2016-09-09	2017-05-02	拘留 逮捕	其他存在明确被害人的纠纷						韩梅				辽宁广嘉律师事务所		0	0	0
04483_朱某某走私、贩卖、运输、制造毒品一审刑事判决书		简易			0	（2017）鄂0112刑初192号	1	朱某某			1															2017-01-06	2017-04-13	拘留 逮捕	不存在明确被害人的纠纷												0	0	0
04487_喻小银放火一审刑事判决书					0	（2016）赣0103刑初638号	1	喻小银	1992-12-11	完全刑事责任能力	1	24	1	1	汉族			无业		无业		江西省南昌市	南昌市新建区			2016-06-09	2016-08-31	拘留 逮捕	不存在明确被害人的纠纷												0	0	0				1
04489_李长全强奸一案一审刑事判决书					0	（2017）吉2401刑初582号	1	李长全	1972-03-27		1	42			汉族			无业		无业		吉林省洮南市	延吉市		初中	2017-07-28	2016-11-02	逮捕 拘留	其他存在明确被害人的纠纷												0	0	0				1
04490_黄坤峰强奸一案一审刑事判决书					0	（2012）郏刑初字第197号	1	黄坤峰	1976-04-17	完全刑事责任能力	1	36														2012-09-24	2012-11-07	拘留 逮捕	其他存在明确被害人的纠纷												0	0	0
04494_廖航非法持有毒品罪一审刑事判决书		简易			0	（2018）渝0102刑初731号	1	廖航	1993-03-05	完全刑事责任能力	1	25			汉族			无业		无业		重庆市涪陵区	重庆市涪陵区		初中	2018-07-25	2018-12-07	拘留 逮捕	不存在明确被害人的纠纷												0	0	0				1		1
04496_刘某某犯盗窃罪一审刑事判决书					0	（2014）北刑初字第122号	1	刘某某	1977-03-01	完全刑事责任能力	1	37			汉族						山西省忻州市神池县			中国		2014-02-27	2014-04-28	拘留 逮捕	其他存在明确被害人的纠纷												0	0	0
04497_胡延安 妨害信用卡管理一审刑事判决书		速裁			0	（2018）鄂0529刑初90号	1	胡延安	1991-11-02	完全刑事责任能力	1	27			汉族			无业		无业		湖北省五峰土家族自治县	湖北省五峰土家族自治县		初中		2018-11-30	取保候审	其他存在明确被害人的纠纷												0	0	0				1		1
04499_但鑫强奸一审刑事判决书					0	（2018）鄂1281刑初332号	1	但鑫	1994-03-22	完全刑事责任能力	1	24			汉族			务工		务工	赤壁市		赤壁市	中国		2018-09-19	2018-11-23	拘留 逮捕	家庭纠纷												0	0	0
04500_蒋某犯非法经营罪一审刑事判决书					0	（2015）花刑初字第488号	1	蒋某										无业		无业						2015-06-03	2015-09-06	拘留 逮捕	不存在明确被害人的纠纷						汪浚				贵州合兴律师事务所		0	0	0				1		1
04501_金某甲非法吸收公众存款罪一审刑事判决书					0	（2013）金义刑初字第1147号	1	金某甲	1954-10-08	完全刑事责任能力	0	59			汉族			务农		务农		浙江省义乌市					2013-04-23	取保候审 拘留	其他存在明确被害人的纠纷						何毅琦				浙江五联律师事务所义乌分所		0	0	0
04503_常紫恒危险驾驶罪一审刑事判决书					0	（2018）内0102刑初248号	1	常紫恒										其他		无固定职业	内蒙古自治区乌兰察布市		呼和浩特市	中国				拘留 取保候审													0	0	0				1
04504_赵越峰强奸一审刑事判决书		简易转普通			0	（2016）鲁0481刑初820号	1	赵越峰	1993-10-16	完全刑事责任能力		24														2016-07-10	2016-10-10	拘留 逮捕	其他存在明确被害人的纠纷												0	0	0
04507_郭某2走私、贩卖、运输、制造毒品一审刑事判决书		简易			0	（2017）沪0112刑初696号	1	郭某2	1972-10-27	完全刑事责任能力	1	45	1	1	汉族						上海市黄浦区			中国			2017-04-26														0	0	0				1		1
04515_董某某强奸一审刑事判决书					0	（2017）沪0109刑初534号	1	董某某	1993-09-19	完全刑事责任能力	1				汉族								上海市杨浦区						其他存在明确被害人的纠纷						许丹丹	王晶			上海申伦律师事务所	上海申伦律师事务所	0	0	0
04517_李建清交通肇事罪一审刑事判决书		速裁			0	（2019）闽0125刑初19号	1	李建清	1974-09-02	完全刑事责任能力	1	45			汉族			务工		务工		福建省永泰县	福建省永泰县		文盲			取保候审	其他存在明确被害人的纠纷												0	0	0
04520_李树彦非法占用农用地罪一审刑事判决书		简易			0	（2018）吉0381刑初680号	1	李树彦	1959-05-17	完全刑事责任能力	1	59			满族							吉林省公主岭市	吉林省公主岭市		初中	2018-10-23	2018-12-06	拘留 逮捕	不存在明确被害人的纠纷												0	0	0				1
04521_周口市龙图印刷有限公司、吴威振、王献迎侵犯著作权案一审刑事判决书					0	（2013）川刑初字第00257号	3	吴威振	1971-07-15	完全刑事责任能力	1	42										河南省汇川区				2013-08-02	2013-08-27	拘留 取保候审 逮捕 取保候审	其他存在明确被害人的纠纷						钞磊		1		周口市川汇区法律援助中心		0	0	0				1	1
04522_占俊龙盗窃一审刑事判决书		简易			0	（2019）粤1972刑初1665号	1	占俊龙	1992-02-01	完全刑事责任能力	1	27			汉族						湖南省祁东县		湖南省祁东县	中国	初中	2018-12-30	2019-05-21	拘留 逮捕	其他存在明确被害人的纠纷												0	0	0
04528_朱晨抢劫罪、强奸案一审刑事判决书					0	（2015）户刑初字第00099号	1	朱晨	1995-08-02	完全刑事责任能力	1	20			汉族			务农		务农					小学	2015-03-17	2015-05-13	拘留 逮捕	其他存在明确被害人的纠纷												0	0	0				1
04529_盐城市亭湖区人民检察院诉陈悦阳强奸罪再审刑事判决书					0	（2014）亭刑再初字第0002号	1	陈悦阳										无业		无业						2013-04-03		拘留 逮捕	其他存在明确被害人的纠纷						徐金林				江苏维世德律师事务所		0	0	0		1	0
04532_被告人张某、费某某盗窃一案一审刑事判决书		简易			0	（2017）陕0102刑初21号	2	张某	1969-06-14	完全刑事责任能力	1	47			汉族			无业		无业		陕西省西安市			初中		2016-12-21	拘留	其他存在明确被害人的纠纷												0	0	0
04537_邓旭贩卖毒品一审刑事判决书		简易			0	（2016）渝0105刑初1299号	1	邓旭	1990-05-17	完全刑事责任能力	1	26	1	1	汉族		0	其他		其他	重庆市合川区	重庆市合川区		中国	普通高级中学	2016-10-25	2016-11-11	拘留 逮捕	不存在明确被害人的纠纷												0	0	0				1	1
04538_高清超危险驾驶一审刑事判决书		速裁			0	（2019）沪0112刑初2423号	1	高清超	1990-02-10	完全刑事责任能力	1	29			汉族						山东省			中国			2019-10-29														0	0	0				1
04539_周孝兵走私、贩卖、运输、制造毒品罪一审刑事判决书		简易			0	（2016）渝0107刑初1651号	1	周孝兵			1		1	1	汉族			无业		无业					小学	2016-11-17	2016-12-13	拘留 逮捕	不存在明确被害人的纠纷												0	0	0
04540_姚某甲、姚某乙交通肇事、包庇一审刑事判决书		简易			0	（2017）湘0481刑初80号	2	姚某甲	1983-10-26	完全刑事责任能力	1	34			汉族			务农		务农		湖南省耒阳市			初中	2017-03-01	2017-03-01	拘留 取保候审 取保候审 逮捕 取保候审	其他存在明确被害人的纠纷												0	0	0				1	1
04543_邱剑峰走私、贩卖、运输、制造毒品一审刑事判决书		简易			0	（2017）闽0102刑初490号	1	邱剑峰	1978-06-25	完全刑事责任能力	1	39			汉族			无业		无业			福建省连江县		小学	2017-03-13	2017-06-06	拘留 逮捕	不存在明确被害人的纠纷												0	0	0
04558_谢某某滥伐林木罪一审刑事判决书		简易			0	（2014）右刑初字第123号	1	谢某某			1				汉族			其他		其他		内蒙古自治区喀喇沁旗	内蒙古自治区巴林右旗		初中		2014-09-18	取保候审	不存在明确被害人的纠纷												0	0	0					1
04559_陈某辉一审刑事判决书		简易			0	（2018）粤0118刑初1242号	1	陈某辉			1				汉族						广东省广州市增城区		广东省广州市增城区	中国	小学	2018-06-21	2018-09-20	拘留 逮捕	不存在明确被害人的纠纷												0	0	0
04565_蔡文荣、者海平非法制造、买卖、运输、邮寄、储存枪支、弹药、爆炸物、非法持有、私藏枪支、弹药一审刑事判决书					0	（2015）楚刑初字第31号	6	蔡文荣	1954-03-30	完全刑事责任能力	1	61			汉族			务农		务农		云南省楚雄市	云南省楚雄市		小学	2015-03-12	2014-12-19	取保候审 逮捕	不存在明确被害人的纠纷												0	0	0				1
04567_被告人王某1犯强奸罪一案的刑事判决书		简易			0	（2018）苏0115刑初206号	1	王某1	1973-08-30	完全刑事责任能力	1	45			汉族			无业		无业		江苏省南京市			小学	2018-01-26	2018-03-12	拘留 逮捕	其他存在明确被害人的纠纷						褚宇新				江苏苏晟律师事务所		0	0	0				1
04569_刘红贩卖毒品一审刑事判决书		简易			0	（2018）鄂0105刑初1052号	1	刘红	1974-10-31	完全刑事责任能力	0	44	1	1	汉族			无业		无业	湖北省武汉市汉阳区	湖北省武汉市	湖北省武汉市汉阳区	中国	普通高级中学	2018-10-19	2018-12-12	拘留 逮捕	不存在明确被害人的纠纷						张潇丹				湖北谦牧律师事务所		0	0	0				1
04571_杨在埙危险驾驶一审刑事判决书		简易			0	（2017）鲁0214刑初484号	1	杨在埙	1971-06-25	完全刑事责任能力	1	46						其他		其他	韩国		山东省青岛市城阳区	韩国	硕士研究生		2017-08-17	拘留 取保候审	不存在明确被害人的纠纷												0	0	0				1
04575_吴某甲非法持有、私藏枪支、弹药一审刑事判决书					0	（2015）中一法刑一初字第581号	1	吴某甲			1				汉族			务农		务农	中山市火炬开发区			中国	小学	2014-12-19	2015-03-27	拘留 逮捕	不存在明确被害人的纠纷						王春红				广东雅商律师事务所		0	0	0
04578_张海强故意伤害二审刑事判决书			1		0	（2014）苏中刑终字第0125号	1	张海强										其他		其他						2014-01-15		拘留 逮捕	其他存在明确被害人的纠纷						马恩杰				江苏公大律师事务所		0	0	0		0	1
04579_刘贵山非法持有枪支案刑事判决书			1		0	（2011）安刑一终字第308号	1	刘贵山	1959-04-03	完全刑事责任能力	1	52																	不存在明确被害人的纠纷												0	0	0		1	0		1
04580_黎国胜强奸二审刑事判决书			1		0	（2018）鲁13刑终485号	1	黎国胜	1984-12-13	完全刑事责任能力	1	34			汉族			务农		务农		山东省临沂市	山东省临沂市经济技术开发区		小学	2018-03-02		拘留 逮捕	其他存在明确被害人的纠纷												0	0	0		1	0
04585_何涛、赵给安走私、贩卖、运输、制造毒品二审刑事判决书			1		0	（2019）鄂刑终152号	2	何涛	1973-06-14	完全刑事责任能力	1	45			汉族			无业		无业	湖北省钟祥市	湖北省钟祥市		中国	小学	2017-09-27		拘留 逮捕	不存在明确被害人的纠纷						陶晶				湖北多能律师事务所		0	0	0		0	1
04586_袁某犯信用卡诈骗罪再审刑事判决书				1	0	（2013）甬奉刑再字第00002号	1	袁某										务农		务农								拘留 取保候审													0	0	0		1	0	1
04588_尚国新非法经营罪一审刑事判决书					0	（2017）川1002刑初79号	1	尚国新	1977-08-21	完全刑事责任能力	1	40			汉族			务农		务农							2017-03-06	取保候审	不存在明确被害人的纠纷												0	0	0
04589_付某、范某开设赌场罪一审刑事判决书					0	（2013）鄂郧西刑初字第00194号	2	付某	1978-06-09	完全刑事责任能力	0	35			汉族			无业		无业		湖北省郧西县			小学	2013-04-24	2013-10-31	拘留 逮捕 取保候审	不存在明确被害人的纠纷												0	0	0
04591_李冬海走私、贩卖、运输、制造毒品罪一审刑事判决书		速裁			0	（2018）粤0111刑初1819号	1	李冬海			1				汉族						湖南省衡南县		衡南县	中国	初中	2018-04-26	2018-07-20	拘留 逮捕	不存在明确被害人的纠纷												0	0	0				1		1
04594_徐东喜危险驾驶一审刑事判决书					0	（2018）鲁1083刑初70号	1	徐东喜	1976-01-19	完全刑事责任能力	1	42			汉族			其他		个体	山东省乳山市	山东省乳山市	山东省乳山市	中国	初中		2018-02-26	取保候审	不存在明确被害人的纠纷												0	0	0
04596_刘某某盗窃一审刑事判决书		简易			0	（2017）沪0117刑初1812号	1	刘某某	1994-12-19	完全刑事责任能力	1	23			汉族						陕西省西安市			中国			2017-11-09		其他存在明确被害人的纠纷						颜美星	苏秀萍			上海昌鑫律师事务所律师	上海昌鑫律师事务所律师	0	0	0				1
04599_被告人胡某贩卖毒品一案的刑事判决书		简易			0	（2017）苏0106刑初27号	1	胡某	1987-06-28	完全刑事责任能力	1	30			汉族			无业		无业					初中	2016-11-15	2017-01-03	拘留 取保候审 逮捕	不存在明确被害人的纠纷												0	0	0				1
04606_杨某甲走私、贩卖、运输、制造毒品罪2016刑初1380一审刑事判决书		简易			0	（2016）粤0105刑初1380号	1	杨某甲													广西壮族自治区田阳县			中国		2016-08-24	2016-11-17	拘留 逮捕	不存在明确被害人的纠纷												0	0	0
04607_吴xx危险驾驶一审刑事判决书		速裁			0	（2016）豫0122刑初12号	1	吴xx	1984-09-01	完全刑事责任能力	1	32	0	0			0										2016-01-01	拘留 取保候审	不存在明确被害人的纠纷												0	0	0				1	1
04608_赵某某、濮阳某某开设赌场案一审刑事判决书		简易			0	（2014）宣刑初字第00373号	2	赵某某			0												南京市高淳区			2014-08-28	2014-12-05	拘留 逮捕	不存在明确被害人的纠纷						周忠民				安徽梅志宏律师事务所律师		0	0	0
04613_颜某犯盗窃罪、寻衅滋事罪沈某甲、陆某等犯掩饰、隐瞒犯罪所得、犯罪所得收益罪、寻衅滋事罪一审刑事判决书		普通			0	（2016）浙0483刑初233号	4	颜某						1				务工		务工						2015-10-29	2016-03-15	拘留 逮捕	其他存在明确被害人的纠纷												0	0	0
04617_被告人刘飞贩卖毒品一案一审刑事判决书		简易			0	（2017）辽0106刑初551号	1	刘飞	1993-07-11	完全刑事责任能力	1	24	1	1	汉族		0	无业		无业		辽宁省沈阳市	辽宁省沈阳市铁西区		初中	2017-05-27	2017-08-16	拘留 逮捕	不存在明确被害人的纠纷												0	0	0
04618_宁×容留他人吸毒罪一审刑事判决书		简易			0	（2014）朝刑初字第3491号	1	宁x	1981-02-28	完全刑事责任能力	1	33														2014-10-12	2014-11-25	拘留 取保候审 逮捕	不存在明确被害人的纠纷												0	0	0				1
04619_张涛强奸罪一审刑事判决书		简易			0	刑事判决书 （2018）浙0212刑初150号	1	张涛	1987-11-07	完全刑事责任能力	1	31		1	汉族			其他		健身教练	浙江省宁波市江北区	浙江省宁波市	浙江省宁波市鄞州区	中国	高等专科学校	2017-08-28	2018-01-16	拘留 逮捕	其他存在明确被害人的纠纷						赵云贵				浙江明州律师事务所律师		0	0	0
04624_彭月珍诈骗一审刑事判决书		简易			0	（2019）京0101刑初345号	1	彭月珍	1955-09-14	完全刑事责任能力	0	63			汉族			其他		有限责任公司退休干部		北京市	北京市东城区		硕士研究生		2019-05-10	拘留	其他存在明确被害人的纠纷												0	0	0
04626_王某某、白某某开设赌场一案一审刑事判决书					0	（2018）辽0303刑初369号	2	王某某	1965/0/0	完全刑事责任能力	1	53	0	0	汉族		0	无业		无业	辽宁省鞍山市立山区	鞍山市	辽宁省鞍山市铁西区	中国	初中		2018-07-26	拘留 取保候审	不存在明确被害人的纠纷						李晓彤				辽宁钢城正大律师事务所律师		0	0	0				1	1
04636_王X、李XX故意伤害一审刑事判决书		简易			0	（2019）津0102刑初66号	2	王x	1984-03-06	完全刑事责任能力	1	35		1	汉族						天津市河东区	天津市	天津市河东区	中国	初中	2018-01-23	2019-02-01	拘留 逮捕 取保候审	其他存在明确被害人的纠纷												0	0	0				1
04637_张小胜生产、销售伪劣产品一审刑事判决书		简易			0	（2015）潮平法刑初字第142号	1	张某胜	1989-07-24	完全刑事责任能力	1	26														2015-06-05	2015-08-14	拘留 逮捕	不存在明确被害人的纠纷						吴文德	张文魁			福建法益律师事务所律师	福建法益律师事务所实习律师	0	0	0				1
04641_孙书伟滥伐林木一审刑事判决书		速裁			0	（2019）豫0185刑初162号	1	孙书伟	1973-05-07	完全刑事责任能力	1	46	0	0	汉族		0	其他		渣土清运公司员工		河南省登封市	河南省登封市		初中		2019-04-03	取保候审	不存在明确被害人的纠纷												0	0	0				1		1
04643_李留学破坏电力设备罪、盗窃案一审刑事判决书					0	（2012）汝刑初字第47号	1	李留学	1967-04-29	完全刑事责任能力	1	45			汉族			务农		务农			河南省汝州市		小学	2011-11-17	2012-02-09	拘留 逮捕	不存在明确被害人的纠纷												0	0	0				1
04647_杨某走私、贩卖、运输、制造毒品一审刑事判决书		简易			0	（2016）桂0802刑初219号	1	杨某			1				汉族			无业		无业		广西壮族自治区贵港市港南区			初中	2016-02-24	2016-06-20	拘留 逮捕	不存在明确被害人的纠纷												0	0	0				1
04649_李立新盗窃罪一审刑事判决书					0	（2015）赞刑初字第10号	1	李立新					1	1			0	务农		务农						2014-09-29	2014-12-31	拘留 逮捕	其他存在明确被害人的纠纷												0	0	0				1
04650_被告人王某甲犯强制猥亵罪一案的刑事判决书		简易			0	（2016）苏0115刑初640号	1	王某甲	1988-12-29	完全刑事责任能力	1	28			汉族			务工		务工						2016-05-14	2016-07-08	拘留 逮捕	其他存在明确被害人的纠纷												0	0	0
04655_王勇合同诈骗一案一审刑事判决书		简易			0	（2014）绥刑初字第158号	1	王勇	1976-02-09	完全刑事责任能力	1	38															2014-08-25		其他存在明确被害人的纠纷												0	0	0				1
04657_张源婢滥伐林木罪一审刑事判决书		简易			0	（2019）闽0783刑初259号	1	张源婢	1974-05-13	完全刑事责任能力	1	45		1	汉族			务农		务农	建瓯市		建瓯市	中国	初中		2019-06-11	取保候审	不存在明确被害人的纠纷												0	0	0				1	1
04660_陈万军盗窃二审刑事判决书			1		0	（2017）云04刑终180号	1	陈万军	1971-05-18	完全刑事责任能力	1	46	1	1	汉族		0	务农		农业职业	云南省富宁县		云南省	中国	小学			拘留 逮捕	其他存在明确被害人的纠纷												0	0	0		1	0
04661_魏德勇强奸罪一审刑事判决书		简易			0	（2017）浙0411刑初674号	1	魏德勇	1995-04-13	完全刑事责任能力	1	22	0	0	汉族		0				云南省永善县			中国	初中	2015-05-27	2017-11-17	拘留 逮捕	其他存在明确被害人的纠纷						沈强				浙江嘉韬律师事务所律师		0	0	0
04663_孙某容留他人吸毒一审刑事判决书		简易			0	（2018）沪0114刑初257号	1	孙某	1993-11-30	完全刑事责任能力	1	25		1	汉族						上海市长宁区			中国			2018-02-08		不存在明确被害人的纠纷						饶思				北京市中伦文德律师事务所上海分所律师		0	0	0
04665_努尔买买提·库尔班走私、贩卖、运输、制造毒品一审刑事判决书		简易			0	（2018）沪0106刑初636号	1	努尔买买提·库尔班	1974-11-28	完全刑事责任能力	1	44		1	维吾尔族						新疆维吾尔自治区			中国			2018-06-04		不存在明确被害人的纠纷												0	0	0
04667_龙涛走私、贩卖、运输、制造毒品一审刑事判决书		简易			0	（2018）粤0113刑初354号	1	龙涛	1986-10-19	完全刑事责任能力	1	32			汉族						湖南省耒阳市			中国	小学	2017-11-24	2018-02-08	拘留 逮捕	不存在明确被害人的纠纷												0	0	0				1		1
04668_王河发破坏公用电信设施一审刑事判决书					0	（2015）金刑初字第428号	1	王河发	1979-08-15	完全刑事责任能力	1	36			汉族											2014-12-30	2015-06-04	拘留 逮捕	不存在明确被害人的纠纷												0	0	0
04670_无锡恒基换热设备有限公司、蔡伟虚开增值税专用发票、用于骗取出口退税、抵扣税款发票罪一审刑事判决书		简易			0	（2017）苏0205刑初299号	2	无锡恒基换热设备有限公司																			2017-05-23		不存在明确被害人的纠纷												0	0	0
04672_金朝枫容留他人吸毒一审刑事判决书		简易			0	（2018）沪0115刑初1389号	1	金朝枫	1972-11-28	完全刑事责任能力	0	46			汉族						上海市普陀区		上海市浦东新区	中国			2018-04-09		不存在明确被害人的纠纷												0	0	0
04673_陈玉全职务侵占一审刑事判决书					0	（2015）虹刑初字第43号	1	陈玉全																			2015-01-07		其他存在明确被害人的纠纷						王秋湘				上海市海华永泰律师事务所		0	0	0
04674_杨文洲容留他人吸毒一审刑事判决书		简易			0	（2016）闽0212刑初786号	1	杨文洲	1972-12-20	完全刑事责任能力	1	44	1	1	汉族			无业		无业	贵州省松桃苗族自治县			中国	初中		2016-11-19	取保候审	不存在明确被害人的纠纷												0	0	0				1
04675_何修峰非法占用农用地一审刑事判决书					0	（2017）鄂1083刑初211号	1	何修峰	1962-11-08		1	55			汉族			务农		务农		湖北省洪湖市	湖北省洪湖市		普通高级中学		2017-10-19	取保候审 逮捕 取保候审	不存在明确被害人的纠纷												0	0	0					1
04676_龚勋职务侵占一审刑事判决书		普通			0	（2017）赣0102刑初1005号	1	龚勋	1990-03-22	完全刑事责任能力	1	27			汉族			其他		公司职工			江西省南昌市东湖区		普通高级中学	2017-10-30	2017-12-13	拘留 逮捕	其他存在明确被害人的纠纷												0	0	0				1	1
04677_曹俊走私、贩卖、运输、制造毒品一审刑事判决书		简易			0	（2018）鄂0116刑初92号	1	曹俊	1992-11-29	完全刑事责任能力	1	26			汉族			务工		务工			湖北省武汉市黄陂区		初中	2017-09-30	2018-01-22	拘留 逮捕	不存在明确被害人的纠纷												0	0	0
04679_李勇贩卖毒品一审刑事判决书		简易			0	（2016）渝0106刑初1298号	1	李勇	1970-09-05	完全刑事责任能力	1	46		1	汉族			其他		无固定职业			重庆市潼南区		小学	2016-08-19	2016-10-11	拘留 逮捕	不存在明确被害人的纠纷												0	0	0
04684_吴立峰抢劫罪一审刑事判决书		简易			0	（2018）闽0123刑初334号	1	吴立峰	1987-08-22	完全刑事责任能力	1	41	1	1	汉族			无业		无业	福建省罗源县	福建省罗源县		中国		2018-04-24	2018-12-21	拘留 逮捕	其他存在明确被害人的纠纷						李德团				福建文园律师事务所		0	0	0
04686_袁治伟组织、领导传销活动罪一审刑事判决书		普通			0	（2017）鄂0111刑初112号	1	袁治伟	1964-12-18	完全刑事责任能力	1	53			汉族			无业		无业		安徽省阜南县	安徽省阜阳市		小学	2016-11-09	2017-01-17	拘留 逮捕	不存在明确被害人的纠纷						燕非	阳刘			湖北林熙律师事务所	湖北林熙律师事务所	0	0	0				1
04687_方涛走私、贩卖、运输、制造毒品一审刑事判决书					0	（2018）浙0523刑初60号	1	方涛	1987-01-09	完全刑事责任能力	1	31	1	1	汉族						浙江省安吉县		安吉县	中国	初中	2017-02-24	2018-01-22	拘留 逮捕	不存在明确被害人的纠纷												0	0	0				1
04688_陈某某贩毒案一审刑事判决书		简易			0	（2017）苏0505刑初480号	1	陈某某	1990-07-25	完全刑事责任能力	1	27			汉族										初中	2017-09-22	2017-09-22	取保候审 拘留 逮捕	不存在明确被害人的纠纷												0	0	0				1
04689_王家超、徐鹏达走私、贩卖、运输、制造毒品一审刑事判决书		简易			0	（2018）浙0102刑初151号	2	王家超	1997-12-14	完全刑事责任能力	1	21			汉族			其他		个体经营户	松江区	上海市松江县		中国	普通高级中学		2018-03-29	拘留 取保候审	不存在明确被害人的纠纷												0	0	0				1
04691_赵洪安非法狩猎罪一审刑事判决书		简易			0	（2018）吉0702刑初263号	1	赵洪安			1												宁江区					拘留 取保候审	不存在明确被害人的纠纷												0	0	0				1	1
04694_谷某某月犯故意伤害罪一审刑事判决书		速裁			0	（2017）辽0112刑初339号	1	谷某某月	1967-03-23	完全刑事责任能力	0	33			满族			无业		无业	辽宁省开原市	辽宁省开原市	沈阳市浑南区	中国	小学			拘留 取保候审	其他存在明确被害人的纠纷												0	0	0				1		1
04696_李鹏涛、郭纪伟非法经营一案一审刑事判决书		简易			0	（2014）普刑初字第25号	2	郭纪伟		完全刑事责任能力	1	19														2013-09-30	2014-01-27	拘留 逮捕	不存在明确被害人的纠纷						李光林				贵州心达律师事务所		0	0	0				1	1
04702_常某某盗窃一审刑事判决书		简易			0	（2018）豫0702刑初384号	1	常某某	1996-10-15	完全刑事责任能力	1	22			汉族			无业		无业	安徽省濉溪县		安徽省濉溪县	中国	中专（包括职业高中，中等专业学校，技工学校）	2018-06-19	2018-09-05	拘留 逮捕	其他存在明确被害人的纠纷												0	0	0
04705_周志东强奸一审刑事判决书					0	（2017）云0125刑初479号	1	周志东	1973-09-27	完全刑事责任能力	1	44			汉族			务农		务农	云南省昆明市宜良县		宜良县	中国		2017-08-07	2017-11-03	拘留 逮捕	其他存在明确被害人的纠纷												0	0	0
04707_郑新禹走私、贩卖、运输、制造毒品罪一审刑事判决书		简易			0	（2016）辽0102刑初1092号	1	郑新禹	1994-06-12	完全刑事责任能力	1	22			汉族			无业		无业	辽宁省沈阳市浑南区	辽宁省沈阳市		中国		2016-11-15	2016-11-11	取保候审 监视居住 逮捕	不存在明确被害人的纠纷						王利				辽宁申扬律师事务所		0	0	0				1	1
04708_张学成走私、贩卖、运输、制造毒品罪一审刑事判决书		简易			0	（2017）苏0509刑初1776号	1	张学成	1992-04-11	完全刑事责任能力	1	25		1	汉族			无业		无业			苏州市吴江区		初中	2017-06-29	2017-11-02	拘留 逮捕	不存在明确被害人的纠纷						倪国林				江苏紫东律师事务所		0	0	0
04710_耿某、刘某2贩卖毒品一审刑事判决书		简易			0	（2017）沪0110刑初1091号	2	耿某	1978-10-27	完全刑事责任能力	1	39			汉族								上海市长宁区				2017-11-13		不存在明确被害人的纠纷						罗勇				上海国定律师事务所		0	0	0				1		1
04711_曾庆武一审刑事判决书		简易			0	（2017）粤0103刑初733号	1	曾庆武	1963-08-19	完全刑事责任能力	1	54			汉族								广东省海丰县		文盲	2017-04-19	2017-07-11	拘留 逮捕	不存在明确被害人的纠纷												0	0	0
04715_金秋鸿危险驾驶一审刑事判决书		简易			0	（2017）沪0114刑初1466号	1	金秋鸿	1973-02-07	完全刑事责任能力	1	44			汉族						上海市宝山区			中国			2017-09-05		不存在明确被害人的纠纷												0	0	0
04716_高某某犯非法储存爆炸物罪一审刑事判决书					0	（2014）新刑初字第219号	1	高某某	1966-03-22	完全刑事责任能力	1	48			汉族												2014-09-30	拘留 取保候审													0	0	0				1
04717_祝某犯走私、贩卖、运输、制造毒品罪一审刑事判决书		简易			0	（2017）辽0103刑初522号	1	祝某						1				无业		无业						2017-08-16	2017-08-09	拘留 取保候审 监视居住 逮捕													0	0	0
04718_金银茹走私、贩卖、运输、制造毒品一审刑事判决书		简易			0	（2016）粤1702刑初596号	1	金银茹	1971-03-03	完全刑事责任能力	0	45	0	0	汉族			其他		药店经营者	阳江市阳东区		阳江市阳东区	中国		2016-07-15	2016-11-08	拘留 逮捕	不存在明确被害人的纠纷						苏恭磊				广东东方昆仑律师事务所		0	0	0				1	1
04719_苗凤妹走私、贩卖、运输、制造毒品罪一审刑事判决书		简易			0	（2016）苏0509刑初1895号	1	苗凤妹	1963-10-09	完全刑事责任能力	0	53			汉族			无业		无业			苏州市吴江区		小学	2016-07-22	2016-12-07	拘留 逮捕	不存在明确被害人的纠纷												0	0	0				1
04720_温某通寻衅滋事罪一审刑事判决书		简易			0	（2016）粤0304刑初2061号	1	温某通			1				汉族			其他		公司业务员	广东省河源市紫金县			中国	初中	2016-09-30	2016-12-29	拘留 逮捕	其他存在明确被害人的纠纷												0	0	0				1
05061_（2014）海刑初字第59号刑事判决书		简易			0	（2014）海刑初字第59号	1	陈某甲																		2013-10-26	2014-01-21	拘留 逮捕	其他存在明确被害人的纠纷						张静宇		1		广西海城律师事务所律师		0	0	0				1	1
05062_赵鹏飞抢劫一审刑事判决书					0	（2018）沪0112刑初589号	1	赵鹏飞	1994-03-10	完全刑事责任能力	1	24			汉族						河南省			中国			2018-04-17		其他存在明确被害人的纠纷						任明飞		1		上海合勤律师事务所		0	0	0
05063_李超犯组织、领导、参加黑社会性质组织罪、聚众斗殴罪一审刑事判决书					0	（2015）南刑初字第00347号	1	李超	1979-10-06	完全刑事责任能力	1	36		1	汉族			无业		无业		南陵县	南陵县				2015-11-17	取保候审	不存在明确被害人的纠纷												0	0	0				1	1
05064_邰某甲、邰某乙等故意伤害一审刑事判决书					0	（2013）珲刑初字第309号	6	邰某甲	1967-03-15	完全刑事责任能力	1	47			满族			务农		务农	吉林省珲春市		吉林省珲春市	中国	初中		2013-12-10	取保候审	其他存在明确被害人的纠纷												0	0	0				1
05065_卢寒、李明等诈骗一审刑事判决书		普通			0	（2018）沪0117刑初1880号	7	卢寒	1981-01-06	完全刑事责任能力	1	38			汉族								上海市松江区				2018-11-22		其他存在明确被害人的纠纷						陆铮毅	吴奔			上海市同一律师事务所	上海融栢律师事务所	0	0	0
05066_陈健强奸罪一审刑事判决书		简易			0	（2018）浙0102刑初300号	1	陈健	1987-09-12	完全刑事责任能力	1	31															2018-08-09		其他存在明确被害人的纠纷						周臻宇				浙江思伟律师事务所律师		0	0	0				1		1
05067_李勇非法占用农用地一审刑事判决书		简易转普通			0	（2018）鄂0381刑初192号	1	李勇	1966-08-12	完全刑事责任能力	1	52	0	0	汉族			其他		合作社法定代表人		湖北省丹江口市	湖北省丹江口市		高等专科学校			取保候审	不存在明确被害人的纠纷						朱之成				湖北遇真律师事务所		0	0	1				1	1
05068_许东华强奸一审刑事判决书		简易			0	（2018）闽0582刑初1638号	1	许东华	1993-11-17	完全刑事责任能力	1	26			汉族			务农		务农		贵州省思南县	思南县		小学	2018-07-02	2018-07-02	拘留 逮捕	其他存在明确被害人的纠纷						吴庆瑞				福建公爵律师事务所律师。		0	0	0
05069_商小华、叶静走私、贩卖、运输、制造毒品一审刑事判决书		简易			0	（2018）鄂0117刑初556号	2	商小华										其他		其他						2018-05-31	2018-10-08	拘留 逮捕	不存在明确被害人的纠纷						姚应军				湖北安达诚律师事务所		0	0	0
05071_任某某等人故意伤害一审刑事判决书		普通			0	（2018）津0102刑初19号	4	任某某	1990-03-01	完全刑事责任能力	1	28			汉族			其他		公司职工	黑龙江省拜泉县	黑龙江省	天津市北辰区	中国	小学	2017-06-23	2018-01-03	拘留 逮捕	其他存在明确被害人的纠纷						高明				天津臻恒律师事务所		0	0	0				1
05073_元汉城、林佑群走私、贩卖、运输、制造毒品、容留他人吸毒一审刑事判决书					0	（2015）佛中法刑一初字第95号	3	元汉城			1				汉族			务工		务工	惠来县			中国	初中	2014-11-14	2015-08-13	拘留 逮捕	不存在明确被害人的纠纷						许升鹏				广东君之杰律师事务所		0	0	0
05074_李龙、李川等强迫卖淫罪一审刑事判决书		普通			0	（2015）鄂江汉刑初字第00775号	3	李龙	1996-03-08	完全刑事责任能力	1	19			土家族			无业		无业					中专（包括职业高中，中等专业学校，技工学校）	2014-10-10	2015-05-15	拘留 逮捕	其他存在明确被害人的纠纷						王达理				湖北多能律师事务所		0	0	0				0
05075_潘恒峰犯非法制造、买卖、运输、邮寄、储存枪支、弹药、爆炸物罪一审刑事判决书					0	（2015）固刑初字第00156号	1	潘恒峰	1971-12-05	完全刑事责任能力	1	44			汉族			其他		个体户		安徽省固镇县	安徽省固镇县			2015-03-03	2015-06-05	拘留 逮捕	不存在明确被害人的纠纷						周波				安徽振固律师事务所		0	0	0
05076_朱庆海组织、领导、参加黑社会性质组织、抢劫、敲诈勒索一审刑事判决书					0	（2019）津0106刑初90号	1	朱庆海	1988-10-06	完全刑事责任能力	1	31			汉族						天津市	天津市		中国	高等专科学校		2019-04-01		其他存在明确被害人的纠纷						杨杨				天津北洋律师事务所		0	0	0				1		1
05077_江文才等非法吸收公众存款一审刑事判决书					0	（2018）京0105刑初442号	12	江文才	1970-03-10	完全刑事责任能力	1	49			汉族			其他		有限公司法定代表人、董事长	北京市朝阳区	四川省		中国	硕士研究生	2017-03-17	2018-02-06	逮捕 拘留	不存在明确被害人的纠纷						原伟				北京金诚同达律师事务所		0	0	0
05078_易东海非法获取计算机信息系统数据、非法控制计算机信息系统一审刑事判决书		简易			0	（2018）鄂0106刑初308号	1	易东海	1984-05-01	完全刑事责任能力	1	34			汉族			无业		无业	湖南省株洲市荷塘区	湖南省株洲市		中国	中专（包括职业高中，中等专业学校，技工学校）	2017-09-30	2018-03-27	拘留 逮捕	其他存在明确被害人的纠纷						曹明				安徽法卫律师事务所		0	0	0				1
05079_526董朝阳故意伤害罪一审刑事判决书		简易			0	（2017）苏0803刑初526号	1	董朝阳			1				汉族			其他		国通快递员工			淮安市淮安区				2017-10-10	取保候审	其他存在明确被害人的纠纷												0	0	0
05080_瞿某某犯故意伤害罪一审刑事判决书					0	（2016）湘1281刑初149号	1	瞿某某										务农		务农						2016-11-02	2016-10-18	拘留 取保候审 逮捕 取保候审	邻里矛盾						刘辉		1		湖南省怀化市洪江区法律援助中心		0	0	1					1
05081_张春玉（虚开发票）抗诉案二审刑事判决书				1	0	（2018）辽08刑终34号	1	张春玉	1965-03-24	完全刑事责任能力	0	53		1							辽宁省盖州市		辽宁省盖州市	中国		2017-09-05		取保候审 逮捕 取保候审	不存在明确被害人的纠纷						杨松		1		营口市法律援助中心		0	0	0		1	0		1
05082_林某犯危险驾驶罪一审刑事判决书		简易转普通			0	（2016）苏0583刑初1470号	1	林某										无业		无业						2016-09-22	2016-08-30	取保候审 逮捕	其他存在明确被害人的纠纷												0	0	0
05083_孟庆晓等抢劫罪一审刑事判决书		普通			0	（2017）鲁0181刑初160号	5	孟庆晓	1989-04-23	完全刑事责任能力	1	29			汉族			无业		无业		山东省济南市	山东省济南市		中专（包括职业高中，中等专业学校，技工学校）	2016-08-11	2017-05-11	拘留 逮捕	其他存在明确被害人的纠纷						赵序伟	商苗苗			山东鲁明律师事务所	山东鲁明律师事务所	0	0	0
05084_彭某盗窃罪一审刑事判决书					0	（2014）穗越法刑初字第523号	1	彭某	1972-02-29	完全刑事责任能力	0	42	1	1	汉族		0					广东省罗定市			初中	2013-09-11	2014-04-14	拘留 逮捕	其他存在明确被害人的纠纷												0	0	0
05085_崔德牛、沈强、卢高翔等敲诈勒索罪一审刑事判决书					0	（2018）浙0191刑初83号	6	崔德牛	1976-12-19	完全刑事责任能力	1	42	1	1	汉族		0	其他		个体经营户	安徽省颍上县			中国	初中	2017-05-04	2018-03-14	拘留 逮捕	其他存在明确被害人的纠纷						杨明明				浙江杭一律师事务所		0	0	0				1
05086_徐某甲、徐双虎等盗窃罪，柴某掩饰、隐瞒犯罪所得、犯罪所得收益罪一审刑事判决书		简易			0	（2014）宜刑二初字第319号	5	徐某甲						1				无业		无业						2014-06-13	2014-09-28	拘留 逮捕	其他存在明确被害人的纠纷						曹春亮				江苏环科园律师事务所		0	0	0				1
05088_朱菊如寻衅滋事一审刑事判决书					0	（2018）赣0502刑初459号	1	朱菊如	1962-08-17	完全刑事责任能力	1	57	1	1	汉族		0	无业		无业		江西省樟树市	新余市渝水区		高等专科学校	2018-07-04	2018-11-02	拘留 逮捕	不存在明确被害人的纠纷												0	0	0
05089_杨某犯盗窃罪一审刑事判决书					0	（2016）浙0303刑初611号	1	杨某										无业		无业						2016-06-02	2016-04-25	拘留 监视居住 逮捕	其他存在明确被害人的纠纷						陈文胜				云南弘石律师事务所		0	0	0				1
05090_黄学军抢劫案一审刑事判决书					0	（2014）松刑初字第2201号	1	黄学军																			2014-11-26		其他存在明确被害人的纠纷						颜美星				上海昌申律师事务所		0	0	0				1
05091_曾南强奸一审刑事判决书					0	（2012）北刑初字第181号	1	曾南	1990-03-26	完全刑事责任能力	1	23			汉族			务农		务农		广西壮族自治区北流市	北流市		初中	2012-03-29	2012-06-19	拘留 逮捕	其他存在明确被害人的纠纷						梁广进	李科强			广西桂京律师事务所		0	0	1
05092_汪静走私、贩卖、运输、制造毒品一审刑事判决书		简易			0	（2018）鄂0111刑初717号	1	汪静	1969-08-17	完全刑事责任能力	1	49			汉族			其他		无固定职业	湖北省武汉市青山区		湖北省武汉市青山区	中国	中专（包括职业高中，中等专业学校，技工学校）	2018-02-12	2018-06-28	拘留 逮捕	不存在明确被害人的纠纷												0	0	0				1
05093_李志云、肖松林、张尚江等敲诈勒索罪一审刑事判决书		普通			0	（2018）浙0103刑初506号	5	李志云	1985-02-15	完全刑事责任能力	1	33			汉族			其他		微贷网员工	安徽省阜阳市颍州区			中国	中专（包括职业高中，中等专业学校，技工学校）	2018-03-21	2018-10-15	拘留 逮捕	其他存在明确被害人的纠纷						孙祥环				浙江君策律师事务所		0	0	0				1
05094_山西省繁峙县人民法院 刑事判决书 （2016）晋0924刑初8号					0	（2016）晋0924刑初8号	2	左国生	1984-09-25	完全刑事责任能力	1	32			汉族						山西省繁峙县		繁峙县	中国	高等专科学校	2015-02-12	2015-07-29	拘留 逮捕	其他存在明确被害人的纠纷												0	0	0				1
05095_伍某等八人非法持有枪支、故意伤害、非法拘禁、开设赌场案刑事判决书					0	（2009）长县刑初字第148号	8	伍某	1976-11-08	完全刑事责任能力	1	33			汉族			无业		无业	浏阳市	湖南省浏阳市	长沙县	中国	初中	2008-10-17	2009-03-30	逮捕 拘留	不存在明确被害人的纠纷												0	0	0				1
05097_修树生强奸一审刑事判决书					0	（2018）辽1321刑初173号	1	修树生	1949-08-18	完全刑事责任能力	1	69			汉族			务农		务农	辽宁省朝阳县		辽宁省朝阳县	中国	小学	2018-07-17	2018-12-10	拘留 逮捕	其他存在明确被害人的纠纷												0	0	0
05098_吴鹏信用卡诈骗一审刑事判决书		简易转普通			0	（2015）中一法刑二初字第48号	1	吴鹏	1983-03-02	完全刑事责任能力	1	32	1	1	仫佬族			务农		务农	宜州市	广西壮族自治区宜州市		中国	小学	2014-09-27	2014-12-25	拘留 逮捕	其他存在明确被害人的纠纷												0	0	0
05099_余某某犯挪用公款罪一审刑事判决书	1	简易			0	（2013）云法刑初字第00331号	1	余某某	1971-02-01	完全刑事责任能力	1	42			汉族			其他		事业单位工作人员		重庆市云阳县			高等专科学校		2013-09-26	取保候审	不存在明确被害人的纠纷						彭祖权				重庆龙脊律师事务所		0	0	0
05100_张胜犯非法吸收公众存款罪一审刑事判决书					0	（2015）盐刑初字第56号	1	张胜			1				汉族											2013-08-14	2015-05-06	拘留 逮捕	其他存在明确被害人的纠纷						顾雄峰				四川川北律师事务所		0	0	0
05101_卢成业、袁子峰、江玉春等虚开增值税专用发票、用于骗取出口退税、抵扣税款发票罪一审刑事判决书					0	（2019）浙0702刑初132号	6	卢成业	1952-11-06	完全刑事责任能力	1	47			汉族			其他		有限公司法定代表人	上海市杨浦区	上海市杨浦区		中国	小学	2018-02-01	2019-01-30	拘留 逮捕	不存在明确被害人的纠纷						汪秀平	赵峰			北京市京师（无锡）律师事务所	北京市京师（无锡）律师事务所	0	0	0				1
05102_朱某、周某交通肇事一审刑事判决书	1				0	（2017）赣0830刑初11号	1	朱某	1962-04-09	完全刑事责任能力	1	57			汉族			其他		务农兼司机		江西省永新县	江西省永新县		初中	2016-03-18	2016-05-19	拘留 逮捕 取保候审	其他存在明确被害人的纠纷												0	0	1
05103_田某某、何某某抢劫一审刑事判决书					0	（2017）云2624刑初90号	2	田某某	1998-01-15	完全刑事责任能力	1	19		1	壮族			无业		无业	云南省麻栗坡县		云南省文山壮族苗族自治州麻栗坡县	中国	普通高级中学	2016-12-08	2017-08-02	拘留 逮捕	其他存在明确被害人的纠纷						肖炜捷	李伟			云南杨柏王律师事务所	云南杨柏王律师事务所	0	0	0				1
05105_金某某、金某甲犯故意伤害罪一审刑事判决书					0	（2014）东陵刑初字第251号	2	金某某			1			1	汉族						浙江省诸暨市		沈阳市东陵区	中国	初中	2013-12-19	2014-04-17	拘留 逮捕	其他存在明确被害人的纠纷						韩鹏				辽宁文化律师事务所		0	0	0				1
05106_马凤春诈骗一案一审刑事判决书					0	（2011）濮刑初字第215号	1	马凤春	1968-07-15	完全刑事责任能力	0	43														2011-02-23	2011-05-09	拘留 逮捕	其他存在明确被害人的纠纷												0	0	0				1
05107_斯壹军走私珍贵动物、珍贵动物制品罪二审刑事判决书			1		0	（2014）浙刑二终字第47号	1	斯壹军																		2013-11-01		拘留 逮捕	不存在明确被害人的纠纷												0	0	0		1	0
05108_赵某成故意伤害二审刑事判决书			1		0	（2016）粤05刑终2号	1	赵某成	1958-10-02	完全刑事责任能力	1	58			汉族			无业		教师	湖南省衡阳市衡东县	湖南省衡阳市	汕头市金平区	中国	中专（包括职业高中，中等专业学校，技工学校）			拘留 取保候审	其他存在明确被害人的纠纷						邱志强				广东潮之荣律师事务所		0	0	0		1	0		1
05109_李海林受贿一审刑事判决书	1				0	（2013）通刑初字第255号	1	李海林	1957-09-26	完全刑事责任能力	1	57			汉族			其他		有限公司部长		云南省玉溪市红塔区	云南省昆明市		硕士研究生	2013/7/26#2013/11/27	2013-11-01	监视居住 拘留 逮捕 取保候审 逮捕	不存在明确被害人的纠纷			1	0		刘玉萍	钱磊			云南新海天律师事务所	云南新海天律师事务所	0	0	0
05110_张洪吉强奸一审刑事判决书					0	（2017）吉0822刑初161号	1	张洪吉	1980-03-05	完全刑事责任能力	1	37			汉族			务农		务农	吉林省通榆县			中国	初中	2017-08-10		拘留 逮捕	邻里矛盾						巩诗园	李晓哲			吉林巩固律师事务所	吉林良佐律师事务所	0	0	0
05111_王海生、刘培、翟超犯诈骗罪二审刑事判决书			1		0	（2016）鲁05刑终36号	3	王海生																					其他存在明确被害人的纠纷												0	0	0		0	1
05112_黄某某、胡某某掩饰、隐瞒犯罪所得、犯罪所得收益罪一审刑事判决书		普通			0	（2017）苏0982刑初468号	2	黄某某	1991-10-06	完全刑事责任能力	1	27		1	汉族			无业		无业	广西壮族自治区宾阳县		广西壮族自治区宾阳县	中国	小学	2017-07-14	2017-12-22	拘留 逮捕	不存在明确被害人的纠纷						黄娓娓				江苏姚竹平律师事务所		0	0	0
05114_张中平、刘文安贪污罪、挪用公款罪雷洪彪贪污罪、挪用公款罪等二审刑事判决书			1		0	（2018）鄂96刑终78号	3	雷洪彪	1963-07-03	完全刑事责任能力	1	55			汉族			其他		党支部书记、社区党总支副书记、居委会副主任	潜江市		潜江市	中国	普通高级中学	2016-04-29		拘留 逮捕	其他存在明确被害人的纠纷 不存在明确被害人的纠纷												0	0	0		1	0
05115_曾仪走私、贩卖、运输、制造毒品罪一审刑事判决书		简易转普通			0	（2018）川0108刑初411号	1	曾仪	1988-10-01	完全刑事责任能力	1	30			汉族						四川省宜宾市珙县			中国	初中	2018-01-02	2018-05-24	拘留 逮捕	不存在明确被害人的纠纷						陈翔				北京市惠诚（成都）律师事务所		0	0	0
05116_夏某某强奸一审刑事判决书		简易			0	（2018）皖0124刑初22号	1	夏某某	1949-02-08	完全刑事责任能力	1	69			汉族			务农		务农	庐江县	安徽省庐江县	庐江县	中国	文盲	2017-10-20	2018-01-04	拘留 逮捕	其他存在明确被害人的纠纷						张江生		1		安徽耀真律师事务所		0	0	0				1
05118_冯兴春、罗成、叶国祥等走私、贩卖、运输、制造毒品;非法持有、私藏枪支、弹药;容留他人吸毒一审刑事判决书					0	（2018）川01刑初73号	4	冯兴春	1975-03-31	完全刑事责任能力	1	33			汉族			无业		无业	成都市武侯区	四川省绵竹县		中国	初中	2017-04-27	2018-01-31	拘留 逮捕	不存在明确被害人的纠纷						周涌涛				四川川达律师事务所		0	0	0
05119_王某1、王某2、王某3等交通肇事罪一审刑事判决书					0	（2017）浙0226刑初191号	1	周小照	1967-06-25	完全刑事责任能力	1	51			汉族			务农		务农	浙江省三门县	浙江省三门县	浙江省宁海县	中国	文盲	2015-10-28	2016-05-12	拘留 逮捕	其他存在明确被害人的纠纷			1	0		杨建员				浙江知仁律师事务所		0	0	1
05120_张浩贪污罪一审刑事判决书					0	（2013）二中刑初字第1856号	1	张浩	1983-03-10	完全刑事责任能力	1	30														2013-03-02	2013-09-26	逮捕	其他存在明确被害人的纠纷						师国荣	陈海航	1	1	北京市亿达律师事务所	北京市亿达律师事务所	0	0	0
05121_被告人孙洋洋强奸一案一审刑事判决书					0	（2017）辽0106刑初221号	1	孙洋洋	1985-12-23	完全刑事责任能力	1	32	1	1	汉族		0	无业		无业		辽宁省黑山县	辽宁省黑山县		小学	2016-12-21	2017-03-22	拘留 逮捕	其他存在明确被害人的纠纷						吕海山				辽宁楷格律师事务所		0	0	0
05123_秦华春诈骗一审刑事判决书		普通			0	（2018）鲁1327刑初783号	1	秦华春	1980-08-06	完全刑事责任能力	1	39			汉族			务农		务农		山东省沂南县	山东省沂南县		小学		2018-11-28	取保候审	其他存在明确被害人的纠纷						姜海清				山东兰友轩律师事务所		0	0	0				1
05124_张×;苗×;陈×故意伤害罪一审刑事判决书					0	（2016）京0105刑初340号	1	李国强	1979-02-04	完全刑事责任能力	1	37														2015-11-20	2016-02-24	拘留 逮捕	其他存在明确被害人的纠纷						杨秀平						0	0	0
05125_陈鹏盗窃案一审刑事判决书		简易			0	（2018）湘1121刑初73号	1	陈鹏	1986-03-16	完全刑事责任能力	1	32	1	1	汉族		0	无业		无业		湖南省祁阳县	祁阳县		初中	2017-12-07	2018-01-26	拘留 逮捕	其他存在明确被害人的纠纷												0	0	0
05126_王某强奸二审刑事判决书			1		0	（2015）秦刑终字第158号	1	王某										无业		无业						2015-05-15		拘留 取保候审 逮捕	其他存在明确被害人的纠纷						佟伟伦				河北德圣律师事务所		0	0	0		1	0	1
05127_蒋义凯贩卖、运输毒品魏先贩卖毒品王超运输毒品罪一审刑事判决书					0	（2016）川08刑初38号	3	蒋义凯	1974-03-21	完全刑事责任能力	1	42			汉族			务农		务农	四川省中江县			中国	小学	2015-12-25	2016-08-15	拘留 逮捕	不存在明确被害人的纠纷						周婷婷				四川君合律师事务所		0	0	0
05128_李峰开设赌场罪一审刑事判决书					0	（2016）皖1225刑初405号	1	李峰	1978-11-30	完全刑事责任能力	1	38			汉族			无业		无业		安徽省阜南县		中国	初中	2016-09-30	2016-12-21	拘留 逮捕	不存在明确被害人的纠纷						余朝晖				安徽余朝晖律师事务所		0	0	0				1	1
05129_谢钟荣、严建明贩卖毒品一审刑事判决书					0	（2017）渝01刑初74号	2	谢钟荣	1977-11-03	完全刑事责任能力	1	40	1	1	汉族		0	务农		务农		重庆市合川区	重庆市合川区		小学	2017-06-15	2017-06-20	拘留 取保候审 逮捕	不存在明确被害人的纠纷			1	0		陈伟	毛立志			重庆智豪律师事务所	重庆立源律师事务所	0	0	0
05130_张淘组织、领导传销活动罪二审刑事判决书			1		0	（2018）川34刑终62号	1	张淘	1993-04-20	完全刑事责任能力	1	25	0	0	汉族						四川省宁南县		宁南县	中国	初中	2017-09-15		拘留 逮捕	不存在明确被害人的纠纷						刘诚	唐华			四川星亮律师事务所	四川星亮律师事务所	0	0	0		1	0
05131_李冰走私、贩卖、运输、制造毒品一审刑事判决书		简易			0	（2018）渝0112刑初186号	1	李冰	1997-03-24	完全刑事责任能力	1	21			蒙古族			务农		务农		内蒙古自治区苏尼特右旗	内蒙古自治区苏尼特右旗			2017-12-06	2018-02-01	拘留 逮捕	不存在明确被害人的纠纷												0	0	0
05132_杨雪犯贩卖毒品、容留他人吸毒罪，龙德勇犯贩卖、运输毒品罪一审刑事判决书					0	（2015）遂中刑初字第00034号	2	杨雪	1983-06-29	完全刑事责任能力	0	32	1	1	汉族		0	无业		无业		四川省遂宁市船山区	遂宁市船山区		初中		2015-10-22	取保候审 监视居住	不存在明确被害人的纠纷						杨敏		1		四川蜀中律师事务所		0	0	0
05135_陈金碧盗窃罪一审刑事判决书		速裁			0	（2018）闽0203刑初755号	1	陈金碧	1957-10-27	完全刑事责任能力	1	61	1	1	汉族			无业		无业	福建省厦门市思明区		厦门市思明区	中国	文盲	2018-07-06	2018-09-03	拘留 逮捕	其他存在明确被害人的纠纷												0	0	0				1		1
05136_被告人欧阳某某犯诈骗罪一审刑事判决书					0	（2016）湘1021刑初246号	1	欧阳某某	1965-05-06	完全刑事责任能力	1	51			汉族							湖南省桂阳县				2016-06-01	2016-09-01	拘留 逮捕	其他存在明确被害人的纠纷			1	0		周建程				湖南善道律师事务所		0	0	0				1
05137_周洪香、刘邦猛走私、贩卖、运输、制造毒品一审刑事判决书					0	（2017）粤01刑初522号	3	周洪香	1981-05-05	完全刑事责任能力	0	36			汉族						四川省宜宾市南溪区			中国		2017-07-05	2017-12-11	拘留 逮捕	不存在明确被害人的纠纷						关欣		1		广东金桥百信律师事务所		0	0	0
05138_刘丰犯敲诈勒索罪一案一审刑事判决书					0	（2015）平刑初字第242号	1	刘丰	1990-01-19	完全刑事责任能力	1	25	0	0								江西省广丰县					2015-06-29	逮捕 拘留	其他存在明确被害人的纠纷						何效苇				河南银辉律师事务所		0	0	0				1
05139_周某甲非法转让、倒卖土地使用权一审刑事判决书					0	（2017）豫1702刑初1130号	1	周某甲	1962-06-24	完全刑事责任能力	1	55			汉族			其他		有限公司法定代表人			河南省新蔡县		普通高级中学	2017-03-04	2017-11-23	拘留 逮捕	不存在明确被害人的纠纷						崔涛峰				河南文苑律师事务所		0	0	0
05140_王某某走私、贩卖、运输、制造毒品一审刑事判决书		简易			0	（2018）沪0113刑初744号	1	王某某	1975-09-18	完全刑事责任能力	1	43	1	1	汉族						上海市宝山区			中国			2018-04-27		不存在明确被害人的纠纷												0	0	0
05141_王萍走私、贩卖、运输、制造毒品一审刑事判决书					0	（2017）云01刑初509号	1	王萍	1975-01-15	完全刑事责任能力	0	42			汉族			务农		务农	贵州省盘县		贵州省盘县	中国	文盲	2017-01-25	2017-07-25	监视居住 逮捕	不存在明确被害人的纠纷						苟陇		1		云南硕欣律师事务所		0	0	0
05142_冯伟良非法持有毒品罪一审刑事判决书		普通			0	（2012）深福法刑初字第1872号	1	冯伟良	1963-08-30	完全刑事责任能力	1	49			汉族			无业		无业	香港特别行政区		深圳市福田区	中国	初中	2012-07-20	2012-12-05	拘留 逮捕	不存在明确被害人的纠纷						郭志宇				广东华途律师事务所		0	0	0
05143_杨某某非法持有枪支案一审刑事判决书					0	（2017）湘0527刑初141号	1	杨某某	1979-12-29	完全刑事责任能力	1	39														2017-10-12	2017-12-28	拘留 逮捕	不存在明确被害人的纠纷												0	0	0				1
05144_105师保红非法经营罪一审刑事判决书					0	（2019）苏0812刑初105号	1	师保红	1982-04-12	完全刑事责任能力	1	37						无业		无业							2019-02-18	拘留 取保候审	不存在明确被害人的纠纷												0	0	0
05145_陈某某强制猥亵、侮辱一审刑事判决书		简易			0	（2017）沪0115刑初4646号	1	陈某某	1973-08-12	完全刑事责任能力	1	44			汉族						安徽省阜阳市			中国			2017-12-19		其他存在明确被害人的纠纷												0	0	0
05146_赵青云走私、贩卖、运输、制造毒品罪一审刑事判决书					0	（2013）成刑初字第21号	1	赵青云			1																	逮捕 拘留	不存在明确被害人的纠纷						曾义		1		四川公生明律师事务所		0	0	0
05147_曾某某虐待罪一审刑事判决书					0	（2014）东二法刑初字第973号	1	曾某某	1989-07-07	完全刑事责任能力	1	25	0	0	汉族			务工		务工	广东省连州市		连州市	中国	初中	2014-01-29	2014-05-28	拘留 逮捕	其他存在明确被害人的纠纷						蔡建东				湖南人和（东莞）律师事务所		0	0	0				1
05148_刘勇锋走私、贩卖、运输、制造毒品一审刑事判决书		简易			0	（2017）粤0183刑初907号	1	刘勇锋	1983-12-21	完全刑事责任能力	1	34			汉族						广东省广州市增城区			中国	高等专科学校	2017-04-21	2017-07-31	拘留 逮捕	不存在明确被害人的纠纷						李剑锋	单文雅			广东杰信律师事务所	广东杰信律师事务所	0	0	0				1
05149_樊超飞诈骗一审刑事判决书					0	（2014）咸中刑初字第00016号	1	樊某某			1				汉族			其他		退伍军人					普通高级中学		2014-01-24	逮捕 拘留	其他存在明确被害人的纠纷						刘帅		1		陕西润丰律师事务所		0	0	0
05150_被告人杨某某滥伐林木一审刑事判决书					0	（2014）西刑初字第31号	1	杨某某	1980-11-15	完全刑事责任能力	1	34			壮族			务农		务农		广西壮族自治区西林县	广西壮族自治区西林县		初中	2014-03-07	2014-04-11	拘留 逮捕	不存在明确被害人的纠纷						李东硕				广西中名律师事务所		0	0	0				1
05151_马侠合同诈骗再审刑事判决书	1		1		0	（2018）浙1082刑再1号	1	马侠	1986-01-14	完全刑事责任能力	1	32			汉族			务工		务工		浙江省临海市	临海市		高等专科学校	2015-09-28		拘留 取保候审 逮捕	其他存在明确被害人的纠纷						王海芬				浙江昶日律师事务所		0	0	0		1	0
05152_上官风娟、李春泽走私、贩卖、运输、制造毒品一审刑事判决书					0	（2018）豫01刑初117号	2	上官风娟	1970-05-06	完全刑事责任能力	0	48			回族								河南省郑州市高新技术产业开发区		普通高级中学	2018-01-12	2018-09-05	拘留 逮捕	不存在明确被害人的纠纷						孙宏磊				河南洲冠律师事务所		0	0	0
05153_孙建才等盗伐林木一审刑事判决书					0	（2017）吉7604刑初28号	3	孙建才			1				汉族								吉林省抚松县			2017-03-17	2017-07-10	拘留 逮捕	其他存在明确被害人的纠纷												0	0	0
05155_李某某、王某强奸罪一审刑事判决书					0	（2017）陕0502刑初498号	2	李某某	1990-07-02	完全刑事责任能力	1	27			汉族			务农		务农			渭南市临渭区		小学	2017-07-10	2017-11-15	拘留 逮捕	其他存在明确被害人的纠纷												0	0	0				1
05157_贺俊盗窃罪再审刑事判决书				1	0	（2016）湘02刑再1号	1	贺俊	1997-06-02	完全刑事责任能力	1	19	0	0	汉族			务农		务农	湖南省娄底市双峰县		湖南省株洲市天元区	中国	初中	2015-05-29		拘留 逮捕	其他存在明确被害人的纠纷						袁芳		1		株洲市芦淞区法律援助中心		0	0	0		1	0	1	1
05158_被告人曾志耀交通肇事罪一审刑事判决书		简易			0	（2016）闽0526刑初208号	1	曾志耀			1		0	1												2016-09-15	2016-10-20	拘留 监视居住 逮捕	其他存在明确被害人的纠纷												0	0	0
05159_史某某虚开增值税专用发票、用于骗取出口退税、抵扣税款发票罪一审刑事判决书		简易			0	（2017）鲁0113刑初71号	1	史某某	1954-11-25	完全刑事责任能力	0	63			汉族			其他		其他		山东省济南市	济南市历下区		普通高级中学	2017-01-06	2017-03-27	拘留 逮捕	不存在明确被害人的纠纷						申照杰				山东华林律师事务所		0	0	0
05160_颜子豪、颜天真犯故意伤害罪田某犯窝藏、包庇罪二审刑事判决书			1		0	（2016）浙刑终72号	3	颜子豪			1							无业		无业						2015-05-14		拘留 逮捕	其他存在明确被害人的纠纷												0	0	0
05161_许建伟、李照君职务侵占、掩饰、隐瞒犯罪所得、犯罪所得收益一审刑事判决书			1		0	（2015）古刑重字第6号	4	许建伟										务工		务工						2014-03-07	2014-09-29	拘留 逮捕	其他存在明确被害人的纠纷			1	0		王涛				河北北辰律师事务所		0	0	0	1			1
05162_张盛大、王俊龙骗购外汇二审刑事判决书			1		0	（2016）粤刑终78号	5	张盛大	1972-02-20	完全刑事责任能力	1	44			汉族						广东省汕头市潮阳区		深圳市福田区	中国	普通高级中学	2014-10-31		拘留 逮捕	其他存在明确被害人的纠纷						郑剑民				广东旭晨律师事务所		0	0	0
05164_徐泽尚、陈健贩卖毒品一审刑事判决书					0	（2017）粤02刑初22号	2	徐泽尚	1965-03-04	完全刑事责任能力	1	52	1	1	汉族		0	无业		无业	广东省韶关市浈江区	湖南省湘潭市	韶关市浈江区	中国	初中	2016-12-21	2017-06-05	拘留 逮捕	不存在明确被害人的纠纷						廖燕		1		韶关市法律援助处		0	0	0
05165_被告人赵孝康走私、贩卖、运输、制造毒品罪一审刑事判决书		简易			0	（2016）苏0104刑初987号	1	赵孝康	1962-03-12	完全刑事责任能力	1	54	1	1	汉族		0	无业		无业		江苏省南京市	南京市秦淮区		文盲	2016-09-21	2016-11-29	拘留 逮捕	不存在明确被害人的纠纷												0	0	0				1
05166_张永红、曹银虎、彭建华犯走私、贩卖、运输、制造毒品一审刑事判决书					0	（2018）川04刑初22号	3	张永红	1973-04-10	完全刑事责任能力	1	45	0	1	汉族						四川省攀枝花市		四川省攀枝花市	中国	初中	2017-12-01	2018-08-07	拘留 逮捕	不存在明确被害人的纠纷						张华				四川渡攀律师事务所		0	0	0					0
05167_金建平、吕悦明内幕交易、泄露内幕信息罪一审刑事判决书					0	（2013）浙嘉刑初字第49号	2	金建平																		2012-10-11	2013-06-24	拘留 取保候审 逮捕	不存在明确被害人的纠纷						姚武强	张奇					0	0	0					1
05168_吕静、周建然一审刑事判决书		速裁			0	（2018）津0114刑初189号	2	吕静	1987-10-21	完全刑事责任能力	1	31	1	1	汉族								天津市武清区			2018-02-08		拘留 逮捕	不存在明确被害人的纠纷												0	0	0				1
05169_魏某某走私、贩卖、运输、制造毒品一审刑事判决书					0	（2018）鲁0602刑初222号	1	魏某某	1983-04-22	完全刑事责任能力	0	35			汉族			无业		无业	辽宁省新宾满族自治县	辽宁省新宾满族自治县	烟台市芝罘区	中国	初中	2017-11-03	2018-03-16	拘留 逮捕	不存在明确被害人的纠纷												0	0	0				1
05170_卢浪犯窝藏罪、非法持有枪支罪一案一审刑事判决书					0	（2017）川1622刑初57号	1	卢浪	1985-09-07	完全刑事责任能力	1	32	0	1	汉族								四川省武胜县			2016-10-11	2017-03-15	拘留 逮捕	不存在明确被害人的纠纷			1	0		廖超				四川君尊律师事务所		0	0	0
05171_周文教抢劫罪，周文教盗窃罪一审刑事判决书					0	（2013）浙绍刑初字第25号	1	周文教		完全刑事责任能力			1	1												2012-08-14	2013-03-29	拘留 逮捕	其他存在明确被害人的纠纷						赵秋月		1				0	0	0
05173_被告人徐XX犯故意伤害罪一案一审刑事判决书	1				0	（2014）潭刑初字第24号	1	徐XX			1				藏族												2014-09-15	取保候审	其他存在明确被害人的纠纷						李平				甘南羚城律师事务所		0	0	1
05175_邵智鑫、张金成、贾学武贩卖、运输毒品一审刑事判决书					0	（2017）陕09刑初18号	3	邵智鑫	1985-06-23	完全刑事责任能力	1	32	1	1	汉族		0	无业		无业	吉林省桦甸市	吉林省	四川省安岳县	中国	初中	2017-01-25	2017-07-26	拘留 逮捕	不存在明确被害人的纠纷						曾辉		1		陕西腾浩律师事务所		0	0	0
05176_张俊、李婉丽一审刑事判决书					0	（2018）云03刑初65号	3	张俊	1989-01-07	完全刑事责任能力	1	29			汉族							云南省罗平县	罗平县		初中	2017-07-28	2018-05-10	拘留 逮捕	不存在明确被害人的纠纷						陈改莲	刘佰稳			云南骏竹春律师事务所	云南腊山律师事务所	0	0	0
05177_倪泽波非法持有毒品罪一审刑事判决书					0	（2019）桂0108刑初402号	1	倪泽波	1965-03-12	完全刑事责任能力	1	54			汉族			无业		无业		广西壮族自治区钦州市	南宁市良庆区		高等专科学校	2019-08-07	2019-11-15	拘留 逮捕	不存在明确被害人的纠纷												0	0	0
05178_薛明成走私、贩卖、运输、制造毒品罪一审刑事判决书		普通			0	（2015）东二法刑初字第1497号	1	薛明成	1979-06-29	完全刑事责任能力	1	36			汉族			无业		无业	四川省古蔺县		古蔺县	中国	初中	2015-05-29	2015-09-01	拘留 逮捕	不存在明确被害人的纠纷						周乃文				广东南天星律师事务所		0	0	0					0
05179_犹联美、薛元庆组织卖淫二审刑事判决书			1		0	（2018）黔01刑终124号	2	犹联美	1970-03-26	完全刑事责任能力	0	48			汉族			其他		法定代表人	重庆市万盛区	重庆市万盛区	贵州省清镇市	中国	初中	2017-07-07		拘留 逮捕	不存在明确被害人的纠纷												0	0	0
05180_陈某伟故意毁坏财物一审刑事判决书					0	（2017）粤1581刑初232号	1	陈某伟	1996-04-01	完全刑事责任能力	1	21	0	1	汉族			务工			广东省陆丰市		广东省陆丰市	中国	初中	2017-03-09	2017-07-24	拘留 逮捕	其他存在明确被害人的纠纷												0	0	0				1
05181_郑双春引诱、容留、介绍卖淫罪一审刑事判决书		简易			0	（2019）浙0381刑初292号	1	郑双春	1986-02-19	完全刑事责任能力	0	33	1	1	汉族		0	其他		无业	贵州省正安县	贵州省正安县		中国	初中	2018-12-14	2019-02-22	拘留 逮捕	不存在明确被害人的纠纷												0	0	0
05182_焦亚玲走私、贩卖、运输、制造毒品一审刑事判决书		简易			0	（2018）鄂0106刑初473号	1	焦亚玲	1968-05-19	完全刑事责任能力	0	50			汉族			无业		无业	湖北省武汉市江汉区	武汉市		中国	初中	2018-04-12	2018-05-08	拘留 逮捕	不存在明确被害人的纠纷												0	0	0				1
05183_李某寻衅滋事罪一审刑事判决书					0	（2017）鄂1083刑初49号	1	李某										无业		无业						2017-03-29	2017-03-28	拘留 取保候审 逮捕	其他存在明确被害人的纠纷												0	0	0
05184_(2018)233号张文全强奸一审刑事判决书					0	（2018）鲁1323刑初233号	1	张文全	1958-01-29	完全刑事责任能力	1	60			汉族			务农		务农			山东省沂水县		文盲	2017-07-05	1900-01-01	拘留 逮捕 取保候审													0	0	0				1
05185_姚虹、匡燕等人犯制造毒品罪一审刑事判决书					0	（2015）成刑初字第106号	4	姚虹	1983-12-23	完全刑事责任能力	0	32	1	1	汉族		0	无业		无业		重庆市大足县	重庆市大足县		初中	2014-11-21		拘留 逮捕	不存在明确被害人的纠纷						何秦	兰华开			四川秦和武律师事务所	四川谦信律师事务所	0	0	0
05186_陈某、代发明等犯盗窃罪一审刑事判决书		简易			0	（2015）雁江刑初字第264号	5	代发明					1	1			0	无业		无业						2015-06-19	2015-09-14	拘留 逮捕	其他存在明确被害人的纠纷												0	0	0
05187_郭海平走私、贩卖、运输、制造毒品、非法持有、私藏枪支、弹药、容留他人吸毒一审刑事判决书			1		0	（2017）粤15刑初62号	1	郭海平	1982-03-01	完全刑事责任能力	1	35			汉族			无业		无业	广东省惠州市惠东县		惠东县	中国	初中	2015-12-25		拘留 逮捕	不存在明确被害人的纠纷						杨雪标		1		汕尾市法律援助处		0	0	0	1
05188_刘运、孙某甲犯诈骗罪一审刑事判决书					0	（2015）德刑初字第1号	2	刘运										务农		务农						2014-05-20	2014-12-04	拘留 取保候审 逮捕	其他存在明确被害人的纠纷			1	0		王弟林				江西博阳律师事务所		0	0	0
05189_刘良书危险驾驶一审刑事判决书		简易			0	（2017）沪0112刑初84号	1	刘良书	1976-08-12	完全刑事责任能力	1	41									四川省			中国			2017-01-11	逮捕 拘留	不存在明确被害人的纠纷												0	0	0
05190_单位上海贞乾投资管理有限公司非法吸收公众存款二审刑事判决书			1		0	（2016）沪02刑终1159号	3	徐有高	1967-09-18	完全刑事责任能力	1	49			汉族								浙江省衢州市						其他存在明确被害人的纠纷						陆利平				上海市联合律师事务所		0	0	0			1
05191_张春志走私、贩卖、运输、制造毒品罪一审刑事判决书					0	（2017）渝0107刑初803号	1	张春志			1				汉族			无业		无业		四川省彭州市	四川省彭州市		小学	2017-03-30	2017-06-19	拘留 逮捕	不存在明确被害人的纠纷												0	0	0
05192_黄毓全、韩旭、肖兴富、王首翔、朱守彬、罗永强犯贩卖毒品罪一审刑事判决书					0	（2014）宜中刑二初字第14号	6	黄毓全	1981-10-09	完全刑事责任能力	1	33			汉族			无业		无业	四川省中江县			中国	初中	2013-10-30	2014-07-01	拘留 逮捕	不存在明确被害人的纠纷						周向阳				四川时代经纬律师事务所		0	0	0
05193_王冬强奸罪一审刑事判决书					0	（2018）浙0784刑初1143号	1	王冬	1997-05-10	完全刑事责任能力	1	21			汉族			务农		务农		贵州省毕节市	贵州省毕节市		初中	2018-08-13	2018-10-11	拘留 逮捕							李卓毅		1		永康市法律援助中心		0	0	0
05194_龙胜江走私、贩卖、运输、制造毒品、容留他人吸毒一审刑事判决书		简易转普通			0	（2018）湘0181刑初3号	1	龙胜江	1973-03-14	完全刑事责任能力	1	45			汉族			无业		无业	浏阳市	湖南省浏阳市	长沙市雨花区	中国	初中	2017-08-03	2018-01-03	拘留 逮捕	不存在明确被害人的纠纷						冯玉	林丽娟			湖南鼎忠律师事务所	湖南鼎忠律师事务所	0	0	0
05195_张国栋贷款诈骗罪一审刑事判决书					0	（2019）晋0109刑初832号	1	张国栋	1971-10-20	完全刑事责任能力	1	48	0	0	汉族			无业		无业	山西省忻州市	山西省忻州市	太原市	中国	初中	2019-07-11	2019-10-09	拘留 逮捕	其他存在明确被害人的纠纷						朱秀秀				北京隆安（太原）律师事务所		0	0	0				1	1
05196_郑某某玩忽职守罪一审刑事判决书					0	（2014）黔六特刑初字第344号	1	郑某某	1966-09-19	完全刑事责任能力	1	49			汉族			其他		村民委员会主任		贵州省六枝特区			初中		2014-09-15	取保候审	不存在明确被害人的纠纷												0	0	0				1
05197_殷炳维贩卖毒品罪一审刑事判决书		简易			0	（2018）渝0103刑初717号	1	殷炳维	1963-10-18	完全刑事责任能力	0	55	1	1	汉族		0	无业		无业	重庆市垫江县	重庆市垫江县	重庆市渝中区	中国	小学	2018-05-24	2018-07-26	拘留 逮捕	不存在明确被害人的纠纷												0	0	0
05198_毛江平、毛日新诈骗罪一审刑事判决书		简易转普通			0	（2014）衢柯刑初字第161号	2	毛某甲																		2013-08-07	2014-03-18	拘留 逮捕	其他存在明确被害人的纠纷						王正军						0	0	0
05199_冯勇刚受贿一审刑事判决书					0	（2017）川1302刑初485号	1	冯勇刚	1976-04-05	完全刑事责任能力	1	42			汉族			其他		区委干部	南充市顺庆区		南充市顺庆区	中国	大学本科		2017-04-19	取保候审	不存在明确被害人的纠纷												0	0	0				1	1
[truncated: 1,991 more rows]
[truncated: 2,146 more columns]
